# Supplementary material
Source: HighWire-hosted journal article supplement (doi:10.1101/rna.070318.119)
Supplement: Supplemental_Figure_S1.pdf [file Supplemental_Figure_S1.pdf]

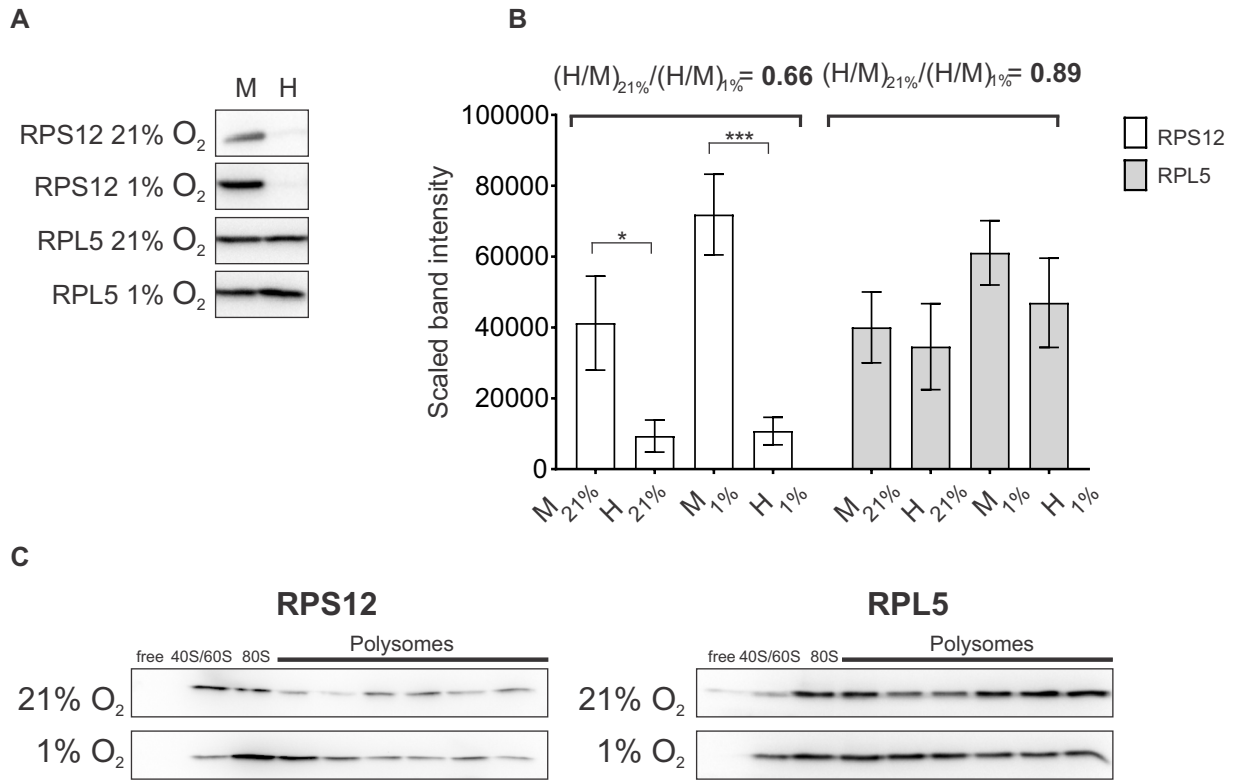

**Figure S1. Confirmation of mass spectrometry data by western blot.** (A) Representative western blot of RPS12 and RPL5 levels in 80S monosomes (M) and heavy polysomes (H) of HEK293 cells in 21% O<sub>2</sub> (normoxia) and 1% O<sub>2</sub> (hypoxia). (B) Band intensities were scaled based on individual images and average scaled intensities are shown for  $n = 8 \pm$  s.e.m. \* =  $p < 0.05$ , \*\*\* =  $p < 0.001$ . The ratio of L/M and H/M in hypoxia relative to normoxia is shown. (C) Western blot of RPS12 and RPL5 on whole polysome gradients (unpooled fractions).
