# Supplementary material
Source: HighWire-hosted journal article supplement (doi:10.1101/rna.070318.119)
Supplement: Supplemental_Figure_S2.pdf [file Supplemental_Figure_S2.pdf]

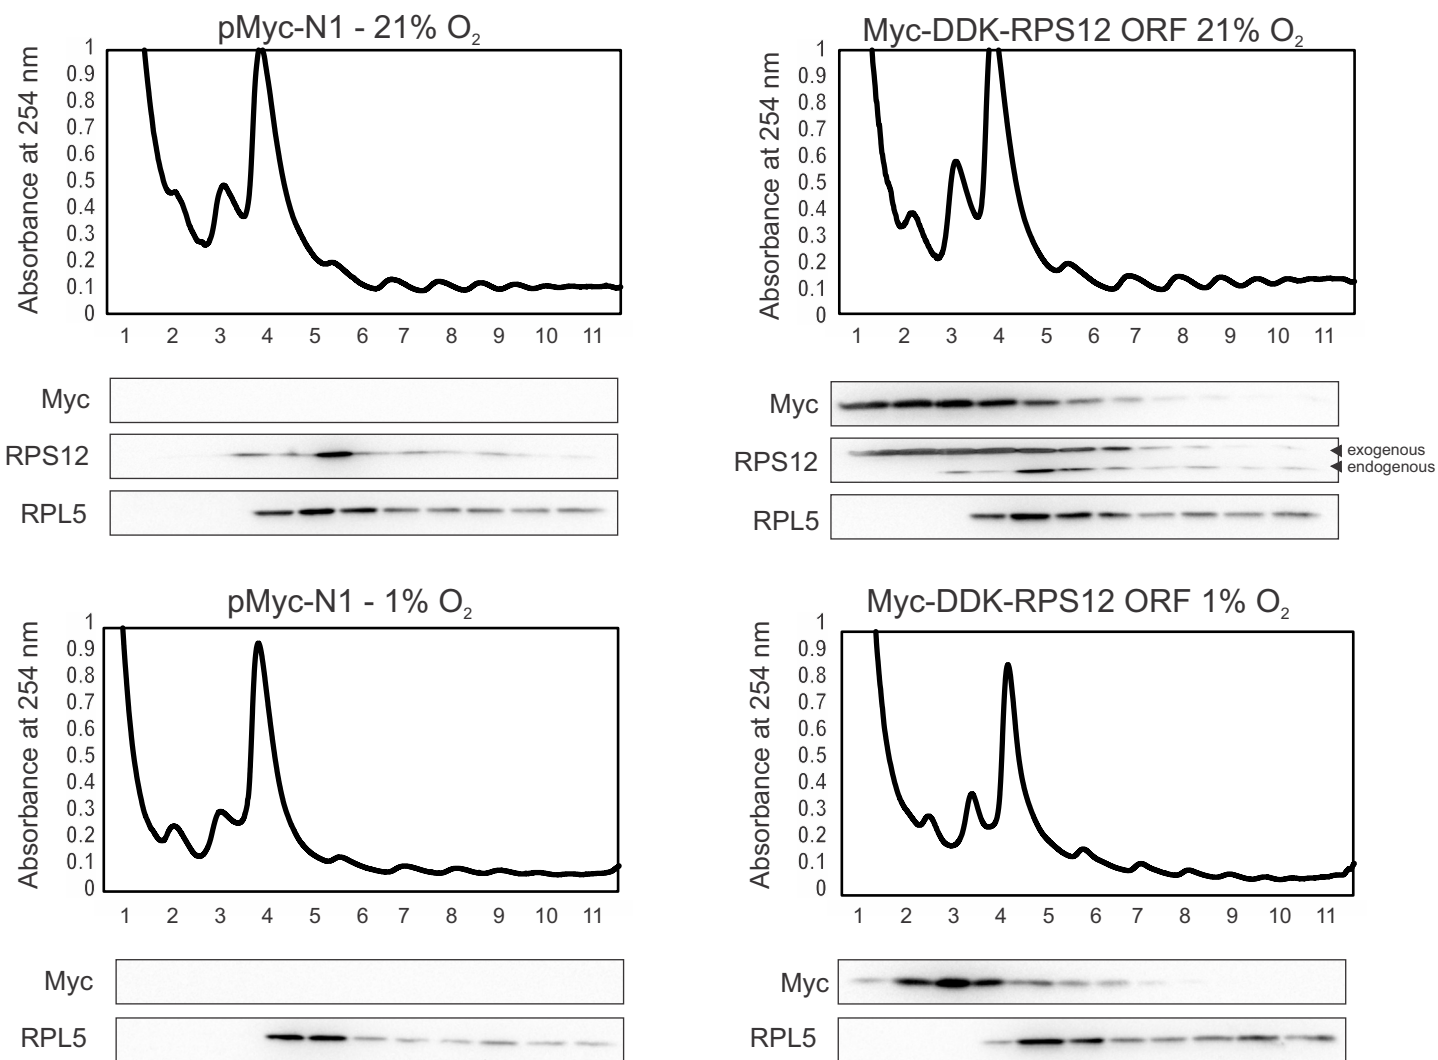

**Figure S2. Exogenous RPS12 associates with polysome fractions.** Polysome profiles for normoxic (21% O<sub>2</sub>) and hypoxic (1% O<sub>2</sub>) HEK293 cells overexpressing RPS12 (Myc-DDK-RPS12) or empty vector control (pMyc-N1) are shown. Western blot for the Myc tag of exogenous RPS12 demonstrates polysome association. RPL5 was used to indicate protein presence in polysome fractions. Endogenous RPS12 is included for 21% O<sub>2</sub>.
