# Supplementary material
Source: HighWire-hosted journal article supplement (doi:10.1101/rna.070318.119)
Supplement: Supplemental_Figure_S3.pdf [file Supplemental_Figure_S3.pdf]

**A**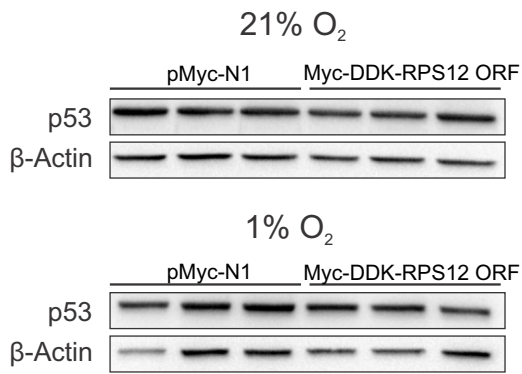**B**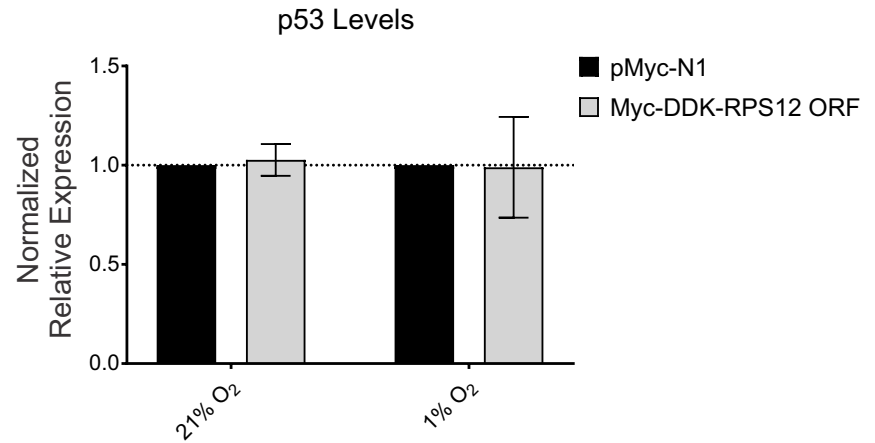

**Figure S3. RPS12 overexpression does not augment p53 levels.** (A) Western blots for p53 levels using  $\beta$ -Actin as loading control from normoxic (21% O<sub>2</sub>) and hypoxic (1% O<sub>2</sub>) HEK293 cells overexpressing RPS12 (Myc-DDK-RPS12) or empty vector control (pMyc-N1). (B) Quantification of western blots from (A), normalizing band intensity of p53 to  $\beta$ -Actin and making relative to empty vector control. Data (n = 3), mean  $\pm$  s.e.m. Two tailed unpaired t-test was performed.
