# Supplementary material
Source: HighWire-hosted journal article supplement (doi:10.1101/rna.070318.119)
Supplement: Supplemental_Figure_S4.pdf [file Supplemental_Figure_S4.pdf]

### Total *SLC2A1*/GLUT1 mRNA

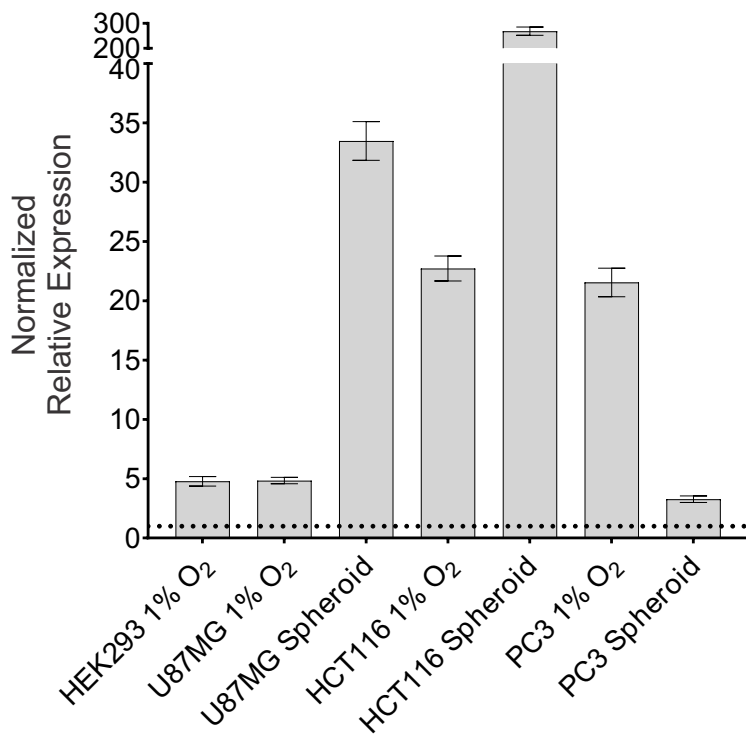

**Figure S4. *SLC2A1* transcripts encoding GLUT1 are increased in hypoxic cells and spheroids used for ASPCR.** The expression of a hypoxia marker (GLUT1) was used to confirm hypoxia (1% O<sub>2</sub>) in cells and spheroid ASPCR samples via RT-qPCR. Data (n = 3 technical replicates) are mean ± s.e.m. Hypoxic GLUT1 mRNA expression normalized to RPLP0 and made relative to respective normoxic samples (dotted line at y=1).
