# Supplementary material
Source: HighWire-hosted journal article supplement (doi:10.1101/rna.070318.119)
Supplement: Supplemental_Figure_S5.pdf [file Supplemental_Figure_S5.pdf]

### RPL10 e1

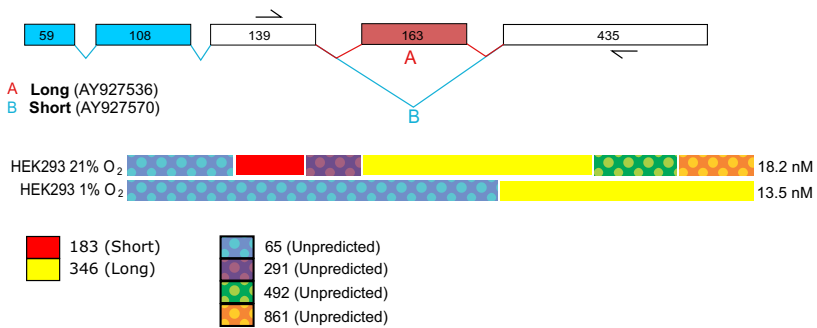

### RPL17 e2

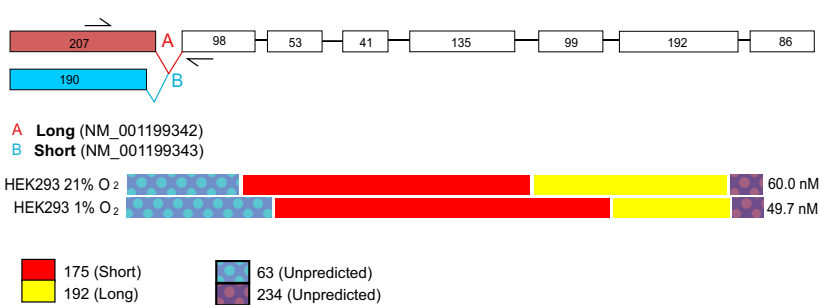

### RPL22L1

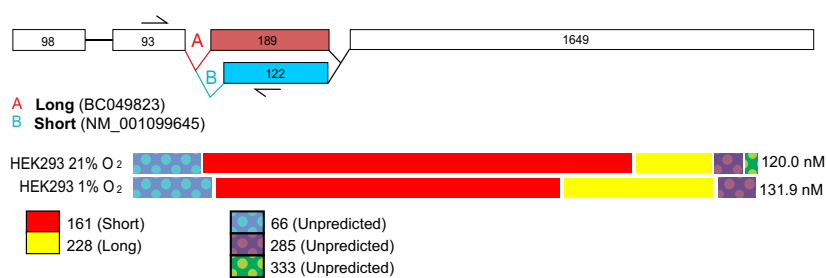

### RPS24 e2

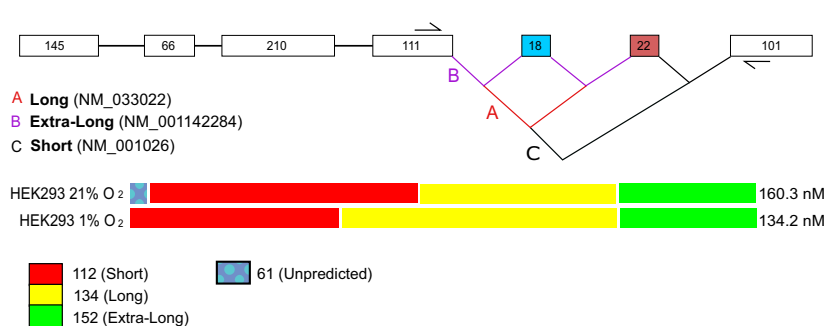

### RPS9 e3

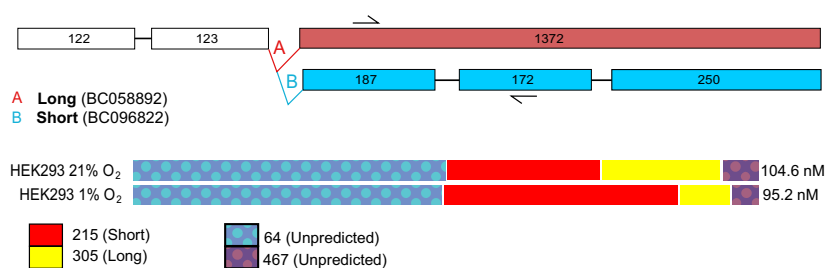

**Figure S5. Splicing maps of alternative splicing events with hypoxic  $\Delta$ PSI > 10%.** Shown are the variants amplified by the primer set (harpoons) for each splicing event. The relative length of the colored/patterned bars represents the proportion of that particular amplicon, with the length in base pairs displayed in the legend. Long vs. short nomenclature is based on the size of the amplicon and not the total transcript length. White exons are common to both variants and color-coded exons are variant specific. Maps designed based on AceView.
