# Supplementary material
Source: HighWire-hosted journal article supplement (doi:10.1101/rna.070318.119)
Supplement: Supplemental_Source_Data_for_Figure1.xlsx [file Supplemental_Source_Data_for_Figure1.xlsx]

## Sheet: All
Checked	Protein FDR Confidence: Combined	Master	Accession	Description	Exp. q-value: Combined	Sum PEP Score	Coverage [%]	# Peptides	# PSMs	# Unique Peptides	# Protein Groups	# AAs	MW [kDa]	calc. pI	Score MS Amanda 2.0: MS Amanda 2.0	Score Sequest HT: Sequest HT	# Peptides (by Search Engine): MS Amanda 2.0	# Peptides (by Search Engine): Sequest HT	Biological Process	Cellular Component	Molecular Function	Pfam IDs	Entrez Gene ID	Ensembl Gene ID	Gene Symbol	Chromosome	KEGG Pathways	WikiPathways	# Razor Peptides	Avg. Abundance: M - 21% O2	CV: M - 21% O2 (%)	Avg. Abundance: L - 21% O2	CV: L - 21% O2 (%)	Avg. Abundance: H - 21% O2	CV: H - 21% O2 (%)	Avg. Abundance: M - 1% O2	CV: M - 1% O2 (%)	Avg. Abundance: L - 1% O2	CV: L - 1% O2 (%)	Avg. Abundance: H - 1% O2	CV: H - 1% O2 (%)	Ratio: L/M - 21% O2	Ratio: H/M - 21% O2	Ratio: L/M - 1% O2	Ratio: H/M - 1% O2			Abundances: F4, Monosome, Normoxic	Abundances: F1, Monosome, Normoxic
FALSE	High	Master Protein	Q09666	Neuroblast differentiation-associated protein AHNAK OS=Homo sapiens GN=AHNAK PE=1 SV=2	0	558.535	44	124	475	124	1	5890	628.7	6.15	70969.8	484.53	120	123	cell organization and biogenesis;regulation of biological process	cytoplasm;cytoskeleton;cytosol;membrane;nucleus	protein binding;RNA binding;structural molecule activity		79026	ENSG00000124942.13	AHNAK	11			0	106.5	13.077	89.7	4.98441	79.1	31.2989	108.667	25.3311	124.733	12.26	91.2333	18.6472	0.842254	0.742723	1.14785	0.839571			122.5	97.1
FALSE	High	Master Protein	P78527	DNA-dependent protein kinase catalytic subunit OS=Homo sapiens GN=PRKDC PE=1 SV=3	0	547.4	28	109	531	109	1	4128	468.8	7.12	87802.6	610.2	109	107	cell death;cell differentiation;cell organization and biogenesis;cell proliferation;defense response;metabolic process;regulation of biological process;response to stimulus	cytosol;membrane;nucleus	catalytic activity;DNA binding;nucleotide binding;protein binding;RNA binding	Pf00454, Pf02259, Pf02260, Pf08163	5591	ENSG00000253729.7	PRKDC	8	Non-homologous end-joining; Cell cycle	ATM Signaling Network in Development and Disease; miRNA Regulation of DNA Damage Response; Non-homologous end joining; Fas Ligand (FasL) pathway and Stress induction of Heat Shock Proteins (HSP) regulation; Pathways Affected in Adenoid Cystic Carcinoma; DNA Damage Response; Retinoblastoma (RB) in Cancer; Cell Cycle	0	116.2	33.2437	77.7667	12.9929	82	13.7199	153.733	46.5288	93.3667	18.7847	76.9333	16.3677	0.669248	0.70568	0.607329	0.500434			73.1	127.8
FALSE	High	Master Protein	P0DMV9	Heat shock 70 kDa protein 1B OS=Homo sapiens GN=HSPA1B PE=1 SV=1	0	532.959	71	42	687	32	1	641	70	5.66	142584	937.41	41	42	cell organization and biogenesis;metabolic process;regulation of biological process;response to stimulus;transport	cytoplasm;cytoskeleton;cytosol;endoplasmic reticulum;extracellular;mitochondrion;nucleus	catalytic activity;nucleotide binding;protein binding;receptor activity;RNA binding	Pf00012, Pf06723	3303; 3304	ENSG00000232804.5; ENSG00000234475.5; ENSG00000231555.4; ENSG00000235941.5; ENSG00000204389.9; ENSG00000204388.6; ENSG00000212866.6; ENSG00000237724.5; ENSG00000224501.5	HSPA1A; HSPA1B	6; CHR_HSCHR6_MHC_APD_CTG1; CHR_HSCHR6_MHC_DBB_CTG1; CHR_HSCHR6_MHC_QBL_CTG1; CHR_HSCHR6_MHC_COX_CTG1	Longevity regulating pathway - multiple species; MAPK signaling pathway; Influenza A; Endocytosis; Spliceosome; Measles; Antigen processing and presentation; Epstein-Barr virus infection; Toxoplasmosis; Legionellosis; Prion diseases; Protein processing in endoplasmic reticulum; Estrogen signaling pathway	VEGFA-VEGFR2 Signaling Pathway; Apoptosis Modulation and Signaling; MAPK Signaling Pathway; NRF2 pathway; Parkin-Ubiquitin Proteasomal System pathway; Apoptosis Modulation by HSP70	11	106.2	18.4396	86.0333	13.6748	84.7333	22.8751	107.6	24.9357	117.333	11.2569	98.1	11.2505	0.810107	0.797866	1.09046	0.91171			128.7	96.9
FALSE	High	Master Protein	P35579	Myosin-9 OS=Homo sapiens GN=MYH9 PE=1 SV=4	0	491.532	37	77	354	65	1	1960	226.4	5.6	64270.4	447.94	74	73	cell differentiation;cell organization and biogenesis;cellular component movement;metabolic process;regulation of biological process;response to stimulus;transport	cytoplasm;cytoskeleton;cytosol;extracellular;membrane;nucleus	catalytic activity;motor activity;nucleotide binding;protein binding;RNA binding;transporter activity	Pf00063, Pf01442, Pf01496, Pf01576, Pf01765, Pf02736, Pf03962, Pf04111, Pf04156, Pf05911, Pf06637, Pf07888, Pf09731, Pf11068, Pf11559, Pf12128, Pf13094	4627	ENSG00000100345.20	MYH9	22	Tight junction; Regulation of actin cytoskeleton; Salmonella infection	Primary Focal Segmental Glomerulosclerosis FSGS; VEGFA-VEGFR2 Signaling Pathway	12	102.667	11.6453	74.6667	5.41266	88.3333	4.52028	145.433	9.36559	99.9	0.436326	88.9667	10.6375	0.727273	0.86039	0.686913	0.611735			104	90.1
FALSE	High	Master Protein	Q14204	Cytoplasmic dynein 1 heavy chain 1 OS=Homo sapiens GN=DYNC1H1 PE=1 SV=5	0	433.401	20	82	327	82	1	4646	532.1	6.4	54483.3	367.46	81	78	cell division;cell organization and biogenesis;cellular component movement;regulation of biological process;transport	cytoplasm;cytoskeleton;cytosol;extracellular;membrane;organelle lumen	catalytic activity;motor activity;nucleotide binding;protein binding;RNA binding	Pf00769, Pf03028, Pf03915, Pf04156, Pf07246, Pf07728, Pf08385, Pf08393, Pf12774, Pf12775, Pf12777, Pf12780, Pf12781, Pf13173, Pf13207, Pf13401	1778	ENSG00000197102.10	DYNC1H1	14	Salmonella infection; Vasopressin-regulated water reabsorption; Phagosome		0	120.933	20.3722	88.4	21.8238	84.7	10.1638	126.3	23.182	96.9667	14.4532	82.6333	11.2697	0.730981	0.700386	0.767749	0.654262			99.4	115.6
FALSE	High	Master Protein	P10809	60 kDa heat shock protein, mitochondrial OS=Homo sapiens GN=HSPD1 PE=1 SV=2	0	416.124	76	39	378	39	1	573	61	5.87	73707.2	461.21	39	39	cell organization and biogenesis;cell proliferation;metabolic process;regulation of biological process;response to stimulus;transport	cell surface;cytoplasm;cytosol;endosome;membrane;mitochondrion;organelle lumen	catalytic activity;DNA binding;nucleotide binding;protein binding;RNA binding	Pf00118	3329	ENSG00000144381.16	HSPD1	2	Tuberculosis; Legionellosis; Type I diabetes mellitus; RNA degradation	Apoptosis-related network due to altered Notch3 in ovarian cancer; Sudden Infant Death Syndrome (SIDS) Susceptibility Pathways	0	115.233	10.7118	95.5	10.4061	74.6333	9.58399	119.133	10.4535	107.967	2.95421	87.4667	10.8657	0.828753	0.647671	0.906267	0.734191			123	101
FALSE	High	Master Protein	Q00610	Clathrin heavy chain 1 OS=Homo sapiens GN=CLTC PE=1 SV=5	0	413.2	46	62	306	62	1	1675	191.5	5.69	52749.6	346.97	62	61	cell differentiation;cell division;cell organization and biogenesis;cellular component movement;metabolic process;regulation of biological process;response to stimulus;transport	cytoplasm;cytoskeleton;cytosol;endosome;membrane;vacuole	protein binding;RNA binding;structural molecule activity	Pf00637, Pf01394, Pf04053, Pf09268, Pf13838	1213	ENSG00000141367.11	CLTC	17	Bacterial invasion of epithelial cells; Lysosome; Huntington's disease; Synaptic vesicle cycle; Endocrine and other factor-regulated calcium reabsorption; Endocytosis	VEGFA-VEGFR2 Signaling Pathway; Synaptic Vesicle Pathway; Complement and Coagulation Cascades	0	95.7333	11.0593	94.5667	14.0065	86.1333	10.5773	110.967	18.5305	121.733	13.4767	90.8333	6.86847	0.987813	0.899721	1.09703	0.818564			83.8	104
FALSE	High	Master Protein	P13639	Elongation factor 2 OS=Homo sapiens GN=EEF2 PE=1 SV=4	0	380.318	62	49	402	48	1	858	95.3	6.83	73689.3	459.63	49	46	cell differentiation;cell proliferation;metabolic process;regulation of biological process;response to stimulus;transport	cytoplasm;cytosol;extracellular;membrane;nucleus;organelle lumen;ribosome	catalytic activity;nucleotide binding;protein binding;RNA binding	Pf00009, Pf00679, Pf03144, Pf03764, Pf14492	1938	ENSG00000167658.15	EEF2	19	AMPK signaling pathway; Oxytocin signaling pathway	Brain-Derived Neurotrophic Factor (BDNF) signaling pathway; Translation Factors; AMP-activated Protein Kinase (AMPK) Signaling	1	116.967	23.4614	111.167	7.08668	83.8333	10.112	123.833	22.8306	88.8333	14.2037	75.4667	9.4689	0.950413	0.716728	0.717362	0.609421			93.2	110.7
FALSE	High	Master Protein	P21333	Filamin-A OS=Homo sapiens GN=FLNA PE=1 SV=4	0	375.949	39	72	310	64	1	2647	280.6	6.06	54857	363.08	70	72	cell organization and biogenesis;cellular component movement;metabolic process;regulation of biological process;response to stimulus;transport	cytoplasm;cytoskeleton;cytosol;extracellular;membrane;nucleus	protein binding;RNA binding;signal transducer activity	Pf00307, Pf00630	2316	ENSG00000196924.14	FLNA	X	Proteoglycans in cancer; MAPK signaling pathway; Salmonella infection; Focal adhesion	Prolactin Signaling Pathway; MAPK Signaling Pathway; Androgen receptor signaling pathway; Hypothesized Pathways in Pathogenesis of Cardiovascular Disease; IL-4 Signaling Pathway; Focal Adhesion	8	103.433	9.18432	82.7333	10.0674	103.133	12.7129	90.3	16.4589	107	7.05035	113.433	6.0626	0.799871	0.9971	1.18494	1.25618			95.6	114
FALSE	High	Master Protein	P68371	Tubulin beta-4B chain OS=Homo sapiens GN=TUBB4B PE=1 SV=1	0	374.562	75	27	426	3	1	445	49.8	4.89	71105.9	523.52	26	27	cell organization and biogenesis;cellular component movement;defense response;regulation of biological process;response to stimulus;transport	cytoplasm;cytoskeleton;cytosol;extracellular;nucleus;organelle lumen	catalytic activity;nucleotide binding;protein binding;RNA binding;structural molecule activity	Pf00091, Pf03953, Pf10644	10383	ENSG00000188229.5	TUBB4B	9	Phagosome; Pathogenic Escherichia coli infection; Gap junction	Parkin-Ubiquitin Proteasomal System pathway; Pathogenic Escherichia coli infection	1	111	7.51105	81.7667	23.2755	81.9333	17.6937	112.167	32.4044	125.233	7.09566	87.9333	7.61715	0.736637	0.738138	1.11649	0.783952			104.9	107.6
FALSE	High	Master Protein	P07437	Tubulin beta chain OS=Homo sapiens GN=TUBB PE=1 SV=2	0	367.199	82	28	433	5	1	444	49.6	4.89	73018.7	544.95	27	28	cell division;cell organization and biogenesis;cellular component movement;defense response;regulation of biological process;response to stimulus;transport	cytoplasm;cytoskeleton;extracellular;membrane;nucleus;organelle lumen	catalytic activity;nucleotide binding;protein binding;structural molecule activity	Pf00091, Pf03953, Pf10644	203068	ENSG00000232575.10; ENSG00000196230.12; ENSG00000227739.10; ENSG00000224156.10; ENSG00000235067.10; ENSG00000229684.10; ENSG00000183311.16; ENSG00000232421.10	TUBB	6; CHR_HSCHR6_MHC_MANN_CTG1; CHR_HSCHR6_MHC_COX_CTG1; CHR_HSCHR6_MHC_APD_CTG1; CHR_HSCHR6_MHC_DBB_CTG1; CHR_HSCHR6_MHC_MCF_CTG1; CHR_HSCHR6_MHC_QBL_CTG1; CHR_HSCHR6_MHC_SSTO_CTG1	Gap junction; Pathogenic Escherichia coli infection; Phagosome	Parkin-Ubiquitin Proteasomal System pathway; Pathogenic Escherichia coli infection	40	111.833	13.4266	84.4667	15.5737	87.8	14.4566	111.9	24.6845	114.067	7.73386	90	4.66667	0.755291	0.785097	1.01936	0.80429			94.6	122.1
FALSE	High	Master Protein	P06733	Alpha-enolase OS=Homo sapiens GN=ENO1 PE=1 SV=2	0	365.339	79	33	478	29	1	434	47.1	7.39	89838.3	643.76	33	33	metabolic process;regulation of biological process;response to stimulus	cell surface;cytoplasm;cytosol;membrane;nucleus	catalytic activity;DNA binding;metal ion binding;protein binding;RNA binding	Pf00113, Pf03952, Pf13378	2023	ENSG00000074800.13	ENO1	1	Glycolysis / Gluconeogenesis; RNA degradation; HIF-1 signaling pathway; Metabolic pathways; Biosynthesis of amino acids; Carbon metabolism	Glycolysis and Gluconeogenesis	6	117.367	16.9989	103.4	9.04294	75.2	11.8373	112.667	9.18214	110.867	2.63332	80.5667	10.3975	0.881	0.640727	0.984024	0.715089			137.2	97.3
FALSE	High	Master Protein	P11142	Heat shock cognate 71 kDa protein OS=Homo sapiens GN=HSPA8 PE=1 SV=1	0	361.907	66	38	394	29	1	646	70.9	5.52	79773.6	554.85	38	37	cell communication;cell organization and biogenesis;metabolic process;regulation of biological process;response to stimulus;transport	cytoplasm;cytosol;endosome;extracellular;membrane;nucleus;organelle lumen;spliceosomal complex	catalytic activity;nucleotide binding;protein binding;RNA binding	Pf00012, Pf02463, Pf06723	3312	ENSG00000109971.13	HSPA8	11	Estrogen signaling pathway; Toxoplasmosis; Spliceosome; Endocytosis; Legionellosis; Measles; MAPK signaling pathway; Longevity regulating pathway - multiple species; Antigen processing and presentation; Influenza A; Protein processing in endoplasmic reticulum; Epstein-Barr virus infection	Parkin-Ubiquitin Proteasomal System pathway; MAPK Signaling Pathway; Exercise-induced Circadian Regulation	6	121.933	4.46294	95.9667	10.9737	87.8667	12.7376	104.933	16.2713	100.667	10.6645	88.6667	9.34004	0.787042	0.720612	0.959339	0.844981			118.4	119.2
FALSE	High	Master Protein	P49327	Fatty acid synthase OS=Homo sapiens GN=FASN PE=1 SV=3	0	359.987	35	66	274	66	1	2511	273.3	6.44	47267.4	285.6	65	64	cell differentiation;metabolic process;regulation of biological process;response to stimulus	cytoplasm;cytosol;Golgi;membrane;mitochondrion	catalytic activity;nucleotide binding;protein binding;RNA binding	Pf00106, Pf00107, Pf00108, Pf00109, Pf00698, Pf00975, Pf02801, Pf08242, Pf08659, Pf13602, Pf14765	2194	ENSG00000169710.8	FASN	17	Metabolic pathways; Fatty acid biosynthesis; Fatty acid metabolism; AMPK signaling pathway; Insulin signaling pathway	SREBF and miR33 in cholesterol and lipid homeostasis; Angiopoietin Like Protein 8 Regulatory Pathway; AMP-activated Protein Kinase (AMPK) Signaling; Liver X Receptor Pathway; Fatty Acid Biosynthesis; Sterol Regulatory Element-Binding Proteins (SREBP) signalling	0	141.267	16.9452	96	5.34	87.5667	15.3304	96.9	12.0708	95.9333	12.1439	82.2333	8.63682	0.679566	0.619868	0.990024	0.848641			160.9	114.6
FALSE	High	Master Protein	Q9P2J5	Leucine--tRNA ligase, cytoplasmic OS=Homo sapiens GN=LARS PE=1 SV=2	0	340.071	43	47	319	47	1	1176	134.4	7.3	55802.1	379.98	46	47	cell communication;cell organization and biogenesis;metabolic process;regulation of biological process;response to stimulus;transport	cytoplasm;cytosol;endoplasmic reticulum;vacuole	catalytic activity;enzyme regulator activity;nucleotide binding;protein binding	Pf00133, Pf01406, Pf08264, Pf09334	51520	ENSG00000133706.17	LARS	5	Aminoacyl-tRNA biosynthesis		0	159.7	23.9196	68.7	32.1313	69.7333	16.8127	154.4	11.7167	87.6667	9.93924	59.7333	12.0656	0.430182	0.436652	0.567789	0.386874			119.7	163.6
FALSE	High	Master Protein	P60709	Actin, cytoplasmic 1 OS=Homo sapiens GN=ACTB PE=1 SV=1	0	331.012	67	20	518	8	1	375	41.7	5.48	99876.6	654.9	20	20	cell organization and biogenesis;cellular component movement;metabolic process;regulation of biological process;response to stimulus	cytoplasm;cytoskeleton;cytosol;membrane;nucleus	DNA binding;nucleotide binding;protein binding;structural molecule activity	Pf00022	60	ENSG00000075624.13	ACTB	7	Pathogenic Escherichia coli infection; Adherens junction; Focal adhesion; Hypertrophic cardiomyopathy (HCM); Thyroid hormone signaling pathway; Vibrio cholerae infection; Hippo signaling pathway; Leukocyte transendothelial migration; Tight junction; Salmonella infection; Platelet activation; Apoptosis; Viral myocarditis; Oxytocin signaling pathway; Gastric acid secretion; Dilated cardiomyopathy; …	Pathogenic Escherichia coli infection; Fas Ligand (FasL) pathway and Stress induction of Heat Shock Proteins (HSP) regulation; Myometrial Relaxation and Contraction Pathways; Common Pathways Underlying Drug Addiction; Arrhythmogenic Right Ventricular Cardiomyopathy; Focal Adhesion; Regulation of Actin Cytoskeleton	22	125.833	18.2154	100.4	5.73293	71.5333	18.1057	126.3	12.7936	107.433	6.30024	68.6	16.1064	0.797881	0.568477	0.85062	0.543151			146.7	101.3
FALSE	High	Master Protein	P07814	Bifunctional glutamate/proline--tRNA ligase OS=Homo sapiens GN=EPRS PE=1 SV=5	0	324.8	40	54	271	53	1	1512	170.5	7.33	47782.1	315.41	53	53	cell organization and biogenesis;metabolic process;regulation of biological process;response to stimulus	cytoplasm;cytosol;membrane	catalytic activity;metal ion binding;nucleotide binding;protein binding;RNA binding	Pf00458, Pf00587, Pf00749, Pf01406, Pf03129, Pf03950, Pf09180, Pf14497	2058	ENSG00000136628.17	EPRS	1	Porphyrin and chlorophyll metabolism; Aminoacyl-tRNA biosynthesis; Metabolic pathways	Parkinsons Disease Pathway; Amino Acid metabolism	1	167.767	22.4913	65.1	33.2405	71.0667	22.1351	140.833	19.0705	91.6333	12.2889	63.6333	11.6295	0.388039	0.423604	0.650651	0.451834			124.3	192.1
FALSE	High	Master Protein	P17987	T-complex protein 1 subunit alpha OS=Homo sapiens GN=TCP1 PE=1 SV=1	0	308.256	65	29	290	29	1	556	60.3	6.11	54099.5	337.6	29	29	cell organization and biogenesis;metabolic process;regulation of biological process;response to stimulus;transport	cytoplasm;cytoskeleton;cytosol;Golgi	nucleotide binding;protein binding;RNA binding	Pf00118	6950	ENSG00000120438.11	TCP1	6			0	134.067	18.3482	81.8333	21.9226	72.6667	8.0211	145.8	3.56983	88.4333	5.47162	77.1667	9.29198	0.610393	0.542019	0.606539	0.529264			129.3	112.2
FALSE	High	Master Protein	P50991	T-complex protein 1 subunit delta OS=Homo sapiens GN=CCT4 PE=1 SV=4	0	305.618	59	29	289	28	1	539	57.9	7.83	51345.5	359.62	28	29	metabolic process;regulation of biological process;transport	cytoplasm;cytoskeleton;cytosol	nucleotide binding;protein binding;RNA binding	Pf00118	10575	ENSG00000115484.14	CCT4	2			0	121.633	22.9386	84.9333	18.9748	73.7333	6.19184	143.167	19.3561	93.8333	22.8761	82.6667	2.48008	0.698273	0.606193	0.655413	0.577416			110.4	101.1
FALSE	High	Master Protein	P04406	Glyceraldehyde-3-phosphate dehydrogenase OS=Homo sapiens GN=GAPDH PE=1 SV=3	0	294.569	68	22	310	22	1	335	36	8.46	56002.4	387.82	21	22	cell death;cell organization and biogenesis;defense response;metabolic process;regulation of biological process;response to stimulus	cytoplasm;cytoskeleton;cytosol;membrane;nucleus	catalytic activity;enzyme regulator activity;nucleotide binding;protein binding	Pf00044, Pf02800	2597	ENSG00000111640.14	GAPDH	12	HIF-1 signaling pathway; Biosynthesis of amino acids; Carbon metabolism; Glycolysis / Gluconeogenesis; Metabolic pathways; Alzheimer's disease	Cori Cycle; Glycolysis and Gluconeogenesis; Alzheimers Disease; Sudden Infant Death Syndrome (SIDS) Susceptibility Pathways	0	104.6	11.2161	107	10.9613	86.3	13.1409	98.7	12.9127	114.833	3.36857	88.5333	8.33117	1.02294	0.825048	1.16346	0.896994			115.8	92.4
FALSE	High	Master Protein	P35580-4	Isoform 4 of Myosin-10 OS=Homo sapiens GN=MYH10	0	293.213	30	53	230	41	1	2007	232.4	5.55	39822.6	277.95	53	50	cell organization and biogenesis;cellular component movement;metabolic process;regulation of biological process;transport	cytoplasm;cytosol;nucleus	catalytic activity;motor activity;nucleotide binding;protein binding;transporter activity	Pf00063, Pf00769, Pf01496, Pf01576, Pf02736, Pf04111, Pf05622, Pf05911, Pf06637, Pf07888, Pf09726, Pf12128, Pf13094, Pf13514	4628	ENSG00000133026.12	MYH10	17		Regulation of Actin Cytoskeleton	0	116.267	28.1633	69.8	19.8086	83.5333	7.32338	156.367	6.4773	104.3	8.38638	69.7667	17.2135	0.600344	0.718463	0.667022	0.446174			87.5	109.4
FALSE	High	Master Protein	Q13885	Tubulin beta-2A chain OS=Homo sapiens GN=TUBB2A PE=1 SV=1	0	287.452	57	23	295	2	1	445	49.9	4.89	48429.7	366.2	23	23	cell organization and biogenesis	cytoplasm;cytoskeleton;nucleus	catalytic activity;nucleotide binding;protein binding;structural molecule activity	Pf00091, Pf03953, Pf10644	7280	ENSG00000137267.5	TUBB2A	6	Pathogenic Escherichia coli infection; Gap junction; Phagosome	Parkin-Ubiquitin Proteasomal System pathway; Pathogenic Escherichia coli infection	3	95.4333	12.6362	77.0333	32.5823	92.7667	12.6382	116.867	37.9475	123.433	29.2227	94.4333	5.99624	0.807195	0.972057	1.05619	0.808043			89.6	87.4
FALSE	High	Master Protein	P78371	T-complex protein 1 subunit beta OS=Homo sapiens GN=CCT2 PE=1 SV=4	0	283.706	70	31	226	31	1	535	57.5	6.46	43400.9	272.71	29	31	cell organization and biogenesis;metabolic process;regulation of biological process;transport	cytoplasm;cytosol;extracellular;organelle lumen	nucleotide binding;protein binding	Pf00118	10576	ENSG00000166226.12	CCT2	12			0	127.233	23.3074	78.9667	22.7924	82.2333	13.9567	133.133	9.28374	93.5	5.55841	84.9333	12.1821	0.620644	0.646319	0.702303	0.637957			113.2	107.2
FALSE	High	Master Protein	P50990	T-complex protein 1 subunit theta OS=Homo sapiens GN=CCT8 PE=1 SV=4	0	282.795	68	38	269	38	1	548	59.6	5.6	48168.9	321.26	38	38	cell organization and biogenesis;metabolic process;regulation of biological process;transport	cytoplasm;cytoskeleton;cytosol;extracellular;organelle lumen	catalytic activity;nucleotide binding;protein binding	Pf00118	10694	ENSG00000156261.12	CCT8	21			0	123.4	10.7459	83.8	10.7716	80.6667	8.61756	134.033	3.60624	90.3	4.0417	87.8	4.36829	0.679092	0.653701	0.673713	0.655061			117.4	114.2
FALSE	High	Master Protein	P39023	60S ribosomal protein L3 OS=Homo sapiens GN=RPL3 PE=1 SV=2	0	277.353	58	35	270	35	1	403	46.1	10.18	47445.9	297.67	34	33	cell organization and biogenesis;metabolic process;response to stimulus;transport	cytoplasm;cytosol;nucleus;ribosome	protein binding;RNA binding;structural molecule activity	Pf00297	6122	ENSG00000100316.15	RPL3	22	Ribosome	Cytoplasmic Ribosomal Proteins	0	52	27.2012	79.4667	21.577	139.633	1.49253	70.7	19.9153	94	21.7825	164.2	1.99678	1.52821	2.68526	1.32956	2.32249			35.8	58.3
FALSE	High	Master Protein	P07900-2	Isoform 2 of Heat shock protein HSP 90-alpha OS=Homo sapiens GN=HSP90AA1	0	275.068	43	38	288	25	1	854	98.1	5.16	50142.9	295.96	38	36	cell organization and biogenesis;metabolic process;regulation of biological process;response to stimulus;transport	cytoplasm;cytosol;extracellular;membrane;nucleus;organelle lumen	catalytic activity;enzyme regulator activity;nucleotide binding;protein binding;RNA binding	Pf00183, Pf02518, Pf13589	3320	ENSG00000080824.18	HSP90AA1	14		Aryl Hydrocarbon Receptor Pathway; Constitutive Androstane Receptor Pathway; Corticotropin-releasing hormone signaling pathway; TNF alpha Signaling Pathway; NRF2 pathway; Nucleotide-binding Oligomerization Domain (NOD) pathway; VEGFA-VEGFR2 Signaling Pathway; Aryl Hydrocarbon Receptor; EBV LMP1 signaling; Focal Adhesion-PI3K-Akt-mTOR-signaling pathway	16	114.167	7.20399	98.8	9.31999	83.3	8.0959	110.567	15.9525	98.6333	15.8254	94.5	12.6192	0.865401	0.729635	0.892071	0.854688			123.6	108.5
FALSE	High	Master Protein	P09874	Poly [ADP-ribose] polymerase 1 OS=Homo sapiens GN=PARP1 PE=1 SV=4	0	274.893	46	49	250	49	1	1014	113	8.88	43200.8	294.93	49	49	cell death;cell differentiation;cell organization and biogenesis;metabolic process;regulation of biological process;response to stimulus	membrane;mitochondrion;nucleus	catalytic activity;DNA binding;metal ion binding;nucleotide binding;protein binding;RNA binding	Pf00533, Pf00644, Pf00645, Pf02877, Pf05406, Pf08063	142	ENSG00000143799.12	PARP1	1	Apoptosis; NF-kappa B signaling pathway; Base excision repair	Fas Ligand (FasL) pathway and Stress induction of Heat Shock Proteins (HSP) regulation; NAD+ metabolism; Nanoparticle triggered regulated necrosis; Corticotropin-releasing hormone signaling pathway; NAD+ biosynthetic pathways; NAD metabolism, sirtuins and aging	0	108.967	11.9969	93.2	8.64517	86.7667	11.9686	107.3	11.5153	112.8	4.78805	90.9	6.5009	0.855307	0.796268	1.05126	0.847158			115.7	93.9
FALSE	High	Master Protein	P68363	Tubulin alpha-1B chain OS=Homo sapiens GN=TUBA1B PE=1 SV=1	0	271.169	63	25	306	3	1	451	50.1	5.06	56127.8	400.85	25	25	cell division;cell organization and biogenesis;response to stimulus;transport	cytoplasm;cytoskeleton;membrane	catalytic activity;nucleotide binding;protein binding;RNA binding;structural molecule activity	Pf00091, Pf03953	10376	ENSG00000123416.15	TUBA1B	12	Pathogenic Escherichia coli infection; Phagosome; Apoptosis; Gap junction	Parkin-Ubiquitin Proteasomal System pathway; Allograft Rejection; Pathogenic Escherichia coli infection	27	109.033	32.0517	96.3333	10.9526	78.2	17.4387	137.333	50.3976	94.8667	17.2843	84.2	9.96422	0.883522	0.717212	0.690777	0.613107			68.7	128.1
FALSE	High	Master Protein	P14618	Pyruvate kinase PKM OS=Homo sapiens GN=PKM PE=1 SV=4	0	265.502	67	32	263	32	1	531	57.9	7.84	49625.9	291.57	32	30	cell death;cell organization and biogenesis;metabolic process;response to stimulus;transport	cytoplasm;cytosol;extracellular;mitochondrion;nucleus;organelle lumen	catalytic activity;metal ion binding;nucleotide binding;protein binding;RNA binding	Pf00224, Pf02887	5315	ENSG00000067225.17	PKM	15	Glucagon signaling pathway; Purine metabolism; Viral carcinogenesis; Glycolysis / Gluconeogenesis; Pyruvate metabolism; Central carbon metabolism in cancer; Metabolic pathways; Biosynthesis of amino acids; Type II diabetes mellitus; Carbon metabolism	Glycolysis and Gluconeogenesis; Photodynamic therapy-induced HIF-1 survival signaling; Amino Acid metabolism	0	102.933	19.3259	95.7	2.71481	73.2667	13.516	130.167	19.4975	109.4	11.3124	88.5	6.55659	0.929728	0.711788	0.840461	0.679898			91.1	91.8
FALSE	High	Master Protein	P08238	Heat shock protein HSP 90-beta OS=Homo sapiens GN=HSP90AB1 PE=1 SV=4	0	264.423	57	37	282	22	1	724	83.2	5.03	48244.5	289.32	36	35	cell organization and biogenesis;metabolic process;regulation of biological process;response to stimulus;transport	cell surface;cytoplasm;cytosol;extracellular;membrane;mitochondrion;nucleus;organelle lumen	enzyme regulator activity;nucleotide binding;protein binding;RNA binding	Pf00183, Pf02518, Pf13589	3326	ENSG00000096384.19	HSP90AB1	6	PI3K-Akt signaling pathway; Prostate cancer; NOD-like receptor signaling pathway; Estrogen signaling pathway; Pathways in cancer; Antigen processing and presentation; Protein processing in endoplasmic reticulum; Progesterone-mediated oocyte maturation	NRF2 pathway; Focal Adhesion-PI3K-Akt-mTOR-signaling pathway	1	114.9	3.54916	108.167	1.62862	86.1667	6.98771	109.7	15.9984	90.2667	15.9867	90.8	9.53264	0.941398	0.749927	0.82285	0.827712			117	110.2
FALSE	High	Master Protein	P11940	Polyadenylate-binding protein 1 OS=Homo sapiens GN=PABPC1 PE=1 SV=2	0	263.675	57	31	298	21	1	636	70.6	9.5	54024.2	380.67	30	31	metabolic process;regulation of biological process	cytoplasm;cytosol;membrane;nucleus;spliceosomal complex	protein binding;RNA binding;translation regulator activity	Pf00076, Pf00658, Pf13893, Pf14259	26986	ENSG00000070756.15	PABPC1	8	RNA transport; mRNA surveillance pathway; RNA degradation	Endoderm Differentiation; Translation Factors	15	29.5667	29.5517	121.1	5.7145	160.1	16.3565	30.8	27.1507	100.1	14.2773	158.367	8.62666	4.09583	5.41488	3.25	5.14177			30.5	37.8
FALSE	High	Master Protein	Q99832	T-complex protein 1 subunit eta OS=Homo sapiens GN=CCT7 PE=1 SV=2	0	263.343	55	28	237	28	1	543	59.3	7.65	44580.8	339.46	28	28	metabolic process;regulation of biological process;transport	cytoplasm;cytosol;mitochondrion	nucleotide binding;protein binding	Pf00118	10574	ENSG00000135624.15	CCT7	2			0	134.633	12.073	97.1667	4.0247	73.9667	3.64361	133.167	11.6151	82.6667	17.1511	78.3667	12.6595	0.721713	0.549393	0.620776	0.588486			142	116
FALSE	High	Master Protein	P54136	Arginine--tRNA ligase, cytoplasmic OS=Homo sapiens GN=RARS PE=1 SV=2	0	263.217	53	34	239	34	1	660	75.3	6.68	40127.4	282.14	34	34	metabolic process	cytoplasm;cytosol;membrane;mitochondrion;nucleus	catalytic activity;nucleotide binding;protein binding;RNA binding	Pf00750, Pf03485, Pf05746	5917	ENSG00000113643.8	RARS	5	Aminoacyl-tRNA biosynthesis	Amino Acid metabolism	0	152.7	22.4606	74	34.5716	74.4333	17.0767	140.067	11.1883	90.1	7.43618	68.7667	10.6626	0.48461	0.487448	0.643265	0.490957			114.8	161.7
FALSE	High	Master Protein	P55072	Transitional endoplasmic reticulum ATPase OS=Homo sapiens GN=VCP PE=1 SV=4	0	261.722	57	39	209	39	1	806	89.3	5.26	37441.6	223.61	38	38	cell communication;cell organization and biogenesis;metabolic process;regulation of biological process;response to stimulus;transport	cytoplasm;cytosol;endoplasmic reticulum;extracellular;membrane;nucleus;organelle lumen;proteasome	catalytic activity;enzyme regulator activity;nucleotide binding;protein binding;RNA binding	Pf00004, Pf00910, Pf01057, Pf01078, Pf02359, Pf02933, Pf05496, Pf05673, Pf06068, Pf07724, Pf07726, Pf07728, Pf09336, Pf13191, Pf13207, Pf13401	7415	ENSG00000165280.15	VCP	9	Protein processing in endoplasmic reticulum; Legionellosis		0	133.333	14.3747	89.5667	8.24715	84.2667	4.85585	112.6	5.48253	95.5333	7.67017	84.7333	8.47454	0.67175	0.632	0.848431	0.752516			149.1	112
FALSE	High	Master Protein	P63244	Receptor of activated protein C kinase 1 OS=Homo sapiens GN=RACK1 PE=1 SV=3	0	259.966	91	25	369	25	1	317	35.1	7.69	63375.3	443.01	25	25	cell death;cellular homeostasis;development;metabolic process;regulation of biological process;response to stimulus	cytoplasm;cytosol;membrane;mitochondrion;nucleus;ribosome	enzyme regulator activity;protein binding;RNA binding;structural molecule activity	Pf00400	10399	ENSG00000204628.11	GNB2L1; RACK1	5	Measles	Brain-Derived Neurotrophic Factor (BDNF) signaling pathway; Androgen receptor signaling pathway; VEGFA-VEGFR2 Signaling Pathway; Interferon type I signaling pathways	0	74.0667	35.0438	67.0667	12.1082	133.833	11.3272	104	35.8683	71.7667	6.57465	149.3	11.3421	0.905491	1.80693	0.690064	1.43558			47.8	99.7
FALSE	High	Master Protein	P41252	Isoleucine--tRNA ligase, cytoplasmic OS=Homo sapiens GN=IARS PE=1 SV=2	0	257.821	41	49	245	49	1	1262	144.4	6.15	39157.6	240.95	48	48	cell differentiation;metabolic process;regulation of biological process	cytoplasm;cytosol;membrane	catalytic activity;nucleotide binding;protein binding;RNA binding	Pf00133, Pf01406, Pf08264, Pf09334	3376	ENSG00000196305.17	IARS	9	Aminoacyl-tRNA biosynthesis	Amino Acid metabolism	0	154.7	38.5696	73.9	47.0232	73.7	27.1034	159.433	20.2795	77.1	20.0044	61.2	5.9903	0.477699	0.476406	0.483588	0.38386			88	173.1
FALSE	High	Master Protein	P49368	T-complex protein 1 subunit gamma OS=Homo sapiens GN=CCT3 PE=1 SV=4	0	256.84	59	33	225	33	1	545	60.5	6.49	39324.6	252.16	32	32	cell organization and biogenesis;metabolic process;regulation of biological process;transport	cytoplasm;cytoskeleton;cytosol;membrane	nucleotide binding;protein binding;RNA binding	Pf00118	7203	ENSG00000163468.14	CCT3	1			0	123.9	17.8461	82.4	13.3225	80.5333	8.09154	129.1	3.51908	93.6	3.82383	90.5	1.33971	0.665052	0.649987	0.725019	0.701007			115.4	107.3
FALSE	High	Master Protein	P48643	T-complex protein 1 subunit epsilon OS=Homo sapiens GN=CCT5 PE=1 SV=1	0	250.997	67	35	258	34	1	541	59.6	5.66	46229.3	300.68	35	34	metabolic process;regulation of biological process;response to stimulus;transport	cytoplasm;cytoskeleton;cytosol	nucleotide binding;protein binding;RNA binding	Pf00118	22948	ENSG00000150753.11	CCT5	5			1	132.267	17.239	83.5667	13.1044	75.8667	3.78672	140.6	9.91992	87	5.6882	80.7667	8.77446	0.631804	0.573589	0.618777	0.574443			130.5	110.4
FALSE	High	Master Protein	Q9BQE3	Tubulin alpha-1C chain OS=Homo sapiens GN=TUBA1C PE=1 SV=1	0	244.708	63	25	269	3	1	449	49.9	5.1	48002	331.61	25	25	cell division;cell organization and biogenesis;transport	cytoplasm;cytoskeleton;nucleus	catalytic activity;nucleotide binding;protein binding;structural molecule activity	Pf00091, Pf03953	84790	ENSG00000167553.15	TUBA1C	12	Phagosome; Pathogenic Escherichia coli infection; Apoptosis; Gap junction	Parkin-Ubiquitin Proteasomal System pathway; Pathogenic Escherichia coli infection	0	116.167	34.9545	80.9667	16.5727	77.2667	20.8848	155.333	51.55	97.2	29.0173	73.0333	17.0602	0.696987	0.665136	0.625751	0.470172			69.3	138.4
FALSE	High	Master Protein	P31948-2	Isoform 2 of Stress-induced-phosphoprotein 1 OS=Homo sapiens GN=STIP1	0	243.508	51	39	275	39	1	590	68	7.74	46447.6	332.69	37	38	response to stimulus	cytosol;Golgi;nucleus	protein binding;RNA binding	Pf00515, Pf12895, Pf13414, Pf13424, Pf13432, Pf14559	10963	ENSG00000168439.16	STIP1	11			0	145.633	32.7035	130.433	24.9649	60.5	41.3907	104.5	15.0239	100.433	32.5305	58.4667	33.4134	0.895628	0.415427	0.961085	0.55949			176.7	90.8
FALSE	High	Master Protein	Q6P2Q9	Pre-mRNA-processing-splicing factor 8 OS=Homo sapiens GN=PRPF8 PE=1 SV=2	0	241.99	27	51	195	51	1	2335	273.4	8.84	31639.8	197.89	50	51	cell organization and biogenesis;metabolic process;response to stimulus	membrane;nucleus;spliceosomal complex	catalytic activity;protein binding;RNA binding	Pf01398, Pf08082, Pf08083, Pf08084, Pf10596, Pf10597, Pf10598, Pf12134	10594	ENSG00000174231.16; ENSG00000274442.2	PRPF8	17; CHR_HSCHR17_1_CTG2	Spliceosome	mRNA Processing	0	82.5333	11.1749	97.7	0.511771	104.733	7.43912	90.0333	28.8663	108.167	15.1675	116.833	6.29688	1.18376	1.26898	1.20141	1.29767			74.3	80.8
FALSE	High	Master Protein	P05388	60S acidic ribosomal protein P0 OS=Homo sapiens GN=RPLP0 PE=1 SV=1	0	238.734	66	22	419	22	1	317	34.3	5.97	83644.4	566.54	22	22	cell organization and biogenesis;metabolic process;regulation of biological process;response to stimulus;transport	cytoplasm;cytosol;endoplasmic reticulum;membrane;nucleus;ribosome	protein binding;RNA binding;structural molecule activity	Pf00428, Pf00466	6175	ENSG00000089157.15	RPLP0	12	Ribosome	Cytoplasmic Ribosomal Proteins	0	44.1333	25.1677	94.0333	21.9948	132.867	17.2669	80.1	34.005	75.7333	10.9207	173.167	5.37314	2.13066	3.01057	0.945485	2.16188			32	53.8
FALSE	High	Master Protein	P40227	T-complex protein 1 subunit zeta OS=Homo sapiens GN=CCT6A PE=1 SV=3	0	230.512	62	32	264	32	1	531	58	6.68	51986.1	334.12	32	32	metabolic process;regulation of biological process	cytoplasm;cytosol;membrane	nucleotide binding;protein binding;RNA binding	Pf00118, Pf05504	908	ENSG00000146731.10	CCT6A	7			0	127.867	15.22	82.7	10.5165	71.9	3.32345	144.267	5.1361	84.3	4.52174	89.0333	11.0599	0.646767	0.562304	0.584335	0.617144			127.1	108.8
FALSE	High	Master Protein	P13797	Plastin-3 OS=Homo sapiens GN=PLS3 PE=1 SV=4	0	228.848	57	34	230	29	1	630	70.8	5.6	38663.1	220.88	34	32	cell organization and biogenesis	cytoplasm;cytosol;membrane	metal ion binding;protein binding	Pf00036, Pf00307, Pf13499	5358	ENSG00000102024.17	PLS3	X			6	114	16.7872	116.9	15.0301	79.5	8.67195	126.433	9.92936	84.5	22.7019	78.6667	7.9226	1.02544	0.697368	0.668336	0.622199			98	108.8
FALSE	High	Master Protein	O75643	U5 small nuclear ribonucleoprotein 200 kDa helicase OS=Homo sapiens GN=SNRNP200 PE=1 SV=2	0	219.679	26	46	171	46	1	2136	244.4	6.06	26343.3	202.94	40	46	cell differentiation;cell organization and biogenesis;metabolic process	membrane;nucleus;spliceosomal complex	catalytic activity;DNA binding;nucleotide binding;protein binding;RNA binding	Pf00270, Pf00271, Pf02889, Pf04851	23020	ENSG00000144028.14	SNRNP200	2	Spliceosome		0	88	5.82546	108.967	9.92502	103.6	11.6364	84.9	29.984	110.2	4.16534	104.333	19.669	1.23826	1.17727	1.298	1.2289			92.8	88.6
FALSE	High	Master Protein	P68104	Elongation factor 1-alpha 1 OS=Homo sapiens GN=EEF1A1 PE=1 SV=1	0	219.604	65	22	239	14	1	462	50.1	9.01	43487	288.16	22	22	metabolic process;regulation of biological process;response to stimulus;transport	cytoplasm;cytoskeleton;cytosol;extracellular;membrane;nucleus;organelle lumen	catalytic activity;nucleotide binding;protein binding;RNA binding	Pf00009, Pf03143, Pf03144	1915	ENSG00000156508.17	EEF1A1	6	Legionellosis; RNA transport	Translation Factors	7	125.867	6.05605	118.733	9.39158	79.2333	20.4842	109.3	21.6135	93.1667	15.567	73.7667	8.15782	0.943326	0.629502	0.852394	0.674901			117.3	128.4
FALSE	High	Master Protein	P60174	Triosephosphate isomerase OS=Homo sapiens GN=TPI1 PE=1 SV=3	0	218.275	75	18	263	18	1	286	30.8	5.92	50339.3	365.95	18	18	development;metabolic process	cytosol;nucleus	catalytic activity;protein binding	Pf00121	7167	ENSG00000111669.14	TPI1	12	Biosynthesis of amino acids; Carbon metabolism; Fructose and mannose metabolism; Metabolic pathways; Glycolysis / Gluconeogenesis; Inositol phosphate metabolism	Cori Cycle; Fatty Acid Beta Oxidation; Glycolysis and Gluconeogenesis	0	121.5	12.5306	99.1	13.0398	69.4333	12.8885	127.333	11.9093	104.2	8.80044	78.4667	7.25006	0.815638	0.571468	0.818325	0.61623			137.2	106.8
FALSE	High	Master Protein	P14625	Endoplasmin OS=Homo sapiens GN=HSP90B1 PE=1 SV=1	0	215.849	50	44	208	43	1	803	92.4	4.84	34947.2	206.27	43	43	cell organization and biogenesis;metabolic process;regulation of biological process;response to stimulus;transport	cytosol;endoplasmic reticulum;extracellular;membrane;nucleus;organelle lumen	metal ion binding;nucleotide binding;protein binding;RNA binding	Pf00183, Pf02518, Pf13589	7184	ENSG00000166598.14	HSP90B1	12	Thyroid hormone synthesis; Pathways in cancer; PI3K-Akt signaling pathway; Protein processing in endoplasmic reticulum; Estrogen signaling pathway; Prostate cancer	Sudden Infant Death Syndrome (SIDS) Susceptibility Pathways; Focal Adhesion-PI3K-Akt-mTOR-signaling pathway; Photodynamic therapy-induced unfolded protein response	1	113.733	2.3135	105	3.27569	92.2	14.7585	81.6333	21.2564	100.233	8.25258	107.167	10.2322	0.923212	0.810668	1.22785	1.31278			110.7	115.4
FALSE	High	Master Protein	P36578	60S ribosomal protein L4 OS=Homo sapiens GN=RPL4 PE=1 SV=5	0	215.75	59	30	308	30	1	427	47.7	11.06	57482.1	403.98	30	28	cell organization and biogenesis;metabolic process;transport	cytoplasm;cytosol;endoplasmic reticulum;membrane;nucleus;ribosome	protein binding;RNA binding;structural molecule activity	Pf00573, Pf14374	6124	ENSG00000174444.14	RPL4	15	Ribosome	Cytoplasmic Ribosomal Proteins	0	51.8667	31.5373	75.5667	28.321	143.433	10.3565	66.6	27.0575	108.333	19.8172	154.233	1.93463	1.45694	2.76542	1.62663	2.31582			33.1	63.1
FALSE	High	Master Protein	Q13310-3	Isoform 3 of Polyadenylate-binding protein 4 OS=Homo sapiens GN=PABPC4	0	204.658	49	29	229	19	1	660	72.3	9.35	43334.9	305.59	28	29	coagulation;metabolic process	cytoplasm;cytosol;nucleus	protein binding;RNA binding	Pf00076, Pf00658, Pf13893, Pf14259	8761	ENSG00000090621.13	PABPC4	1			0	33.4667	34.0773	114.7	2.58041	153.233	14.6517	34.3667	23.7827	97.5333	8.84923	166.633	8.27738	3.42729	4.57869	2.83802	4.84869			30.7	46
FALSE	High	Master Protein	P22314	Ubiquitin-like modifier-activating enzyme 1 OS=Homo sapiens GN=UBA1 PE=1 SV=3	0	203.879	37	31	186	31	1	1058	117.8	5.76	33276.7	212.66	30	30	metabolic process;response to stimulus	cytoplasm;cytosol;membrane;mitochondrion;nucleus	catalytic activity;nucleotide binding;protein binding;RNA binding	Pf00899, Pf02134, Pf09358, Pf10585	7317	ENSG00000130985.16	UBA1	X	Ubiquitin mediated proteolysis; Parkinson's disease	Parkin-Ubiquitin Proteasomal System pathway; Parkinsons Disease Pathway; Proteasome Degradation	0	116.767	11.7632	108	2.18918	82.1667	10.9468	101.633	9.17185	104.833	8.54113	86.6	6.32896	0.924921	0.703683	1.03149	0.852083			131.3	104
FALSE	High	Master Protein	P34932	Heat shock 70 kDa protein 4 OS=Homo sapiens GN=HSPA4 PE=1 SV=4	0	201.707	47	32	156	28	1	840	94.3	5.19	26989.9	191.68	30	31	cell organization and biogenesis;response to stimulus;transport	cytoplasm;cytosol	nucleotide binding;protein binding	Pf00012, Pf06723	3308	ENSG00000170606.14	HSPA4	5	Antigen processing and presentation	Parkin-Ubiquitin Proteasomal System pathway	5	118.033	7.8688	86.0667	14.4721	93.8333	14.9582	95.7	27.5894	116.333	8.01058	90.0333	14.117	0.729173	0.794973	1.2156	0.940787			125.4	107.6
FALSE	High	Master Protein	P27708	CAD protein OS=Homo sapiens GN=CAD PE=1 SV=3	0	199.787	19	36	165	36	1	2225	242.8	6.46	29248.9	201.86	36	35	metabolic process	cytoplasm;cytosol;membrane;nucleus	catalytic activity;metal ion binding;nucleotide binding;protein binding	Pf00117, Pf00185, Pf00289, Pf00988, Pf01979, Pf02142, Pf02222, Pf02729, Pf02786, Pf02787, Pf07478, Pf07722, Pf13147, Pf13535, Pf13594, Pf15632	790	ENSG00000084774.13	CAD	2	Pyrimidine metabolism; Alanine, aspartate and glutamate metabolism; Metabolic pathways	Amino Acid metabolism; Endothelin Pathways	0	128.1	28.7721	80.5333	4.09266	83.4	14.9717	146.3	46.6037	87.4	22.8108	74.2667	17.1034	0.628676	0.651054	0.597403	0.507633			87.9	136.1
FALSE	High	Master Protein	P04264	Keratin, type II cytoskeletal 1 OS=Homo sapiens GN=KRT1 PE=1 SV=6	0	195.14	37	29	214	23	1	644	66	8.12	36689.7	182.63	29	28	cell death;defense response;metabolic process;regulation of biological process;response to stimulus;transport	cytoskeleton;cytosol;extracellular;membrane;nucleus	catalytic activity;motor activity;protein binding;receptor activity;structural molecule activity	Pf00038, Pf01576, Pf05103, Pf05957, Pf12128, Pf13166, Pf13514	3848	ENSG00000167768.4	KRT1	12		Corticotropin-releasing hormone signaling pathway	1	53.1667	102.804	110.233	52.5822	139.433	99.4497	57.6667	104.871	144.167	106.431	95.3667	73.0261	2.07335	2.62257	2.5	1.65376			11.3	115
FALSE	High	Master Protein	P06576	ATP synthase subunit beta, mitochondrial OS=Homo sapiens GN=ATP5B PE=1 SV=3	0	194.936	55	20	141	20	1	529	56.5	5.4	25659.3	161.98	20	19	cell differentiation;cell organization and biogenesis;cellular homeostasis;metabolic process;regulation of biological process;transport	cell surface;membrane;mitochondrion;nucleus;organelle lumen	catalytic activity;nucleotide binding;protein binding;transporter activity	Pf00006, Pf00306, Pf02874	506	ENSG00000110955.8	ATP5B	12	Alzheimer's disease; Metabolic pathways; Parkinson's disease; Oxidative phosphorylation; Huntington's disease	Electron Transport Chain; Oxidative phosphorylation	0	113.467	19.0573	102.567	5.10568	81.3667	15.609	120.367	18.5813	100.3	9.89051	82	9.01367	0.903937	0.717098	0.833287	0.681252			93.3	110.8
FALSE	High	Master Protein	P35908	Keratin, type II cytoskeletal 2 epidermal OS=Homo sapiens GN=KRT2 PE=1 SV=2	0	194.555	46	30	215	21	1	639	65.4	8	39150.5	253.24	30	30	cell death;cell organization and biogenesis;cell proliferation;cellular component movement;metabolic process	cytoskeleton;cytosol;membrane;nucleus	protein binding;structural molecule activity	Pf00038, Pf08614, Pf12128, Pf13166	3849	ENSG00000172867.3	KRT2	12			9	66.3667	76.0214	107.733	73.4069	206.433	109.268	55.8667	100.853	73.0667	73.8075	90.5	81.2307	1.6233	3.1105	1.30788	1.61993			63.7	118.1
FALSE	High	Master Protein	P19338	Nucleolin OS=Homo sapiens GN=NCL PE=1 SV=3	0	192.981	40	35	233	35	1	710	76.6	4.7	37845.5	275.55	35	35	regulation of biological process;response to stimulus	cytoplasm;membrane;nucleus	DNA binding;protein binding;RNA binding	Pf00076, Pf13893, Pf14259	4691	ENSG00000115053.15	NCL	2	Pathogenic Escherichia coli infection	Pathogenic Escherichia coli infection; VEGFA-VEGFR2 Signaling Pathway	0	120.9	11.1067	142.867	24.5473	73.6	40.731	96.2	25.478	89.5333	23.4763	76.9	32.0706	1.18169	0.608768	0.9307	0.799376			133.8	121.9
FALSE	High	Master Protein	P23396	40S ribosomal protein S3 OS=Homo sapiens GN=RPS3 PE=1 SV=2	0	190.091	80	23	327	23	1	243	26.7	9.66	56469.5	321.14	23	23	cell death;cell division;cell organization and biogenesis;metabolic process;regulation of biological process;response to stimulus;transport	cytoplasm;cytoskeleton;cytosol;endoplasmic reticulum;membrane;mitochondrion;nucleus;organelle lumen;ribosome	catalytic activity;DNA binding;protein binding;RNA binding;structural molecule activity	Pf00189, Pf07650	6188	ENSG00000149273.14	RPS3	11	Ribosome	Cytoplasmic Ribosomal Proteins	0	61.7333	41.575	69.6	11.0436	134.133	24.4638	103.167	27.0748	75.7333	18.1842	155.567	10.0662	1.12743	2.17279	0.734087	1.50792			36.6	87.9
FALSE	High	Master Protein	P11021	78 kDa glucose-regulated protein OS=Homo sapiens GN=HSPA5 PE=1 SV=2	0	187.771	48	32	179	29	1	654	72.3	5.16	31838	206.82	31	32	cell communication;cell death;cell differentiation;cell organization and biogenesis;metabolic process;regulation of biological process;response to stimulus;transport	cell surface;cytoplasm;endoplasmic reticulum;membrane;mitochondrion;nucleus;organelle lumen	catalytic activity;metal ion binding;nucleotide binding;protein binding	Pf00012, Pf01968, Pf06723	3309	ENSG00000044574.7	HSPA5	9	Antigen processing and presentation; Protein export; Thyroid hormone synthesis; Prion diseases; Protein processing in endoplasmic reticulum	Parkin-Ubiquitin Proteasomal System pathway; Apoptosis-related network due to altered Notch3 in ovarian cancer; MAPK Signaling Pathway; Photodynamic therapy-induced unfolded protein response	0	137.667	3.20794	86.4667	23.4805	98.1667	18.4243	87.9	26.5878	106.667	16.8891	83.1	18.2979	0.628087	0.713075	1.2135	0.945392			139.7	132.6
FALSE	High	Master Protein	P62424	60S ribosomal protein L7a OS=Homo sapiens GN=RPL7A PE=1 SV=2	0	186.487	59	24	217	24	1	266	30	10.61	43144.3	256.44	24	24	cell organization and biogenesis;metabolic process;transport	cytoplasm;cytosol;membrane;nucleus;ribosome	protein binding;RNA binding;structural molecule activity	Pf01248	6130	ENSG00000280858.2; ENSG00000148303.16	RPL7A	9; CHR_HG2030_PATCH	Ribosome	Cytoplasmic Ribosomal Proteins	0	50.6667	32.9613	87.7	31.2626	139.367	9.35776	66.5667	24.7996	109.067	27.4557	146.633	11.3798	1.73092	2.75066	1.63846	2.2028			31.6	62.7
FALSE	High	Master Protein	P00558	Phosphoglycerate kinase 1 OS=Homo sapiens GN=PGK1 PE=1 SV=3	0	184.426	76	30	177	30	1	417	44.6	8.1	29174.6	196.09	30	30	cell differentiation;metabolic process;regulation of biological process;response to stimulus	cytoplasm;cytosol;membrane	catalytic activity;nucleotide binding;protein binding	Pf00162	5230	ENSG00000102144.13	PGK1	X	Glycolysis / Gluconeogenesis; Metabolic pathways; Carbon metabolism; Biosynthesis of amino acids; HIF-1 signaling pathway	Cori Cycle; Glycolysis and Gluconeogenesis; Photodynamic therapy-induced HIF-1 survival signaling	0	93.1667	15.3816	83.1	12.2714	69.7333	22.361	152.733	18.138	112.233	10.4564	89.0667	2.67897	0.89195	0.748479	0.734832	0.583151			77.4	96.7
FALSE	High	Master Protein	P18124	60S ribosomal protein L7 OS=Homo sapiens GN=RPL7 PE=1 SV=1	0	183.561	52	20	359	20	1	248	29.2	10.65	59427	412.19	20	20	cell organization and biogenesis;metabolic process;transport	cytoplasm;cytosol;membrane;nucleus;ribosome	DNA binding;protein binding;RNA binding;structural molecule activity	Pf00327, Pf08079	6129	ENSG00000147604.13	RPL7	8	Ribosome	Cytoplasmic Ribosomal Proteins	0	50.5333	31.3792	95.9667	23.8423	133.6	10.6074	79.7667	8.51133	90.7	13.2483	149.467	11.5738	1.89908	2.6438	1.13707	1.8738			32.6	62.7
FALSE	High	Master Protein	P15880	40S ribosomal protein S2 OS=Homo sapiens GN=RPS2 PE=1 SV=2	0	183.124	55	20	326	20	1	293	31.3	10.24	60988.8	423.03	20	20	cell organization and biogenesis;metabolic process;regulation of biological process;transport	cytosol;membrane;nucleus;ribosome	protein binding;RNA binding;structural molecule activity	Pf00333, Pf03719	6187	ENSG00000140988.15	RPS2	16	Ribosome	Cytoplasmic Ribosomal Proteins	0	65	30.3919	62.6667	15.5045	138.4	10.195	96.2667	15.1869	84.1333	17.5414	153.567	13.087	0.964103	2.12923	0.873961	1.59522			45.5	85
FALSE	High	Master Protein	P05387	60S acidic ribosomal protein P2 OS=Homo sapiens GN=RPLP2 PE=1 SV=1	0	182.673	81	12	256	12	1	115	11.7	4.54	51207	367.42	12	12	cell organization and biogenesis;metabolic process;transport	cytosol;membrane;ribosome	protein binding;structural molecule activity	Pf00428	6181	ENSG00000177600.8	RPLP2	11	Ribosome	Cytoplasmic Ribosomal Proteins	0	67.1	14.2331	132.6	4.56493	110.767	24.559	66.9	20.125	111.4	30.7735	111.267	14.1512	1.97615	1.65077	1.66517	1.66318			71.1	56.2
FALSE	High	Master Protein	P53396	ATP-citrate synthase OS=Homo sapiens GN=ACLY PE=1 SV=3	0	181.982	35	32	151	32	1	1101	120.8	7.33	27664.8	178.85	31	32	metabolic process;regulation of biological process;transport	cytoplasm;cytosol;extracellular;membrane;organelle lumen	catalytic activity;metal ion binding;nucleotide binding;protein binding	Pf00285, Pf00549, Pf02629, Pf08442	47	ENSG00000131473.16	ACLY	17	Metabolic pathways; Citrate cycle (TCA cycle)	Amino Acid metabolism; Sterol Regulatory Element-Binding Proteins (SREBP) signalling; Fatty Acid Biosynthesis; TCA Cycle and Deficiency of Pyruvate Dehydrogenase complex (PDHc)	0	126.367	8.97206	91.2667	11.5154	88.7667	10.1398	112.033	10.0393	96.3333	5.70871	85.2333	11.3638	0.722237	0.702453	0.859863	0.760785			132.2	113.3
FALSE	High	Master Protein	P62917	60S ribosomal protein L8 OS=Homo sapiens GN=RPL8 PE=1 SV=2	0	181.361	51	14	124	14	1	257	28	11.03	24905.1	159.54	14	14	cell organization and biogenesis;metabolic process;response to stimulus;transport	cytoplasm;cytosol;membrane;ribosome	RNA binding;structural molecule activity	Pf00181, Pf03947	6132	ENSG00000161016.17	RPL8	8	Ribosome	Cytoplasmic Ribosomal Proteins	0	52.5	16.311	76.3	31.7323	135.467	16.9368	58.4	34.4638	136.233	32.0524	141.133	7.84488	1.45333	2.58032	2.33276	2.41667			44.6	51.3
FALSE	High	Master Protein	P60842	Eukaryotic initiation factor 4A-I OS=Homo sapiens GN=EIF4A1 PE=1 SV=1	0	178.866	50	21	182	10	1	406	46.1	5.48	30809.9	185.95	21	21	metabolic process;regulation of biological process	cytoplasm;cytosol;membrane;nucleus	catalytic activity;DNA binding;nucleotide binding;protein binding;RNA binding	Pf00270, Pf00271, Pf04851	1973	ENSG00000161960.14	EIF4A1	17	RNA transport	Translation Factors; Interferon type I signaling pathways	13	107.967	5.79037	120.7	11.5685	87.4333	5.12811	109.233	13.2099	90.6333	9.77962	84	10.0643	1.11794	0.809818	0.829722	0.768996			101.8	107.8
FALSE	High	Master Protein	P05787-2	Isoform 2 of Keratin, type II cytoskeletal 8 OS=Homo sapiens GN=KRT8	0	177.454	50	30	199	22	1	511	56.6	5.43	32573.5	171.82	30	29	cell death;cell differentiation;cell organization and biogenesis;regulation of biological process;response to stimulus	cytoplasm;cytoskeleton;cytosol;membrane;nucleus	catalytic activity;motor activity;protein binding;structural molecule activity	Pf00038, Pf01576, Pf06637, Pf13166, Pf13514, Pf15003	3856	ENSG00000170421.12	KRT8	12		Primary Focal Segmental Glomerulosclerosis FSGS	6	156.633	39.0532	130.867	12.437	115.367	13.9392	54.6	55.9976	77.2	29.9251	65.4	23.0826	0.835497	0.73654	1.41392	1.1978			227.1	125.6
FALSE	High	Master Protein	P08865	40S ribosomal protein SA OS=Homo sapiens GN=RPSA PE=1 SV=4	0	174.173	52	13	206	13	1	295	32.8	4.87	34343.8	225.35	13	13	cell organization and biogenesis;metabolic process;transport	cytoplasm;cytosol;membrane;nucleus;ribosome	protein binding;receptor activity;RNA binding;structural molecule activity	Pf00318	3921	ENSG00000168028.13	RPSA	3	Ribosome	Cytoplasmic Ribosomal Proteins	0	62.4	47.8416	70.2667	14.4478	126.467	24.8358	108.167	24.5975	77.9333	16.437	154.733	11.9444	1.12607	2.02671	0.720493	1.43051			30.4	89.5
FALSE	High	Master Protein	P32969	60S ribosomal protein L9 OS=Homo sapiens GN=RPL9 PE=1 SV=1	0	172.859	66	10	277	10	1	192	21.9	9.95	47751.4	323.56	10	10	cell organization and biogenesis;metabolic process;transport	cytosol;membrane;nucleus;ribosome	protein binding;RNA binding;structural molecule activity	Pf00347	6133	ENSG00000163682.15	RPL9	4	Ribosome	Cytoplasmic Ribosomal Proteins	0	48.7	37.0345	77.9	23.5655	139.2	15.8963	80.3	18.496	84.8333	7.81056	169.067	2.55184	1.59959	2.85832	1.05645	2.10544			29	64.4
FALSE	High	Master Protein	P04075	Fructose-bisphosphate aldolase A OS=Homo sapiens GN=ALDOA PE=1 SV=2	0	172.437	88	27	125	27	1	364	39.4	8.09	22490.7	99.44	26	25	cell organization and biogenesis;cellular homeostasis;metabolic process;regulation of biological process;transport	cytoplasm;cytoskeleton;cytosol;extracellular;membrane;nucleus;organelle lumen	catalytic activity;protein binding;RNA binding	Pf00274	226	ENSG00000149925.17	ALDOA	16	Metabolic pathways; Pentose phosphate pathway; HIF-1 signaling pathway; Glycolysis / Gluconeogenesis; Carbon metabolism; Biosynthesis of amino acids; Fructose and mannose metabolism	Sudden Infant Death Syndrome (SIDS) Susceptibility Pathways; Glycolysis and Gluconeogenesis	0	111.867	26.064	96.7	2.7419	70.9667	13.0008	104.767	14.8775	125.1	4.95539	90.6	19.5918	0.864422	0.634386	1.19408	0.864779			144.7	89
FALSE	High	Master Protein	P46777	60S ribosomal protein L5 OS=Homo sapiens GN=RPL5 PE=1 SV=3	0	172.048	64	19	176	19	1	297	34.3	9.72	30923.4	194.12	19	19	cell organization and biogenesis;metabolic process;regulation of biological process;transport	cytoplasm;cytosol;membrane;nucleus;ribosome	protein binding;RNA binding;structural molecule activity	Pf00861, Pf14204	6125	ENSG00000122406.12	RPL5	1	Ribosome	Cytoplasmic Ribosomal Proteins	0	54.6333	24.1099	75.6667	32.1138	142.9	12.2181	70.3667	38.9237	100.133	18.845	156.333	6.11212	1.38499	2.61562	1.42302	2.2217			39.7	64.6
FALSE	High	Master Protein	Q14152	Eukaryotic translation initiation factor 3 subunit A OS=Homo sapiens GN=EIF3A PE=1 SV=1	0	170.782	27	32	144	32	1	1382	166.5	6.79	23324.7	149.74	31	31	cell organization and biogenesis;metabolic process;regulation of biological process	cytoplasm;cytosol;membrane;nucleus	protein binding;RNA binding;structural molecule activity	Pf01399	8661	ENSG00000107581.12	EIF3A	10	RNA transport	Translation Factors	0	116.433	13.9607	92.9667	14.8293	91.0333	9.08528	103.633	6.23962	94.9	18.2936	101.1	11.1363	0.798454	0.781849	0.915729	0.975555			105.4	108.8
FALSE	High	Master Protein	P08708	40S ribosomal protein S17 OS=Homo sapiens GN=RPS17 PE=1 SV=2	0	169.563	57	10	215	10	1	135	15.5	9.85	37857	241.44	10	10	cell organization and biogenesis;metabolic process;transport	cytosol;membrane;ribosome	RNA binding;structural molecule activity	Pf00833	6218	ENSG00000278229.2; ENSG00000182774.10	RPS17; RPS17L	15; CHR_HSCHR15_5_CTG8	Ribosome	Cytoplasmic Ribosomal Proteins	0	69.9333	38.2507	70.3667	10.3326	130.733	18.1941	106.933	17.9157	83.4667	14.6819	138.567	10.179	1.0062	1.8694	0.780549	1.29582			41.7	94.9
FALSE	High	Master Protein	P62906	60S ribosomal protein L10a OS=Homo sapiens GN=RPL10A PE=1 SV=2	0	169.065	54	15	214	15	1	217	24.8	9.94	40732.1	265.33	15	15	cell organization and biogenesis;metabolic process;response to stimulus;transport	cytosol;membrane;nucleus;ribosome	protein binding;RNA binding;structural molecule activity	Pf00687	4736	ENSG00000198755.10	RPL10A	6	Ribosome	Cytoplasmic Ribosomal Proteins	0	49.8	14.5121	89.5333	23.7982	135.233	8.67801	74.0667	9.72597	102.333	18.9169	149.067	9.79068	1.79786	2.71553	1.38164	2.0126			41.5	53.2
FALSE	High	Master Protein	P13645	Keratin, type I cytoskeletal 10 OS=Homo sapiens GN=KRT10 PE=1 SV=6	0	168.307	47	26	166	24	1	584	58.8	5.21	28717.3	193.87	24	25	cell death;cell differentiation;metabolic process	cytoplasm;cytoskeleton;cytosol;membrane;nucleus	structural molecule activity	Pf00038, Pf04111	3858	ENSG00000186395.7	KRT10	17	Staphylococcus aureus infection		2	51.7667	101.072	121.833	78.2829	199.133	116.204	65.6667	92.8203	45.2667	51.1691	116.3	81.6379	2.35351	3.84675	0.68934	1.77107			28.4	111.7
FALSE	High	Master Protein	P38646	Stress-70 protein, mitochondrial OS=Homo sapiens GN=HSPA9 PE=1 SV=2	0	167.006	49	29	126	28	1	679	73.6	6.16	20487.1	130.04	29	29	cell differentiation;cell organization and biogenesis;metabolic process;regulation of biological process;response to stimulus	cytoplasm;mitochondrion;nucleus;organelle lumen	nucleotide binding;protein binding;RNA binding	Pf00012, Pf06723	3313	ENSG00000113013.12	HSPA9	5	Tuberculosis; RNA degradation	Parkin-Ubiquitin Proteasomal System pathway	0	107.6	12.4244	91.0333	6.36592	93.1333	14.2051	101.8	20.6429	111.3	2.12428	95.2	8.58457	0.846035	0.865551	1.09332	0.935167			92.8	111.2
FALSE	High	Master Protein	P62701	40S ribosomal protein S4, X isoform OS=Homo sapiens GN=RPS4X PE=1 SV=2	0	164.579	69	24	213	24	1	263	29.6	10.15	36894.9	228.67	24	24	cell organization and biogenesis;development;metabolic process;regulation of biological process;transport	cytoplasm;cytosol;membrane;ribosome	protein binding;RNA binding;structural molecule activity	Pf00900, Pf08071	6191	ENSG00000198034.10	RPS4X	X	Ribosome	Cytoplasmic Ribosomal Proteins	0	71.8	28.6065	63.9333	8.90364	130.233	17.3095	89.5333	7.05183	89.4333	21.2779	155.1	7.77018	0.890436	1.81383	0.998883	1.73232			54.5	94.5
FALSE	High	Master Protein	P00338-3	Isoform 3 of L-lactate dehydrogenase A chain OS=Homo sapiens GN=LDHA	0	163.612	53	21	192	19	1	361	39.8	8.43	31785.4	195.23	21	21	metabolic process;regulation of biological process;response to stimulus	cytosol;membrane;nucleus	catalytic activity;nucleotide binding;protein binding	Pf00056, Pf02866	3939	ENSG00000134333.13	LDHA	11		Cori Cycle; Glycolysis and Gluconeogenesis; Amino Acid metabolism; Photodynamic therapy-induced HIF-1 survival signaling	1	86.4	10.2029	86.9333	6.06544	67.4333	8.67534	150.967	10.5771	105.167	11.8277	103.033	8.45576	1.00617	0.780478	0.696622	0.682491			77.3	87
FALSE	High	Master Protein	P23528	Cofilin-1 OS=Homo sapiens GN=CFL1 PE=1 SV=3	0	160.015	77	21	212	13	1	166	18.5	8.09	38290.4	232.98	21	21	cell organization and biogenesis;cellular component movement;metabolic process;regulation of biological process;response to stimulus	cytoplasm;cytoskeleton;cytosol;membrane;nucleus	protein binding	Pf00241	1072	ENSG00000172757.12	CFL1	11	Fc gamma R-mediated phagocytosis; Axon guidance; Pertussis; Regulation of actin cytoskeleton	VEGFA-VEGFR2 Signaling Pathway; G13 Signaling Pathway; Regulation of Actin Cytoskeleton; Brain-Derived Neurotrophic Factor (BDNF) signaling pathway; EGF/EGFR Signaling Pathway	9	158	25.2749	119.1	3.49936	61.1667	28.8788	113.967	32.2909	92.5667	23.2286	55.2	23.7664	0.753797	0.387131	0.812226	0.484352			201.5	123
FALSE	High	Master Protein	P09211	Glutathione S-transferase P OS=Homo sapiens GN=GSTP1 PE=1 SV=2	0	159.03	62	14	243	14	1	210	23.3	5.64	37879.9	242.17	14	13	cell communication;cell proliferation;metabolic process;regulation of biological process;response to stimulus;transport	cytoplasm;cytosol;extracellular;membrane;mitochondrion;nucleus;organelle lumen	antioxidant activity;catalytic activity;enzyme regulator activity;protein binding	Pf00043, Pf02798, Pf14497	2950	ENSG00000084207.15	GSTP1	11	Drug metabolism - cytochrome P450; Metabolism of xenobiotics by cytochrome P450; Platinum drug resistance; Prostate cancer; Glutathione metabolism; Chemical carcinogenesis; Pathways in cancer	NRF2 pathway; Photodynamic therapy-induced NFE2L2 (NRF2) survival signaling; Exercise-induced Circadian Regulation; Metapathway biotransformation; Arachidonate Epoxygenase / Epoxide Hydrolase	0	127.2	15.0654	119.533	19.2022	72.5667	16.516	127.667	6.68983	87.2333	22.4849	65.8667	9.34208	0.939727	0.570493	0.68329	0.515927			141.8	105.5
FALSE	High	Master Protein	P07195	L-lactate dehydrogenase B chain OS=Homo sapiens GN=LDHB PE=1 SV=2	0	158.5	60	21	182	19	1	334	36.6	6.05	33639.1	219.43	20	21	metabolic process	cytoplasm;cytosol;membrane;mitochondrion	catalytic activity;nucleotide binding;protein binding	Pf00056, Pf02866	3945	ENSG00000111716.12	LDHB	12	Metabolic pathways; Pyruvate metabolism; Glycolysis / Gluconeogenesis; Propanoate metabolism; Cysteine and methionine metabolism; Glucagon signaling pathway	Glycolysis and Gluconeogenesis	0	118.133	15.7377	125.833	19.8014	80	14.5285	111.767	18.2835	81.5667	24.0308	82.7333	10.7278	1.06518	0.677201	0.729794	0.740233			96.7	127.8
FALSE	High	Master Protein	P25705	ATP synthase subunit alpha, mitochondrial OS=Homo sapiens GN=ATP5A1 PE=1 SV=1	0	158.216	49	24	144	24	1	553	59.7	9.13	24739.5	159.43	24	24	cell organization and biogenesis;metabolic process;regulation of biological process;transport	membrane;mitochondrion;organelle lumen	catalytic activity;nucleotide binding;protein binding;RNA binding;transporter activity	Pf00006, Pf00306, Pf02663, Pf02874, Pf05943	498	ENSG00000152234.15	ATP5A1	18	Oxidative phosphorylation; Huntington's disease; Metabolic pathways; Parkinson's disease; Alzheimer's disease	Oxidative phosphorylation; Electron Transport Chain	0	115.033	30.123	91.5333	12.5677	83.0667	15.5946	113.633	3.39275	110.233	11.609	86.5	24.64	0.795711	0.72211	0.970079	0.76122			80.2	115.4
FALSE	High	Master Protein	P27797	Calreticulin OS=Homo sapiens GN=CALR PE=1 SV=1	0	157.588	61	23	143	23	1	417	48.1	4.44	24631.9	150.7	23	23	cell differentiation;cell organization and biogenesis;cellular homeostasis;metabolic process;regulation of biological process;response to stimulus;transport	cell surface;cytoplasm;cytosol;endoplasmic reticulum;extracellular;Golgi;membrane;nucleus;organelle lumen	DNA binding;metal ion binding;protein binding;RNA binding	Pf00262	811	ENSG00000179218.13	CALR	19	HTLV-I infection; Phagosome; Chagas disease (American trypanosomiasis); Antigen processing and presentation; Protein processing in endoplasmic reticulum	Calcium Regulation in the Cardiac Cell; Photodynamic therapy-induced unfolded protein response; Androgen receptor signaling pathway	0	139.967	16.666	124	20.3317	79.9	27.2402	94.5667	20.3475	89.3667	25.9306	72.2	32.8474	0.885925	0.57085	0.945012	0.763483			166.9	126.2
FALSE	High	Master Protein	Q15029	116 kDa U5 small nuclear ribonucleoprotein component OS=Homo sapiens GN=EFTUD2 PE=1 SV=1	0	155.267	40	28	130	27	1	972	109.4	5	20365.2	134.26	28	28	cell organization and biogenesis;metabolic process;response to stimulus	cytosol;membrane;nucleus;spliceosomal complex	catalytic activity;nucleotide binding;protein binding;RNA binding	Pf00009, Pf00679, Pf03144, Pf03764, Pf14492	9343	ENSG00000108883.12	EFTUD2	17	Spliceosome	mRNA Processing	0	84.6	7.67139	104.967	1.76268	100.1	7.87438	90.2	28.9459	108.533	18.3218	111.667	3.85213	1.24074	1.18322	1.20325	1.23799			77.4	86.4
FALSE	High	Master Protein	Q08211	ATP-dependent RNA helicase A OS=Homo sapiens GN=DHX9 PE=1 SV=4	0	154.794	29	29	147	29	1	1270	140.9	6.84	24226.9	172.32	28	28	cell death;cell differentiation;cell organization and biogenesis;defense response;metabolic process;regulation of biological process;response to stimulus;transport	cytoplasm;cytoskeleton;cytosol;membrane;nucleus;ribosome	catalytic activity;DNA binding;metal ion binding;nucleotide binding;protein binding;RNA binding	Pf00035, Pf00270, Pf00271, Pf04408, Pf07717	1660	ENSG00000135829.16	DHX9	1		mRNA Processing	0	105.133	17.117	93.7667	6.50842	82.6667	20.6073	98.5667	17.7012	109.5	14.8173	110.367	28.5544	0.891883	0.786303	1.11092	1.11972			89.7	100.8
FALSE	High	Master Protein	P61247	40S ribosomal protein S3a OS=Homo sapiens GN=RPS3A PE=1 SV=2	0	154.514	67	27	259	27	1	264	29.9	9.73	40146.1	259.65	27	26	cell differentiation;cell organization and biogenesis;metabolic process;regulation of biological process;transport	cytoplasm;cytosol;endoplasmic reticulum;nucleus;ribosome	protein binding;RNA binding;structural molecule activity	Pf01015	6189	ENSG00000145425.9	RPS3A	4	Ribosome	Cytoplasmic Ribosomal Proteins	0	68.4667	25.5767	61.9667	12.0821	141.867	13.5458	92.3333	8.75874	87.1	17.8909	148.333	12.3991	0.905063	2.07205	0.943321	1.6065			49.6	84.2
FALSE	High	Master Protein	P62081	40S ribosomal protein S7 OS=Homo sapiens GN=RPS7 PE=1 SV=1	0	154.213	66	15	199	15	1	194	22.1	10.1	35430.3	244.6	15	14	cell organization and biogenesis;metabolic process;regulation of biological process;transport	cytoplasm;cytoskeleton;cytosol;membrane;nucleus;ribosome	protein binding;RNA binding;structural molecule activity	Pf01251	6201	ENSG00000171863.12	RPS7	2	Ribosome	Cytoplasmic Ribosomal Proteins	0	67.3333	15.8336	84.5667	33.5343	133.367	19.3796	97.6	17.7491	71.2333	7.19161	145.867	19.307	1.25594	1.98069	0.72985	1.49454			62.1	79.6
FALSE	High	Master Protein	P38919	Eukaryotic initiation factor 4A-III OS=Homo sapiens GN=EIF4A3 PE=1 SV=4	0	153.174	53	21	120	18	1	411	46.8	6.73	20551.5	85.02	21	20	metabolic process;regulation of biological process;response to stimulus;transport	cytoplasm;cytosol;membrane;nucleus;spliceosomal complex	catalytic activity;nucleotide binding;protein binding;RNA binding	Pf00270, Pf00271	9775	ENSG00000141543.9	EIF4A3	17	mRNA surveillance pathway; Spliceosome; RNA transport		0	37.3333	23.4269	126.567	21.2262	114.633	3.75953	53.8667	16.5132	112.833	10.485	154.733	16.245	3.39018	3.07054	2.09468	2.87252			33	47.4
FALSE	High	Master Protein	P18206	Vinculin OS=Homo sapiens GN=VCL PE=1 SV=4	0	150.774	33	36	131	36	1	1134	123.7	5.66	20756.8	115.03	35	34	cell growth;cell organization and biogenesis;cellular component movement;regulation of biological process;transport	cytoplasm;cytoskeleton;cytosol;extracellular;membrane;organelle lumen	protein binding;structural molecule activity	Pf01044	7414	ENSG00000035403.17	VCL	10	Leukocyte transendothelial migration; Focal adhesion; Shigellosis; Regulation of actin cytoskeleton; Amoebiasis; Bacterial invasion of epithelial cells; Adherens junction	Primary Focal Segmental Glomerulosclerosis FSGS; Focal Adhesion; Regulation of Actin Cytoskeleton; VEGFA-VEGFR2 Signaling Pathway; Integrin-mediated Cell Adhesion	0	106.633	14.1673	102.833	9.34629	86.2333	10.2721	102.6	12.2323	115.967	10.1886	85.7	2.02443	0.964364	0.80869	1.13028	0.835283			113.6	89.3
FALSE	High	Master Protein	Q14974	Importin subunit beta-1 OS=Homo sapiens GN=KPNB1 PE=1 SV=2	0	148.488	29	20	131	20	1	876	97.1	4.78	22583.4	146.43	20	20	cell organization and biogenesis;cellular component movement;metabolic process;regulation of biological process;response to stimulus;transport	cytoplasm;cytosol;extracellular;membrane;nucleus;organelle lumen	metal ion binding;protein binding;RNA binding;transporter activity	Pf02985, Pf03810, Pf13513, Pf13646	3837	ENSG00000108424.9	KPNB1	17	RNA transport	Sterol Regulatory Element-Binding Proteins (SREBP) signalling	0	136	17.5161	92.6667	12.9282	86.8333	7.01677	99.8333	19.6884	99.8333	10.5062	84.8	11.3336	0.681373	0.63848	1	0.849416			163.4	120.2
FALSE	High	Master Protein	P61978-2	Isoform 2 of Heterogeneous nuclear ribonucleoprotein K OS=Homo sapiens GN=HNRNPK	0	148.287	46	17	160	1	1	464	51	5.33	26567	186.94	17	15	metabolic process;regulation of biological process;response to stimulus	cytoplasm;membrane;nucleus;spliceosomal complex	DNA binding;protein binding;RNA binding	Pf00013, Pf08067, Pf13014, Pf13083	3190	ENSG00000165119.20	HNRNPK	9		mRNA Processing	0	329.3	57.735	406.9	57.735	414.6	57.735	294.6	57.735	529	57.735	425.6	57.735	1.23565	1.25903	1.79566	1.44467				329.3
FALSE	High	Master Protein	P56192	Methionine--tRNA ligase, cytoplasmic OS=Homo sapiens GN=MARS PE=1 SV=2	0	147.938	41	28	110	28	1	900	101.1	6.16	17827.6	87.95	27	27	cell communication;metabolic process;regulation of biological process;response to stimulus	cytoplasm;cytosol;membrane	catalytic activity;nucleotide binding;protein binding;RNA binding	Pf00043, Pf00133, Pf00458, Pf09334, Pf10978, Pf13409, Pf13410, Pf14497	4141	ENSG00000166986.14	MARS	12	Aminoacyl-tRNA biosynthesis; Selenocompound metabolism		0	130.9	39.4701	74.2667	15.1278	70.5667	21.7737	160.667	12.422	88.4	12.7362	75.2	31.516	0.567354	0.539088	0.550207	0.46805			71.3	158.4
FALSE	High	Master Protein	P62910	60S ribosomal protein L32 OS=Homo sapiens GN=RPL32 PE=1 SV=2	0	143.914	50	12	184	12	1	135	15.9	11.33	33535.1	243.85	12	11	cell organization and biogenesis;metabolic process;response to stimulus;transport	cytosol;membrane;ribosome	RNA binding;structural molecule activity	Pf01655	6161	ENSG00000144713.12	RPL32	3	Ribosome	Cytoplasmic Ribosomal Proteins	0	49.7667	39.0654	97.6333	22.1512	129.133	14.6768	72.0667	12.1622	93.5	14.274	157.867	16.7996	1.96182	2.59478	1.29741	2.19056			27.9	56.3
FALSE	High	Master Protein	P68032	Actin, alpha cardiac muscle 1 OS=Homo sapiens GN=ACTC1 PE=1 SV=1	0	143.685	34	12	265	2	1	377	42	5.39	48280.5	282.48	12	12	cell death;cell organization and biogenesis;cellular component movement;regulation of biological process;response to stimulus	cytoplasm;cytoskeleton;cytosol;membrane	catalytic activity;nucleotide binding;protein binding	Pf00022	70	ENSG00000159251.6	ACTC1	15	Dilated cardiomyopathy; Cardiac muscle contraction; Hypertrophic cardiomyopathy (HCM); Adrenergic signaling in cardiomyocytes	Myometrial Relaxation and Contraction Pathways; Striated Muscle Contraction; Cardiac Progenitor Differentiation	0	154.85	59.4038	129.7	62.9383	100.25	63.0699	174.15	58.1213	138.5	60.8685	102.55	57.7731	0.837585	0.647401	0.795291	0.58886				133.2
FALSE	High	Master Protein	P26641-2	Isoform 2 of Elongation factor 1-gamma OS=Homo sapiens GN=EEF1G	0	142.148	61	26	131	26	1	487	56.1	7.72	21457.1	116.02	26	26	metabolic process;response to stimulus	cytoplasm;cytosol;endoplasmic reticulum;membrane;nucleus	catalytic activity;protein binding;RNA binding	Pf00043, Pf00647, Pf02798, Pf13409, Pf13410, Pf13417, Pf14497	1937		EEF1G	11		Translation Factors	0	136.1	2.61535	99.9333	6.57807	93.5	10.7096	95.7667	15.7797	92.6333	6.42688	82.0667	5.7171	0.734264	0.686995	0.967282	0.856944			139.5	136.4
FALSE	High	Master Protein	Q13200	26S proteasome non-ATPase regulatory subunit 2 OS=Homo sapiens GN=PSMD2 PE=1 SV=3	0	141.075	30	23	115	23	1	908	100.1	5.2	21371	131.31	23	21	metabolic process;regulation of biological process;response to stimulus;transport	cytoplasm;cytosol;extracellular;membrane;nucleus;organelle lumen;proteasome	catalytic activity;enzyme regulator activity;nucleotide binding;protein binding	Pf01851	5708	ENSG00000175166.16	PSMD2	3	Proteasome; Epstein-Barr virus infection	TNF alpha Signaling Pathway; Parkin-Ubiquitin Proteasomal System pathway; Proteasome Degradation	0	115.7	27.737	94.7	11.9081	77.6667	11.2293	148.267	27.2329	85.5	17.8131	78.1333	1.74706	0.818496	0.671276	0.576664	0.526978			82.3	118.5
FALSE	High	Master Protein	P40926	Malate dehydrogenase, mitochondrial OS=Homo sapiens GN=MDH2 PE=1 SV=3	0	140.748	61	18	148	18	1	338	35.5	8.68	27166.8	180.01	18	18	metabolic process	membrane;mitochondrion;nucleus;organelle lumen	catalytic activity;nucleotide binding;protein binding;RNA binding	Pf00056, Pf01073, Pf01118, Pf02866, Pf13460	4191	ENSG00000146701.11	MDH2	7	Metabolic pathways; Citrate cycle (TCA cycle); Glyoxylate and dicarboxylate metabolism; Pyruvate metabolism; Cysteine and methionine metabolism; Carbon metabolism	TCA Cycle; Glycolysis and Gluconeogenesis; Amino Acid metabolism	0	115.867	6.65863	97.5333	12.3105	81.4333	6.16491	114.433	6.30904	96.5667	17.9101	94.1667	17.5817	0.841772	0.702819	0.843868	0.822895			122.7	107.5
FALSE	High	Master Protein	Q14008-3	Isoform 3 of Cytoskeleton-associated protein 5 OS=Homo sapiens GN=CKAP5	0	140.292	18	36	99	36	1	2039	226.1	7.77	15858.7	108.44	35	34	cell division;cell organization and biogenesis;regulation of biological process;transport	chromosome;cytoskeleton;cytosol;membrane	protein binding	Pf12348	9793		CKAP5	11			0	114.167	12.4692	83.2	11.9445	90.2333	2.91602	101.433	3.54136	112.167	7.80144	98.7667	4.27209	0.728759	0.790365	1.10582	0.97371			130.1	102.7
FALSE	High	Master Protein	O43707	Alpha-actinin-4 OS=Homo sapiens GN=ACTN4 PE=1 SV=2	0	139.666	41	28	87	17	1	911	104.8	5.44	14260.8	72.34	28	27	cell organization and biogenesis;cellular component movement;regulation of biological process;response to stimulus;transport	cytoplasm;cytoskeleton;cytosol;extracellular;nucleus;organelle lumen	DNA binding;metal ion binding;protein binding;RNA binding	Pf00307, Pf00435, Pf08726, Pf11971, Pf13499	81	ENSG00000282844.1; ENSG00000130402.11	ACTN4	19; CHR_HG26_PATCH	Amoebiasis; Regulation of actin cytoskeleton; Tight junction; Viral carcinogenesis; Leukocyte transendothelial migration; Focal adhesion; Systemic lupus erythematosus; Adherens junction; Arrhythmogenic right ventricular cardiomyopathy (ARVC)	Arrhythmogenic Right Ventricular Cardiomyopathy; Primary Focal Segmental Glomerulosclerosis FSGS; Striated Muscle Contraction	10	95.7333	20.0482	93.1	10.0915	90.2	10.6263	97.1333	17.4205	117	10.2204	106.8	3.31175	0.972493	0.942201	1.20453	1.09952			116.3	78.3
FALSE	High	Master Protein	P35527	Keratin, type I cytoskeletal 9 OS=Homo sapiens GN=KRT9 PE=1 SV=3	0	139.2	49	20	102	19	1	623	62	5.24	17951.3	89.97	20	19	cell death;cell organization and biogenesis	cytosol;membrane;nucleus	structural molecule activity	Pf00038, Pf13166	3857	ENSG00000171403.9	KRT9	17			0	163.45	60.8957	252	74.512	235.1	65.9418	178.05	71.4184	161.05	60.543	210.35	79.9551	1.54176	1.43836	0.904521	1.18141				195.1
FALSE	High	Master Protein	Q9Y490	Talin-1 OS=Homo sapiens GN=TLN1 PE=1 SV=3	0	139.162	15	27	90	27	1	2541	269.6	6.07	15373.6	99.29	27	26	cell organization and biogenesis;cellular component movement;regulation of biological process;response to stimulus;transport	cell surface;cytoplasm;cytoskeleton;cytosol;extracellular;membrane	protein binding;structural molecule activity	Pf00373, Pf01608, Pf02174, Pf08913, Pf09141, Pf09379	7094	ENSG00000137076.20	TLN1	9	Rap1 signaling pathway; Platelet activation; HTLV-I infection; Focal adhesion	Focal Adhesion; Primary Focal Segmental Glomerulosclerosis FSGS; Integrin-mediated Cell Adhesion	0	102.533	22.5833	87.4333	15.4544	97.3667	7.02407	95.1333	14.3691	119.367	16.6943	98.1667	21.2563	0.852731	0.94961	1.25473	1.03189			123	77.4
FALSE	High	Master Protein	P05455	Lupus La protein OS=Homo sapiens GN=SSB PE=1 SV=2	0	139.044	56	27	130	27	1	408	46.8	7.12	22227.4	116.44	27	24	metabolic process;transport	cytoplasm;nucleus	protein binding;RNA binding	Pf00076, Pf05383, Pf08777, Pf14259	6741	ENSG00000138385.15	SSB	2	Systemic lupus erythematosus		0	116.3	18.0815	105.533	14.5053	78.8	21.6897	104.7	14.2705	117.433	7.24783	77.2667	23.2759	0.907423	0.677558	1.12162	0.737982			138.3	96.4
FALSE	High	Master Protein	P13010	X-ray repair cross-complementing protein 5 OS=Homo sapiens GN=XRCC5 PE=1 SV=3	0	138.626	39	22	138	22	1	732	82.7	5.81	24985.2	171.46	22	22	cell differentiation;cell organization and biogenesis;cell proliferation;defense response;metabolic process;regulation of biological process;response to stimulus;transport	chromosome;cytoplasm;cytosol;extracellular;membrane;nucleus;organelle lumen	catalytic activity;DNA binding;enzyme regulator activity;nucleotide binding;protein binding;RNA binding	Pf02735, Pf03730, Pf03731, Pf08785	7520	ENSG00000079246.15	XRCC5	2	Non-homologous end-joining	Non-homologous end joining	0	126.9	13.9462	101.067	6.18569	87.1667	8.88737	98.6667	11.5613	99.7667	7.61008	86.5333	8.47423	0.796428	0.686893	1.01115	0.877027			145.3	110
FALSE	High	Master Protein	P55060	Exportin-2 OS=Homo sapiens GN=CSE1L PE=1 SV=3	0	137.061	25	25	118	25	1	971	110.3	5.77	20596.5	136.95	25	24	cell death;cell proliferation;transport	cytoplasm;cytosol;membrane;nucleus	protein binding;transporter activity	Pf03378, Pf03810, Pf08506	1434	ENSG00000124207.16	CSE1L	20			0	113.033	21.4602	101.167	20.5545	82.6333	14.0553	118.167	3.00671	102.3	23.189	82.7333	7.26865	0.895016	0.731053	0.865726	0.700141			123.5	85.3
FALSE	High	Master Protein	Q00839	Heterogeneous nuclear ribonucleoprotein U OS=Homo sapiens GN=HNRNPU PE=1 SV=6	0	135.88	32	25	137	24	1	825	90.5	6	22034.6	138.46	24	25	cell differentiation;metabolic process;regulation of biological process;response to stimulus	cell surface;chromosome;cytoplasm;membrane;nucleus;spliceosomal complex	DNA binding;nucleotide binding;protein binding;RNA binding	Pf00622, Pf13671	3192	ENSG00000153187.18	HNRNPU	1	Spliceosome	mRNA Processing	1	109.033	9.99708	77.6333	15.3676	78.0333	19.1637	125.667	25.6345	109.667	9.80416	100.067	12.4562	0.712015	0.715683	0.872679	0.796286			96.5	116.3
FALSE	High	Master Protein	P47897	Glutamine--tRNA ligase OS=Homo sapiens GN=QARS PE=1 SV=1	0	134.258	40	27	98	26	1	775	87.7	7.15	16587.1	101.64	26	26	metabolic process;regulation of biological process	cytoplasm;cytosol;organelle lumen	catalytic activity;enzyme regulator activity;nucleotide binding;protein binding	Pf00749, Pf03950, Pf04557, Pf04558	5859	ENSG00000172053.17	QARS	3	Metabolic pathways; Aminoacyl-tRNA biosynthesis		0	159.6	25.2064	70.6667	26.5881	72.8	17.6803	142.167	21.024	84.1333	19.1397	70.6667	22.2365	0.442774	0.45614	0.591794	0.497069			115.6	168.7
FALSE	High	Master Protein	P21796	Voltage-dependent anion-selective channel protein 1 OS=Homo sapiens GN=VDAC1 PE=1 SV=2	0	133.93	51	13	171	12	1	283	30.8	8.54	32275.2	242.46	13	13	cell communication;cell death;cell differentiation;defense response;metabolic process;regulation of biological process;response to stimulus;transport	membrane;mitochondrion;nucleus	protein binding;transporter activity	Pf01459	7416	ENSG00000213585.10	VDAC1	5	Parkinson's disease; Calcium signaling pathway; Huntington's disease; NOD-like receptor signaling pathway; Influenza A; HTLV-I infection; cGMP-PKG signaling pathway		1	86.9667	37.89	100.433	27.8048	97.9	25.5804	126.133	21.0938	103.567	6.94958	85.0333	16.3352	1.15485	1.12572	0.821089	0.674154			51.1	115.9
FALSE	High	Master Protein	P61978-3	Isoform 3 of Heterogeneous nuclear ribonucleoprotein K OS=Homo sapiens GN=HNRNPK	0	133.546	43	17	160	1	1	440	48.5	5.54	26480.3	193.08	17	15	metabolic process;regulation of biological process;response to stimulus	cytoplasm;membrane;nucleus;spliceosomal complex	DNA binding;protein binding;RNA binding	Pf00013, Pf08067, Pf13014, Pf13083	3190		HNRNPK	9		mRNA Processing	17	112.4	21.6748	103.033	10.1563	77.2	33.2886	100.667	24.6438	123.233	7.53982	83.5	23.3398	0.916667	0.686833	1.22417	0.82947			138	89.5
FALSE	High	Master Protein	P63104	14-3-3 protein zeta/delta OS=Homo sapiens GN=YWHAZ PE=1 SV=1	0	132.663	58	15	168	11	1	245	27.7	4.79	30743.4	179.38	15	15	cell organization and biogenesis;metabolic process;regulation of biological process;response to stimulus;transport	cytoplasm;cytosol;membrane;mitochondrion;nucleus	catalytic activity;protein binding;RNA binding	Pf00244	7534	ENSG00000164924.17	YWHAZ	8	PI3K-Akt signaling pathway; Hippo signaling pathway; Pathogenic Escherichia coli infection; Cell cycle; Epstein-Barr virus infection; Viral carcinogenesis; Oocyte meiosis; Hepatitis B	Pathogenic Escherichia coli infection; Sudden Infant Death Syndrome (SIDS) Susceptibility Pathways; Myometrial Relaxation and Contraction Pathways; Prolactin Signaling Pathway; Calcium Regulation in the Cardiac Cell; Cell Cycle	2	131.8	20.168	143.833	12.5227	70.9	18.8033	106.7	35.4206	82.5667	27.8306	64.1333	5.3068	1.0913	0.537936	0.773821	0.601062			157.1	104.1
FALSE	High	Master Protein	P62750	60S ribosomal protein L23a OS=Homo sapiens GN=RPL23A PE=1 SV=1	0	132.484	55	16	194	16	1	156	17.7	10.45	34434.1	244.42	16	15	cell organization and biogenesis;cell proliferation;metabolic process;transport	cytoplasm;cytosol;nucleus;ribosome	protein binding;RNA binding;structural molecule activity	Pf00276, Pf03939	6147	ENSG00000198242.13	RPL23A	17	Ribosome	Cytoplasmic Ribosomal Proteins	0	69.3333	36.9305	105.2	24.9591	136.467	18.2486	74.1333	11.2636	84.0333	8.3896	130.833	23.2148	1.51731	1.96827	1.13354	1.76484			98.8	56.7
FALSE	High	Master Protein	P42704	Leucine-rich PPR motif-containing protein, mitochondrial OS=Homo sapiens GN=LRPPRC PE=1 SV=3	0	131.942	25	28	113	28	1	1394	157.8	6.13	18721.8	120.79	27	28	cellular component movement;metabolic process;regulation of biological process;transport	chromosome;cytoplasm;cytoskeleton;membrane;mitochondrion;nucleus	catalytic activity;DNA binding;protein binding;RNA binding	Pf12854, Pf13041, Pf13812	10128	ENSG00000138095.18	LRPPRC	2			0	96.6	38.6977	118.167	11.3567	94.9667	11.6281	107.333	11.1359	103.3	0.588844	79.6	6.82682	1.22326	0.983092	0.962422	0.741615			55.7	105.1
FALSE	High	Master Protein	Q86VP6	Cullin-associated NEDD8-dissociated protein 1 OS=Homo sapiens GN=CAND1 PE=1 SV=2	0	131.388	29	30	132	30	1	1230	136.3	5.78	21402.2	142.04	30	30	cell differentiation;cell organization and biogenesis;cellular homeostasis;metabolic process;regulation of biological process;transport	cytoplasm;cytosol;extracellular;Golgi;membrane;nucleus;organelle lumen	protein binding	Pf08623, Pf12755, Pf13513	55832	ENSG00000111530.12	CAND1	12		Endoderm Differentiation	0	101.367	14.2364	95.4667	4.69659	77.9667	17.3342	135.1	36.523	98	26.3164	92.1	2.38129	0.941795	0.769155	0.725389	0.681717			91.3	94.9
FALSE	High	Master Protein	Q14103-3	Isoform 3 of Heterogeneous nuclear ribonucleoprotein D0 OS=Homo sapiens GN=HNRNPD	0	131.382	38	17	167	15	1	306	32.8	8.16	29103.8	199.3	17	17	metabolic process;regulation of biological process;response to stimulus	cytosol;nucleus	DNA binding;protein binding;RNA binding	Pf00076, Pf13893, Pf14259	3184	ENSG00000138668.18	HNRNPD	4		mRNA Processing	1	132.3	19.4079	146.533	15.4675	66.5667	49.5949	99.6333	19.7807	92.7667	17.5621	62.1333	34.7805	1.10758	0.503149	0.931081	0.62362			161.1	111.8
FALSE	High	Master Protein	P06748	Nucleophosmin OS=Homo sapiens GN=NPM1 PE=1 SV=2	0	130.787	53	20	112	20	1	294	32.6	4.78	20441.9	127.5	19	19	cell growth;cell organization and biogenesis;cellular homeostasis;metabolic process;regulation of biological process;response to stimulus;transport	cytoplasm;cytoskeleton;cytosol;membrane;nucleus	DNA binding;enzyme regulator activity;protein binding;RNA binding	Pf03066	4869	ENSG00000181163.13	NPM1	5			0	152.333	22.9427	105.233	4.44329	79.1	22.1044	85.7667	31.8261	102.3	14.9771	75.2667	34.0638	0.69081	0.519256	1.19277	0.877575			190.6	122.1
FALSE	High	Master Protein	Q9BUF5	Tubulin beta-6 chain OS=Homo sapiens GN=TUBB6 PE=1 SV=1	0	130.765	32	12	161	3	1	446	49.8	4.88	25181.7	197.68	11	12	cell organization and biogenesis	cytoplasm;cytoskeleton;nucleus	catalytic activity;nucleotide binding;structural molecule activity	Pf00091, Pf03953, Pf10644	84617	ENSG00000176014.12	TUBB6	18	Pathogenic Escherichia coli infection; Phagosome; Gap junction	Pathogenic Escherichia coli infection; Parkin-Ubiquitin Proteasomal System pathway	0	240.9	57.735	59.7	57.735	188.6	57.735	223.3	57.735	288	57.735	199.5	57.735	0.247821	0.782897	1.28974	0.893417
FALSE	High	Master Protein	Q92598	Heat shock protein 105 kDa OS=Homo sapiens GN=HSPH1 PE=1 SV=1	0	130.025	33	24	112	21	1	858	96.8	5.39	19970.2	137.96	24	23	metabolic process;regulation of biological process;response to stimulus;transport	cytoplasm;cytosol;extracellular;nucleus;organelle lumen	enzyme regulator activity;nucleotide binding;protein binding	Pf00012	10808	ENSG00000120694.19	HSPH1	13	Protein processing in endoplasmic reticulum		1	115.867	11.6779	102.067	26.7711	86.6333	9.76609	109.767	14.514	101.967	20.8023	83.7	38.0441	0.880898	0.747699	0.92894	0.762527			130.7	104.2
FALSE	High	Master Protein	P07737	Profilin-1 OS=Homo sapiens GN=PFN1 PE=1 SV=2	0	129.791	75	12	173	12	1	140	15	8.27	35393.7	268.56	12	12	cell organization and biogenesis;regulation of biological process;response to stimulus	cytoplasm;cytoskeleton;cytosol;membrane;nucleus	enzyme regulator activity;nucleotide binding;protein binding;RNA binding	Pf00235	5216	ENSG00000108518.7	PFN1	17	Salmonella infection; Shigellosis; Regulation of actin cytoskeleton; Rap1 signaling pathway	VEGFA-VEGFR2 Signaling Pathway; Regulation of Actin Cytoskeleton; Association Between Physico-Chemical Features and Toxicity Associated Pathways; G13 Signaling Pathway	0	144.133	5.40335	118.533	10.733	67.5	15.588	120.2	9.95316	87.0333	23.6508	62.6333	27.5737	0.822387	0.468316	0.724071	0.521076			153	141
FALSE	High	Master Protein	Q92616	eIF-2-alpha kinase activator GCN1 OS=Homo sapiens GN=GCN1 PE=1 SV=6	0	128.771	13	27	98	27	1	2671	292.6	7.47	16415.6	106.34	27	25	cell communication;metabolic process;regulation of biological process;response to stimulus	cytoplasm;cytosol;membrane;ribosome	enzyme regulator activity;protein binding;RNA binding	Pf12074, Pf13646	10985		GCN1L1; GCN1	12			0	109.5	15.173	95.4333	0.336837	85.0333	6.38664	120.567	27.7559	109.033	28.0295	80.4333	8.5635	0.871537	0.77656	0.904341	0.667127			102.3	97.7
FALSE	High	Master Protein	Q02878	60S ribosomal protein L6 OS=Homo sapiens GN=RPL6 PE=1 SV=3	0	126.796	51	20	199	20	1	288	32.7	10.58	33537.1	232.76	20	19	cell organization and biogenesis;metabolic process;regulation of biological process;transport	cytosol;membrane;nucleus;ribosome	DNA binding;protein binding;RNA binding;structural molecule activity	Pf01159, Pf03868	6128	ENSG00000089009.15	RPL6	12	Ribosome	Cytoplasmic Ribosomal Proteins	0	47.7667	38.585	92.9	16.9861	138.667	9.97628	62.8	23.8317	98.6667	26.3915	159.167	6.84625	1.94487	2.903	1.57113	2.5345			26.5	59.1
FALSE	High	Master Protein	P12956	X-ray repair cross-complementing protein 6 OS=Homo sapiens GN=XRCC6 PE=1 SV=2	0	126.672	46	26	110	26	1	609	69.8	6.64	19404.4	110.92	25	25	cell organization and biogenesis;defense response;metabolic process;regulation of biological process;response to stimulus;transport	chromosome;cytoplasm;cytosol;extracellular;membrane;nucleus;organelle lumen	catalytic activity;DNA binding;nucleotide binding;protein binding;RNA binding	Pf02037, Pf02735, Pf03730, Pf03731	2547	ENSG00000196419.12	XRCC6	22	Non-homologous end-joining	Non-homologous end joining	0	120.833	14.5256	101.3	19.5529	81.8	9.72709	100.867	17.9007	111.1	14.5216	84.1333	2.20877	0.838345	0.676966	1.10145	0.834104			141.1	110.6
FALSE	High	Master Protein	P22392-2	Isoform 3 of Nucleoside diphosphate kinase B OS=Homo sapiens GN=NME2	0	125.547	79	16	140	3	1	267	30.1	8.92	25980.1	182.08	16	15	cell organization and biogenesis;cellular homeostasis;metabolic process;regulation of biological process;response to stimulus;transport	cytoplasm;cytosol;extracellular;membrane;nucleus;organelle lumen	catalytic activity;DNA binding;metal ion binding;nucleotide binding;protein binding;RNA binding	Pf00334	654364; 4830; 4831	ENSG00000011052.21	NME1-NME2; NME1; NME2	17	Purine metabolism; Metabolic pathways; Pyrimidine metabolism	Nucleotide Metabolism	16	130.233	8.23048	116.767	8.54451	74.2333	14.4526	107.367	11.6722	86.4333	19.4869	85	24.6894	0.896596	0.570003	0.805029	0.79168			135.5	117.9
FALSE	High	Master Protein	P23526	Adenosylhomocysteinase OS=Homo sapiens GN=AHCY PE=1 SV=4	0	125.375	47	21	124	20	1	432	47.7	6.34	21010.3	109.64	21	21	defense response;metabolic process;response to stimulus;transport	cytoplasm;cytosol;nucleus	catalytic activity;nucleotide binding;protein binding	Pf00670, Pf02254, Pf02826, Pf05221	191	ENSG00000101444.12	AHCY	20	Metabolic pathways; Cysteine and methionine metabolism	Trans-sulfuration pathway; Folate Metabolism; Trans-sulfuration and one carbon metabolism; One Carbon Metabolism	1	118.867	12.2265	125	18.1593	80.3333	11.5991	111.567	8.96564	77.8333	19.9588	86.4667	5.00964	1.0516	0.675827	0.69764	0.775022			109.4	111.6
FALSE	High	Master Protein	P30101	Protein disulfide-isomerase A3 OS=Homo sapiens GN=PDIA3 PE=1 SV=4	0	124.948	45	22	120	22	1	505	56.7	6.35	20906.8	126.12	22	22	cellular homeostasis;metabolic process;regulation of biological process;response to stimulus;transport	cell surface;endoplasmic reticulum;membrane;nucleus;organelle lumen	catalytic activity;protein binding;RNA binding	Pf00085, Pf13098, Pf13848, Pf13899, Pf13905	2923	ENSG00000167004.12	PDIA3	15	Antigen processing and presentation; Protein processing in endoplasmic reticulum		0	121.433	17.5202	95.6	11.1405	84.6667	21.6169	104.467	23.8418	119.167	5.6892	74.6667	9.23848	0.787263	0.697228	1.14071	0.714742			140.7	98.6
FALSE	High	Master Protein	P07237	Protein disulfide-isomerase OS=Homo sapiens GN=P4HB PE=1 SV=3	0	123.969	52	25	102	25	1	508	57.1	4.87	17889.3	108.05	25	25	cell organization and biogenesis;cellular homeostasis;metabolic process;regulation of biological process;response to stimulus	endoplasmic reticulum;extracellular;membrane;organelle lumen	catalytic activity;metal ion binding;protein binding;RNA binding	Pf00085, Pf01216, Pf13098, Pf13848, Pf13899, Pf13905	5034	ENSG00000185624.14	P4HB	17	Protein processing in endoplasmic reticulum		0	111.6	11.3894	121.567	14.3175	72.1667	10.1234	125.4	8.96872	87.5667	18.4611	81.7	16.3557	1.08931	0.646655	0.698299	0.651515			117.6	97
FALSE	High	Master Protein	P13667	Protein disulfide-isomerase A4 OS=Homo sapiens GN=PDIA4 PE=1 SV=2	0	123.912	40	26	128	26	1	645	72.9	5.07	18343.6	128.29	26	25	cellular homeostasis;metabolic process;regulation of biological process;response to stimulus;transport	cell surface;endoplasmic reticulum;organelle lumen	catalytic activity;metal ion binding;protein binding;RNA binding	Pf00085, Pf01216, Pf13098, Pf13848, Pf13905	9601	ENSG00000155660.10	PDIA4	7	Protein processing in endoplasmic reticulum; Vibrio cholerae infection; Thyroid hormone synthesis		0	118.5	8.80675	99.5667	5.32812	82.6	13.9824	106.033	16.6823	108.933	6.99203	84.3333	19.3482	0.840225	0.697046	1.02735	0.795347			128.4	107.6
FALSE	High	Master Protein	P26639	Threonine--tRNA ligase, cytoplasmic OS=Homo sapiens GN=TARS PE=1 SV=3	0	123.504	39	25	114	24	1	723	83.4	6.67	18621.3	113.17	25	25	metabolic process	cytoplasm;cytoskeleton;cytosol	catalytic activity;nucleotide binding;protein binding;RNA binding	Pf00587, Pf02824, Pf03129, Pf07973	6897	ENSG00000113407.13	TARS	5	Aminoacyl-tRNA biosynthesis		1	111.967	19.9401	112.967	25.9811	84	9.46485	125.2	20.4228	94.9667	22.8541	70.9333	27.1572	1.00893	0.750223	0.75852	0.56656			88.2	115.2
FALSE	High	Master Protein	P52272	Heterogeneous nuclear ribonucleoprotein M OS=Homo sapiens GN=HNRNPM PE=1 SV=3	0	123.209	28	21	129	21	1	730	77.5	8.7	22245.4	149.41	20	21	metabolic process;regulation of biological process;response to stimulus	membrane;nucleus;spliceosomal complex	protein binding;RNA binding	Pf00076, Pf11532, Pf11608, Pf13893, Pf14259	4670	ENSG00000099783.11	HNRNPM	19	Spliceosome	mRNA Processing	0	94.4667	30.3014	80.5667	22.6555	76.0667	13.7103	96	28.9105	112.133	4.58329	140.767	48.3375	0.852858	0.805222	1.16806	1.46632			62.6	102.8
FALSE	High	Master Protein	P62937	Peptidyl-prolyl cis-trans isomerase A OS=Homo sapiens GN=PPIA PE=1 SV=2	0	123.113	77	14	191	14	1	165	18	7.81	26827.1	172.17	14	13	cell organization and biogenesis;cellular component movement;metabolic process;regulation of biological process;response to stimulus;transport	cytoplasm;cytosol;extracellular;membrane;nucleus;organelle lumen	catalytic activity;protein binding;RNA binding	Pf00160	5478	ENSG00000196262.13	PPIA	7		Prolactin Signaling Pathway	0	159.867	16.5536	99.6667	10.8391	70.5	27.2566	110.5	33.2308	97.7333	2.65702	61.7333	24.3058	0.623436	0.440992	0.884465	0.558673			190.2	141.5
FALSE	High	Master Protein	P27824-2	Isoform 2 of Calnexin OS=Homo sapiens GN=CANX	0	122.966	39	25	109	25	1	627	71.5	4.7	18022.6	118.69	25	25	metabolic process;regulation of biological process;response to stimulus;transport	endoplasmic reticulum;membrane;organelle lumen;ribosome	metal ion binding;protein binding;RNA binding	Pf00262	821		CANX	5			0	100.1	25.2771	106.033	13.9357	113.1	43.2809	100.5	22.5805	100.533	12.956	79.8	10.3146	1.05927	1.12987	1.00033	0.79403			78	94.6
FALSE	High	Master Protein	O95071	E3 ubiquitin-protein ligase UBR5 OS=Homo sapiens GN=UBR5 PE=1 SV=2	0	122.003	11	26	106	26	1	2799	309.2	5.85	17943	140.51	26	25	cell proliferation;metabolic process;regulation of biological process;response to stimulus	cytosol;membrane;nucleus	catalytic activity;metal ion binding;protein binding;RNA binding	Pf00632, Pf00658, Pf02207, Pf11547	51366	ENSG00000104517.12	UBR5	8	Ubiquitin mediated proteolysis	Tryptophan metabolism; Mesodermal Commitment Pathway	0	154.8	42.3153	56.3333	29.0519	70.7667	33.9076	159.9	41.8758	93.6333	13.937	64.5	42.2252	0.36391	0.457149	0.585574	0.403377			98.3	139.5
FALSE	High	Master Protein	P12268	Inosine-5'-monophosphate dehydrogenase 2 OS=Homo sapiens GN=IMPDH2 PE=1 SV=2	0	121.655	37	18	81	17	1	514	55.8	6.9	15459.8	108.77	18	17	cell organization and biogenesis;cell proliferation;metabolic process;response to stimulus;transport	cytoplasm;cytosol;extracellular;membrane;nucleus;organelle lumen	catalytic activity;DNA binding;metal ion binding;nucleotide binding;protein binding;RNA binding	Pf00478, Pf00571, Pf00977, Pf01070, Pf03060	3615	ENSG00000178035.11	IMPDH2	3	Purine metabolism; Drug metabolism - other enzymes; Metabolic pathways		1	126.8	4.84551	106.1	19.1036	82.0333	10.4397	103.667	6.66387	95.5667	11.1333	85.8333	0.749021	0.836751	0.646951	0.921865	0.827974			124.3	122.3
FALSE	High	Master Protein	P14868	Aspartate--tRNA ligase, cytoplasmic OS=Homo sapiens GN=DARS PE=1 SV=2	0	121.166	53	25	102	25	1	501	57.1	6.55	17180	111.13	25	25	cell organization and biogenesis;metabolic process	cytoplasm;cytosol;membrane	catalytic activity;nucleotide binding;protein binding;RNA binding	Pf00152, Pf01336	1615	ENSG00000115866.10	DARS	2	Aminoacyl-tRNA biosynthesis	Alanine and aspartate metabolism	0	157.933	36.1523	81.1333	43.3141	70.5333	27.3649	155.3	11.2645	77.4667	2.35327	57.6	7.5256	0.513719	0.446602	0.498819	0.370895			92.2	186.4
FALSE	High	Master Protein	Q99460	26S proteasome non-ATPase regulatory subunit 1 OS=Homo sapiens GN=PSMD1 PE=1 SV=2	0	120.325	29	24	96	24	1	953	105.8	5.39	15919.8	109.28	23	24	metabolic process;regulation of biological process;response to stimulus;transport	cytosol;extracellular;membrane;nucleus;organelle lumen;proteasome	catalytic activity;enzyme regulator activity;protein binding	Pf01851, Pf13513, Pf13646	5707	ENSG00000173692.12	PSMD1	2	Proteasome; Epstein-Barr virus infection	Parkin-Ubiquitin Proteasomal System pathway; Proteasome Degradation	0	130.667	6.23306	82.6667	8.15284	82.0333	6.09671	116.533	7.82557	105.533	5.45353	82.6	1.37504	0.632653	0.627806	0.905606	0.70881			125	127
FALSE	High	Master Protein	Q9Y265	RuvB-like 1 OS=Homo sapiens GN=RUVBL1 PE=1 SV=1	0	119.444	48	17	114	17	1	456	50.2	6.42	20376	146.82	17	17	cell division;cell organization and biogenesis;metabolic process;regulation of biological process;response to stimulus	cytoplasm;cytoskeleton;cytosol;membrane;nucleus	catalytic activity;nucleotide binding;protein binding	Pf00004, Pf01078, Pf01695, Pf05496, Pf06068, Pf06414, Pf07726, Pf13191, Pf13238, Pf13245, Pf13481	8607	ENSG00000175792.11	RUVBL1	3	Wnt signaling pathway	Gastric Cancer Network 1	0	130.5	16.9826	93.4	5.83782	84.6667	5.87037	102.967	12.2375	106.2	7.10408	82.2333	4.48842	0.715709	0.648787	1.0314	0.79864			149.6	106.2
FALSE	High	Master Protein	P62829	60S ribosomal protein L23 OS=Homo sapiens GN=RPL23 PE=1 SV=1	0	119.39	59	8	188	8	1	140	14.9	10.51	33911.7	207.45	8	8	cell organization and biogenesis;metabolic process;regulation of biological process;response to stimulus;transport	cytoplasm;cytosol;membrane;ribosome	protein binding;RNA binding;structural molecule activity	Pf00238	9349	ENSG00000125691.12	RPL23	17	Ribosome	Cytoplasmic Ribosomal Proteins	0	44.1667	36.2274	76.1333	21.5469	153.333	7.78913	72.0333	25.5303	85.4	9.54386	168.9	3.72767	1.72377	3.4717	1.18556	2.34475			25.7	52.9
FALSE	High	Master Protein	P17980	26S proteasome regulatory subunit 6A OS=Homo sapiens GN=PSMC3 PE=1 SV=3	0	118.966	48	17	114	17	1	439	49.2	5.24	19812.8	119.73	16	17	metabolic process;regulation of biological process;response to stimulus;transport	cytoplasm;cytosol;extracellular;membrane;nucleus;organelle lumen;proteasome	catalytic activity;enzyme regulator activity;nucleotide binding;protein binding	Pf00004, Pf01078, Pf05496, Pf07724, Pf07728, Pf13191	5702	ENSG00000165916.8	PSMC3	11	Epstein-Barr virus infection; Proteasome	Proteasome Degradation; Parkin-Ubiquitin Proteasomal System pathway	0	100.967	40.9181	96.5	7.69147	87.8667	14.4337	150	28.3565	86.1	20.6922	78.5667	5.72243	0.955761	0.870254	0.574	0.523778			56.7	107.7
FALSE	High	Master Protein	P07355-2	Isoform 2 of Annexin A2 OS=Homo sapiens GN=ANXA2	0	118.85	71	24	102	24	1	357	40.4	8.37	17460.5	101.13	24	22	cell organization and biogenesis;metabolic process;regulation of biological process;response to stimulus;transport	cell surface;cytoplasm;cytosol;endosome;extracellular;membrane;nucleus;organelle lumen	enzyme regulator activity;metal ion binding;protein binding;RNA binding	Pf00191	302	ENSG00000182718.16	ANXA2	15		Prostaglandin Synthesis and Regulation	0	113	17.5009	102.967	10.4068	68.3333	13.0935	137.7	8.39778	101.4	10.0083	76.6	10.6034	0.911209	0.60472	0.736383	0.556282			135	96.7
FALSE	High	Master Protein	O75369-8	Isoform 8 of Filamin-B OS=Homo sapiens GN=FLNB	0	118.568	13	28	104	23	1	2633	281.5	5.71	16400.2	115.11	28	28	cell organization and biogenesis;regulation of biological process;response to stimulus	cytoplasm;cytoskeleton;cytosol;membrane;nucleus	protein binding;RNA binding	Pf00307, Pf00630	2317	ENSG00000136068.14	FLNB	3		VEGFA-VEGFR2 Signaling Pathway	0	84.2333	11.0747	74.2333	11.9508	101.833	13.1765	93.6667	21.7176	129.467	22.3452	116.567	18.6798	0.881282	1.20894	1.38221	1.24448			80.2	77.6
FALSE	High	Master Protein	Q13813-2	Isoform 2 of Spectrin alpha chain, non-erythrocytic 1 OS=Homo sapiens GN=SPTAN1	0	118.39	12	26	70	26	1	2477	284.9	5.35	13018.7	75.38	25	25	cell organization and biogenesis;cellular component movement;metabolic process;regulation of biological process;response to stimulus;transport	cytoskeleton;cytosol;extracellular;membrane;organelle lumen	metal ion binding;protein binding;structural molecule activity	Pf00018, Pf00036, Pf00435, Pf07653, Pf08239, Pf08726, Pf13405, Pf13499, Pf14604	6709	ENSG00000197694.15	SPTAN1	9		Fas Ligand (FasL) pathway and Stress induction of Heat Shock Proteins (HSP) regulation	0	112.033	32.0335	92.7667	15.1302	100.633	10.8897	87.6667	28.7582	116.2	29.5409	90.6	6.40462	0.828027	0.898245	1.32548	1.03346			145.3	74
FALSE	High	Master Protein	O00410-3	Isoform 3 of Importin-5 OS=Homo sapiens GN=IPO5	0	118.104	25	21	93	21	1	1115	125.5	4.92	15227.6	88.64	21	20	regulation of biological process;response to stimulus;transport	cytoplasm;membrane;nucleus	enzyme regulator activity;protein binding;RNA binding;transporter activity	Pf02985, Pf12755, Pf13513, Pf13646	3843	ENSG00000065150.18	IPO5	13			0	102.867	28.0747	111.833	15.5923	82.2667	7.69011	125.033	21.3731	95.1333	31.2588	82.9333	8.09077	1.08717	0.799741	0.760864	0.66329			81.4	91.5
FALSE	High	Master Protein	P37802-2	Isoform 2 of Transgelin-2 OS=Homo sapiens GN=TAGLN2	0	117.241	68	15	161	15	1	220	24.4	8.25	28116.4	174.9	15	15	cell differentiation;transport	cytosol;extracellular	protein binding	Pf00307, Pf00402	8407	ENSG00000158710.14	TAGLN2	1			0	146.933	21.7409	118.933	10.5354	57.5667	29.573	123.267	18.3063	99.1333	31.5982	54.2333	13.0126	0.809437	0.391788	0.804218	0.439968			181.5	118.5
FALSE	High	Master Protein	P31939	Bifunctional purine biosynthesis protein PURH OS=Homo sapiens GN=ATIC PE=1 SV=3	0	117.139	39	17	96	17	1	592	64.6	6.71	17753	101.93	16	14	metabolic process;response to stimulus	cytosol;membrane;mitochondrion	catalytic activity;protein binding	Pf01808, Pf02142	471	ENSG00000138363.14	ATIC	2	Metabolic pathways; Antifolate resistance; One carbon pool by folate; Purine metabolism	One Carbon Metabolism	0	121.967	21.8364	100.433	9.76296	83.4	9.60805	106.533	14.4648	104.2	24.0061	83.5	12.0578	0.823449	0.683793	0.978098	0.783792			147.8	94.6
FALSE	High	Master Protein	P08758	Annexin A5 OS=Homo sapiens GN=ANXA5 PE=1 SV=2	0	116.981	61	19	125	18	1	320	35.9	5.05	20124.2	136.63	19	18	coagulation;regulation of biological process;response to stimulus;transport	cytoplasm;cytosol;extracellular;membrane	enzyme regulator activity;metal ion binding;protein binding	Pf00191	308	ENSG00000164111.14	ANXA5	4		Apoptosis-related network due to altered Notch3 in ovarian cancer; Simplified Interaction Map Between LOXL4 and Oxidative Stress Pathway; Prostaglandin Synthesis and Regulation	1	99.5333	18.9395	116.067	24.9024	78.6667	6.24996	153.4	10.9758	85.0667	22.4897	67.3333	22.4907	1.16611	0.790355	0.554542	0.43894			88.5	88.8
FALSE	High	Master Protein	P62753	40S ribosomal protein S6 OS=Homo sapiens GN=RPS6 PE=1 SV=1	0	116.819	39	13	210	13	1	249	28.7	10.84	40974.3	236.63	13	13	cell death;cell differentiation;cell organization and biogenesis;cell proliferation;metabolic process;regulation of biological process;response to stimulus;transport	cytoplasm;cytosol;membrane;nucleus;ribosome	protein binding;RNA binding;structural molecule activity	Pf01092	6194	ENSG00000137154.12	RPS6	9	Insulin signaling pathway; mTOR signaling pathway; HIF-1 signaling pathway; Proteoglycans in cancer; PI3K-Akt signaling pathway; EGFR tyrosine kinase inhibitor resistance; Ribosome	Mecp2 and Associated Rett Syndrome; Brain-Derived Neurotrophic Factor (BDNF) signaling pathway; Interleukin-11 Signaling Pathway; Follicle Stimulating Hormone (FSH) signaling pathway; Human Thyroid Stimulating Hormone (TSH) signaling pathway; Cytoplasmic Ribosomal Proteins; IL-5 Signaling Pathway; Focal Adhesion-PI3K-Akt-mTOR-signaling pathway; VEGFA-VEGFR2 Signaling Pathway; Oncostatin M Signali…	0	77	33.0491	63.8667	9.05619	136.3	14.6865	93.0333	38.1761	82.9333	24.9328	146.867	15.3181	0.829437	1.77013	0.891437	1.57865			50.7	101.5
FALSE	High	Master Protein	P16615	Sarcoplasmic/endoplasmic reticulum calcium ATPase 2 OS=Homo sapiens GN=ATP2A2 PE=1 SV=1	0	116.347	19	20	78	20	1	1042	114.7	5.34	14094	97.23	20	20	cell organization and biogenesis;cellular homeostasis;regulation of biological process;response to stimulus;transport	endoplasmic reticulum;membrane	catalytic activity;metal ion binding;nucleotide binding;protein binding;transporter activity	Pf00122, Pf00689, Pf00690, Pf00702, Pf08282, Pf12710, Pf13246	488	ENSG00000174437.16	ATP2A2	12	Adrenergic signaling in cardiomyocytes; Dilated cardiomyopathy; Calcium signaling pathway; Alzheimer's disease; Thyroid hormone signaling pathway; Arrhythmogenic right ventricular cardiomyopathy (ARVC); Hypertrophic cardiomyopathy (HCM); Cardiac muscle contraction; cAMP signaling pathway; Pancreatic secretion; cGMP-PKG signaling pathway	Myometrial Relaxation and Contraction Pathways; Alzheimers Disease; Calcium Regulation in the Cardiac Cell; Endothelin Pathways; Arrhythmogenic Right Ventricular Cardiomyopathy	0	118.2	10.2516	111.767	41.704	99.8667	22.7452	92.6333	12.564	101.9	29.6562	75.5667	31.3394	0.945572	0.844896	1.10004	0.815761			113.3	109.3
FALSE	High	Master Protein	Q02790	Peptidyl-prolyl cis-trans isomerase FKBP4 OS=Homo sapiens GN=FKBP4 PE=1 SV=3	0	115.737	49	24	101	23	1	459	51.8	5.43	17348.6	145.83	21	24	cell organization and biogenesis;metabolic process;regulation of biological process;response to stimulus;transport	cytoplasm;cytoskeleton;cytosol;mitochondrion;nucleus	catalytic activity;nucleotide binding;protein binding;RNA binding	Pf00254, Pf00515, Pf07719, Pf13174, Pf13371, Pf13414, Pf13424, Pf13432, Pf14559	2288	ENSG00000004478.7	FKBP4	12	Estrogen signaling pathway	Androgen receptor signaling pathway	1	106.567	14.4627	112.367	24.6606	78.7667	19.2646	114.733	20.6337	106.467	21.8631	81.0667	11.7423	1.05443	0.73913	0.927949	0.706566			99	96.4
FALSE	High	Master Protein	P22234	Multifunctional protein ADE2 OS=Homo sapiens GN=PAICS PE=1 SV=3	0	115.661	45	18	97	18	1	425	47	7.23	14763.7	82.49	18	17	metabolic process	cytoplasm;cytosol;membrane	catalytic activity;nucleotide binding;protein binding	Pf00731, Pf01259	10606	ENSG00000128050.8	PAICS	4	Purine metabolism; Metabolic pathways		0	113.167	24.8751	104.1	11.0696	82.5	7.14226	115.7	13.2926	96.4667	14.054	88.0333	12.2767	0.919882	0.729013	0.833765	0.760876			85.1	113
FALSE	High	Master Protein	P17844	Probable ATP-dependent RNA helicase DDX5 OS=Homo sapiens GN=DDX5 PE=1 SV=1	0	115.046	41	21	108	14	1	614	69.1	8.92	18646.2	126.75	21	19	cell differentiation;cell growth;cell organization and biogenesis;metabolic process;regulation of biological process;response to stimulus	cytoplasm;membrane;nucleus;spliceosomal complex	catalytic activity;nucleotide binding;protein binding;RNA binding	Pf00270, Pf00271, Pf08061	1655	ENSG00000108654.13	DDX5	17	Transcriptional misregulation in cancer; Spliceosome; Proteoglycans in cancer		8	120.333	11.1352	103.767	12.5153	85.1	16.7321	98.1333	20.2697	108.967	12.561	83.7	9.51904	0.862327	0.707202	1.11039	0.852921			129	104.9
FALSE	High	Master Protein	P11586	C-1-tetrahydrofolate synthase, cytoplasmic OS=Homo sapiens GN=MTHFD1 PE=1 SV=3	0	114.98	27	21	92	21	1	935	101.5	7.3	16565.6	118.4	21	19	metabolic process	cytoplasm;cytosol;membrane;mitochondrion	catalytic activity;nucleotide binding;protein binding	Pf00763, Pf01268, Pf02882	4522		MTHFD1	14	One carbon pool by folate; Metabolic pathways	Trans-sulfuration and one carbon metabolism; Folate Metabolism; One Carbon Metabolism	0	103	7.31256	103.267	8.08707	92.4667	11.4049	108.633	20.4805	105.767	10.3426	86.9333	3.28258	1.00259	0.897735	0.973612	0.800245			95.9	102.2
FALSE	High	Master Protein	Q14315	Filamin-C OS=Homo sapiens GN=FLNC PE=1 SV=3	0	113.628	12	27	91	19	1	2725	290.8	5.97	15092.6	92.72	27	27	cell organization and biogenesis	cytoplasm;cytoskeleton;cytosol;membrane	protein binding	Pf00307, Pf00630	2318	ENSG00000128591.15	FLNC	7	MAPK signaling pathway; Salmonella infection; Focal adhesion; Proteoglycans in cancer		0	91.1667	19.1634	82.7333	14.4774	101.9	8.75388	87.8667	15.0595	128.567	15.2034	107.767	6.2229	0.907495	1.11773	1.4632	1.22648			109.7	75
FALSE	High	Master Protein	P35998	26S proteasome regulatory subunit 7 OS=Homo sapiens GN=PSMC2 PE=1 SV=3	0	112.03	49	21	90	21	1	433	48.6	5.95	16026	90.6	21	20	cell differentiation;metabolic process;regulation of biological process;response to stimulus;transport	cytoplasm;cytosol;extracellular;membrane;nucleus;organelle lumen;proteasome	catalytic activity;nucleotide binding;protein binding	Pf00004, Pf00158, Pf07724, Pf07726, Pf07728, Pf13191, Pf13401	5701	ENSG00000161057.11	PSMC2	7	Proteasome; Epstein-Barr virus infection	Parkin-Ubiquitin Proteasomal System pathway; Proteasome Degradation	0	108.133	9.1101	94.4667	1.58904	88.9333	5.39769	129.433	16.6262	92.8333	18.9613	86.1667	10.6709	0.873613	0.822441	0.717229	0.665722			98.2	108.3
FALSE	High	Master Protein	Q12906-7	Isoform 7 of Interleukin enhancer-binding factor 3 OS=Homo sapiens GN=ILF3	0	111.871	29	23	105	19	1	898	95.7	8.81	18110.1	105.02	23	23	defense response;metabolic process;regulation of biological process;response to stimulus	cytoplasm;extracellular;membrane;mitochondrion;nucleus	DNA binding;protein binding;RNA binding	Pf00035, Pf07528, Pf14709	3609	ENSG00000129351.17	ILF3	19			3	112.267	15.3874	88.8	13.7733	98.3333	15.0055	87.1333	29.0807	115.233	10.3427	98.2	6.31282	0.790974	0.875891	1.32249	1.12701			127.1	93.3
FALSE	High	Master Protein	P07910	Heterogeneous nuclear ribonucleoproteins C1/C2 OS=Homo sapiens GN=HNRNPC PE=1 SV=4	0	111.377	38	14	138	14	1	306	33.7	5.08	26617.5	175.01	13	14	cell differentiation;cell organization and biogenesis;metabolic process;regulation of biological process	cytoskeleton;cytosol;extracellular;membrane;nucleus;spliceosomal complex	DNA binding;protein binding;RNA binding	Pf00076, Pf13893, Pf14259	3183	ENSG00000092199.17	HNRNPC	14	Spliceosome	mRNA Processing	0	34.0333	21.6366	112	12.5981	143.467	15.7719	33.0667	4.29109	107.767	15.2411	169.667	13.5204	3.29089	4.21548	3.25907	5.13105			27.9	42.2
FALSE	High	Master Protein	P05783	Keratin, type I cytoskeletal 18 OS=Homo sapiens GN=KRT18 PE=1 SV=2	0	111.271	54	24	80	24	1	430	48	5.45	12790.9	63.98	24	24	cell death;cell organization and biogenesis;regulation of biological process;response to stimulus;transport	cytoplasm;cytosol;nucleus	protein binding;RNA binding;structural molecule activity	Pf00038	3875	ENSG00000111057.10	KRT18	12	Pathogenic Escherichia coli infection	Pathogenic Escherichia coli infection	0	158.85	58.0604	141.65	59.9273	146.55	60.2122	101.35	62.881	129.35	59.2206	122.2	59.0597	0.891722	0.922568	1.27627	1.20572				168.6
FALSE	High	Master Protein	P04843	Dolichyl-diphosphooligosaccharide--protein glycosyltransferase subunit 1 OS=Homo sapiens GN=RPN1 PE=1 SV=1	0	110.738	38	21	90	21	1	607	68.5	6.38	14234.3	90.48	21	21	metabolic process	cytosol;endoplasmic reticulum;membrane	catalytic activity;protein binding;RNA binding	Pf04597	6184	ENSG00000163902.11	RPN1	3	Protein processing in endoplasmic reticulum; Metabolic pathways; N-Glycan biosynthesis	Proteasome Degradation	0	119.733	26.3542	109.867	34.6367	101.633	23.9773	93.0333	21.1248	93.3	13.733	82.5	19.6308	0.917595	0.848831	1.00287	0.886779			96.7	106.8
FALSE	High	Master Protein	P56537	Eukaryotic translation initiation factor 6 OS=Homo sapiens GN=EIF6 PE=1 SV=1	0	110.675	56	9	60	9	1	245	26.6	4.68	10394.1	60.85	9	9	cell organization and biogenesis;metabolic process;regulation of biological process;response to stimulus;transport	cytoplasm;cytosol;nucleus	protein binding;RNA binding	Pf01912	3692	ENSG00000242372.6	EIF6	20	Ribosome biogenesis in eukaryotes	Translation Factors	0	275.6	57.735	194.6	57.735	159.4	57.735	224.2	57.735	207.6	57.735	138.6	57.735	0.706096	0.578374	0.925959	0.618198				275.6
FALSE	High	Master Protein	P62195	26S proteasome regulatory subunit 8 OS=Homo sapiens GN=PSMC5 PE=1 SV=1	0	110.618	47	19	115	18	1	406	45.6	7.55	18639.9	117.1	19	19	metabolic process;regulation of biological process;response to stimulus;transport	cytoplasm;cytosol;membrane;nucleus;proteasome	catalytic activity;nucleotide binding;protein binding;RNA binding	Pf00004, Pf00910, Pf01057, Pf01078, Pf05496, Pf06068, Pf06414, Pf07724, Pf07726, Pf07728, Pf13191, Pf13207, Pf13401	5705	ENSG00000087191.12	PSMC5	17	Epstein-Barr virus infection; Proteasome	Proteasome Degradation; Parkin-Ubiquitin Proteasomal System pathway	1	116.933	12.3735	95.3667	4.63082	82.2333	7.01772	138.767	18.5563	92	16.6921	74.6667	8.42935	0.815564	0.70325	0.662983	0.538074			105.5	112.1
FALSE	High	Master Protein	P03243	E1B 55 kDa protein OS=Human adenovirus C serotype 5 PE=1 SV=1	0	110.423	34	14	99	14	1	496	55	7.3	18004.7	125.08	14	14	metabolic process;regulation of biological process;response to stimulus		protein binding	Pf01696, Pf04623, Pf13229							0	157	14.7462	69.5333	36.8229	75.3333	15.8251	115.867	32.6422	103.167	7.70237	79.0667	22.8078	0.442887	0.47983	0.890391	0.682394			173.3	130.5
FALSE	High	Master Protein	P26599-3	Isoform 3 of Polypyrimidine tract-binding protein 1 OS=Homo sapiens GN=PTBP1	0	109.934	29	12	100	12	1	557	59.6	9.16	21053.2	137.38	12	12	metabolic process;regulation of biological process;response to stimulus	membrane;nucleus	protein binding;RNA binding	Pf00076, Pf13893, Pf14259	5725	ENSG00000011304.19	PTBP1	19		mir-124 predicted interactions with cell cycle and differentiation; mRNA Processing	0	123.267	8.69299	98.4333	4.88943	74.4	12.9249	121	14.9258	97	21.4046	85.9667	8.50546	0.79854	0.603569	0.801653	0.710468			134.9	121.1
FALSE	High	Master Protein	Q5T4S7-2	Isoform 2 of E3 ubiquitin-protein ligase UBR4 OS=Homo sapiens GN=UBR4	0	109.355	6	28	91	28	1	5204	575.6	6.01	15039	107.59	28	27	metabolic process;transport	cytosol;membrane	catalytic activity;metal ion binding;protein binding	Pf02207, Pf13764	23352		UBR4	1			0	114.367	11.9074	83.4333	5.28637	87.2667	15.4006	119.033	28.0405	107.333	20.6491	88.6333	9.38163	0.729525	0.763043	0.901708	0.744609			101.9	112.3
FALSE	High	Master Protein	P30153	Serine/threonine-protein phosphatase 2A 65 kDa regulatory subunit A alpha isoform OS=Homo sapiens GN=PPP2R1A PE=1 SV=4	0	108.674	37	16	72	13	1	589	65.3	5.11	11900.8	67.65	16	15	cell death;cell organization and biogenesis;metabolic process;regulation of biological process;response to stimulus	chromosome;cytoplasm;cytoskeleton;cytosol;membrane;mitochondrion;nucleus	catalytic activity;enzyme regulator activity;protein binding	Pf02985, Pf13513, Pf13646	5518	ENSG00000105568.17	PPP2R1A	19	Long-term depression; Hippo signaling pathway; PI3K-Akt signaling pathway; Chagas disease (American trypanosomiasis); Oocyte meiosis; AMPK signaling pathway; Tight junction; Hepatitis C; Dopaminergic synapse; mRNA surveillance pathway; Adrenergic signaling in cardiomyocytes; TGF-beta signaling pathway; Sphingolipid signaling pathway	Focal Adhesion-PI3K-Akt-mTOR-signaling pathway; Wnt Signaling Pathway and Pluripotency; Glycogen Metabolism	3	130.433	22.9977	88.8333	36.671	85.9667	3.91433	117.633	22.4789	102.667	13.1253	74.5	3.87173	0.681063	0.659085	0.872768	0.633324			150.9	96
FALSE	High	Master Protein	P53621-2	Isoform 2 of Coatomer subunit alpha OS=Homo sapiens GN=COPA	0	108.427	24	22	99	22	1	1233	139.2	7.59	16317.5	116.51	22	21	regulation of biological process;transport	cytoplasm;cytosol;membrane	protein binding;structural molecule activity	Pf00400, Pf04053, Pf06957	1314	ENSG00000122218.14	COPA	1			0	134.767	16.2187	84.5333	11.563	91.8	5.99426	101.033	9.82687	102.767	9.30007	85.1333	14.7678	0.627257	0.681177	1.01716	0.842626			160	122.6
FALSE	High	Master Protein	P29401-2	Isoform 2 of Transketolase OS=Homo sapiens GN=TKT	0	107.755	32	18	79	18	1	631	68.8	7.52	13566.5	101.95	17	18	metabolic process;regulation of biological process	cytosol	catalytic activity;metal ion binding;protein binding	Pf00456, Pf00676, Pf02779, Pf02780	7086	ENSG00000163931.15	TKT	3		Pentose Phosphate Pathway	0	127.467	18.6729	106.3	9.17541	79.8333	13.4166	103.733	6.77922	105.233	6.94759	77.5	10.7283	0.833944	0.626308	1.01446	0.747108			151.1	103.5
FALSE	High	Master Protein	P27348	14-3-3 protein theta OS=Homo sapiens GN=YWHAQ PE=1 SV=1	0	107.529	54	14	107	10	1	245	27.7	4.78	20080.2	115.49	14	14	cell organization and biogenesis;regulation of biological process;response to stimulus;transport	cytoplasm;cytosol;membrane;mitochondrion	protein binding	Pf00244	10971	ENSG00000134308.13	YWHAQ	2	Hippo signaling pathway; Viral carcinogenesis; PI3K-Akt signaling pathway; Hepatitis B; Oocyte meiosis; Epstein-Barr virus infection; Pathogenic Escherichia coli infection; Cell cycle	Primary Focal Segmental Glomerulosclerosis FSGS; Sudden Infant Death Syndrome (SIDS) Susceptibility Pathways; Myometrial Relaxation and Contraction Pathways; Cell Cycle; Pathogenic Escherichia coli infection; Calcium Regulation in the Cardiac Cell; IL-3 Signaling Pathway	1	162.3	57.7986	186.35	58.102	96.9	63.2374	153.05	58.8249	116.55	62.0351	84.85	57.7418	1.14818	0.597043	0.761516	0.554394				157.9
FALSE	High	Master Protein	P62258	14-3-3 protein epsilon OS=Homo sapiens GN=YWHAE PE=1 SV=1	0	107.087	59	16	116	14	1	255	29.2	4.74	20658.2	122.5	16	16	cell organization and biogenesis;cellular component movement;cellular homeostasis;metabolic process;regulation of biological process;response to stimulus;transport	cytoplasm;cytosol;membrane;mitochondrion;nucleus	protein binding;RNA binding	Pf00244	7531	ENSG00000108953.16; ENSG00000274474.3	YWHAE	17; CHR_HSCHR17_2_CTG2	Hippo signaling pathway; Viral carcinogenesis; Cell cycle; Neurotrophin signaling pathway; Oocyte meiosis; Epstein-Barr virus infection; PI3K-Akt signaling pathway	Calcium Regulation in the Cardiac Cell; Cell Cycle; Sudden Infant Death Syndrome (SIDS) Susceptibility Pathways; Myometrial Relaxation and Contraction Pathways; VEGFA-VEGFR2 Signaling Pathway	4	132.6	21.8077	151.033	13.2283	66.7	20.5167	115.4	25.6515	75.5667	35.1585	58.7	14.5663	1.13901	0.503017	0.654824	0.508666			165.3	110.4
FALSE	High	Master Protein	P18621-3	Isoform 3 of 60S ribosomal protein L17 OS=Homo sapiens GN=RPL17	0	106.271	46	14	186	14	1	228	26.4	10.1	33790.5	235.71	14	14	cell organization and biogenesis;metabolic process;transport	cytosol;nucleus;ribosome	protein binding;RNA binding;structural molecule activity	Pf00237	100526842; 6139	ENSG00000215472.10	RPL17-C18ORF32; RPL17	18	Ribosome	Cytoplasmic Ribosomal Proteins	0	47.5667	19.4488	90.6333	19.1237	145.9	13.0603	62.4	18.16	98.7333	19.1971	154.767	1.91711	1.9054	3.06727	1.58226	2.48024			36.9	52.4
FALSE	High	Master Protein	P22102	Trifunctional purine biosynthetic protein adenosine-3 OS=Homo sapiens GN=GART PE=1 SV=1	0	106.129	24	19	73	19	1	1010	107.7	6.7	13058.2	68.37	19	16	metabolic process;response to stimulus	cytoplasm;cytosol	catalytic activity;metal ion binding;nucleotide binding	Pf00551, Pf00586, Pf01071, Pf02222, Pf02655, Pf02769, Pf02843, Pf02844, Pf03435, Pf07478, Pf08442, Pf08443, Pf13535, Pf15632	2618	ENSG00000159131.16	GART	21	Metabolic pathways; Purine metabolism; One carbon pool by folate; Antifolate resistance	Folate Metabolism; One Carbon Metabolism	0	110.3	8.27808	100.333	8.88181	90.3	7.82045	99.6667	2.85968	101.7	17.9694	97.7333	7.72516	0.90964	0.818676	1.0204	0.980602			114	99.9
FALSE	High	Master Protein	P04083	Annexin A1 OS=Homo sapiens GN=ANXA1 PE=1 SV=2	0	106.114	60	18	90	18	1	346	38.7	7.02	15689.9	97.02	18	18	cell differentiation;cell organization and biogenesis;cellular component movement;defense response;metabolic process;regulation of biological process;response to stimulus;transport	cell surface;cytoplasm;cytoskeleton;cytosol;endosome;extracellular;membrane;nucleus;vacuole	catalytic activity;DNA binding;enzyme regulator activity;metal ion binding;protein binding;RNA binding;structural molecule activity	Pf00191	301	ENSG00000135046.13	ANXA1	9		VEGFA-VEGFR2 Signaling Pathway; Spinal Cord Injury; Prostaglandin Synthesis and Regulation; Integrated Breast Cancer Pathway	0	120.233	20.107	103.533	26.8669	79.2	12.7694	121.633	10.2953	100.4	23.0657	74.9333	16.5509	0.861103	0.658719	0.825432	0.616059			136	92.4
FALSE	High	Master Protein	P25398	40S ribosomal protein S12 OS=Homo sapiens GN=RPS12 PE=1 SV=3	0	106.079	58	10	133	10	1	132	14.5	7.21	27543.6	207.73	10	10	cell organization and biogenesis;metabolic process;transport	cytoplasm;cytosol;membrane;ribosome	RNA binding;structural molecule activity	Pf01248	6206	ENSG00000112306.7	RPS12	6	Ribosome	Cytoplasmic Ribosomal Proteins	0	91.0333	44.1023	105.567	1.97417	116	25.0973	128.4	19.2769	85.8667	10.8716	73.0667	17.7848	1.15965	1.27426	0.668744	0.569055			44.8	117.1
FALSE	High	Master Protein	P52815	39S ribosomal protein L12, mitochondrial OS=Homo sapiens GN=MRPL12 PE=1 SV=2	0	105.712	42	8	134	8	1	198	21.3	8.87	21539.2	138.53	8	8	cell organization and biogenesis;metabolic process;regulation of biological process	membrane;mitochondrion;ribosome	protein binding;RNA binding;structural molecule activity	Pf00542	6182	ENSG00000262814.7	MRPL12	17	Ribosome		0	173.067	21.1312	127.033	17.5448	62.2	37.6271	113.167	24.839	83.7	30.0458	40.8667	9.82558	0.734014	0.359399	0.739617	0.361119			197.3	131
FALSE	High	Master Protein	Q9UQ80	Proliferation-associated protein 2G4 OS=Homo sapiens GN=PA2G4 PE=1 SV=3	0	105.219	57	21	99	21	1	394	43.8	6.55	17407.3	132.41	21	19	cell proliferation;metabolic process;regulation of biological process;transport	cytoplasm;extracellular;membrane;nucleus;organelle lumen	DNA binding;protein binding;RNA binding	Pf00557	5036	ENSG00000170515.13	PA2G4	12			0	117.967	22.0802	105.3	6.58223	87.4667	8.10233	102.033	18.56	104.867	4.97455	82.3333	20.0388	0.892625	0.741452	1.02777	0.806926			141	123.2
FALSE	High	Master Protein	P62841	40S ribosomal protein S15 OS=Homo sapiens GN=RPS15 PE=1 SV=2	0	104.854	56	5	313	5	1	145	17	10.39	43485.9	268.27	5	5	cell differentiation;cell organization and biogenesis;metabolic process;transport	cytosol;membrane;nucleus;ribosome	DNA binding;protein binding;RNA binding;structural molecule activity	Pf00203	6209	ENSG00000115268.9	RPS15	19	Ribosome	Cytoplasmic Ribosomal Proteins	0	65.8333	26.4977	63.1	25.0201	137.2	13.8478	97.2333	11.989	91.1	21.3284	145.533	10.9718	0.958481	2.08405	0.936921	1.49674			46.1	79.2
FALSE	High	Master Protein	Q06830	Peroxiredoxin-1 OS=Homo sapiens GN=PRDX1 PE=1 SV=1	0	104.774	72	17	147	14	1	199	22.1	8.13	25751.1	167.83	16	17	cell proliferation;cellular homeostasis;defense response;metabolic process;regulation of biological process;response to stimulus	cytoplasm;cytosol;mitochondrion;nucleus	antioxidant activity;catalytic activity;protein binding;RNA binding	Pf00578, Pf08534, Pf10417	5052	ENSG00000117450.13	PRDX1	1	Peroxisome	NRF2 pathway; Selenium Micronutrient Network; Androgen receptor signaling pathway	3	135.833	14.4306	112.767	4.48361	75.3667	23.353	105.067	9.37214	97.2333	8.16461	73.7333	18.433	0.830184	0.554847	0.925444	0.701777			151	113.7
FALSE	High	Master Protein	Q99729-3	Isoform 3 of Heterogeneous nuclear ribonucleoprotein A/B OS=Homo sapiens GN=HNRNPAB	0	103.921	52	18	113	17	1	285	30.6	7.91	19834.8	128.14	18	18	cell organization and biogenesis;regulation of biological process	cytoplasm;nucleus	DNA binding;protein binding;RNA binding	Pf00076, Pf08143, Pf13893, Pf14259	3182	ENSG00000197451.11	HNRNPAB	5		mRNA Processing; Preimplantation Embryo	1	134.333	19.1279	131.867	22.5382	67.1333	56.5075	108.333	9.41644	94.4	23.6376	63.9	35.96	0.981638	0.499752	0.871385	0.589846			164	119.9
FALSE	High	Master Protein	P34897	Serine hydroxymethyltransferase, mitochondrial OS=Homo sapiens GN=SHMT2 PE=1 SV=3	0	103.777	43	17	94	17	1	504	56	8.53	15273.8	79.5	17	17	cell organization and biogenesis;metabolic process;regulation of biological process;response to stimulus	cytoplasm;cytoskeleton;membrane;mitochondrion;nucleus;organelle lumen	catalytic activity;protein binding	Pf00464	6472	ENSG00000182199.10	SHMT2	12	One carbon pool by folate; Glycine, serine and threonine metabolism; Glyoxylate and dicarboxylate metabolism; Biosynthesis of amino acids; Carbon metabolism; Metabolic pathways; Antifolate resistance	One carbon metabolism and related pathways; Vitamin B12 Metabolism; Folate Metabolism; Trans-sulfuration and one carbon metabolism; One Carbon Metabolism	0	107.367	6.0104	102.933	5.57268	87.5	13.8978	112.4	14.8064	100.6	12.4897	89.1333	10.0475	0.958708	0.814964	0.895018	0.793001			114.6	102.2
FALSE	High	Master Protein	O76021	Ribosomal L1 domain-containing protein 1 OS=Homo sapiens GN=RSL1D1 PE=1 SV=3	0	103.163	37	21	87	21	1	490	54.9	10.13	15342.8	103.9	21	21	cell differentiation;metabolic process;regulation of biological process	membrane;nucleus	protein binding;RNA binding	Pf06030, Pf11797	26156	ENSG00000171490.12	RSL1D1	16		Senescence and Autophagy in Cancer	0	99.3333	9.868	110.167	16.2545	104.167	36.2347	71.5667	50.7703	117.533	10.7353	97.2667	4.73857	1.10906	1.04866	1.64229	1.35911			89	108.5
FALSE	High	Master Protein	P13807	Glycogen [starch] synthase, muscle OS=Homo sapiens GN=GYS1 PE=1 SV=2	0	102.554	33	18	88	18	1	737	83.7	6.18	16167.4	105.14	18	17	metabolic process	cytoplasm;cytosol;membrane	catalytic activity;protein binding	Pf00534, Pf05693, Pf13579	2997	ENSG00000104812.14	GYS1	19	PI3K-Akt signaling pathway; Starch and sucrose metabolism; Metabolic pathways; Insulin signaling pathway; Insulin resistance; AMPK signaling pathway; Glucagon signaling pathway	AMP-activated Protein Kinase (AMPK) Signaling; Glycogen Metabolism; Focal Adhesion-PI3K-Akt-mTOR-signaling pathway; Angiopoietin Like Protein 8 Regulatory Pathway; Insulin Signaling	0	72.6667	44.2303	154.3	11.4785	83.4667	35.4514	82.3	19.7989	121.633	12.1817	85.6333	19.5616	2.12339	1.14862	1.47793	1.0405			41.5	70.8
FALSE	High	Master Protein	P12814-4	Isoform 4 of Alpha-actinin-1 OS=Homo sapiens GN=ACTN1	0	101.6	31	22	65	11	1	930	107.1	5.58	10330.5	53.71	22	22	cell differentiation;cell organization and biogenesis;regulation of biological process;transport	cytoplasm;cytosol;extracellular;membrane;organelle lumen	metal ion binding;protein binding;RNA binding	Pf00307, Pf00435, Pf08726, Pf11971, Pf13499, Pf13833	87	ENSG00000072110.13	ACTN1	14		Arrhythmogenic Right Ventricular Cardiomyopathy; Regulation of Actin Cytoskeleton; Focal Adhesion	0	124.1	58.635	124.25	57.8139	122.8	58.1388	142.2	57.7539	163.5	57.7414	123.15	58.0511	1.00121	0.989525	1.14979	0.866034				111.4
FALSE	High	Master Protein	P62888	60S ribosomal protein L30 OS=Homo sapiens GN=RPL30 PE=1 SV=2	0	101.565	75	9	140	8	1	115	12.8	9.63	24569.9	151.36	9	9	cell organization and biogenesis;defense response;metabolic process;response to stimulus;transport	cytosol;membrane;nucleus;ribosome	protein binding;RNA binding;structural molecule activity	Pf01248	6156	ENSG00000156482.10	RPL30	8	Ribosome	Selenium Metabolism and Selenoproteins; Cytoplasmic Ribosomal Proteins	0	54.5333	7.26664	99.3333	10.6313	125.3	6.98632	69.3667	9.26829	114.933	23.191	136.567	15.826	1.82152	2.29768	1.6569	1.96877			50.4	54.9
FALSE	High	Master Protein	Q9NZI8	Insulin-like growth factor 2 mRNA-binding protein 1 OS=Homo sapiens GN=IGF2BP1 PE=1 SV=2	0	101.407	30	16	89	15	1	577	63.4	9.2	16170.9	90.78	16	16	cell proliferation;regulation of biological process;transport	cytoplasm;cytosol;nucleus	protein binding;RNA binding;translation regulator activity	Pf00013, Pf00076, Pf13014, Pf13893, Pf14259	10642	ENSG00000159217.9	IGF2BP1	17	MicroRNAs in cancer	eIF5A regulation in response to inhibition of the nuclear export system; Brain-Derived Neurotrophic Factor (BDNF) signaling pathway	2	94.2	7.39451	93.2667	12.2795	91.0333	6.33171	103.267	10.4791	115.567	6.26632	102.6	8.2051	0.990092	0.966384	1.11911	0.993544			96.4	86.4
FALSE	High	Master Protein	P12277	Creatine kinase B-type OS=Homo sapiens GN=CKB PE=1 SV=1	0	101.25	57	14	67	14	1	381	42.6	5.59	12133.3	83.01	14	14	cellular homeostasis;metabolic process	cytoplasm;cytosol;mitochondrion;nucleus	catalytic activity;nucleotide binding;protein binding	Pf00217, Pf02807	1152	ENSG00000166165.12	CKB	14	Arginine and proline metabolism; Metabolic pathways	Urea cycle and metabolism of amino groups	0	145.85	59.1046	129.3	58.0257	109.8	58.5068	153.9	58.4883	159	57.7385	102.15	59.8092	0.886527	0.752828	1.03314	0.663743				127.4
FALSE	High	Master Protein	Q92900	Regulator of nonsense transcripts 1 OS=Homo sapiens GN=UPF1 PE=1 SV=2	0	101.023	27	24	93	24	1	1129	124.3	6.61	14477.4	94.3	23	23	cell organization and biogenesis;cellular homeostasis;metabolic process;regulation of biological process;response to stimulus;transport	chromosome;cytoplasm;cytosol;nucleus;spliceosomal complex	catalytic activity;DNA binding;metal ion binding;nucleotide binding;protein binding;RNA binding	Pf04851, Pf09416, Pf13086, Pf13087, Pf13245, Pf13604	5976	ENSG00000005007.12	UPF1	19	RNA transport; mRNA surveillance pathway		0	47.9333	15.9434	84.5667	7.9723	146.233	10.147	53.2	12.1775	100.633	23.0103	167.4	8.98761	1.76426	3.05076	1.8916	3.14662			49.3	54.8
FALSE	High	Master Protein	P08670	Vimentin OS=Homo sapiens GN=VIM PE=1 SV=4	0	100.916	40	20	88	17	1	466	53.6	5.12	14166.2	71.61	20	20	cell differentiation;cell organization and biogenesis;cellular component movement;metabolic process;regulation of biological process;response to stimulus	cytoplasm;cytoskeleton;cytosol;membrane	protein binding;RNA binding;structural molecule activity	Pf00038, Pf04111, Pf04156, Pf04732, Pf05622, Pf10186	7431	ENSG00000026025.15	VIM	10	Epstein-Barr virus infection; MicroRNAs in cancer	Apoptosis-related network due to altered Notch3 in ovarian cancer; T-Cell antigen Receptor (TCR) Signaling Pathway; Primary Focal Segmental Glomerulosclerosis FSGS; Allograft Rejection; Striated Muscle Contraction; TGF-B Signaling in Thyroid Cells for Epithelial-Mesenchymal Transition; Spinal Cord Injury	0	247.7	60.1281	186.8	58.2264	133.5	60.7892	68.2	58.1804	92.05	57.7565	71.75	58.2696	0.754138	0.538958	1.34971	1.05205				206.1
FALSE	High	Master Protein	P53618	Coatomer subunit beta OS=Homo sapiens GN=COPB1 PE=1 SV=3	0	100.724	25	17	66	17	1	953	107.1	6.05	11354.2	80.34	17	17	transport	cytoplasm;cytosol;Golgi;membrane	protein binding;structural molecule activity	Pf01602, Pf07718, Pf14806	1315	ENSG00000129083.12	COPB1	11			0	157.8	58.3654	113.4	59.6055	128.35	57.7748	138.35	58.0275	150.75	57.9405	111.4	59.2439	0.718631	0.813371	1.08963	0.805204				144.3
FALSE	High	Master Protein	Q15046-2	Isoform Mitochondrial of Lysine--tRNA ligase OS=Homo sapiens GN=KARS	0	100.208	36	23	83	23	1	625	71.5	6.81	14525.8	72.89	23	21	metabolic process;regulation of biological process;response to stimulus	cytosol;membrane;mitochondrion;nucleus;organelle lumen	catalytic activity;nucleotide binding;protein binding;RNA binding	Pf00152, Pf00587, Pf01336	3735	ENSG00000065427.14	KARS	16			0	146.833	45.3746	77.4333	38.2932	76.7	27.3555	152.267	22.7958	83.5667	12.8228	63.2667	6.75299	0.527355	0.522361	0.548818	0.415499			70.9	174.1
FALSE	High	Master Protein	P29692-2	Isoform 2 of Elongation factor 1-delta OS=Homo sapiens GN=EEF1D	0	100.052	29	18	92	14	1	647	71.4	6.42	17443	100.05	18	18	metabolic process;regulation of biological process;response to stimulus	cytoplasm;cytosol;endoplasmic reticulum;nucleus	DNA binding;protein binding;RNA binding;signal transducer activity	Pf00736, Pf10587	1936	ENSG00000104529.17; ENSG00000273594.4	EEF1D	8; CHR_HSCHR8_3_CTG7		Translation Factors	4	148.7	27.1232	123.933	15.7878	83.5667	6.20222	92.3667	38.3447	83.8	12.9033	67.6333	15.1726	0.833445	0.561982	0.907254	0.732227			192	112.2
FALSE	High	Master Protein	P15311	Ezrin OS=Homo sapiens GN=EZR PE=1 SV=4	0	99.842	40	25	86	14	1	586	69.4	6.27	14005.6	94.53	25	25	cell differentiation;cell organization and biogenesis;cellular component movement;metabolic process;regulation of biological process;response to stimulus;transport	cytoplasm;cytoskeleton;cytosol;endosome;membrane	protein binding;RNA binding	Pf00373, Pf00769, Pf09379, Pf09380	7430	ENSG00000092820.17	EZR	6	Regulation of actin cytoskeleton; MicroRNAs in cancer; Leukocyte transendothelial migration; Proteoglycans in cancer; Pathogenic Escherichia coli infection; Gastric acid secretion	AGE/RAGE pathway; Regulation of Actin Cytoskeleton; VEGFA-VEGFR2 Signaling Pathway; Pathogenic Escherichia coli infection	12	104.467	10.2234	116.233	17.7899	82.3333	11.8944	118.733	9.66113	89.0333	22.7332	89.2333	6.07675	1.11264	0.78813	0.74986	0.751544			99.7	97
FALSE	High	Master Protein	P0DP23	Calmodulin-1 OS=Homo sapiens GN=CALM1 PE=1 SV=1	0	99.678	44	6	211	6	1	149	16.8	4.22	41710.8	324.1	6	6	metabolic process;regulation of biological process;response to stimulus;transport	cytoplasm;cytoskeleton;cytosol;extracellular;membrane	catalytic activity;enzyme regulator activity;metal ion binding;protein binding;transporter activity	Pf00036, Pf08726, Pf12763, Pf13202, Pf13405, Pf13499, Pf13833, Pf14658	808; 805; 801	ENSG00000160014.16; ENSG00000143933.16; ENSG00000198668.10	CALM3; CALM2; CALM1	19; 2; 14	Dopaminergic synapse; Insulin signaling pathway; Neurotrophin signaling pathway; Olfactory transduction; Phosphatidylinositol signaling system; Pertussis; Aldosterone synthesis and secretion; Inflammatory mediator regulation of TRP channels; GnRH signaling pathway; Vascular smooth muscle contraction; Renin secretion; Oxytocin signaling pathway; Glioma; Glucagon signaling pathway; Alzheimer's dise…	Common Pathways Underlying Drug Addiction; Alzheimers Disease; T-Cell Receptor and Co-stimulatory Signaling; Physiological and Pathological Hypertrophy of the Heart; Endochondral Ossification; Calcium Regulation in the Cardiac Cell; Myometrial Relaxation and Contraction Pathways; Melatonin metabolism and effects; Endothelin Pathways; Cardiac Hypertrophic Response; MicroRNAs in cardiomyocyte hyper…	0	108.4	11.9297	171.867	36.593	57.8333	44.0771	124.433	35.7583	84.1667	58.0017	53.2667	9.36857	1.58549	0.533518	0.6764	0.428074			100.1	101.8
FALSE	High	Master Protein	P12004	Proliferating cell nuclear antigen OS=Homo sapiens GN=PCNA PE=1 SV=1	0	99.067	59	13	85	13	1	261	28.8	4.69	14737.7	109.33	13	13	cell differentiation;cell organization and biogenesis;cell proliferation;cellular homeostasis;metabolic process;regulation of biological process;response to stimulus	nucleus	catalytic activity;DNA binding;enzyme regulator activity;protein binding	Pf00705, Pf02747	5111	ENSG00000132646.10	PCNA	20	Mismatch repair; Nucleotide excision repair; Hepatitis B; Base excision repair; DNA replication; Cell cycle; HTLV-I infection	DNA Replication; Cell Cycle; Oxidative Damage; Mismatch repair; Senescence and Autophagy in Cancer; EGF/EGFR Signaling Pathway; G1 to S cell cycle control; Primary Focal Segmental Glomerulosclerosis FSGS; Retinoblastoma (RB) in Cancer	0	112	8.55514	109.1	11.3068	82.5333	24.5029	117.367	11.8718	97.1	12.3395	81.8333	14.1194	0.974107	0.736905	0.827322	0.697245			122	102.9
FALSE	High	Master Protein	P58107	Epiplakin OS=Homo sapiens GN=EPPK1 PE=1 SV=2	0	98.561	20	19	72	17	1	5090	555.3	5.6	11907.5	80.27	18	19	cell organization and biogenesis;regulation of biological process;response to stimulus	cytoplasm;cytoskeleton;membrane	protein binding;RNA binding	Pf00681	83481		EPPK1	8			3	103.367	30.3289	105.867	7.41263	152.467	47.4871	68.9	30.2671	88.2	41.8372	81.2333	8.42178	1.02419	1.47501	1.28012	1.179			83.4	87.2
FALSE	High	Master Protein	Q92841	Probable ATP-dependent RNA helicase DDX17 OS=Homo sapiens GN=DDX17 PE=1 SV=2	0	98.032	25	19	103	12	1	729	80.2	8.27	17282	117.81	19	18	cell differentiation;cell organization and biogenesis;defense response;metabolic process;regulation of biological process;response to stimulus	cytoplasm;cytosol;membrane;nucleus	catalytic activity;nucleotide binding;protein binding;RNA binding	Pf00270, Pf00271	10521	ENSG00000100201.20	DDX17	22		RIG-I-like Receptor Signaling	0	94.2667	13.4876	85.2667	20.3473	90.1	18.5549	106.667	17.2791	119.1	6.75316	104.633	12.8299	0.904526	0.955799	1.11656	0.980937			80	98.4
FALSE	High	Master Protein	P55884-2	Isoform 2 of Eukaryotic translation initiation factor 3 subunit B OS=Homo sapiens GN=EIF3B	0	97.882	26	19	64	19	1	873	99	5.08	11147.9	67.38	19	19	metabolic process;regulation of biological process	cytosol	protein binding;RNA binding;structural molecule activity	Pf00076, Pf08662, Pf13893, Pf14259	8662		EIF3B	7		Translation Factors	0	155.6	35.9532	90.0667	7.97117	90.2667	20.4326	76.1333	26.6059	94.2667	12.2249	93.6667	32.4363	0.578835	0.58012	1.23818	1.2303			217.8	109.4
FALSE	High	Master Protein	P15924	Desmoplakin OS=Homo sapiens GN=DSP PE=1 SV=3	0	97.6	10	24	65	24	1	2871	331.6	6.81	9677.31	67.06	24	24	cell death;cell differentiation;cell organization and biogenesis;metabolic process;regulation of biological process;response to stimulus;transport	cytoplasm;cytoskeleton;membrane;nucleus	catalytic activity;motor activity;protein binding;RNA binding;structural molecule activity	Pf00038, Pf00681, Pf01540, Pf01576, Pf02463, Pf04111, Pf04156, Pf05483, Pf05557, Pf05622, Pf06008, Pf06160, Pf06637, Pf07888, Pf10174, Pf12072, Pf12128, Pf13166	1832	ENSG00000096696.13	DSP	6	Arrhythmogenic right ventricular cardiomyopathy (ARVC)	Lung fibrosis; Arrhythmogenic Right Ventricular Cardiomyopathy	0	93.1333	30.2026	99.2667	9.44279	151.733	51.8677	69.9	14.3083	94.3333	20.0598	91.6667	34.7753	1.06586	1.62921	1.34955	1.3114			113.3	105.1
FALSE	High	Master Protein	Q04637-9	Isoform 9 of Eukaryotic translation initiation factor 4 gamma 1 OS=Homo sapiens GN=EIF4G1	0	97.577	19	27	82	23	1	1606	176.1	5.34	11939.7	60.68	27	25	cell organization and biogenesis;defense response;metabolic process;regulation of biological process;response to stimulus	cytoplasm;cytosol;membrane;nucleus	nucleotide binding;protein binding;RNA binding;structural molecule activity	Pf00566, Pf02020, Pf02847, Pf02854	1981	ENSG00000114867.20	EIF4G1	3		Translation Factors	4	101.967	23.8029	94.1	4.09932	89.4667	21.9501	109.2	28.8092	103.6	22.9375	101.7	20.2153	0.922851	0.877411	0.948718	0.931319			78.3	100.8
FALSE	High	Master Protein	P10515	Dihydrolipoyllysine-residue acetyltransferase component of pyruvate dehydrogenase complex, mitochondrial OS=Homo sapiens GN=DLAT PE=1 SV=3	0	97.478	25	15	103	15	1	647	69	7.84	17099.6	130.62	14	14	metabolic process;regulation of biological process	mitochondrion;organelle lumen	catalytic activity;protein binding	Pf00198, Pf00364, Pf02817	1737	ENSG00000150768.15	DLAT	11	Pyruvate metabolism; Metabolic pathways; Carbon metabolism; Glycolysis / Gluconeogenesis; Citrate cycle (TCA cycle)	Glycolysis and Gluconeogenesis; TCA Cycle and Deficiency of Pyruvate Dehydrogenase complex (PDHc)	0	134.633	34.3004	60.2667	26.4684	76.3333	15.2834	166.367	32.3617	95.6667	6.09895	66.7667	2.63848	0.447636	0.566972	0.575035	0.401322			81.5	157.3
FALSE	High	Master Protein	P05023	Sodium/potassium-transporting ATPase subunit alpha-1 OS=Homo sapiens GN=ATP1A1 PE=1 SV=1	0	97.279	22	18	67	18	1	1023	112.8	5.49	11178.7	69.61	18	17	cell communication;cellular homeostasis;metabolic process;regulation of biological process;response to stimulus;transport	endoplasmic reticulum;endosome;Golgi;membrane	catalytic activity;metal ion binding;nucleotide binding;protein binding;transporter activity	Pf00122, Pf00689, Pf00690, Pf00702, Pf08282, Pf12710, Pf13246	476	ENSG00000163399.15	ATP1A1	1	Gastric acid secretion; Adrenergic signaling in cardiomyocytes; Protein digestion and absorption; Cardiac muscle contraction; Aldosterone-regulated sodium reabsorption; Thyroid hormone signaling pathway; cGMP-PKG signaling pathway; Thyroid hormone synthesis; cAMP signaling pathway; Insulin secretion; Salivary secretion; Proximal tubule bicarbonate reclamation; Carbohydrate digestion and absorptio…	Preimplantation Embryo	0	96.1667	30.9355	101.333	28.9662	99.4	30.0886	108.267	15.1794	109.867	23.3773	85	11.8975	1.05373	1.03362	1.01478	0.785099			74.1	84.4
FALSE	High	Master Protein	P50454	Serpin H1 OS=Homo sapiens GN=SERPINH1 PE=1 SV=2	0	96.971	45	15	71	15	1	418	46.4	8.69	12427.5	86.53	15	15	cell organization and biogenesis;metabolic process;regulation of biological process;response to stimulus	cytoplasm;endoplasmic reticulum;membrane;organelle lumen	enzyme regulator activity;protein binding;RNA binding	Pf00079	871	ENSG00000149257.13	SERPINH1	11		Endochondral Ossification	0	83.8667	7.23949	94.5	15.3855	92.5333	5.19332	111.1	10.4282	123.233	16.0247	94.8	21.176	1.12679	1.10334	1.10921	0.853285			81.3	79.5
FALSE	High	Master Protein	P35232	Prohibitin OS=Homo sapiens GN=PHB PE=1 SV=1	0	96.45	61	15	87	15	1	272	29.8	5.76	14687.7	89.95	15	15	cell differentiation;cell organization and biogenesis;metabolic process;regulation of biological process;response to stimulus;transport	cell surface;cytoplasm;endosome;membrane;mitochondrion;nucleus	DNA binding;protein binding	Pf01145	5245	ENSG00000167085.11	PHB	17		Integrated Breast Cancer Pathway	0	110.033	56.9954	106.133	33.1965	87.5	20.195	159.5	13.1913	66.8	11.1534	69.9667	6.03059	0.964556	0.795214	0.418809	0.438662			37.8	141.7
FALSE	High	Master Protein	Q12904-2	Isoform 2 of Aminoacyl tRNA synthase complex-interacting multifunctional protein 1 OS=Homo sapiens GN=AIMP1	0	95.997	54	16	83	16	1	336	37	8.65	13690.4	86.25	16	16	cell communication;cell death;cellular component movement;defense response;metabolic process;regulation of biological process;response to stimulus	cell surface;cytosol;endoplasmic reticulum;Golgi;membrane;nucleus	protein binding;RNA binding	Pf01588	9255	ENSG00000164022.16	AIMP1	4			0	167.333	14.5999	66.0333	20.7876	70.9667	20.7371	143.433	20.2185	92.7	1.41065	59.5667	17.4742	0.394622	0.424104	0.646293	0.415292			139.2	183.2
FALSE	High	Master Protein	O43143	Pre-mRNA-splicing factor ATP-dependent RNA helicase DHX15 OS=Homo sapiens GN=DHX15 PE=1 SV=2	0	95.887	25	19	94	18	1	795	90.9	7.46	17212.8	106.16	19	18	metabolic process;response to stimulus	cytoplasm;nucleus;spliceosomal complex	catalytic activity;nucleotide binding;protein binding;RNA binding	Pf00270, Pf00271, Pf04408, Pf07717, Pf13401	1665	ENSG00000109606.12	DHX15	4	Spliceosome	mRNA Processing	1	94.6	8.26352	93.8667	11.5058	98.3667	20.1301	93.9333	12.5139	113.033	2.24568	106.233	8.86312	0.992248	1.03982	1.20334	1.13094			94	87.1
FALSE	High	Master Protein	P39019	40S ribosomal protein S19 OS=Homo sapiens GN=RPS19 PE=1 SV=2	0	95.887	61	15	147	15	1	145	16.1	10.32	27709.2	163.01	15	15	cell differentiation;cell organization and biogenesis;cellular component movement;defense response;metabolic process;regulation of biological process;response to stimulus;transport	cytoplasm;cytosol;membrane;nucleus;ribosome	protein binding;RNA binding;structural molecule activity	Pf01090	6223	ENSG00000105372.6	RPS19	19	Ribosome	Cytoplasmic Ribosomal Proteins	0	70.5	32.0002	75.1667	11.196	139.667	9.80837	92.4333	22.1679	86.7	29.6667	135.467	5.79811	1.06619	1.98109	0.937973	1.46556			44.5	84.9
FALSE	High	Master Protein	Q99873	Protein arginine N-methyltransferase 1 OS=Homo sapiens GN=PRMT1 PE=1 SV=2	0	95.249	45	15	77	15	1	361	41.5	5.43	13511.9	95.35	14	15	cell organization and biogenesis;metabolic process;regulation of biological process;response to stimulus	cytoplasm;cytosol;nucleus	catalytic activity;DNA binding;nucleotide binding;protein binding;RNA binding	Pf05175, Pf06325, Pf08241, Pf12847, Pf13649, Pf13847	3276		PRMT1	19	FoxO signaling pathway; Glucagon signaling pathway	Tryptophan metabolism; Interferon type I signaling pathways; mRNA Processing; Energy Metabolism	0	110.467	8.03806	98.5667	11.1046	83.5333	25.2705	110.2	29.8171	100.233	8.11576	96.9667	28.9864	0.892275	0.756186	0.909558	0.879915			120.7	104.8
FALSE	High	Master Protein	Q6PKG0	La-related protein 1 OS=Homo sapiens GN=LARP1 PE=1 SV=2	0	95.196	25	23	86	23	1	1096	123.4	8.82	12248.6	71.32	22	23	cell proliferation;metabolic process;regulation of biological process;response to stimulus	cytoplasm;membrane	protein binding;RNA binding;translation regulator activity	Pf05383	23367		LARP1	5			0	63.8667	18.2008	118.1	21.9296	124.967	10.6478	74.7667	26.5163	97.4333	10.6311	120.833	14.4229	1.84916	1.95668	1.30317	1.61614			52.7	75.9
FALSE	High	Master Protein	P61313	60S ribosomal protein L15 OS=Homo sapiens GN=RPL15 PE=1 SV=2	0	94.864	39	8	117	8	1	204	24.1	11.62	19865.9	128.29	8	7	cell organization and biogenesis;metabolic process;response to stimulus;transport	cytosol;membrane;nucleus;ribosome	protein binding;RNA binding;structural molecule activity	Pf00827	6138	ENSG00000174748.18	RPL15	3	Ribosome	Cytoplasmic Ribosomal Proteins	0	42.6667	41.1903	95.6333	3.514	132.767	7.30502	67.0333	19.7105	95.5	1.48455	166.333	13.8278	2.24141	3.11172	1.42466	2.48135			22.4	51.9
FALSE	High	Master Protein	P18669	Phosphoglycerate mutase 1 OS=Homo sapiens GN=PGAM1 PE=1 SV=2	0	94.586	59	12	82	12	1	254	28.8	7.18	14803.2	106.56	12	12	metabolic process;regulation of biological process;transport	cytoplasm;cytosol;extracellular;membrane;organelle lumen	catalytic activity;protein binding	Pf00300	5223; 643576	ENSG00000171314.8	PGAM1; LOC643576	10; 12	Glucagon signaling pathway; Central carbon metabolism in cancer; Biosynthesis of amino acids; Glycine, serine and threonine metabolism; Metabolic pathways; Glycolysis / Gluconeogenesis; Carbon metabolism	Cori Cycle; Glycolysis and Gluconeogenesis	0	99.8	34.4449	88.7667	24.1579	86	28.2115	119.9	33.5445	123.933	14.1958	81.6	10.0513	0.889446	0.861723	1.03364	0.680567			125.7	60.8
FALSE	High	Master Protein	P10412	Histone H1.4 OS=Homo sapiens GN=HIST1H1E PE=1 SV=2	0	94.505	45	18	135	4	1	219	21.9	11.03	26062.5	161.44	18	17	cell organization and biogenesis;metabolic process;regulation of biological process	chromosome;nucleus	DNA binding;metal ion binding;nucleotide binding;protein binding;RNA binding	Pf00538	3008	ENSG00000168298.6	HIST1H1E	6		Pathways Affected in Adenoid Cystic Carcinoma	14	148	16.9993	128.267	13.9599	77.8333	37.8338	86.8667	46.8827	93.5	19.7496	65.5667	26.6369	0.866667	0.525901	1.07636	0.754797			176.8	130.3
FALSE	High	Master Protein	Q9H0U4	Ras-related protein Rab-1B OS=Homo sapiens GN=RAB1B PE=1 SV=1	0	94.503	70	13	87	6	1	201	22.2	5.73	15051	111.8	13	13	cell organization and biogenesis;metabolic process;regulation of biological process;response to stimulus;transport	cytoplasm;cytosol;Golgi;membrane;mitochondrion	catalytic activity;nucleotide binding;protein binding	Pf00025, Pf00071, Pf01926, Pf04670, Pf08477, Pf09439	81876	ENSG00000174903.15	RAB1B	11	Legionellosis		7	141.267	26.6289	116	24.5246	86.7667	7.57014	102.967	31.1025	81.9667	23.2802	71.0333	26.0324	0.821142	0.614205	0.796051	0.689867			184.6	117
FALSE	High	Master Protein	P14866	Heterogeneous nuclear ribonucleoprotein L OS=Homo sapiens GN=HNRNPL PE=1 SV=2	0	93.91	32	13	89	13	1	589	64.1	8.22	14632.1	110.15	13	13	metabolic process;regulation of biological process	cytoplasm;membrane;nucleus	DNA binding;protein binding;RNA binding	Pf00076, Pf13893, Pf14259	3191	ENSG00000282947.1; ENSG00000104824.16	HNRNPL	19; CHR_HG26_PATCH		mRNA Processing	0	110.3	5.33982	88.0333	10.8184	84.1	25.5391	103.933	32.2022	122.6	1.42915	90.9667	9.60639	0.798126	0.762466	1.1796	0.875241			113.8	103.5
FALSE	High	Master Protein	P16403	Histone H1.2 OS=Homo sapiens GN=HIST1H1C PE=1 SV=2	0	93.648	42	16	137	3	1	213	21.4	10.93	26635.3	166.99	16	16	cell organization and biogenesis;metabolic process;regulation of biological process	chromosome;nucleus	DNA binding;protein binding;RNA binding	Pf00538	3006	ENSG00000187837.3	HIST1H1C	6			0	191.4	49.5812	113.367	15.2003	72.5	61.6404	88.4333	48.3769	74.5	51.6998	59.8333	38.6908	0.592302	0.378788	0.842443	0.676593			299.3	120.9
FALSE	High	Master Protein	P62826	GTP-binding nuclear protein Ran OS=Homo sapiens GN=RAN PE=1 SV=3	0	93.387	44	11	80	11	1	216	24.4	7.49	15416	101.98	11	11	cell division;cell organization and biogenesis;metabolic process;regulation of biological process;response to stimulus;transport	chromosome;cytoplasm;cytosol;endosome;membrane;nucleus	catalytic activity;metal ion binding;nucleotide binding;protein binding;RNA binding;transporter activity	Pf00025, Pf00071, Pf08477	5901	ENSG00000132341.11	RAN	12	HTLV-I infection; Epstein-Barr virus infection; RNA transport; Ribosome biogenesis in eukaryotes	miRNA Biogenesis; Androgen receptor signaling pathway	0	139.033	5.32943	106.3	4.68104	74.0333	8.58156	110.667	15.9918	96.9333	7.30085	72.9667	8.9506	0.764565	0.532486	0.875904	0.659337			147.4	136.4
FALSE	High	Master Protein	P62280	40S ribosomal protein S11 OS=Homo sapiens GN=RPS11 PE=1 SV=3	0	93.185	64	18	132	18	1	158	18.4	10.3	22379	129.24	18	18	cell differentiation;cell organization and biogenesis;metabolic process;transport	cytoplasm;cytosol;membrane;ribosome	protein binding;RNA binding;structural molecule activity	Pf00366	6205	ENSG00000142534.6	RPS11	19	Ribosome	Cytoplasmic Ribosomal Proteins	0	73.8	30.7812	62.6333	26.5368	143.333	23.4454	83.2667	32.8243	96.7333	48.5547	140.267	13.5156	0.84869	1.94219	1.16173	1.68455			56.8	99.6
FALSE	High	Master Protein	Q13162	Peroxiredoxin-4 OS=Homo sapiens GN=PRDX4 PE=1 SV=1	0	92.934	49	11	87	9	1	271	30.5	6.29	16663.3	127.94	11	11	cell organization and biogenesis;cellular homeostasis;metabolic process;regulation of biological process;transport	cytoplasm;cytosol;endoplasmic reticulum;extracellular;mitochondrion;nucleus;organelle lumen	antioxidant activity;catalytic activity;protein binding	Pf00578, Pf08534, Pf10417	10549	ENSG00000123131.12	PRDX4	X		Selenium Micronutrient Network	0	114.7	11.4337	105.133	4.51816	88.9333	15.9533	101.867	6.66407	91.7667	12.422	97.6333	10.0095	0.916594	0.775356	0.900851	0.958442			109	105.4
FALSE	High	Master Protein	Q8NC51	Plasminogen activator inhibitor 1 RNA-binding protein OS=Homo sapiens GN=SERBP1 PE=1 SV=2	0	92.49	41	16	89	16	1	408	44.9	8.65	16737.5	92.89	16	16	regulation of biological process	cytoplasm;cytosol;membrane;nucleus	protein binding;RNA binding	Pf04774	26135	ENSG00000142864.14	SERBP1	1		Apoptosis-related network due to altered Notch3 in ovarian cancer	0	150.333	13.2875	125.567	19.7521	71.8333	44.0251	100.167	20.0289	95.1	11.3482	56.9667	33.7507	0.835255	0.477827	0.949418	0.568719			173.3	140.7
FALSE	High	Master Protein	Q14240-2	Isoform 2 of Eukaryotic initiation factor 4A-II OS=Homo sapiens GN=EIF4A2	0	91.918	27	12	104	1	1	408	46.5	5.48	17794.4	100.97	12	12	metabolic process;regulation of biological process	cytosol	catalytic activity;DNA binding;nucleotide binding;protein binding;RNA binding	Pf00270, Pf00271, Pf04851	1974	ENSG00000156976.16	EIF4A2	3		Translation Factors	0	316.5	57.735	370.6	57.735	340.7	57.735	592.1	57.735	553.8	57.735	226.4	57.735	1.17093	1.07646	0.935315	0.382368
FALSE	High	Master Protein	P46782	40S ribosomal protein S5 OS=Homo sapiens GN=RPS5 PE=1 SV=4	0	91.917	41	9	146	9	1	204	22.9	9.72	24430.7	141.19	9	9	cell organization and biogenesis;metabolic process;regulation of biological process;transport	cytosol;membrane;ribosome	protein binding;RNA binding;structural molecule activity	Pf00177	6193	ENSG00000083845.8	RPS5	19	Ribosome	Cytoplasmic Ribosomal Proteins	0	69.0333	32.3059	64.2	24.8866	148.933	35.6153	95.7667	39.0013	96.1	36.0943	125.933	20.9685	0.929986	2.15741	1.00348	1.315			46.9	91.5
FALSE	High	Master Protein	P09429	High mobility group protein B1 OS=Homo sapiens GN=HMGB1 PE=1 SV=3	0	91.68	39	15	91	14	1	215	24.9	5.74	14278	106.96	15	14	cell differentiation;cell organization and biogenesis;cell proliferation;cellular component movement;cellular homeostasis;defense response;metabolic process;regulation of biological process;response to stimulus;transport	cell surface;chromosome;cytoplasm;endosome;extracellular;membrane;nucleus;organelle lumen	catalytic activity;DNA binding;enzyme regulator activity;protein binding;RNA binding	Pf00505, Pf09011	3146	ENSG00000189403.14	HMGB1	13	Base excision repair	DNA Damage Response (only ATM dependent); Retinoblastoma (RB) in Cancer	1	141.767	27.0169	140.367	34.2395	66.9667	54.5866	102.067	22.9279	87.3333	36.0513	61.5	27.8476	0.990125	0.472372	0.85565	0.602547			185.7	115.4
FALSE	High	Master Protein	P40939	Trifunctional enzyme subunit alpha, mitochondrial OS=Homo sapiens GN=HADHA PE=1 SV=2	0	91.54	33	20	82	20	1	763	82.9	9.04	13857.7	112.45	20	20	metabolic process;response to stimulus	membrane;mitochondrion	catalytic activity;nucleotide binding;protein binding	Pf00378, Pf00725, Pf02737	3030	ENSG00000084754.10	HADHA	2	Metabolic pathways; beta-Alanine metabolism; Propanoate metabolism; Tryptophan metabolism; Fatty acid elongation; Carbon metabolism; Butanoate metabolism; Fatty acid metabolism; Valine, leucine and isoleucine degradation; Biosynthesis of unsaturated fatty acids; Lysine degradation; Fatty acid degradation	Mitochondrial LC-Fatty Acid Beta-Oxidation; Sudden Infant Death Syndrome (SIDS) Susceptibility Pathways; Fatty Acid Beta Oxidation; Valproic acid pathway	0	121.433	24.6269	98.3	1.22075	90.3667	13.8145	107.167	6.80692	102.133	18.3534	80.6333	8.46994	0.809498	0.744167	0.953033	0.752411			135.4	87.1
FALSE	High	Master Protein	P46940	Ras GTPase-activating-like protein IQGAP1 OS=Homo sapiens GN=IQGAP1 PE=1 SV=1	0	91.522	15	19	69	18	1	1657	189.1	6.48	11037.8	77.21	18	19	cell growth;regulation of biological process;response to stimulus;transport	cytoplasm;cytoskeleton;cytosol;membrane;nucleus	enzyme regulator activity;metal ion binding;protein binding	Pf00307, Pf00397, Pf00616, Pf03836, Pf11016	8826	ENSG00000140575.12	IQGAP1	15	Regulation of actin cytoskeleton; Adherens junction; Proteoglycans in cancer	EGF/EGFR Signaling Pathway; G13 Signaling Pathway; Regulation of Actin Cytoskeleton; VEGFA-VEGFR2 Signaling Pathway	1	97.4	16.1788	110.867	16.2938	86.9	7.59058	104.767	7.87585	103	32.393	97.0667	2.73024	1.13826	0.892197	0.983137	0.926503			115	84.6
FALSE	High	Master Protein	P23284	Peptidyl-prolyl cis-trans isomerase B OS=Homo sapiens GN=PPIB PE=1 SV=2	0	91.43	54	14	92	14	1	216	23.7	9.41	16481.1	121.34	14	14	metabolic process;regulation of biological process	endoplasmic reticulum;membrane;nucleus;organelle lumen	catalytic activity;protein binding;RNA binding	Pf00160	5479	ENSG00000166794.4	PPIB	15		Prolactin Signaling Pathway	0	132.833	7.12615	121	19.2737	71.9	15.0832	121.7	7.40755	87.2333	16.5715	65.3667	10.4794	0.910916	0.54128	0.71679	0.537113			132.2	123.7
FALSE	High	Master Protein	P49792	E3 SUMO-protein ligase RanBP2 OS=Homo sapiens GN=RANBP2 PE=1 SV=2	0	91.285	9	24	73	24	1	3224	358	6.2	12105.5	100.6	23	24	cell organization and biogenesis;metabolic process;regulation of biological process;response to stimulus;transport	cytoplasm;cytosol;membrane;mitochondrion;nucleus	catalytic activity;enzyme regulator activity;metal ion binding;protein binding;RNA binding	Pf00160, Pf00515, Pf00638, Pf00641, Pf07719, Pf12185, Pf13414, Pf13432, Pf14559	5903	ENSG00000153201.15	RANBP2	2	RNA transport		0	110.067	21.7664	94.2333	6.41504	98.6667	21.86	89.8667	28.4954	123.267	26.121	83.9333	12.2278	0.856148	0.896426	1.37166	0.933976			130.5	83.7
FALSE	High	Master Protein	Q9HCE1	Putative helicase MOV-10 OS=Homo sapiens GN=MOV10 PE=1 SV=2	0	91.235	24	21	76	21	1	1003	113.6	8.82	12365.9	79.97	21	21	metabolic process;regulation of biological process;response to stimulus	cytoplasm;cytosol	catalytic activity;nucleotide binding;protein binding;RNA binding	Pf13086, Pf13087, Pf13245, Pf13401, Pf13604	4343	ENSG00000155363.18	MOV10	1			0	41.1333	37.0571	83.1333	12.7485	128.533	14.9435	48.1	20.2433	105.433	15.497	193.633	23.0528	2.02107	3.1248	2.19196	4.02564			27.9	57.8
FALSE	High	Master Protein	O95714	E3 ubiquitin-protein ligase HERC2 OS=Homo sapiens GN=HERC2 PE=1 SV=2	0	91.161	5	21	88	21	1	4834	526.9	6.28	13726.5	100.14	21	21	metabolic process;response to stimulus;transport	cytoplasm;cytoskeleton;membrane;nucleus	catalytic activity;metal ion binding;protein binding	Pf00173, Pf00415, Pf00569, Pf00632, Pf03256, Pf06701, Pf11515, Pf13540	8924	ENSG00000128731.15	HERC2	15	Ubiquitin mediated proteolysis		0	107.667	31.8992	92.1333	2.96318	89.7667	22.7049	108.633	21.3763	121.667	14.412	80.1	20.726	0.855728	0.833746	1.11998	0.737343			91.6	84.3
FALSE	High	Master Protein	P02786	Transferrin receptor protein 1 OS=Homo sapiens GN=TFRC PE=1 SV=2	0	91.085	27	19	68	19	1	760	84.8	6.61	11723.6	94.04	19	19	cell differentiation;cell organization and biogenesis;cellular homeostasis;metabolic process;regulation of biological process;response to stimulus;transport	cell surface;endosome;extracellular;membrane	protein binding;receptor activity;RNA binding;transporter activity	Pf02225, Pf04253, Pf04389	7037	ENSG00000072274.12	TFRC	3	HIF-1 signaling pathway; Hematopoietic cell lineage; Endocytosis; Phagosome	Iron metabolism in placenta	0	90.8667	19.2971	95.2667	34.0843	81.5667	19.0973	115.033	19.3996	108.8	22.5813	108.4	2.23887	1.04842	0.897652	0.945813	0.942336			71.8	94.5
FALSE	High	Master Protein	P05141	ADP/ATP translocase 2 OS=Homo sapiens GN=SLC25A5 PE=1 SV=7	0	90.607	50	17	114	4	1	298	32.8	9.69	20970.5	133.45	17	16	regulation of biological process;transport	membrane;mitochondrion;nucleus	protein binding;RNA binding;transporter activity	Pf00153	292	ENSG00000005022.5	SLC25A5	X	Parkinson's disease; Huntington's disease; Calcium signaling pathway; HTLV-I infection; cGMP-PKG signaling pathway	Electron Transport Chain	13	75.6	50.2842	90.1667	11.4111	102	2.63249	134.8	34.1457	98.6	10.8987	98.8333	5.79679	1.19268	1.34921	0.731454	0.733185			34.5	109.5
FALSE	High	Master Protein	Q9UJZ1	Stomatin-like protein 2, mitochondrial OS=Homo sapiens GN=STOML2 PE=1 SV=1	0	90.477	52	12	52	12	1	356	38.5	7.39	8011.59	46.27	12	12	cell organization and biogenesis;cellular homeostasis;metabolic process;regulation of biological process;response to stimulus;transport	cytoplasm;cytoskeleton;membrane;mitochondrion	protein binding	Pf01145	30968	ENSG00000165283.15	STOML2	9			0	243	59.5245	144.75	59.216	134.9	58.3939	310	58.3318	257.05	62.4886	110.3	60.879	0.595679	0.555144	0.829194	0.355806				278.2
FALSE	High	Master Protein	P05386	60S acidic ribosomal protein P1 OS=Homo sapiens GN=RPLP1 PE=1 SV=1	0	90.27	52	2	114	2	1	114	11.5	4.32	21933.2	148.51	2	2	cell organization and biogenesis;metabolic process;regulation of biological process;transport	cytosol;ribosome	enzyme regulator activity;protein binding;structural molecule activity	Pf00428	6176	ENSG00000137818.11	RPLP1	15	Ribosome	Cytoplasmic Ribosomal Proteins	0	67.2	26.3405	107.167	29.6576	124	11.3875	73.8	23.1755	127.633	29.7911	100.233	36.1172	1.59474	1.84524	1.72945	1.35818			74.6	47
FALSE	High	Master Protein	P62241	40S ribosomal protein S8 OS=Homo sapiens GN=RPS8 PE=1 SV=2	0	89.625	51	10	131	10	1	208	24.2	10.32	19237.8	111.52	10	10	cell organization and biogenesis;metabolic process;transport	cytoplasm;cytosol;endoplasmic reticulum;membrane;nucleus;ribosome	protein binding;RNA binding;structural molecule activity	Pf01201	6202	ENSG00000142937.11	RPS8	1	Ribosome	Cytoplasmic Ribosomal Proteins	0	69.2333	25.4763	75.0667	18.7499	134.267	6.90057	89.8667	18.9889	82.2667	16.0483	149.267	10.4284	1.08426	1.93934	0.91543	1.66098			52.7	87.8
FALSE	High	Master Protein	P78347	General transcription factor II-I OS=Homo sapiens GN=GTF2I PE=1 SV=2	0	89.129	21	20	62	20	1	998	112.3	6.39	9793.01	68.39	20	20	cellular homeostasis;metabolic process;regulation of biological process;response to stimulus	cytoplasm;membrane;nucleus	DNA binding;protein binding	Pf02946	2969	ENSG00000263001.5	GTF2I	7	cGMP-PKG signaling pathway; Herpes simplex infection; Basal transcription factors	B Cell Receptor Signaling Pathway	0	92.2667	19.5148	87.5667	1.60421	98.8667	14.0066	108.133	26.0741	115.833	12.4748	97.3333	2.47714	0.949061	1.07153	1.07121	0.900123			72.9	95.4
FALSE	High	Master Protein	Q13428-4	Isoform 4 of Treacle protein OS=Homo sapiens GN=TCOF1	0	89.092	14	20	75	20	1	1524	155.8	8.95	12171.6	84.19	20	20	cell organization and biogenesis;regulation of biological process;transport	cytosol;nucleus	protein binding;RNA binding;transporter activity	Pf03546	6949		TCOF1	5			0	117.167	24.494	118.1	21.1832	82.9333	27.8253	83.6667	9.61043	110.633	14.8296	87.5667	22.964	1.00797	0.707824	1.32231	1.04661			149.2	108.5
FALSE	High	Master Protein	Q13838-2	Isoform 2 of Spliceosome RNA helicase DDX39B OS=Homo sapiens GN=DDX39B	0	88.764	46	16	80	8	1	443	50.6	5.88	14165.4	97.1	16	16	cell organization and biogenesis;metabolic process;regulation of biological process;transport	cytoplasm;nucleus;spliceosomal complex	catalytic activity;nucleotide binding;protein binding;RNA binding	Pf00270, Pf00271, Pf14617	7919		DDX39B	6			8	93.0333	6.77887	106.667	3.37022	78.9333	15.2324	121.167	18.5477	105.767	10.347	94.4667	10.2334	1.14654	0.848441	0.872902	0.779642			86.9	99.5
FALSE	High	Master Protein	P28838	Cytosol aminopeptidase OS=Homo sapiens GN=LAP3 PE=1 SV=3	0	88.548	34	12	69	12	1	519	56.1	7.93	12634.5	89.25	12	12	metabolic process	cytoplasm;cytosol;mitochondrion;nucleus	catalytic activity;metal ion binding	Pf00883, Pf02789	51056	ENSG00000002549.12	LAP3	4	Arginine and proline metabolism; Glutathione metabolism; Metabolic pathways		0	118.733	11.5726	93.3333	11.6507	88.5333	11.4635	104.467	9.21758	104.367	11.7711	90.4667	16.5473	0.786075	0.745649	0.999043	0.865986			123.7	103.2
FALSE	High	Master Protein	P24534	Elongation factor 1-beta OS=Homo sapiens GN=EEF1B2 PE=1 SV=3	0	88.014	56	14	103	10	1	225	24.7	4.67	18208.3	115.9	14	13	metabolic process;response to stimulus	cytoplasm;cytosol;endoplasmic reticulum;nucleus	protein binding;RNA binding	Pf00736, Pf14497	1933	ENSG00000283391.1; ENSG00000114942.13	EEF1B2	2; CHR_HSCHR2_6_CTG7_2		Translation Factors	0	157.167	25.5958	144.233	12.688	69.6	22.776	91.5333	35.3369	75.7667	29.4281	61.7333	20.4388	0.917709	0.442842	0.827749	0.674436			202.1	124.5
FALSE	High	Master Protein	P54886	Delta-1-pyrroline-5-carboxylate synthase OS=Homo sapiens GN=ALDH18A1 PE=1 SV=2	0	87.665	26	16	74	16	1	795	87.2	7.12	12463	78.83	16	15	metabolic process	cytoplasm;cytosol;membrane;mitochondrion	catalytic activity;nucleotide binding;protein binding;RNA binding	Pf00171, Pf00696	5832	ENSG00000059573.8	ALDH18A1	10	Metabolic pathways; Arginine and proline metabolism; Biosynthesis of amino acids	Urea cycle and metabolism of amino groups; Amino Acid metabolism	0	117.233	4.14591	106.167	3.74088	81.6667	9.32088	109.033	13.8135	99.1	19.3241	86.7667	8.08105	0.905601	0.696616	0.908896	0.795781			117.6	112.2
FALSE	High	Master Protein	Q12931	Heat shock protein 75 kDa, mitochondrial OS=Homo sapiens GN=TRAP1 PE=1 SV=3	0	87.4	33	21	77	20	1	704	80.1	8.21	11948.5	73.67	21	21	metabolic process;regulation of biological process;response to stimulus	membrane;mitochondrion;organelle lumen	nucleotide binding;protein binding;RNA binding	Pf00183, Pf02518, Pf13589	10131	ENSG00000126602.10	TRAP1	16		TGF-beta Signaling Pathway; TNF alpha Signaling Pathway	0	90.9667	31.6615	115.967	10.5831	104.333	15.9452	108	7.04617	96.2333	13.753	84.5	12.7635	1.27483	1.14694	0.891049	0.782407			59.3	98
FALSE	High	Master Protein	P62847-4	Isoform 4 of 40S ribosomal protein S24 OS=Homo sapiens GN=RPS24	0	86.851	24	11	122	11	1	289	32.4	10.15	22333.9	130.18	11	11	cell organization and biogenesis;metabolic process;transport	cytosol;membrane;nucleus;ribosome	protein binding;RNA binding;structural molecule activity	Pf01282	6229	ENSG00000138326.18	RPS24	10		Cytoplasmic Ribosomal Proteins	0	75.9333	39.9018	77.0333	18.8522	123.8	13.6869	91.6667	25.794	90.7	28.321	140.833	6.12025	1.01449	1.63038	0.989455	1.53636			52	110
FALSE	High	Master Protein	P29144	Tripeptidyl-peptidase 2 OS=Homo sapiens GN=TPP2 PE=1 SV=4	0	86.669	15	18	62	18	1	1249	138.3	6.32	11113.4	83.21	17	18	metabolic process	cytoplasm;cytosol;nucleus	catalytic activity;protein binding	Pf00082, Pf12580, Pf13739	7174	ENSG00000134900.11	TPP2	13			0	92.6667	8.48776	71.8333	4.73591	85.4667	12.737	156.367	32.1303	116.633	14.6029	77.0333	29.8579	0.77518	0.922302	0.745896	0.492645			85.1	100.8
FALSE	High	Master Protein	P51149	Ras-related protein Rab-7a OS=Homo sapiens GN=RAB7A PE=1 SV=1	0	86.328	71	15	81	15	1	207	23.5	6.7	13927.5	101.77	15	14	cell organization and biogenesis;cellular homeostasis;metabolic process;regulation of biological process;response to stimulus;transport	cytoplasm;cytosol;endosome;Golgi;membrane;vacuole	catalytic activity;nucleotide binding;protein binding	Pf00025, Pf00071, Pf01926, Pf04670, Pf07728, Pf08477	7879	ENSG00000075785.12	RAB7A	3	Salmonella infection; Amoebiasis; Tuberculosis; Phagosome; Endocytosis		0	112.9	19.0607	121.5	21.3169	85.8	15.1152	109.433	12.2061	88.8	22.8642	81.6	8.30535	1.07617	0.759965	0.811453	0.745659			122.9	88.2
FALSE	High	Master Protein	P26038	Moesin OS=Homo sapiens GN=MSN PE=1 SV=3	0	86.238	37	24	78	14	1	577	67.8	6.4	12332.3	71.64	24	22	cell differentiation;cell organization and biogenesis;cell proliferation;cellular component movement;regulation of biological process;response to stimulus	cell surface;cytoplasm;cytoskeleton;cytosol;membrane;nucleus	protein binding;RNA binding;structural molecule activity	Pf00373, Pf00769, Pf09379, Pf09380	4478	ENSG00000147065.16	MSN	X	Leukocyte transendothelial migration; Measles; Proteoglycans in cancer; Regulation of actin cytoskeleton	AGE/RAGE pathway; Glial Cell Differentiation; Regulation of Actin Cytoskeleton	1	91.7667	22.7739	125.867	31.8317	81.6333	20.1872	120.5	22.9552	96.3333	31.5136	83.8667	12.9004	1.37159	0.889575	0.799447	0.695989			73.2	87.7
FALSE	High	Master Protein	Q15366-2	Isoform 2 of Poly(rC)-binding protein 2 OS=Homo sapiens GN=PCBP2	0	86.207	37	11	129	1	1	366	38.6	6.79	21857.9	172.79	11	11	defense response;metabolic process;regulation of biological process;response to stimulus	cytoplasm;cytosol;membrane;nucleus	DNA binding;protein binding;RNA binding	Pf00013, Pf13014	5094	ENSG00000197111.15	PCBP2	12		mRNA Processing	0	93.2667	35.115	92	23.5162	99.2333	20.5789	119.767	27.3792	109.233	1.80637	86.5333	29.4723	0.986419	1.06397	0.912051	0.722516			80.9	68.5
FALSE	High	Master Protein	Q9H9J2	39S ribosomal protein L44, mitochondrial OS=Homo sapiens GN=MRPL44 PE=1 SV=1	0	86.146	47	13	55	13	1	332	37.5	8.4	9327.32	59.69	13	13	cell organization and biogenesis;metabolic process	membrane;mitochondrion;nucleus;ribosome	catalytic activity;protein binding;RNA binding	Pf00636	65080	ENSG00000135900.3	MRPL44	2			0	216.85	62.0246	127.35	63.9596	96.5	63.2387	180.15	57.7552	108.2	57.992	70.95	57.8221	0.587272	0.445008	0.600611	0.393838				167.7
FALSE	High	Master Protein	Q15417	Calponin-3 OS=Homo sapiens GN=CNN3 PE=1 SV=1	0	85.82	41	11	80	10	1	329	36.4	6.05	13416.3	83.13	11	11	cell differentiation;cell organization and biogenesis;regulation of biological process	cytoskeleton;cytosol	protein binding	Pf00307, Pf00402	1266	ENSG00000117519.15	CNN3	1			1	122.633	22.531	107.833	13.8342	71.6333	29.4692	110.1	14.852	119.867	20.0626	67.9	23.747	0.879315	0.584126	1.08871	0.616712			140.4	90.8
FALSE	High	Master Protein	Q15181	Inorganic pyrophosphatase OS=Homo sapiens GN=PPA1 PE=1 SV=2	0	85.58	59	14	69	13	1	289	32.6	5.86	10571	65.7	14	13	metabolic process	cytoplasm;cytosol	catalytic activity;metal ion binding	Pf00719	5464	ENSG00000180817.11	PPA1	10	Oxidative phosphorylation		2	111.567	9.28133	117.4	13.3552	77.3667	9.45799	118.767	7.59019	102.067	8.77648	72.8333	16.6135	1.05229	0.693457	0.859388	0.613247			111.2	101.4
FALSE	High	Master Protein	Q16531	DNA damage-binding protein 1 OS=Homo sapiens GN=DDB1 PE=1 SV=1	0	85.52	19	21	90	21	1	1140	126.9	5.26	14117.4	95.1	21	20	cell organization and biogenesis;metabolic process;regulation of biological process;response to stimulus	cytoplasm;nucleus	DNA binding;protein binding	Pf03178, Pf10433	1642	ENSG00000167986.13	DDB1	11	Hepatitis B; Nucleotide excision repair; Ubiquitin mediated proteolysis; Viral carcinogenesis		0	104.9	27.66	118.333	22.6594	93.1333	10.4706	108.833	36.9843	88.1333	25.0323	86.7	11.5956	1.12806	0.88783	0.809801	0.796631			71.4	122.1
FALSE	High	Master Protein	P50395	Rab GDP dissociation inhibitor beta OS=Homo sapiens GN=GDI2 PE=1 SV=2	0	85.476	37	14	79	9	1	445	50.6	6.47	13089.3	72.85	14	14	metabolic process;regulation of biological process;response to stimulus;transport	cytoplasm;cytosol;extracellular;membrane;organelle lumen	catalytic activity;enzyme regulator activity;protein binding;RNA binding	Pf00996	2665	ENSG00000057608.16	GDI2	10			6	103.167	20.8987	124.3	22.7026	82.7667	6.07762	121.833	13.2314	85.4	17.7473	82.5	15.1428	1.20485	0.802262	0.700958	0.677155			79.7	107.7
FALSE	High	Master Protein	Q01813	ATP-dependent 6-phosphofructokinase, platelet type OS=Homo sapiens GN=PFKP PE=1 SV=2	0	85.168	23	16	66	14	1	784	85.5	7.55	11519.1	81.47	16	15	metabolic process	cytoplasm;cytosol;membrane;nucleus	catalytic activity;metal ion binding;nucleotide binding;protein binding	Pf00365	5214	ENSG00000067057.16	PFKP	10	Biosynthesis of amino acids; Pentose phosphate pathway; Central carbon metabolism in cancer; Glycolysis / Gluconeogenesis; Thyroid hormone signaling pathway; Metabolic pathways; Carbon metabolism; RNA degradation; AMPK signaling pathway; Fructose and mannose metabolism; Galactose metabolism	Cori Cycle; Glycolysis and Gluconeogenesis	2	109.4	17.3116	90.5	5.17217	78.6333	21.4441	114.2	15.0788	126.5	14.9733	80.7667	11.4327	0.827239	0.718769	1.10771	0.707239			118.8	87.6
FALSE	High	Master Protein	P12236	ADP/ATP translocase 3 OS=Homo sapiens GN=SLC25A6 PE=1 SV=4	0	85.119	50	16	97	1	1	298	32.8	9.74	17062.4	107.09	16	15	cell death;cell organization and biogenesis;regulation of biological process;response to stimulus;transport	membrane;mitochondrion;nucleus	protein binding;transporter activity	Pf00153	293	ENSG00000169100.13	SLC25A6	X|Y; X	Huntington's disease; Parkinson's disease; cGMP-PKG signaling pathway; Calcium signaling pathway; HTLV-I infection; Influenza A	Electron Transport Chain	2	71.6333	58.0558	104.133	10.3251	109.033	12.9199	138.133	26.8006	85.1	19.8513	92	4.89493	1.4537	1.5221	0.616071	0.666023			31.1	114.2
FALSE	High	Master Protein	O00299	Chloride intracellular channel protein 1 OS=Homo sapiens GN=CLIC1 PE=1 SV=4	0	84.918	47	10	58	10	1	241	26.9	5.17	9512.48	60.04	10	10	metabolic process;regulation of biological process;response to stimulus;transport	cytoplasm;membrane;mitochondrion;nucleus	catalytic activity;protein binding;transporter activity	Pf00043, Pf13409, Pf13410, Pf13417	1192	ENSG00000213719.8; ENSG00000206394.8; ENSG00000230685.6; ENSG00000226248.6; ENSG00000223639.6; ENSG00000226651.6; ENSG00000226417.6	CLIC1	6; CHR_HSCHR6_MHC_QBL_CTG1; CHR_HSCHR6_MHC_COX_CTG1; CHR_HSCHR6_MHC_DBB_CTG1; CHR_HSCHR6_MHC_SSTO_CTG1; CHR_HSCHR6_MHC_MANN_CTG1; CHR_HSCHR6_MHC_MCF_CTG1			0	140.633	25.1587	116	29.4904	65.1667	25.7144	127.5	4.87979	104.067	15.9873	46.6667	70.4613	0.82484	0.46338	0.816209	0.366013			177.9	107.5
FALSE	High	Master Protein	P09651	Heterogeneous nuclear ribonucleoprotein A1 OS=Homo sapiens GN=HNRNPA1 PE=1 SV=5	0	84.75	44	15	80	12	1	372	38.7	9.13	15529	99.38	15	15	cell communication;metabolic process;regulation of biological process;response to stimulus;transport	cytoplasm;membrane;nucleus;spliceosomal complex	DNA binding;protein binding;RNA binding	Pf00076, Pf13893, Pf14259	3178	ENSG00000135486.17	HNRNPA1	12	Spliceosome	mRNA Processing	0	115.467	0.950028	116.733	12.4334	73.8667	29.2827	101.133	23.1032	98.7333	23.6242	94.1	12.0984	1.01097	0.639723	0.976269	0.930455			114.2	116.1
FALSE	High	Master Protein	P35241-5	Isoform 5 of Radixin OS=Homo sapiens GN=RDX	0	84.706	35	22	77	10	1	604	71	6.71	12426.8	79.37	22	21	cell organization and biogenesis;regulation of biological process;response to stimulus	cytoplasm;cytoskeleton;membrane	protein binding;RNA binding	Pf00373, Pf00769, Pf09379, Pf09380	5962	ENSG00000137710.14	RDX	11		Regulation of Actin Cytoskeleton	0	100.333	16.6825	130.733	30.6202	78.4667	21.9395	111.333	2.90404	89.5667	30.7408	89.5333	5.97343	1.30299	0.78206	0.804491	0.804192			95.7	86.4
FALSE	High	Master Protein	Q99623	Prohibitin-2 OS=Homo sapiens GN=PHB2 PE=1 SV=2	0	84.439	65	18	82	18	1	299	33.3	9.83	13409.4	78.44	18	18	cell organization and biogenesis;metabolic process;regulation of biological process;response to stimulus;transport	cell surface;cytoplasm;membrane;mitochondrion;nucleus	protein binding	Pf01145	11331	ENSG00000215021.8	PHB2	12			0	121.5	32.9921	93.8	23.7431	99.6667	37.3444	124.5	20.127	86	12.2943	74.5	9.97903	0.772016	0.820302	0.690763	0.598394			77.3	131.7
FALSE	High	Master Protein	P22626	Heterogeneous nuclear ribonucleoproteins A2/B1 OS=Homo sapiens GN=HNRNPA2B1 PE=1 SV=2	0	84.388	46	18	84	15	1	353	37.4	8.95	14316.4	75.81	18	18	metabolic process;regulation of biological process;response to stimulus;transport	cytoplasm;extracellular;membrane;nucleus;spliceosomal complex	DNA binding;protein binding;RNA binding	Pf00076, Pf13893, Pf14259	3181	ENSG00000122566.20	HNRNPA2B1	7		mRNA Processing	2	93.9333	15.1172	116.167	12.0521	62.1667	27.4541	128.933	17.0776	94.6667	42.9594	104.167	37.3693	1.23669	0.661817	0.73423	0.807911			79.7	108.1
FALSE	High	Master Protein	Q16658	Fascin OS=Homo sapiens GN=FSCN1 PE=1 SV=3	0	84.335	40	16	69	16	1	493	54.5	7.24	11378.5	59.21	16	15	cell organization and biogenesis;cell proliferation;cellular component movement;regulation of biological process	cytoplasm;cytoskeleton;cytosol	protein binding;RNA binding	Pf06268	6624	ENSG00000075618.17	FSCN1	7	MicroRNAs in cancer		0	132.9	1.44148	99.3	13.1531	75.9667	20.8744	114.3	23.3247	102.533	10.8395	75	12.6048	0.747178	0.571608	0.897055	0.656168			130.7	134.2
FALSE	High	Master Protein	Q01518	Adenylyl cyclase-associated protein 1 OS=Homo sapiens GN=CAP1 PE=1 SV=5	0	84.013	39	15	59	15	1	475	51.9	8.06	9758.13	53.9	15	15	cell organization and biogenesis;cellular component movement;regulation of biological process;response to stimulus;transport	cytoplasm;cytoskeleton;extracellular;membrane;organelle lumen	protein binding	Pf01213, Pf07986, Pf08603	10487	ENSG00000131236.16	CAP1	1		Angiopoietin Like Protein 8 Regulatory Pathway; Insulin Signaling	0	106	6.3838	115.733	20.3272	89.4667	16.6712	102.667	19.4857	99	5.65657	87.1	18.8625	1.09182	0.844025	0.964286	0.848377			98.2	110.3
FALSE	High	Master Protein	Q9Y277	Voltage-dependent anion-selective channel protein 3 OS=Homo sapiens GN=VDAC3 PE=1 SV=1	0	83.242	33	11	93	10	1	283	30.6	8.66	16452.3	118.83	11	11	cell communication;defense response;regulation of biological process;response to stimulus;transport	membrane;mitochondrion;nucleus	nucleotide binding;transporter activity	Pf01459	7419	ENSG00000078668.13	VDAC3	8	NOD-like receptor signaling pathway; cGMP-PKG signaling pathway; Parkinson's disease; Huntington's disease; Hepatitis B; Viral carcinogenesis; Calcium signaling pathway; HTLV-I infection		0	78.5333	36.4435	100.333	29.4232	99.1667	8.76635	127.6	29.0321	111.367	19.4929	83.0667	14.0156	1.27759	1.26273	0.87278	0.650993			47.4	103.7
FALSE	High	Master Protein	Q15366-3	Isoform 3 of Poly(rC)-binding protein 2 OS=Homo sapiens GN=PCBP2	0	83.023	36	11	128	1	1	362	38.2	6.79	21645.5	168.39	11	11	defense response;metabolic process;regulation of biological process;response to stimulus	cytoplasm;cytosol;membrane;nucleus	DNA binding;protein binding;RNA binding	Pf00013, Pf13014	5094	ENSG00000197111.15	PCBP2	12		mRNA Processing	12	123.7	10.0973	110.333	11.2534	86.4333	18.264	97.8667	17.8304	106.067	6.65083	75.6	9.7265	0.891943	0.698733	1.08379	0.77248			131.6	109.3
FALSE	High	Master Protein	P61604	10 kDa heat shock protein, mitochondrial OS=Homo sapiens GN=HSPE1 PE=1 SV=2	0	82.866	84	16	114	16	1	102	10.9	8.92	22169.8	155.59	16	16	cell differentiation;metabolic process;regulation of biological process;response to stimulus	cytoplasm;membrane;mitochondrion;organelle lumen	metal ion binding;nucleotide binding;protein binding;RNA binding	Pf00166	3336	ENSG00000115541.10	HSPE1	2			0	128.833	27.3875	146.133	21.4067	58.3667	41.0523	95.3333	20.4855	111.933	24.5499	59.4333	52.3071	1.13428	0.45304	1.17413	0.623427			169.3	104.5
FALSE	High	Master Protein	P62191	26S proteasome regulatory subunit 4 OS=Homo sapiens GN=PSMC1 PE=1 SV=1	0	82.675	42	14	82	13	1	440	49.2	6.21	14317.2	87.69	14	14	metabolic process;regulation of biological process;response to stimulus;transport	cytoplasm;cytosol;membrane;nucleus;proteasome	catalytic activity;nucleotide binding;protein binding;RNA binding	Pf00004, Pf00910, Pf01078, Pf05496, Pf05673, Pf05729, Pf07724, Pf07726, Pf07728, Pf13191, Pf13401	5700	ENSG00000100764.13	PSMC1	14	Viral carcinogenesis; Proteasome; Epstein-Barr virus infection	Parkin-Ubiquitin Proteasomal System pathway; Proteasome Degradation	0	119.667	19.6392	88.4333	9.44558	82.2	12.2871	113.9	8.81599	104.167	5.82708	91.6333	19.2776	0.738997	0.686908	0.914545	0.804507			105.7	106.5
FALSE	High	Master Protein	P83731	60S ribosomal protein L24 OS=Homo sapiens GN=RPL24 PE=1 SV=1	0	82.085	53	13	181	13	1	157	17.8	11.25	32315.2	213.91	13	12	cell organization and biogenesis;cellular component movement;metabolic process;regulation of biological process;transport	cytoplasm;cytosol;membrane;ribosome	protein binding;RNA binding;structural molecule activity	Pf01246	6152	ENSG00000114391.12	RPL24	3	Ribosome	Cytoplasmic Ribosomal Proteins	0	50.4667	34.0781	68.9	29.2484	154.567	14.9455	70.6333	33.0611	91.9667	18.1475	163.4	2.49946	1.36526	3.06275	1.30203	2.31336			31	63.6
FALSE	High	Master Protein	P49321	Nuclear autoantigenic sperm protein OS=Homo sapiens GN=NASP PE=1 SV=2	0	82.067	27	17	73	17	1	788	85.2	4.3	12221.7	79.41	17	16	cell organization and biogenesis;cell proliferation;metabolic process;response to stimulus;transport	cytoplasm;nucleus	protein binding	Pf00515, Pf10516, Pf13414, Pf13424	4678	ENSG00000132780.16	NASP	1			0	123.5	25.4962	150.333	33.4969	68.4333	40.5967	95.2333	15.1067	103.6	25.414	58.9	80.8797	1.21727	0.554116	1.08785	0.618481			159.3	111.1
FALSE	High	Master Protein	Q9BQG0-2	Isoform 2 of Myb-binding protein 1A OS=Homo sapiens GN=MYBBP1A	0	81.943	13	17	62	17	1	1332	149.3	9.28	10510	69.32	17	16	cell communication;cell differentiation;metabolic process;regulation of biological process;response to stimulus;transport	cytoplasm;membrane;nucleus	catalytic activity;DNA binding;protein binding;RNA binding	Pf04931, Pf05793, Pf11593, Pf12815	10514	ENSG00000132382.14	MYBBP1A	17		Energy Metabolism	0	99	29.9884	82.3	22.4153	109.9	23.4745	84.1333	29.7557	109.1	16.5918	115.567	22.261	0.831313	1.1101	1.29675	1.37361			78.9	85
FALSE	High	Master Protein	Q9BZE4	Nucleolar GTP-binding protein 1 OS=Homo sapiens GN=GTPBP4 PE=1 SV=3	0	81.662	31	19	75	19	1	634	73.9	9.5	13127.7	84.57	19	18	cell differentiation;regulation of biological process;response to stimulus	cytoplasm;cytosol;Golgi;membrane;nucleus	catalytic activity;nucleotide binding;protein binding;RNA binding	Pf00009, Pf01926, Pf02421, Pf06858, Pf08155, Pf08477	23560	ENSG00000107937.18	GTPBP4	10	Ribosome biogenesis in eukaryotes		0	78.7333	16.9227	84.3	18.7816	86.5333	5.57142	105	11.1372	131.133	19.0524	114.267	4.83262	1.0707	1.09907	1.24889	1.08825			63.6	83.9
FALSE	High	Master Protein	P00505	Aspartate aminotransferase, mitochondrial OS=Homo sapiens GN=GOT2 PE=1 SV=3	0	81.456	33	17	72	17	1	430	47.5	9.01	12959.7	85.97	17	16	metabolic process;response to stimulus;transport	cell surface;membrane;mitochondrion;organelle lumen	catalytic activity;protein binding;RNA binding	Pf00155	2806	ENSG00000125166.12	GOT2	16	Carbon metabolism; Fat digestion and absorption; Arginine and proline metabolism; Biosynthesis of amino acids; Arginine biosynthesis; Metabolic pathways; Alanine, aspartate and glutamate metabolism; Tyrosine metabolism; Cysteine and methionine metabolism; Phenylalanine, tyrosine and tryptophan biosynthesis; 2-Oxocarboxylic acid metabolism; Phenylalanine metabolism	Glycolysis and Gluconeogenesis; Amino Acid metabolism; Alanine and aspartate metabolism	0	124.667	11.3622	110.533	5.67613	79.9	11.2474	117.167	16.4407	88.3667	19.3159	79.4	12.6867	0.886631	0.640909	0.754196	0.677667			119.9	113.5
FALSE	High	Master Protein	Q15393	Splicing factor 3B subunit 3 OS=Homo sapiens GN=SF3B3 PE=1 SV=4	0	81.185	20	18	71	18	1	1217	135.5	5.26	11140.3	74.08	17	18	cell organization and biogenesis;metabolic process;regulation of biological process	nucleus;spliceosomal complex	protein binding;RNA binding	Pf03178, Pf10433	23450	ENSG00000189091.12	SF3B3	16	Spliceosome	mRNA Processing	0	84.2333	4.8737	99.3333	6.71133	100	4.8775	73.4667	6.12573	111.733	3.5545	131.167	7.79142	1.17926	1.18718	1.52087	1.78539			87.7	85.3
FALSE	High	Master Protein	Q92665	28S ribosomal protein S31, mitochondrial OS=Homo sapiens GN=MRPS31 PE=1 SV=3	0	81.023	41	14	52	14	1	395	45.3	9.29	8547.34	51.05	14	14	cell organization and biogenesis;metabolic process	membrane;mitochondrion;ribosome	protein binding;RNA binding;structural molecule activity	Pf15433	10240	ENSG00000102738.7	MRPS31	13			0	99.4667	17.2153	117.3	27.1133	86.1	26.3821	124.7	30.7821	116.467	30.652	55.9333	18.3951	1.17929	0.865617	0.933975	0.448543			80	106.2
FALSE	High	Master Protein	O60506	Heterogeneous nuclear ribonucleoprotein Q OS=Homo sapiens GN=SYNCRIP PE=1 SV=2	0	80.593	25	15	92	9	1	623	69.6	8.59	14678.2	98.23	15	14	cell differentiation;metabolic process;regulation of biological process;response to stimulus	cytoplasm;endoplasmic reticulum;membrane;nucleus;spliceosomal complex	protein binding;RNA binding	Pf00076, Pf13893, Pf14259	10492	ENSG00000135316.17	SYNCRIP	6			0	112.233	11.629	106.233	28.2743	80.2333	18.6411	113.533	23.3864	101.833	15.7243	85.9333	17.9467	0.94654	0.71488	0.896947	0.7569			99.3	112
FALSE	High	Master Protein	P16402	Histone H1.3 OS=Homo sapiens GN=HIST1H1D PE=1 SV=2	0	80.569	35	14	119	1	1	221	22.3	11.02	23734.6	150.48	14	13	cell organization and biogenesis;metabolic process;regulation of biological process	chromosome;nucleus	DNA binding;RNA binding	Pf00538	3007	ENSG00000124575.6	HIST1H1D	6			0	319.9	59.8051	267.05	59.7948	123.55	59.7169	212.15	65.7517	219.3	57.8283	58.05	104.768	0.834792	0.386214	1.0337	0.273627			369.8
FALSE	High	Master Protein	O95347	Structural maintenance of chromosomes protein 2 OS=Homo sapiens GN=SMC2 PE=1 SV=2	0	80.19	21	20	60	20	1	1197	135.6	8.43	9417.25	72.55	18	20	cell division;cell organization and biogenesis;metabolic process;regulation of biological process	chromosome;cytoplasm;cytosol;nucleus	catalytic activity;motor activity;nucleotide binding;protein binding	Pf01576, Pf02463, Pf04111, Pf05262, Pf05622, Pf06470, Pf08317, Pf09726, Pf09731, Pf10174, Pf10186, Pf12128, Pf12718, Pf13166, Pf13175, Pf13304, Pf13476, Pf13555, Pf13863, Pf14362, Pf15619	10592	ENSG00000136824.18	SMC2	9		Retinoblastoma (RB) in Cancer	0	124.2	20.0561	92.1333	15.1567	95.8333	14.4755	98.9333	11.2585	98.9667	16.1488	89.9333	9.28604	0.741814	0.771605	1.00034	0.90903			148.7	98.9
FALSE	High	Master Protein	Q96AG4	Leucine-rich repeat-containing protein 59 OS=Homo sapiens GN=LRRC59 PE=1 SV=1	0	80.033	44	12	95	12	1	307	34.9	9.57	16004.1	117.02	12	12		endoplasmic reticulum;membrane;nucleus	protein binding;RNA binding	Pf12799, Pf13855	55379	ENSG00000108829.9	LRRC59	17			0	115.333	21.68	103.633	5.45369	84.1	20.0201	116.967	18.3434	104.033	7.0172	75.9	8.35044	0.898555	0.729191	0.889427	0.648903			114.8	90.6
FALSE	High	Master Protein	P62333	26S proteasome regulatory subunit 10B OS=Homo sapiens GN=PSMC6 PE=1 SV=1	0	79.93	38	13	71	13	1	389	44.1	7.49	12596.8	90.76	13	13	cell organization and biogenesis;metabolic process;regulation of biological process;response to stimulus;transport	cytoplasm;cytosol;membrane;nucleus;proteasome	catalytic activity;nucleotide binding;protein binding;RNA binding	Pf00004, Pf00910, Pf01078, Pf05496, Pf07724, Pf07726, Pf07728, Pf13191, Pf13207, Pf13401	5706	ENSG00000100519.11	PSMC6	14	Epstein-Barr virus infection; Proteasome	Parkin-Ubiquitin Proteasomal System pathway; Proteasome Degradation	0	127.567	15.1109	83.2	21.4808	83.8333	7.26786	118.867	12.7034	103.5	3.94601	83.1	3.87328	0.652208	0.657173	0.870723	0.699103			136.9	105.4
FALSE	High	Master Protein	Q14980	Nuclear mitotic apparatus protein 1 OS=Homo sapiens GN=NUMA1 PE=1 SV=2	0	79.67	8	16	55	16	1	2115	238.1	5.78	9804.75	54.81	16	15	cell differentiation;cell division;cell organization and biogenesis;metabolic process;regulation of biological process	chromosome;cytoplasm;cytoskeleton;cytosol;membrane;nucleus	protein binding;structural molecule activity	Pf04111, Pf07888, Pf12128	4926	ENSG00000137497.17	NUMA1	11		Ectoderm Differentiation	0	100.533	13.9471	73.3333	22.6546	91.0667	15.0653	87.6667	21.8754	145.7	9.16697	101.633	13.7969	0.729443	0.905836	1.66198	1.15932			112.9	85.3
FALSE	High	Master Protein	P62266	40S ribosomal protein S23 OS=Homo sapiens GN=RPS23 PE=1 SV=3	0	79.508	66	13	104	13	1	143	15.8	10.49	18040	111.91	13	13	cell organization and biogenesis;metabolic process;transport	cytosol;membrane;ribosome	protein binding;RNA binding;structural molecule activity	Pf00164	6228	ENSG00000186468.12	RPS23	5	Ribosome	Cytoplasmic Ribosomal Proteins	0	61.8	55.1037	69.6	20.6462	133	12.9113	91.8667	15.5954	82.5	9.68105	161.267	22.4077	1.12621	2.1521	0.898041	1.75544			25	92.2
FALSE	High	Master Protein	P55786	Puromycin-sensitive aminopeptidase OS=Homo sapiens GN=NPEPPS PE=1 SV=2	0	79.446	17	14	75	14	1	919	103.2	5.72	12322.9	86.37	14	14	metabolic process;response to stimulus	cytoplasm;cytosol;nucleus	catalytic activity;metal ion binding	Pf01433, Pf11838, Pf13485	9520	ENSG00000141279.15	NPEPPS	17			0	110.667	5.2178	108.733	5.49838	81.2	13.5462	109.6	10.8738	102.133	13.1891	87.7	5.2859	0.98253	0.733735	0.931873	0.800182			113.9	104
FALSE	High	Master Protein	P15531-2	Isoform 2 of Nucleoside diphosphate kinase A OS=Homo sapiens GN=NME1	0	79.437	60	10	77	1	1	177	19.6	5.58	13995	87.76	10	10	cellular homeostasis;metabolic process;regulation of biological process;response to stimulus;transport	cytoplasm;cytosol;membrane;nucleus	catalytic activity;DNA binding;metal ion binding;nucleotide binding;protein binding;RNA binding	Pf00334	4830	ENSG00000239672.7	NME1	17			0	219.3	57.735	630.2	57.735	485.1	57.735	377	57.735	306.9	57.735	381.4	57.735	2.87369	2.21204	0.814058	1.01167				219.3
FALSE	High	Master Protein	O00425	Insulin-like growth factor 2 mRNA-binding protein 3 OS=Homo sapiens GN=IGF2BP3 PE=1 SV=2	0	78.937	22	12	83	10	1	579	63.7	8.87	14247.2	85.1	12	12	metabolic process;regulation of biological process;transport	cytoplasm;cytosol;membrane;nucleus	protein binding;RNA binding;translation regulator activity	Pf00013, Pf00076, Pf13014, Pf13893, Pf14259, Pf14611	10643	ENSG00000136231.13	IGF2BP3	7			1	73.2	11.4567	83.8667	30.0445	115.5	10.8723	77.1667	8.37968	109.567	7.91533	140.7	21.8795	1.14572	1.57787	1.41987	1.82333			64.4	74.1
FALSE	High	Master Protein	P61158	Actin-related protein 3 OS=Homo sapiens GN=ACTR3 PE=1 SV=3	0	78.887	42	13	55	13	1	418	47.3	5.88	10129.9	60.05	13	13	cell division;cell organization and biogenesis;cellular component movement;regulation of biological process;response to stimulus	cytoplasm;cytoskeleton;cytosol;membrane	nucleotide binding;protein binding;structural molecule activity	Pf00022	10096	ENSG00000115091.11	ACTR3	2		Association Between Physico-Chemical Features and Toxicity Associated Pathways	0	100.2	19.3435	94.5	3.45985	84.4	9.82984	144.8	33.2978	112.467	31.2953	63.6	30.3508	0.943114	0.842315	0.776703	0.439227			95.5	83.6
FALSE	High	Master Protein	P60900	Proteasome subunit alpha type-6 OS=Homo sapiens GN=PSMA6 PE=1 SV=1	0	78.798	48	15	75	15	1	246	27.4	6.76	13678.7	96.43	15	14	metabolic process;regulation of biological process;response to stimulus;transport	cytoplasm;cytosol;nucleus;proteasome	catalytic activity;nucleotide binding;protein binding;RNA binding	Pf00227, Pf10584	5687	ENSG00000100902.10	PSMA6	14	Proteasome	Proteasome Degradation	0	124.833	21.6161	87.5333	10.5675	82.6	3.92483	127.833	22.255	82.4333	11.8464	94.7667	18.5828	0.701202	0.661682	0.64485	0.74133			97.1	126.4
FALSE	High	Master Protein	Q9Y678	Coatomer subunit gamma-1 OS=Homo sapiens GN=COPG1 PE=1 SV=1	0	78.779	21	14	66	12	1	874	97.7	5.47	9928.24	62.32	14	14	cellular component movement;transport	cytoplasm;cytosol;Golgi;membrane	protein binding;structural molecule activity	Pf01602, Pf08752	22820	ENSG00000181789.14	COPG1	3			2	129.8	20.7871	69.5	35.1212	91.1	9.31684	99.9333	19.5439	112.033	10.6784	97.6667	6.78889	0.535439	0.701849	1.12108	0.977318			148.7	98.9
FALSE	High	Master Protein	Q7L2H7	Eukaryotic translation initiation factor 3 subunit M OS=Homo sapiens GN=EIF3M PE=1 SV=1	0	78.637	31	13	61	13	1	374	42.5	5.63	10311.2	64.95	12	13	metabolic process	cytoplasm;cytosol	protein binding;RNA binding	Pf01399	10480	ENSG00000149100.12	EIF3M	11			0	109.433	8.07476	115.167	16.4796	75.4	35.1106	123.8	16.457	97.1667	11.7398	79.1	20.3336	1.05239	0.689004	0.784868	0.638934			103.6	105.1
FALSE	High	Master Protein	Q99497	Protein/nucleic acid deglycase DJ-1 OS=Homo sapiens GN=PARK7 PE=1 SV=2	0	78.452	67	13	60	13	1	189	19.9	6.79	10150.6	50.96	13	12	cell communication;cell organization and biogenesis;defense response;metabolic process;regulation of biological process;response to stimulus;transport	chromosome;cytoplasm;cytosol;endoplasmic reticulum;membrane;mitochondrion;nucleus;organelle lumen	antioxidant activity;catalytic activity;DNA binding;enzyme regulator activity;metal ion binding;protein binding;RNA binding	Pf01965, Pf13278	11315	ENSG00000116288.12	PARK7	1	Parkinson's disease	Parkinsons Disease Pathway; Synaptic Vesicle Pathway; Androgen receptor signaling pathway	0	123.767	16.021	127.1	9.44368	73.5333	25.2867	106.867	13.9173	94.4667	13.5375	74.2333	11.601	1.02693	0.594129	0.883968	0.694635			137.9	101.1
FALSE	High	Master Protein	P30050	60S ribosomal protein L12 OS=Homo sapiens GN=RPL12 PE=1 SV=1	0	78.353	63	10	88	10	1	165	17.8	9.42	15867.4	106.32	10	9	cell organization and biogenesis;metabolic process;transport	cytosol;membrane;ribosome	protein binding;RNA binding;structural molecule activity	Pf00298, Pf03946	6136	ENSG00000197958.12	RPL12	9	Ribosome	Cytoplasmic Ribosomal Proteins	0	53.6333	8.14075	99.6	4.35215	116.2	2.37715	71.3667	16.9624	105.6	3.96485	153.6	6.5974	1.85705	2.16656	1.47968	2.15227			48.6	55.9
FALSE	High	Master Protein	O14980	Exportin-1 OS=Homo sapiens GN=XPO1 PE=1 SV=1	0	77.8	16	15	77	15	1	1071	123.3	6.06	12160.2	72.8	15	15	cell organization and biogenesis;regulation of biological process;response to stimulus;transport	chromosome;cytoplasm;cytosol;membrane;nucleus	protein binding;RNA binding;transporter activity	Pf03810, Pf08389, Pf08767	7514	ENSG00000082898.16	XPO1	2	Epstein-Barr virus infection; RNA transport; Ribosome biogenesis in eukaryotes; Influenza A; HTLV-I infection	eIF5A regulation in response to inhibition of the nuclear export system	0	89.8	31.7192	104.133	30.1399	89.7333	16.1741	122.6	27.1774	101.8	38.4674	91.9333	11.874	1.15961	0.999258	0.830343	0.749864			65.4	82.9
FALSE	High	Master Protein	O95373	Importin-7 OS=Homo sapiens GN=IPO7 PE=1 SV=1	0	77.529	17	14	70	13	1	1038	119.4	4.82	11435.3	70.15	14	14	defense response;regulation of biological process;response to stimulus;transport	cytoplasm;cytosol;membrane;nucleus	enzyme regulator activity;protein binding;transporter activity	Pf03810, Pf08506	10527	ENSG00000205339.9	IPO7	11			1	107.333	14.72	106.533	17.5425	85.7333	12.4987	111.033	11.4264	100.8	16.3772	88.5333	1.85713	0.992547	0.798758	0.907835	0.797358			96.8	99.7
FALSE	High	Master Protein	O00231-2	Isoform 2 of 26S proteasome non-ATPase regulatory subunit 11 OS=Homo sapiens GN=PSMD11	0	77.24	43	16	65	16	1	423	47.5	6.48	10400.1	66.15	15	16	cell differentiation;cell organization and biogenesis;metabolic process;regulation of biological process;response to stimulus;transport	cytosol;extracellular;membrane;nucleus;organelle lumen;proteasome	protein binding;structural molecule activity	Pf01399	5717		PSMD11	17		Proteasome Degradation; Parkin-Ubiquitin Proteasomal System pathway	0	105.9	22.2507	97.1	18.2844	93.2333	13.2637	124.767	9.60804	102.2	20.4407	76.7667	19.7059	0.916903	0.88039	0.819129	0.615282			84.1	102.7
FALSE	High	Master Protein	Q9Y315	Deoxyribose-phosphate aldolase OS=Homo sapiens GN=DERA PE=1 SV=2	0	77.053	47	12	62	12	1	318	35.2	8.94	11457.7	77.45	12	12	metabolic process;transport	cytoplasm;cytosol;extracellular;nucleus;organelle lumen	catalytic activity	Pf01791	51071	ENSG00000023697.12	DERA	12	Pentose phosphate pathway		0	132.7	44.4374	59.5667	55.0401	68.1667	12.5523	175	10.3433	107.8	14.0871	56.7	22.1977	0.448882	0.51369	0.616	0.324			74.6	131
FALSE	High	Master Protein	P04792	Heat shock protein beta-1 OS=Homo sapiens GN=HSPB1 PE=1 SV=2	0	76.982	54	9	67	9	1	205	22.8	6.4	11290.7	75.34	9	9	cellular component movement;metabolic process;regulation of biological process;response to stimulus	cytoplasm;cytoskeleton;cytosol;membrane;nucleus;proteasome	enzyme regulator activity;protein binding;RNA binding	Pf00011	3315	ENSG00000106211.8	HSPB1	7	VEGF signaling pathway; Epstein-Barr virus infection; MAPK signaling pathway; Amoebiasis	Apoptosis-related network due to altered Notch3 in ovarian cancer; MAPK Signaling Pathway; VEGFA-VEGFR2 Signaling Pathway; p38 MAPK Signaling Pathway; Fas Ligand (FasL) pathway and Stress induction of Heat Shock Proteins (HSP) regulation; ATM Signaling Network in Development and Disease	0	105.067	24.0463	106.6	11.3066	73.4667	21.0361	109.9	13.2499	127.2	19.8246	77.7667	17.1726	1.01459	0.699239	1.15742	0.707613			126.7	77.3
FALSE	High	Master Protein	P62913	60S ribosomal protein L11 OS=Homo sapiens GN=RPL11 PE=1 SV=2	0	76.87	50	10	90	10	1	178	20.2	9.6	16896.8	133.3	9	10	cell organization and biogenesis;metabolic process;regulation of biological process;transport	cytoplasm;cytosol;membrane;nucleus;ribosome	protein binding;RNA binding;structural molecule activity	Pf00281, Pf00673	6135	ENSG00000142676.12	RPL11	1	Ribosome	Cytoplasmic Ribosomal Proteins	0	57.5333	17.2261	76.3333	46.2051	143.9	23.4325	57.1	39.9484	124.4	47.1134	140.767	20.2818	1.32677	2.50116	2.17863	2.46527			53	68.9
FALSE	High	Master Protein	Q5VYK3	Proteasome-associated protein ECM29 homolog OS=Homo sapiens GN=ECM29 PE=1 SV=2	0	76.578	11	18	60	18	1	1845	204.2	7.12	9873.59	65.53	18	18	cell organization and biogenesis;metabolic process	cytoplasm;cytoskeleton;endoplasmic reticulum;endosome;membrane;nucleus;proteasome	protein binding;structural molecule activity	Pf12755, Pf13001	23392		KIAA0368	9			0	112.3	25.9009	92.0333	6.28831	90.2333	8.48243	86.6333	18.9748	123.833	28.2698	94.9	12.7132	0.819531	0.803503	1.4294	1.09542			133.3	79.1
FALSE	High	Master Protein	P52701	DNA mismatch repair protein Msh6 OS=Homo sapiens GN=MSH6 PE=1 SV=2	0	76.549	10	11	68	11	1	1360	152.7	6.9	10924.7	86.9	11	11	cell organization and biogenesis;metabolic process;regulation of biological process;response to stimulus	chromosome;cytosol;Golgi;nucleus	catalytic activity;DNA binding;metal ion binding;nucleotide binding;protein binding	Pf00488, Pf00855, Pf01624, Pf05188, Pf05190, Pf05192	2956	ENSG00000116062.14	MSH6	2	Mismatch repair; Colorectal cancer; Platinum drug resistance; Pathways in cancer	Signaling Pathways in Glioblastoma; Retinoblastoma (RB) in Cancer; Mismatch repair	0	111.967	10.4202	97.5333	24.4848	85.0333	25.5447	98.7333	19.2588	118.367	0.846239	88.3333	19.3052	0.871093	0.759452	1.19885	0.894666			102.8	108
FALSE	High	Master Protein	P45880-1	Isoform 1 of Voltage-dependent anion-selective channel protein 2 OS=Homo sapiens GN=VDAC2	0	76.487	36	13	85	13	1	309	33.4	7.59	15002.4	95.39	13	13	regulation of biological process;transport	membrane;mitochondrion;nucleus	nucleotide binding;protein binding;transporter activity	Pf01459	7417	ENSG00000165637.13	VDAC2	10			0	92.7667	33.9033	95.5667	24.922	99.2	21.5846	116.367	25.2464	108.467	12.5622	87.6	20.407	1.03018	1.06935	0.932111	0.752793			62.4	125.2
FALSE	High	Master Protein	P28074	Proteasome subunit beta type-5 OS=Homo sapiens GN=PSMB5 PE=1 SV=3	0	76.419	40	10	78	10	1	263	28.5	6.92	13525.5	97.39	8	10	metabolic process;regulation of biological process;response to stimulus;transport	cytoplasm;cytosol;nucleus;proteasome	catalytic activity;protein binding	Pf00227	5693	ENSG00000100804.18	PSMB5	14	Proteasome	Proteasome Degradation	0	115.767	7.73786	92.4	12.0965	95.2	6.56744	109.3	19.4279	89.4	9.30565	97.9667	10.4717	0.798157	0.822344	0.817932	0.89631			106	123.6
FALSE	High	Master Protein	P31946	14-3-3 protein beta/alpha OS=Homo sapiens GN=YWHAB PE=1 SV=3	0	76.347	56	11	108	6	1	246	28.1	4.83	18858.6	116.39	11	11	cell organization and biogenesis;metabolic process;regulation of biological process;response to stimulus;transport	cytoplasm;cytosol;membrane;mitochondrion;nucleus	protein binding	Pf00244	7529	ENSG00000166913.12	YWHAB	20	Hippo signaling pathway; Viral carcinogenesis; Oocyte meiosis; Hepatitis B; PI3K-Akt signaling pathway; Cell cycle; Epstein-Barr virus infection	Calcium Regulation in the Cardiac Cell; IL-3 Signaling Pathway; Sudden Infant Death Syndrome (SIDS) Susceptibility Pathways; Myometrial Relaxation and Contraction Pathways; Cell Cycle	2	123.633	11.8006	146.2	23.6168	73.5333	21.7088	111.3	13.4342	97.5	16.3843	47.8	71.9811	1.18253	0.594769	0.876011	0.42947			134.7	107.1
FALSE	High	Master Protein	P35606	Coatomer subunit beta' OS=Homo sapiens GN=COPB2 PE=1 SV=2	0	76.29	20	17	43	17	1	906	102.4	5.27	6991.23	39.86	17	17	transport	cytoplasm;cytosol;Golgi;membrane	protein binding;structural molecule activity	Pf00400, Pf04053	9276	ENSG00000184432.9	COPB2	3			0	150.15	58.2901	126.05	58.4954	113.95	57.8554	123.1	58.6783	172.05	61.4793	114.7	57.83	0.839494	0.758908	1.39764	0.931763				138.1
FALSE	High	Master Protein	O75955	Flotillin-1 OS=Homo sapiens GN=FLOT1 PE=1 SV=3	0	75.962	41	14	64	14	1	427	47.3	7.49	10155.3	72.7	13	14	cell organization and biogenesis;regulation of biological process;response to stimulus;transport	cytoskeleton;endosome;membrane	protein binding	Pf01145	10211	ENSG00000206379.12; ENSG00000230143.9; ENSG00000137312.14; ENSG00000206480.11; ENSG00000232280.9	FLOT1	6; CHR_HSCHR6_MHC_DBB_CTG1; CHR_HSCHR6_MHC_SSTO_CTG1; CHR_HSCHR6_MHC_QBL_CTG1; CHR_HSCHR6_MHC_COX_CTG1	Insulin signaling pathway	Angiopoietin Like Protein 8 Regulatory Pathway; Insulin Signaling	0	85.9	39.2045	108.267	10.3586	74.9667	5.62362	134.8	44.7132	106.767	17.8771	89.3333	20.8132	1.26038	0.87272	0.792038	0.66271			47.7	111.3
FALSE	High	Master Protein	Q12905	Interleukin enhancer-binding factor 2 OS=Homo sapiens GN=ILF2 PE=1 SV=2	0	75.698	44	11	68	11	1	390	43	5.26	12286.3	80.92	11	11	metabolic process;regulation of biological process;response to stimulus;transport	cytoplasm;extracellular;membrane;nucleus;organelle lumen	catalytic activity;DNA binding;nucleotide binding;protein binding;RNA binding	Pf07528	3608	ENSG00000143621.16	ILF2	1		B Cell Receptor Signaling Pathway	0	106.833	5.41393	103.6	8.49256	94.4	15.9367	102.8	9.4127	102.8	12.7951	89.6	15.9481	0.969735	0.883619	1	0.871595			101.7	105.7
FALSE	High	Master Protein	P62277	40S ribosomal protein S13 OS=Homo sapiens GN=RPS13 PE=1 SV=2	0	75.608	56	13	107	13	1	151	17.2	10.54	18339.5	124.54	13	13	cell organization and biogenesis;metabolic process;regulation of biological process;transport	cytosol;membrane;nucleus;ribosome	protein binding;RNA binding;structural molecule activity	Pf00312, Pf08069	6207	ENSG00000110700.6	RPS13	11	Ribosome	Cytoplasmic Ribosomal Proteins	0	67.0667	23.6765	70.1667	4.98677	128.5	5.66171	100.1	13.2788	83.8667	16.0759	150.3	4.77144	1.04622	1.916	0.837829	1.5015			49.5	80.4
FALSE	High	Master Protein	P11388-4	Isoform 4 of DNA topoisomerase 2-alpha OS=Homo sapiens GN=TOP2A	0	75.455	14	23	90	16	1	1612	182.6	8.63	12605.1	83.79	22	23	cell differentiation;cell division;cell organization and biogenesis;metabolic process;regulation of biological process;response to stimulus	chromosome;nucleus	catalytic activity;DNA binding;metal ion binding;nucleotide binding;protein binding;RNA binding	Pf00204, Pf00521, Pf01751, Pf02518, Pf08070	7153		TOP2A	17		Gastric cancer network 2; Retinoblastoma (RB) in Cancer; Gastric Cancer Network 1	7	106.2	10.296	84.8667	4.05851	89.4667	14.2573	111.033	16.5232	106.667	16.8085	101.733	10.1746	0.799121	0.842436	0.960672	0.916241			115.6	94.2
FALSE	High	Master Protein	P11387	DNA topoisomerase 1 OS=Homo sapiens GN=TOP1 PE=1 SV=2	0	75.245	22	19	80	19	1	765	90.7	9.31	12020.4	96.89	18	19	cell death;cell division;cell organization and biogenesis;metabolic process;regulation of biological process;response to stimulus	chromosome;cytoplasm;nucleus	catalytic activity;DNA binding;nucleotide binding;protein binding;RNA binding	Pf01028, Pf02919, Pf14370	7150	ENSG00000198900.5	TOP1	20			0	109.633	11.4123	91.8333	12.8301	88.9333	14.1314	106.7	23.3195	113.8	12.7562	89.1	3.92817	0.837641	0.811189	1.06654	0.835052			116.3	95.2
FALSE	High	Master Protein	P06737	Glycogen phosphorylase, liver form OS=Homo sapiens GN=PYGL PE=1 SV=4	0	75.187	23	18	67	16	1	847	97.1	7.17	9475.04	49.79	18	18	cell death;metabolic process;transport	cytoplasm;cytosol;extracellular;organelle lumen	catalytic activity;nucleotide binding;protein binding	Pf00343	5836	ENSG00000100504.16	PYGL	14	Insulin signaling pathway; Metabolic pathways; Glucagon signaling pathway; Insulin resistance; Starch and sucrose metabolism	TNF alpha Signaling Pathway; Glycogen Metabolism	2	110.1	11.4012	107.767	7.00101	82.4333	7.3253	106.733	3.38372	104.9	13.4448	88.0667	3.90939	0.978807	0.748713	0.982823	0.825109			119.3	95.8
FALSE	High	Master Protein	O94905	Erlin-2 OS=Homo sapiens GN=ERLIN2 PE=1 SV=1	0	75.163	42	14	76	10	1	339	37.8	5.62	12585.7	83.72	14	13	metabolic process;regulation of biological process;response to stimulus;transport	cytosol;endoplasmic reticulum;membrane	catalytic activity;protein binding	Pf01145	11160	ENSG00000147475.14	ERLIN2	8			4	128.367	39.8171	92.3667	31.4973	92.5667	42.5738	139.6	8.2266	85.4	19.6327	61.6333	21.5922	0.719553	0.721111	0.611748	0.4415			72	141.4
FALSE	High	Master Protein	P30048	Thioredoxin-dependent peroxide reductase, mitochondrial OS=Homo sapiens GN=PRDX3 PE=1 SV=3	0	75.106	39	8	111	8	1	256	27.7	7.78	20062.4	138.3	8	8	cell death;cell differentiation;cell organization and biogenesis;cellular homeostasis;metabolic process;regulation of biological process;response to stimulus	cytoplasm;cytosol;endosome;mitochondrion;organelle lumen	antioxidant activity;catalytic activity;enzyme regulator activity;protein binding	Pf00578, Pf08534, Pf10417, Pf13905	10935	ENSG00000165672.6	PRDX3	10		Selenium Micronutrient Network	0	98.3667	25.8228	99.4333	13.3839	68.5667	1.85246	101.2	3.9116	107.633	14.0909	124.833	20.8401	1.01084	0.697052	1.06357	1.23353			98.1	73.1
FALSE	High	Master Protein	P17066	Heat shock 70 kDa protein 6 OS=Homo sapiens GN=HSPA6 PE=1 SV=2	0	75.092	20	11	103	1	1	643	71	6.14	18525.5	128.45	11	10	cell organization and biogenesis;metabolic process;response to stimulus;transport	cytoplasm;cytosol;extracellular;organelle lumen	catalytic activity;nucleotide binding;protein binding	Pf00012, Pf06723	3310	ENSG00000173110.7	HSPA6	1	Measles; Epstein-Barr virus infection; Estrogen signaling pathway; Protein processing in endoplasmic reticulum; Endocytosis; Spliceosome; Legionellosis; Longevity regulating pathway - multiple species; Influenza A; Toxoplasmosis; MAPK signaling pathway; Antigen processing and presentation	Parkin-Ubiquitin Proteasomal System pathway	0	201.1	57.735	434.7	57.735	393.5	57.735	282.6	57.735	706.3	57.735	381.8	57.735	2.16161	1.95674	2.49929	1.35103				201.1
FALSE	High	Master Protein	O14979	Heterogeneous nuclear ribonucleoprotein D-like OS=Homo sapiens GN=HNRNPDL PE=1 SV=3	0	74.848	23	11	81	9	1	420	46.4	9.57	15102.9	101.54	11	11	metabolic process;regulation of biological process;response to stimulus	cytoplasm;cytosol;nucleus;spliceosomal complex	DNA binding;protein binding;RNA binding	Pf00076, Pf08777, Pf13893, Pf14259	9987	ENSG00000152795.17	HNRNPDL; HNRPDL	4			0	118.3	36.5256	139.8	21.1717	66.9667	46.3365	98.1667	13.8481	104.633	38.1326	72.1333	37.9217	1.18174	0.566075	1.06587	0.734805			167.6	100.3
FALSE	High	Master Protein	P12235	ADP/ATP translocase 1 OS=Homo sapiens GN=SLC25A4 PE=1 SV=4	0	74.752	45	14	73	2	1	298	33	9.76	12515.2	77.05	14	13	cell organization and biogenesis;metabolic process;regulation of biological process;transport	membrane;mitochondrion;nucleus	protein binding;transporter activity	Pf00153	291	ENSG00000151729.10	SLC25A4	4	HTLV-I infection; Parkinson's disease; cGMP-PKG signaling pathway; Calcium signaling pathway; Huntington's disease	Sudden Infant Death Syndrome (SIDS) Susceptibility Pathways; Synaptic Vesicle Pathway; Electron Transport Chain	0	137.7	77.9906	145.45	73.7524	188.6	59.6001	321.45	59.4263	201.3	64.3268	205.5	57.965	1.05628	1.36964	0.626225	0.639291			65.5
FALSE	High	Master Protein	P60228	Eukaryotic translation initiation factor 3 subunit E OS=Homo sapiens GN=EIF3E PE=1 SV=1	0	74.689	37	14	56	14	1	445	52.2	6.04	9716.24	56.67	14	12	metabolic process;regulation of biological process	chromosome;cytoplasm;cytosol;membrane;nucleus	protein binding;RNA binding	Pf01399, Pf09440	3646	ENSG00000104408.9	EIF3E	8	RNA transport; Hepatitis C	Translation Factors	0	104.067	16.9091	117.233	22.8604	93.4333	17.5756	118.833	15.5535	87.4	5.35195	79.0333	15.9498	1.12652	0.897822	0.735484	0.665077			83.9	112
FALSE	High	Master Protein	Q9NX58	Cell growth-regulating nucleolar protein OS=Homo sapiens GN=LYAR PE=1 SV=2	0	74.606	34	13	46	13	1	379	43.6	9.54	8891.21	43.99	13	11		nucleus	metal ion binding;protein binding;RNA binding	Pf08790	55646		LYAR	4			0	135.767	18.6396	60.1667	36.9119	66.1	23.0173	156.667	32.8976	116.367	16.6356	64.9333	32.5428	0.443162	0.486865	0.742766	0.414468			158.5	140.3
FALSE	High	Master Protein	P04844	Dolichyl-diphosphooligosaccharide--protein glycosyltransferase subunit 2 OS=Homo sapiens GN=RPN2 PE=1 SV=3	0	74.422	24	10	59	10	1	631	69.2	5.69	10404.7	72.82	10	10	metabolic process;response to stimulus	endoplasmic reticulum;membrane	catalytic activity;protein binding	Pf05817	6185	ENSG00000118705.16	RPN2	20	Metabolic pathways; N-Glycan biosynthesis; Protein processing in endoplasmic reticulum	Proteasome Degradation	0	95.5	33.9351	114.833	48.1139	97.9333	5.77743	107.533	5.14952	92.1	23.8038	92.1	10.2736	1.20244	1.02548	0.856479	0.856479			60.3	102.1
FALSE	High	Master Protein	P30040	Endoplasmic reticulum resident protein 29 OS=Homo sapiens GN=ERP29 PE=1 SV=4	0	74.293	42	12	61	12	1	261	29	7.31	11177.5	84.33	12	12	metabolic process;regulation of biological process;transport	cell surface;endoplasmic reticulum;membrane;organelle lumen	catalytic activity;protein binding	Pf07749, Pf07912	10961	ENSG00000089248.6	ERP29	12	Protein processing in endoplasmic reticulum		0	140.433	32.3986	117.333	9.67633	61.9667	24.5507	105.667	38.1905	112.6	14.3683	62.0333	33.6176	0.835509	0.441253	1.06562	0.587066			191.8	105.2
FALSE	High	Master Protein	Q15365	Poly(rC)-binding protein 1 OS=Homo sapiens GN=PCBP1 PE=1 SV=2	0	74.211	29	10	86	5	1	356	37.5	7.09	16482.7	121.92	10	10	metabolic process;regulation of biological process	cytoplasm;cytosol;membrane;nucleus	DNA binding;protein binding;RNA binding	Pf00013, Pf13014	5093	ENSG00000169564.6	PCBP1	2	Spliceosome		0	123.633	13.5128	104.5	2.6433	86.2	20.6994	101.333	21.0013	110.233	10.6159	74.0333	21.2425	0.845241	0.697223	1.08783	0.730592			123.1	107.2
FALSE	High	Master Protein	P42166	Lamina-associated polypeptide 2, isoform alpha OS=Homo sapiens GN=TMPO PE=1 SV=2	0	74.196	27	13	44	9	1	694	75.4	7.66	7642.41	50.01	12	12	regulation of biological process	chromosome;nucleus	DNA binding;protein binding	Pf03020, Pf08198, Pf11560	7112	ENSG00000120802.13	TMPO	12			4	105.933	9.51808	93.1667	24.1663	89.8667	25.2462	89.1333	12.1666	118.2	11.9433	103.767	30.7051	0.879484	0.848332	1.3261	1.16417			101.3	99
FALSE	High	Master Protein	Q92973	Transportin-1 OS=Homo sapiens GN=TNPO1 PE=1 SV=2	0	74.168	15	12	89	9	1	898	102.3	4.98	14524.7	101.33	12	12	cellular component movement;regulation of biological process;transport	cytoplasm;cytosol;membrane;nucleus	protein binding;RNA binding;transporter activity	Pf03810, Pf13513, Pf13646	3842	ENSG00000083312.17	TNPO1	5			3	122.4	17.2687	101.933	5.13741	83.1	7.11211	118.1	11.364	95.5	25.8804	79	11.8724	0.832789	0.678922	0.808637	0.668925			146.1	105.5
FALSE	High	Master Protein	Q92945	Far upstream element-binding protein 2 OS=Homo sapiens GN=KHSRP PE=1 SV=4	0	74.16	34	20	67	17	1	711	73.1	7.3	10540.9	54.21	20	18	metabolic process;regulation of biological process;response to stimulus;transport	cytoplasm;cytosol;membrane;nucleus	DNA binding;protein binding;RNA binding	Pf00013, Pf07650, Pf09005, Pf13014	8570	ENSG00000088247.17	KHSRP	19		Preimplantation Embryo	3	129.133	19.347	122.033	20.9517	71.4667	41.7197	98.0333	7.30348	107.667	12.6262	71.7667	33.3354	0.945018	0.553433	1.09827	0.732064			148	100.8
FALSE	High	Master Protein	Q14566	DNA replication licensing factor MCM6 OS=Homo sapiens GN=MCM6 PE=1 SV=1	0	74.028	21	13	47	13	1	821	92.8	5.41	8143.9	52.41	13	13	metabolic process	nucleus	catalytic activity;DNA binding;nucleotide binding;protein binding	Pf00493, Pf01078, Pf07728, Pf14551	4175	ENSG00000076003.4	MCM6	2	Cell cycle; DNA replication	DNA Replication; G1 to S cell cycle control; Retinoblastoma (RB) in Cancer; Cell Cycle	0	116.867	12.5409	96.8667	15.2761	83.4333	10.9695	101.533	13.6976	115.333	10.8936	85.9667	10.9173	0.828865	0.713919	1.13592	0.846684			124.1	100
FALSE	High	Master Protein	Q13263	Transcription intermediary factor 1-beta OS=Homo sapiens GN=TRIM28 PE=1 SV=5	0	73.961	19	14	89	14	1	835	88.5	5.77	14881.5	101.88	14	13	cell organization and biogenesis;defense response;metabolic process;regulation of biological process;response to stimulus	chromosome;nucleus	catalytic activity;DNA binding;metal ion binding;protein binding;RNA binding	Pf00628, Pf00643	10155	ENSG00000130726.11	TRIM28	19		Corticotropin-releasing hormone signaling pathway; Mesodermal Commitment Pathway; ATM Signaling Network in Development and Disease	0	88.4667	19.4622	86.8333	8.31756	83.4	25.1339	96.9333	17.1724	107.633	14.6802	136.7	23.5088	0.981537	0.942728	1.11039	1.41025			85.7	106.9
FALSE	High	Master Protein	O14818	Proteasome subunit alpha type-7 OS=Homo sapiens GN=PSMA7 PE=1 SV=1	0	73.947	57	14	63	14	1	248	27.9	8.46	11005	72.97	13	14	metabolic process;regulation of biological process;response to stimulus;transport	cytoplasm;cytosol;nucleus;proteasome	catalytic activity;nucleotide binding;protein binding	Pf00227, Pf10584	5688	ENSG00000101182.14	PSMA7	20	Proteasome	Proteasome Degradation	0	109.333	8.31378	96.2333	3.33875	83.1	1.91029	120.733	6.00159	93.8	8.27515	96.8	5.21362	0.880183	0.760061	0.776919	0.801767			101.3	107.5
FALSE	High	Master Protein	Q9BZE1	39S ribosomal protein L37, mitochondrial OS=Homo sapiens GN=MRPL37 PE=1 SV=2	0	73.866	45	19	76	19	1	423	48.1	8.59	10970.9	66.07	18	18	cell organization and biogenesis;metabolic process	membrane;mitochondrion;ribosome	RNA binding;structural molecule activity	Pf07147	51253	ENSG00000116221.15	MRPL37	1			0	116.6	41.1236	89.7	28.525	76.1667	23.7504	154.533	39.827	93.5667	14.9574	69.4333	8.07086	0.769297	0.65323	0.605479	0.44931			63.1	131
FALSE	High	Master Protein	O94906	Pre-mRNA-processing factor 6 OS=Homo sapiens GN=PRPF6 PE=1 SV=1	0	73.75	11	13	65	13	1	941	106.9	8.25	11645.6	87.91	13	12	cell organization and biogenesis;metabolic process;regulation of biological process	membrane;nucleus;spliceosomal complex	protein binding;RNA binding	Pf06424, Pf13414, Pf14559	24148	ENSG00000101161.7	PRPF6	20	Spliceosome	mRNA Processing	0	116.4	12.4018	88.2333	1.41708	86.8	10.4076	112.533	11.5372	110.867	17.7398	85.1667	8.64935	0.758018	0.745704	0.98519	0.756813			119.7	100.6
FALSE	High	Master Protein	P10768	S-formylglutathione hydrolase OS=Homo sapiens GN=ESD PE=1 SV=2	0	73.744	35	11	62	11	1	282	31.4	7.02	10958.9	87.94	9	11	metabolic process	cytoplasm;organelle lumen	catalytic activity;protein binding	Pf00326, Pf00756, Pf05448, Pf12695, Pf12697	2098	ENSG00000139684.13	ESD	13	Carbon metabolism	Phase I biotransformations, non P450	0	133.4	7.33829	101.867	7.63207	84.2	15.3184	103.933	18.9377	97.3667	11.0932	79.2	18.1414	0.763618	0.631184	0.936818	0.762027			144	124.7
FALSE	High	Master Protein	P51858	Hepatoma-derived growth factor OS=Homo sapiens GN=HDGF PE=1 SV=1	0	73.514	48	13	60	12	1	240	26.8	4.73	10863	65.09	13	12	cell proliferation;metabolic process;regulation of biological process;response to stimulus	cytoplasm;extracellular;nucleus	DNA binding;nucleotide binding;protein binding;RNA binding	Pf00855	3068	ENSG00000143321.18	HDGF	1			1	117.5	42.1759	153.333	35.1326	68.0333	51.0978	82.8667	6.52803	105.4	24.1613	72.9333	27.3459	1.30496	0.579007	1.27192	0.880129			174.6	92.2
FALSE	High	Master Protein	O15027-5	Isoform 5 of Protein transport protein Sec16A OS=Homo sapiens GN=SEC16A	0	73.498	12	18	69	18	1	2201	235.6	5.67	9560.36	69.58	18	18	cell organization and biogenesis;transport	cytosol;endoplasmic reticulum;Golgi;membrane	protein binding	Pf12931, Pf12932	9919		SEC16A	9			0	54.0667	36.7112	96.2333	23.2304	74.6	44.7065	53.0333	18.2099	224.2	23.666	98	6.227	1.7799	1.37978	4.22753	1.84789			32.8	57.3
FALSE	High	Master Protein	P46778	60S ribosomal protein L21 OS=Homo sapiens GN=RPL21 PE=1 SV=2	0	73.4	44	11	120	11	1	160	18.6	10.49	17710.9	104.63	11	11	cell organization and biogenesis;metabolic process;transport	cytosol;membrane;ribosome	protein binding;RNA binding;structural molecule activity	Pf01157	6144	ENSG00000122026.10	RPL21	13	Ribosome	Cytoplasmic Ribosomal Proteins	0	49.1	37.2564	91.9333	38.8593	136.667	17.6591	60.5333	31.0978	105.933	29.1405	155.833	15.463	1.87237	2.78344	1.75	2.57434			28.2	56.9
FALSE	High	Master Protein	Q01105-2	Isoform 2 of Protein SET OS=Homo sapiens GN=SET	0	73.241	47	11	52	2	1	277	32.1	4.22	9173.92	59.92	11	11	cell organization and biogenesis;metabolic process;regulation of biological process;transport	cytoplasm;cytosol;endoplasmic reticulum;nucleus	DNA binding;enzyme regulator activity;protein binding	Pf00956	6418	ENSG00000119335.16	SET	9		Histone Modifications	9	125.567	37.4843	140.1	20.4	71.2333	49.3872	86.2667	12.9656	111.667	21.5293	65.2333	42.5545	1.11574	0.567295	1.29444	0.756182			178.7	89.1
FALSE	High	Master Protein	Q9Y281	Cofilin-2 OS=Homo sapiens GN=CFL2 PE=1 SV=1	0	72.599	56	11	107	3	1	166	18.7	7.88	18194.7	102.41	11	11	cell organization and biogenesis;cellular homeostasis;regulation of biological process	cytoplasm;cytoskeleton;nucleus	protein binding	Pf00241	1073	ENSG00000165410.14	CFL2	14	Regulation of actin cytoskeleton; Axon guidance; Pertussis; Fc gamma R-mediated phagocytosis	Regulation of Microtubule Cytoskeleton; G13 Signaling Pathway; Leptin signaling pathway; Regulation of Actin Cytoskeleton	0	112.667	16.3078	103.833	19.0072	85.1667	30.8148	98.8667	22.0576	110.167	31.0499	89.2667	12.6286	0.921598	0.755917	1.1143	0.9029			124.5	91.5
FALSE	High	Master Protein	Q9UNM6-2	Isoform 2 of 26S proteasome non-ATPase regulatory subunit 13 OS=Homo sapiens GN=PSMD13	0	72.466	45	16	79	16	1	378	42.9	6.54	13254.3	75.31	16	16	cell organization and biogenesis;metabolic process;regulation of biological process;response to stimulus;transport	cytosol;extracellular;membrane;nucleus;organelle lumen;proteasome	protein binding;structural molecule activity	Pf01399	5719	ENSG00000185627.17	PSMD13	11		Proteasome Degradation; Parkin-Ubiquitin Proteasomal System pathway	0	105.667	34.7778	108.033	18.5383	80.3667	2.13473	150.433	22.3245	75.8	28.5988	79.7	14.5367	1.0224	0.760568	0.503878	0.529803			64.2	118.6
FALSE	High	Master Protein	Q02543	60S ribosomal protein L18a OS=Homo sapiens GN=RPL18A PE=1 SV=2	0	71.874	48	12	88	12	1	176	20.7	10.71	15156.9	100.01	12	12	cell organization and biogenesis;metabolic process;response to stimulus;transport	cytosol;membrane;ribosome	protein binding;RNA binding;structural molecule activity	Pf01775	6142	ENSG00000105640.12	RPL18A	19	Ribosome	Cytoplasmic Ribosomal Proteins	0	53.2333	15.2812	85.5667	13.3149	132.933	8.32879	74.9	18.2222	104.267	21.6051	149.133	7.92327	1.60739	2.49718	1.39208	1.9911			44.1	59.7
FALSE	High	Master Protein	P40925-3	Isoform 3 of Malate dehydrogenase, cytoplasmic OS=Homo sapiens GN=MDH1	0	71.594	41	14	69	14	1	352	38.6	7.71	10458.9	65.82	14	14	metabolic process	cytosol;mitochondrion	catalytic activity;nucleotide binding;protein binding	Pf00056, Pf02866	4190	ENSG00000014641.17	MDH1	2		Sterol Regulatory Element-Binding Proteins (SREBP) signalling; Glycolysis and Gluconeogenesis; TCA Cycle and Deficiency of Pyruvate Dehydrogenase complex (PDHc); Amino Acid metabolism	0	119.733	17.5581	106.6	1.54428	84.2667	5.57795	113.433	4.81273	97.8333	24.8481	78.1667	13.3156	0.890312	0.703786	0.862474	0.689098			141.3	99.3
FALSE	High	Master Protein	Q9Y262	Eukaryotic translation initiation factor 3 subunit L OS=Homo sapiens GN=EIF3L PE=1 SV=1	0	71.335	33	17	51	17	1	564	66.7	6.34	8876.93	45.8	16	16	metabolic process	cytoplasm;cytosol;membrane	protein binding;RNA binding	Pf10255	51386	ENSG00000100129.17	EIF3L	22			0	106.567	37.1206	110.433	34.479	92.5333	2.04286	119.2	9.17618	84.6333	1.26341	86.6667	18.3575	1.03628	0.868314	0.710011	0.727069			64.3	112.7
FALSE	High	Master Protein	Q9Y266	Nuclear migration protein nudC OS=Homo sapiens GN=NUDC PE=1 SV=1	0	71.322	52	15	46	15	1	331	38.2	5.38	7053.51	33.25	15	14	cell division;cell organization and biogenesis;cell proliferation;development;metabolic process	cytoplasm;cytoskeleton;cytosol;nucleus	protein binding	Pf04969, Pf14050	10726	ENSG00000090273.13	NUDC	1			0	128.1	57.9857	127.15	58.2317	118.65	58.0939	160.7	57.7834	156.2	59.1938	109.15	58.0183	0.992584	0.92623	0.971998	0.679216				121.2
FALSE	High	Master Protein	Q9UMS4	Pre-mRNA-processing factor 19 OS=Homo sapiens GN=PRPF19 PE=1 SV=1	0	70.808	36	15	52	15	1	504	55.1	6.61	7902.04	49.96	15	15	cell organization and biogenesis;cell proliferation;metabolic process;regulation of biological process;response to stimulus	cytoplasm;cytoskeleton;membrane;nucleus;spliceosomal complex	catalytic activity;metal ion binding;protein binding	Pf00400, Pf04564, Pf08606, Pf11789	27339	ENSG00000110107.8	PRPF19	11	Ubiquitin mediated proteolysis; Spliceosome		0	85.4333	23.6952	130.433	14.7348	93.6333	22.1058	88.4	25.6039	90.7	11.8557	111.367	7.06597	1.52673	1.09598	1.02602	1.2598			66	106.4
FALSE	High	Master Protein	O43390	Heterogeneous nuclear ribonucleoprotein R OS=Homo sapiens GN=HNRNPR PE=1 SV=1	0	70.555	32	17	80	11	1	633	70.9	8.13	12412.9	70.46	17	16	metabolic process;regulation of biological process	cytoplasm;endoplasmic reticulum;nucleus;spliceosomal complex	protein binding;RNA binding	Pf00076, Pf13893, Pf14259	10236	ENSG00000282958.1; ENSG00000125944.18	HNRNPR	1; CHR_HSCHR1_4_CTG3		mRNA Processing	7	115.233	17.4445	97.2	15.9392	87.1	14.4675	104.7	24.2237	106.267	15.1106	89.5	26.8708	0.843506	0.755858	1.01496	0.854823			138.4	102.4
FALSE	High	Master Protein	O75533	Splicing factor 3B subunit 1 OS=Homo sapiens GN=SF3B1 PE=1 SV=3	0	70.489	18	16	43	16	1	1304	145.7	7.09	6949.59	50.12	15	15	cell organization and biogenesis;metabolic process;regulation of biological process;response to stimulus	nucleus;spliceosomal complex	DNA binding;protein binding;receptor activity;RNA binding;signal transducer activity	Pf02161, Pf08920, Pf12815, Pf13513	23451	ENSG00000115524.15	SF3B1	2	Spliceosome	mRNA Processing	0	68.4667	6.88224	109.1	11.2886	96.5	19.2389	82.9333	31.6497	108.167	14.769	134.767	13.8049	1.59348	1.40944	1.30426	1.625			65.5	73.9
FALSE	High	Master Protein	Q2NL82	Pre-rRNA-processing protein TSR1 homolog OS=Homo sapiens GN=TSR1 PE=1 SV=1	0	69.923	21	14	43	14	1	804	91.8	7.42	8071.41	50.26	14	11	cell organization and biogenesis;metabolic process	cytosol;nucleus	catalytic activity;nucleotide binding;RNA binding	Pf04950, Pf08142	55720	ENSG00000167721.10	TSR1	17			0	175.4	27.0435	71.4	46.3458	78.1667	34.2858	114.6	22.4218	96.8667	7.99275	63.6	14.889	0.40707	0.445648	0.845259	0.554974			123.4	186.5
FALSE	High	Master Protein	P49915	GMP synthase [glutamine-hydrolyzing] OS=Homo sapiens GN=GMPS PE=1 SV=1	0	69.812	28	13	59	13	1	693	76.7	6.87	9575.04	65.21	12	13	metabolic process	cytoplasm;cytosol	catalytic activity;nucleotide binding	Pf00117, Pf00733, Pf00958, Pf01171, Pf02540, Pf03054, Pf06508, Pf07722	8833	ENSG00000163655.15	GMPS	3	Metabolic pathways; Purine metabolism; Drug metabolism - other enzymes		0	114	16.3894	99.3333	5.61266	88.6	12.0783	104.467	7.31608	110.333	6.22833	83.2	10.1539	0.871345	0.777193	1.05616	0.796426			123.2	92.5
FALSE	High	Master Protein	P50914	60S ribosomal protein L14 OS=Homo sapiens GN=RPL14 PE=1 SV=4	0	69.703	38	9	108	9	1	215	23.4	10.93	19541.1	120.17	9	8	cell organization and biogenesis;metabolic process;transport	cytosol;membrane;ribosome	protein binding;RNA binding;structural molecule activity	Pf01929	9045	ENSG00000188846.13	RPL14	3	Ribosome	Cytoplasmic Ribosomal Proteins	0	52.6333	23.9952	73.2333	37.8384	148.2	14.5425	62.2333	47.1667	120.667	33.2113	143	6.25434	1.39139	2.81571	1.93894	2.2978			38.4	57
FALSE	High	Master Protein	Q9Y3B7	39S ribosomal protein L11, mitochondrial OS=Homo sapiens GN=MRPL11 PE=1 SV=1	0	69.431	60	10	61	10	1	192	20.7	9.91	10865.9	69.86	10	10	cell organization and biogenesis;metabolic process	membrane;mitochondrion;ribosome	protein binding;RNA binding;structural molecule activity	Pf00298, Pf03946	65003	ENSG00000174547.13	MRPL11	11	Ribosome		0	135.267	34.8219	95.7333	22.0642	75	11.8006	154.1	22.4811	91.5333	6.97176	48.4	12.4602	0.707738	0.55446	0.593987	0.314082			89.5	132.7
FALSE	High	Master Protein	P25205-2	Isoform 2 of DNA replication licensing factor MCM3 OS=Homo sapiens GN=MCM3	0	68.971	20	12	57	12	1	853	95.8	5.77	10395.3	68.27	12	12	metabolic process	membrane;nucleus	catalytic activity;DNA binding;nucleotide binding;protein binding	Pf00493, Pf01078, Pf07728, Pf14551	4172	ENSG00000112118.18	MCM3	6		DNA Replication; G1 to S cell cycle control; Retinoblastoma (RB) in Cancer; Cell Cycle	0	108.233	11.9671	103.3	7.83287	87.1	7.91527	96.3	11.5783	114	11.4167	91	6.94224	0.954419	0.804743	1.1838	0.944964			96.8	105.6
FALSE	High	Master Protein	Q15691	Microtubule-associated protein RP/EB family member 1 OS=Homo sapiens GN=MAPRE1 PE=1 SV=3	0	68.788	53	15	57	13	1	268	30	5.14	9434.09	66.38	15	13	cell division;cell organization and biogenesis;cell proliferation;regulation of biological process	cytoplasm;cytoskeleton;cytosol;Golgi	protein binding;RNA binding	Pf00307, Pf03271	22919	ENSG00000101367.8	MAPRE1	20		Regulation of Microtubule Cytoskeleton	2	133.767	45.8322	113.3	6.77315	77.6333	28.0595	94.8667	33.2388	107.067	6.8382	73.3333	14.8757	0.846997	0.580364	1.1286	0.773015			201.8	82.8
FALSE	High	Master Protein	Q9BXJ9	N-alpha-acetyltransferase 15, NatA auxiliary subunit OS=Homo sapiens GN=NAA15 PE=1 SV=1	0	68.75	22	20	52	20	1	866	101.2	7.42	8498.94	47.5	20	18	cell differentiation;development;metabolic process;regulation of biological process	cytoplasm;cytosol;membrane;nucleus	catalytic activity;protein binding;RNA binding	Pf12569, Pf13414	80155	ENSG00000164134.12	NAA15	4			0	119.933	15.0671	82.5333	22.1123	92.9667	3.03162	111.667	16.8839	108.4	11.4788	84.5667	29.5659	0.68816	0.775153	0.970746	0.757313			114.1	105.5
FALSE	High	Master Protein	P49419-2	Isoform 2 of Alpha-aminoadipic semialdehyde dehydrogenase OS=Homo sapiens GN=ALDH7A1	0	68.687	22	9	50	9	1	511	55.3	6.86	9683.4	77.74	9	9	metabolic process	cytosol;mitochondrion;nucleus;organelle lumen	catalytic activity;protein binding	Pf00171	501		ALDH7A1	5			0	132.8	5.01248	107.567	6.62887	84.7	15.243	104.5	7.35536	96.3	13.8531	74.1333	13.0757	0.80999	0.637801	0.921531	0.70941			140.2	127.3
FALSE	High	Master Protein	Q14254	Flotillin-2 OS=Homo sapiens GN=FLOT2 PE=1 SV=2	0	68.602	29	12	51	12	1	428	47	5.25	8524.72	50.05	11	12	cell organization and biogenesis;regulation of biological process	cytoskeleton;endosome;membrane	protein binding	Pf01145	2319	ENSG00000132589.15	FLOT2	17	Insulin signaling pathway	Angiopoietin Like Protein 8 Regulatory Pathway; Insulin Signaling	0	83.0333	27.5291	110.033	11.1907	85.9	19.1419	110.267	2.94891	106.567	6.4348	104.233	21.6934	1.32517	1.03452	0.966445	0.945284			57.4	101.3
FALSE	High	Master Protein	P61586	Transforming protein RhoA OS=Homo sapiens GN=RHOA PE=1 SV=1	0	68.539	47	10	64	3	1	193	21.8	6.1	12175.9	107.01	10	10	cell differentiation;cell division;cell organization and biogenesis;cellular component movement;metabolic process;regulation of biological process;response to stimulus;transport	cytoplasm;cytoskeleton;cytosol;endosome;membrane	catalytic activity;nucleotide binding;protein binding	Pf00025, Pf00071, Pf08477	387	ENSG00000067560.10	RHOA	3	TGF-beta signaling pathway; Oxytocin signaling pathway; Adherens junction; cGMP-PKG signaling pathway; Focal adhesion; cAMP signaling pathway; Pathogenic Escherichia coli infection; Pertussis; Ras signaling pathway; NOD-like receptor signaling pathway; Colorectal cancer; Leukocyte transendothelial migration; Endocytosis; Neurotrophin signaling pathway; mTOR signaling pathway; MicroRNAs in cancer;…	Spinal Cord Injury; Regulation of Actin Cytoskeleton; Corticotropin-releasing hormone signaling pathway; Pathogenic Escherichia coli infection; MicroRNAs in cardiomyocyte hypertrophy; DNA Damage Response (only ATM dependent); Wnt Signaling Pathway; TGF-beta Signaling Pathway; Focal Adhesion; Hypothetical Craniofacial Development Pathway; Androgen receptor signaling pathway; VEGFA-VEGFR2 Signaling…	7	126.433	9.29952	92.8667	30.1048	80.7	11.5068	117.7	14.8348	99.9333	13.1637	82.4	3.85877	0.734511	0.638281	0.849051	0.700085			124.6	115.7
FALSE	High	Master Protein	Q08J23	tRNA (cytosine(34)-C(5))-methyltransferase OS=Homo sapiens GN=NSUN2 PE=1 SV=2	0	68.511	26	17	68	17	1	767	86.4	6.77	9838.7	66.34	17	17	cell division;metabolic process	cytoplasm;cytoskeleton;nucleus	catalytic activity;RNA binding	Pf01189, Pf13659	54888	ENSG00000037474.14	NSUN2	5			0	110.233	8.49659	96.0333	19.8257	89.0333	11.5749	106.567	10.5267	116.3	10.4254	81.8333	34.8884	0.871182	0.807681	1.09134	0.767907			109.6	101.2
FALSE	High	Master Protein	Q9Y4L1	Hypoxia up-regulated protein 1 OS=Homo sapiens GN=HYOU1 PE=1 SV=1	0	68.485	15	12	52	12	1	999	111.3	5.22	8696.59	61.7	12	12	regulation of biological process;response to stimulus;transport	endoplasmic reticulum;extracellular;membrane;organelle lumen	nucleotide binding;protein binding	Pf00012	10525	ENSG00000280682.2; ENSG00000149428.18	HYOU1	11; CHR_HG2217_PATCH	Protein processing in endoplasmic reticulum		0	100.3	15.7896	95.3667	4.29834	93.4333	14.7063	92.2	11.8072	110.767	4.81314	107.933	13.686	0.950814	0.931539	1.20137	1.17064			82.7	104.8
FALSE	High	Master Protein	O75390	Citrate synthase, mitochondrial OS=Homo sapiens GN=CS PE=1 SV=2	0	68.481	34	14	80	14	1	466	51.7	8.32	13526.5	69.38	14	14	metabolic process	mitochondrion;nucleus;organelle lumen	catalytic activity;RNA binding	Pf00285	1431	ENSG00000062485.18	CS	12	Metabolic pathways; Carbon metabolism; Glyoxylate and dicarboxylate metabolism; Biosynthesis of amino acids; 2-Oxocarboxylic acid metabolism; Citrate cycle (TCA cycle)	Amino Acid metabolism; TCA Cycle; TCA Cycle and Deficiency of Pyruvate Dehydrogenase complex (PDHc)	0	119.767	15.6015	112.467	9.12512	77.2333	5.25994	111.7	4.9918	106.133	13.4843	72.7333	4.29821	0.939048	0.644865	0.950164	0.651149			131.1	98.2
FALSE	High	Master Protein	P54819	Adenylate kinase 2, mitochondrial OS=Homo sapiens GN=AK2 PE=1 SV=2	0	68.474	56	11	56	11	1	239	26.5	7.81	10606.1	59.8	11	10	metabolic process	membrane;mitochondrion	catalytic activity;nucleotide binding	Pf00406, Pf05191, Pf13207, Pf13671	204	ENSG00000004455.16	AK2	1	Thiamine metabolism; Purine metabolism; Metabolic pathways		0	118.433	23.7248	118.2	9.62052	73.5667	29.6269	108.633	23.4039	117.9	11.0299	63.2333	20.3124	0.99803	0.621165	1.0853	0.58208			135.4	86
FALSE	High	Master Protein	P32119	Peroxiredoxin-2 OS=Homo sapiens GN=PRDX2 PE=1 SV=5	0	68.396	58	12	58	11	1	198	21.9	5.97	11236.8	72.4	12	12	cell communication;cellular homeostasis;metabolic process;regulation of biological process;response to stimulus	cytoplasm;cytosol;membrane	antioxidant activity;catalytic activity;protein binding	Pf00578, Pf08534, Pf10417	7001	ENSG00000167815.11	PRDX2	19		Selenium Micronutrient Network	0	146.4	21.152	113.367	2.43549	68.7	14.8472	111.833	10.843	90.4667	8.7753	69.2667	8.97572	0.774362	0.469262	0.808942	0.619374			180.7	120.5
FALSE	High	Master Protein	P33991	DNA replication licensing factor MCM4 OS=Homo sapiens GN=MCM4 PE=1 SV=5	0	68.128	18	14	43	14	1	863	96.5	6.74	7238.22	40.54	14	12	metabolic process	membrane;nucleus	catalytic activity;DNA binding;nucleotide binding;protein binding	Pf00493, Pf07728, Pf14551	4173	ENSG00000104738.16	MCM4	8	DNA replication; Cell cycle	Gastric Cancer Network 1; Cell Cycle; Retinoblastoma (RB) in Cancer; DNA Replication; G1 to S cell cycle control	0	112.433	8.39466	68.1667	42.6631	104.967	16.6881	74.2	55.0124	170.533	35.9659	69.6333	30.8357	0.606285	0.93359	2.29829	0.938455			120.6	102.1
FALSE	High	Master Protein	P09104	Gamma-enolase OS=Homo sapiens GN=ENO2 PE=1 SV=3	0	68.004	18	6	98	2	1	434	47.2	5.03	19000.9	148.19	6	6	metabolic process	cytoplasm;cytosol;membrane	catalytic activity;metal ion binding;protein binding	Pf00113, Pf03952, Pf13378	2026	ENSG00000111674.8	ENO2	12	RNA degradation; HIF-1 signaling pathway; Metabolic pathways; Glycolysis / Gluconeogenesis; Biosynthesis of amino acids; Carbon metabolism	Glycolysis and Gluconeogenesis	0	300.1	57.735	526	57.735	352.6	57.735	294.9	57.735	562.6	57.735	363.9	57.735	1.75275	1.17494	1.90777	1.23398			300.1
FALSE	High	Master Protein	Q15084-2	Isoform 2 of Protein disulfide-isomerase A6 OS=Homo sapiens GN=PDIA6	0	67.987	29	12	50	12	1	492	53.9	5.33	8574.41	51.46	12	11	cellular homeostasis;metabolic process;regulation of biological process;response to stimulus;transport	cytosol;endoplasmic reticulum;membrane;organelle lumen	catalytic activity;protein binding	Pf00085, Pf13098, Pf13848, Pf13899, Pf13905	10130	ENSG00000143870.12	PDIA6	2		Photodynamic therapy-induced unfolded protein response	0	114.733	22.8569	110.3	16.0387	78.6333	26.7928	91.1333	20.4159	126.2	5.81046	79.0667	8.46568	0.96136	0.685357	1.38478	0.867593			143.9	93.1
FALSE	High	Master Protein	Q86UP2	Kinectin OS=Homo sapiens GN=KTN1 PE=1 SV=1	0	67.812	14	16	47	16	1	1357	156.2	5.64	7611.34	53.28	16	15	cellular component movement;metabolic process	endoplasmic reticulum;membrane;organelle lumen	protein binding;RNA binding		3895	ENSG00000126777.17	KTN1	14			0	88.2	22.3494	111.3	42.0935	99.7667	25.0226	97.7	11.5056	98.4667	45.5317	104.533	2.71477	1.2619	1.13114	1.00785	1.06994			65.5	101
FALSE	High	Master Protein	P11717	Cation-independent mannose-6-phosphate receptor OS=Homo sapiens GN=IGF2R PE=1 SV=3	0	67.693	6	17	56	17	1	2491	274.2	5.94	8902.74	69.32	17	17	cell organization and biogenesis;regulation of biological process;response to stimulus;transport	cell surface;cytoplasm;endosome;Golgi;membrane;nucleus;vacuole	catalytic activity;protein binding;receptor activity;signal transducer activity;transporter activity	Pf00040, Pf00878, Pf02157, Pf09451	3482	ENSG00000197081.12	IGF2R	6	Lysosome; Endocytosis		0	143.867	8.82032	87.1667	41.2149	92.7	12.8244	95.5667	37.8869	96.2667	12.4953	84.4667	12.7786	0.605885	0.644347	1.00732	0.883851			140.5	133.2
FALSE	High	Master Protein	O95757	Heat shock 70 kDa protein 4L OS=Homo sapiens GN=HSPA4L PE=1 SV=3	0	67.572	14	13	67	7	1	839	94.5	5.88	11974.6	82.91	13	13	metabolic process;response to stimulus	cytoplasm;cytosol;nucleus	nucleotide binding	Pf00012	22824	ENSG00000164070.11	HSPA4L	4	Protein processing in endoplasmic reticulum		1	109.333	32.7232	92.6	7.17391	93.7	12.0196	87.4	9.37727	121.767	13.8404	95.2	29.0213	0.846951	0.857012	1.39321	1.08924			148.7	100.5
FALSE	High	Master Protein	O75592	E3 ubiquitin-protein ligase MYCBP2 OS=Homo sapiens GN=MYCBP2 PE=1 SV=3	0	67.519	4	17	74	17	1	4640	509.8	7.03	11263.2	85.86	17	17	metabolic process;regulation of biological process	membrane;nucleus	catalytic activity;metal ion binding;protein binding	Pf00415, Pf08005, Pf08239, Pf13540, Pf13639, Pf13923	23077	ENSG00000005810.17	MYCBP2	13		Integrated Breast Cancer Pathway	0	167.75	62.1626	83	58.8822	98.35	58.4961	219.7	58.0515	127.75	58.1217	103.35	59.5432	0.494784	0.586289	0.581475	0.470414			129.1
FALSE	High	Master Protein	O43776	Asparagine--tRNA ligase, cytoplasmic OS=Homo sapiens GN=NARS PE=1 SV=1	0	67.495	30	12	51	12	1	548	62.9	6.25	8266.96	47.55	12	11	metabolic process	cytoplasm;cytosol;mitochondrion	catalytic activity;nucleotide binding	Pf00152, Pf01336	4677	ENSG00000134440.11	NARS	18	Aminoacyl-tRNA biosynthesis	Photodynamic therapy-induced unfolded protein response	0	101	12.9862	99.5333	10.4673	84.9333	8.04285	104.433	10.9698	103.233	29.5954	106.833	33.4565	0.985479	0.840924	0.988509	1.02298			91.2	95.9
FALSE	High	Master Protein	P13647	Keratin, type II cytoskeletal 5 OS=Homo sapiens GN=KRT5 PE=1 SV=3	0	67.418	23	15	83	6	1	590	62.3	7.74	13263.4	73.5	15	15	cell death;cell organization and biogenesis;metabolic process	cytoplasm;cytosol;membrane;mitochondrion;nucleus	catalytic activity;motor activity;protein binding;structural molecule activity	Pf00038, Pf01576, Pf02994, Pf03961, Pf04111, Pf05957, Pf12128	3852	ENSG00000186081.11	KRT5	12			2	57.6	95.4179	171.733	59.3406	129.9	94.2137	57.1667	100.814	76.7333	69.1871	106.9	82.732	2.98148	2.25521	1.34227	1.86997			21	120.8
FALSE	High	Master Protein	P27635	60S ribosomal protein L10 OS=Homo sapiens GN=RPL10 PE=1 SV=4	0	67.397	36	6	49	6	1	214	24.6	10.08	7735.62	51	6	6	cell organization and biogenesis;metabolic process;regulation of biological process;transport	cytosol;endoplasmic reticulum;membrane;nucleus;ribosome	protein binding;RNA binding;structural molecule activity;translation regulator activity	Pf00252	6134		RPL10	X	Ribosome	Cytoplasmic Ribosomal Proteins	0	55.6333	12.0931	78.7	16.0117	140.933	5.80203	69.3333	19.0168	100.7	34.8515	154.733	14.572	1.41462	2.53325	1.4524	2.23173			58.2	60.7
FALSE	High	Master Protein	Q8NBS9	Thioredoxin domain-containing protein 5 OS=Homo sapiens GN=TXNDC5 PE=1 SV=2	0	67.379	35	16	63	16	1	432	47.6	5.97	10627.4	65.83	15	16	cellular homeostasis;metabolic process;regulation of biological process;response to stimulus;transport	endoplasmic reticulum;extracellular;organelle lumen	catalytic activity;protein binding	Pf00085, Pf13098, Pf13905	81567	ENSG00000239264.8	TXNDC5	6	Protein processing in endoplasmic reticulum		0	124.1	13.5483	106	3.61827	82.0333	12.0715	97.7	11.4289	105.767	2.59677	84.4	7.50197	0.85415	0.661026	1.08257	0.863869			142.1	108.8
FALSE	High	Master Protein	Q13895	Bystin OS=Homo sapiens GN=BYSL PE=1 SV=3	0	67.378	45	16	61	16	1	437	49.6	8.12	9958.79	60.87	16	15	cell differentiation;cell proliferation;metabolic process	cytoplasm;cytosol;membrane;nucleus	protein binding;RNA binding	Pf05291	705	ENSG00000112578.9	BYSL	6			0	174.067	48.484	68.3667	39.3715	71.2	29.3015	141.233	6.89914	80.3667	25.4289	64.7667	46.1196	0.392761	0.409039	0.569035	0.458579			84.9	184.6
FALSE	High	Master Protein	P23246	Splicing factor, proline- and glutamine-rich OS=Homo sapiens GN=SFPQ PE=1 SV=2	0	66.875	22	16	58	15	1	707	76.1	9.44	8698.14	44.27	16	16	cell organization and biogenesis;defense response;metabolic process;regulation of biological process;response to stimulus	chromosome;cytoplasm;nucleus	DNA binding;protein binding;RNA binding	Pf00076, Pf08075, Pf13893, Pf14259	6421	ENSG00000116560.10	SFPQ	1		mRNA Processing	1	128.667	42.7911	124.633	20.3419	73.2333	30.2985	92.2333	7.52125	92.0667	36.2339	89.1333	21.687	0.968653	0.569171	0.998193	0.96639			192	101.8
FALSE	High	Master Protein	Q92499	ATP-dependent RNA helicase DDX1 OS=Homo sapiens GN=DDX1 PE=1 SV=2	0	66.833	21	13	51	13	1	740	82.4	7.23	7673.41	57.26	13	12	cell organization and biogenesis;development;metabolic process;regulation of biological process;response to stimulus	cytoplasm;cytosol;membrane;nucleus	catalytic activity;DNA binding;nucleotide binding;protein binding;RNA binding	Pf00270, Pf00271, Pf00622	1653	ENSG00000079785.14	DDX1	2		mRNA Processing; DDX1 as a regulatory component of the Drosha microprocessor	0	107.8	11.3533	97.7667	5.64544	92.2	13.6146	92.1667	12.7279	114.433	12.8362	95.7	3.00861	0.906926	0.855288	1.24159	1.03834			119.1	94.8
FALSE	High	Master Protein	P30044	Peroxiredoxin-5, mitochondrial OS=Homo sapiens GN=PRDX5 PE=1 SV=4	0	66.825	56	9	66	9	1	214	22.1	8.7	12136	88.47	9	9	cell death;cellular homeostasis;defense response;metabolic process;regulation of biological process;response to stimulus	cytoplasm;cytosol;mitochondrion;nucleus;organelle lumen	antioxidant activity;catalytic activity;DNA binding;enzyme regulator activity;protein binding	Pf00578, Pf08534	25824	ENSG00000126432.13	PRDX5	11	Peroxisome	Selenium Micronutrient Network	0	140.5	19.064	133.6	17.0305	62.7	35.141	125	12.4718	84.5333	30.4618	53.6	25.8118	0.95089	0.446263	0.676267	0.4288			162.3	110.6
FALSE	High	Master Protein	Q7KZF4	Staphylococcal nuclease domain-containing protein 1 OS=Homo sapiens GN=SND1 PE=1 SV=1	0	66.809	17	11	46	11	1	910	101.9	7.17	8035.67	49.01	11	11	cell differentiation;metabolic process;regulation of biological process	cytoplasm;cytosol;membrane;mitochondrion;nucleus	catalytic activity;protein binding;RNA binding	Pf00565, Pf00567	27044	ENSG00000197157.10	SND1	7	Epstein-Barr virus infection; Viral carcinogenesis		0	98.8	34.7113	95.4333	1.40714	94.9	23.3077	106.3	5.96532	107.867	22.9124	96.7	25.6738	0.965924	0.960526	1.01474	0.90969			70.4	89.1
FALSE	High	Master Protein	P14314	Glucosidase 2 subunit beta OS=Homo sapiens GN=PRKCSH PE=1 SV=2	0	66.638	24	15	73	15	1	528	59.4	4.41	12804.1	99.28	15	15	metabolic process;regulation of biological process;response to stimulus	endoplasmic reticulum;organelle lumen	metal ion binding;protein binding	Pf07915, Pf12999, Pf13015	5589	ENSG00000130175.9	PRKCSH	19	Protein processing in endoplasmic reticulum		0	132.033	34.6106	147.5	27.3372	70.6333	45.8096	80.4333	23.066	98.9333	14.2718	70.5	43.4425	1.11714	0.534966	1.23	0.876502			182.3	93
FALSE	High	Master Protein	O43242	26S proteasome non-ATPase regulatory subunit 3 OS=Homo sapiens GN=PSMD3 PE=1 SV=2	0	66.155	31	15	46	15	1	534	60.9	8.44	7498.53	45.19	15	14	metabolic process;regulation of biological process;response to stimulus;transport	cytosol;extracellular;membrane;nucleus;organelle lumen;proteasome	catalytic activity;enzyme regulator activity;protein binding	Pf01399, Pf08375	5709	ENSG00000108344.14	PSMD3	17	Proteasome; Epstein-Barr virus infection	Proteasome Degradation; Parkin-Ubiquitin Proteasomal System pathway	0	155.05	57.9189	102.85	60.0679	115.45	57.8363	170.7	57.7583	151.4	57.936	104.5	57.7506	0.663334	0.744599	0.886936	0.612185				147.9
FALSE	High	Master Protein	P40429	60S ribosomal protein L13a OS=Homo sapiens GN=RPL13A PE=1 SV=2	0	66.069	37	12	144	12	1	203	23.6	10.93	24786	169	12	12	cell organization and biogenesis;metabolic process;regulation of biological process;response to stimulus;transport	cytoplasm;cytosol;membrane;nucleus;ribosome	RNA binding;structural molecule activity	Pf00572	23521	ENSG00000142541.16	RPL13A	19	Ribosome	Cytoplasmic Ribosomal Proteins	0	53	31.5772	87.5	34.6305	135.733	18.8525	67.8667	14.242	101.267	32.8949	154.633	1.3875	1.65094	2.56101	1.49214	2.27849			33.8	64.5
FALSE	High	Master Protein	O95163	Elongator complex protein 1 OS=Homo sapiens GN=ELP1 PE=1 SV=3	0	66.018	10	13	38	13	1	1332	150.2	5.94	6963.61	52.08	13	13	cell organization and biogenesis;metabolic process;regulation of biological process;response to stimulus	cytoplasm;cytosol;nucleus	enzyme regulator activity;protein binding;signal transducer activity	Pf04762	8518	ENSG00000070061.14	IKBKAP; ELP1	9			0	177.55	60.6789	134.05	61.0864	103.2	57.9805	181.55	58.5387	135.55	61.5331	68.05	60.4763	0.754999	0.581245	0.746626	0.374828			144.4
FALSE	High	Master Protein	Q99471	Prefoldin subunit 5 OS=Homo sapiens GN=PFDN5 PE=1 SV=2	0	65.978	56	10	56	10	1	154	17.3	6.33	9760.93	75.79	10	10	metabolic process;regulation of biological process	cytoplasm;nucleus	protein binding	Pf02996	5204	ENSG00000123349.13	PFDN5	12			0	228.95	58.4973	177.05	59.8247	80.9	57.8387	111.6	60.5597	110.45	59.6478	90.95	60.09	0.773313	0.353352	0.989695	0.814964			250.5
FALSE	High	Master Protein	P09936	Ubiquitin carboxyl-terminal hydrolase isozyme L1 OS=Homo sapiens GN=UCHL1 PE=1 SV=2	0	65.846	51	9	71	9	1	223	24.8	5.48	11642.8	79.88	9	9	cell communication;cell organization and biogenesis;cell proliferation;cellular component movement;metabolic process;regulation of biological process;response to stimulus;transport	cytoplasm;cytosol;endoplasmic reticulum;membrane	catalytic activity;protein binding	Pf01088	7345	ENSG00000154277.12	UCHL1	4	Parkinson's disease	Proteasome Degradation; Hepatitis C and Hepatocellular Carcinoma; Parkinsons Disease Pathway	0	148.833	17.7876	102.7	15.0897	68.3	19.4878	124.733	16.0154	92.9333	14.4415	62.4667	10.3206	0.690034	0.458903	0.745056	0.500802			173.1	120.6
FALSE	High	Master Protein	Q9NR30	Nucleolar RNA helicase 2 OS=Homo sapiens GN=DDX21 PE=1 SV=5	0	65.806	21	14	68	14	1	783	87.3	9.28	11218	79.34	14	14	cell differentiation;metabolic process;regulation of biological process;response to stimulus	cytoplasm;membrane;nucleus	catalytic activity;nucleotide binding;protein binding;RNA binding	Pf00270, Pf00271, Pf08152, Pf14617	9188	ENSG00000165732.12	DDX21	10			0	109.367	4.87304	90.2	3.6753	96	12.7582	83.8667	14.1974	117.967	2.40563	102.567	4.89563	0.824749	0.877781	1.4066	1.22297			105.3	107.4
FALSE	High	Master Protein	P07741	Adenine phosphoribosyltransferase OS=Homo sapiens GN=APRT PE=1 SV=2	0	65.695	75	10	49	10	1	180	19.6	6.02	8006.25	53.45	10	10	metabolic process;response to stimulus;transport	cytoplasm;cytosol;extracellular;organelle lumen	catalytic activity;nucleotide binding	Pf00156	353	ENSG00000198931.10	APRT	16	Metabolic pathways; Purine metabolism		0	103.133	11.9118	121	16.8621	92.9333	7.71029	138.733	32.6424	85.2667	21.8408	58.9333	70.6894	1.17324	0.901099	0.614608	0.424796			90.1	104.8
FALSE	High	Master Protein	P55327-3	Isoform 3 of Tumor protein D52 OS=Homo sapiens GN=TPD52	0	65.506	21	6	38	6	1	248	26.4	6.34	8010.85	57.02	6	6	cell differentiation;transport	cytoplasm;endoplasmic reticulum	metal ion binding;protein binding	Pf04201	7163		TPD52	8			0	123.2	38.8697	97.9	14.9687	79.2	41.3856	97.0333	27.2029	130.733	18.4574	72	49.0991	0.794643	0.642857	1.3473	0.742013			173.6	78.3
FALSE	High	Master Protein	P04259	Keratin, type II cytoskeletal 6B OS=Homo sapiens GN=KRT6B PE=1 SV=5	0	65.449	20	13	84	1	1	564	60	8	13413.1	76.82	13	13	cell death;cell organization and biogenesis;metabolic process	cytosol	catalytic activity;motor activity;protein binding;structural molecule activity	Pf00038, Pf01576, Pf04111, Pf13166	3854	ENSG00000185479.5	KRT6B	12			0	30.4	58.5723	359.25	66.4176	133.45	96.7174	25.95	63.1667	44.25	67.7065	206.7	111.059	11.8174	4.3898	1.7052	7.96532			33.4
FALSE	High	Master Protein	P62269	40S ribosomal protein S18 OS=Homo sapiens GN=RPS18 PE=1 SV=3	0	65.433	51	12	93	12	1	152	17.7	10.99	15906.8	102.25	12	12	cell organization and biogenesis;metabolic process;transport	cytoplasm;cytosol;membrane;nucleus;ribosome	protein binding;RNA binding;structural molecule activity	Pf00416	6222	ENSG00000223367.6; ENSG00000096150.9; ENSG00000235650.6; ENSG00000226225.6; ENSG00000231500.6	RPS18	6; CHR_HSCHR6_MHC_DBB_CTG1; CHR_HSCHR6_MHC_QBL_CTG1; CHR_HSCHR6_MHC_COX_CTG1; CHR_HSCHR6_MHC_MCF_CTG1	Ribosome	Cytoplasmic Ribosomal Proteins	0	67.8333	42.2994	68.7	11.2638	129.633	10.4997	110.333	24.5207	69.5	5.06058	154.067	19.5405	1.01278	1.91106	0.629909	1.39637			37.9	95.1
FALSE	High	Master Protein	P06744	Glucose-6-phosphate isomerase OS=Homo sapiens GN=GPI PE=1 SV=4	0	65.339	27	12	62	12	1	558	63.1	8.32	10012.7	63.43	12	12	metabolic process;regulation of biological process;response to stimulus;transport	cytoplasm;cytosol;extracellular;membrane;organelle lumen	catalytic activity;protein binding	Pf00342	2821	ENSG00000105220.14	GPI	19	Glycolysis / Gluconeogenesis; Metabolic pathways; Starch and sucrose metabolism; Amino sugar and nucleotide sugar metabolism; Pentose phosphate pathway; Carbon metabolism	Glycolysis and Gluconeogenesis; Cori Cycle	0	127.633	21.8715	105.933	1.77192	75.4667	17.5595	106.867	9.24938	101.967	12.9589	82.0667	7.4413	0.829982	0.591277	0.954148	0.767935			155	99.2
FALSE	High	Master Protein	Q96EY7	Pentatricopeptide repeat domain-containing protein 3, mitochondrial OS=Homo sapiens GN=PTCD3 PE=1 SV=3	0	65.082	23	12	40	12	1	689	78.5	6.42	6525.12	44.31	11	12	cell organization and biogenesis;metabolic process;regulation of biological process	cytosol;membrane;mitochondrion;ribosome	protein binding;RNA binding	Pf13041, Pf13812	55037	ENSG00000132300.18	PTCD3	2			0	100.267	19.8732	104.967	26.8397	77.9667	39.7151	127.733	42.1939	115.4	17.199	73.6333	19.1953	1.04687	0.777593	0.903445	0.576461			78.4	105
FALSE	High	Master Protein	Q07021	Complement component 1 Q subcomponent-binding protein, mitochondrial OS=Homo sapiens GN=C1QBP PE=1 SV=1	0	64.982	26	5	36	5	1	282	31.3	4.84	6640.44	32.54	5	5	cell death;cell organization and biogenesis;defense response;metabolic process;regulation of biological process;response to stimulus	cell surface;cytoplasm;cytosol;extracellular;membrane;mitochondrion;nucleus;organelle lumen	protein binding;RNA binding	Pf02330	708	ENSG00000108561.8	C1QBP	17	Herpes simplex infection	Mesodermal Commitment Pathway	0	202.8	57.9053	271.3	59.5335	154.3	68.472	179.8	58.6545	225.95	59.5051	165.85	59.6174	1.33777	0.760848	1.25667	0.922414				211.8
FALSE	High	Master Protein	Q92552-2	Isoform 2 of 28S ribosomal protein S27, mitochondrial OS=Homo sapiens GN=MRPS27	0	64.846	37	13	65	13	1	428	49.1	6.33	10206.8	54.76	13	12	cell organization and biogenesis;cell proliferation;metabolic process;regulation of biological process	cytoplasm;membrane;mitochondrion	protein binding;RNA binding	Pf10037, Pf12854, Pf13041	23107	ENSG00000113048.16	MRPS27	5			0	85.5667	32.6782	120.7	21.9064	84.0333	21.8067	102.367	2.47391	109.867	21.7794	97.4	47.9479	1.4106	0.98208	1.07327	0.951482			53.3	100.7
FALSE	High	Master Protein	Q8N163	Cell cycle and apoptosis regulator protein 2 OS=Homo sapiens GN=CCAR2 PE=1 SV=2	0	64.523	16	11	48	11	1	923	102.8	5.22	8195.68	52.97	11	11	cell death;cell organization and biogenesis;metabolic process;regulation of biological process;response to stimulus	cytoplasm;nucleus;organelle lumen;spliceosomal complex	enzyme regulator activity;protein binding;RNA binding	Pf14443, Pf14444	57805	ENSG00000158941.16	KIAA1967; CCAR2	8			0	102	2.02588	70.6333	26.1791	77.8333	6.62304	113.733	16.2403	128.767	4.81575	107.1	13.6331	0.692484	0.763072	1.13218	0.941676			100.1	101.7
FALSE	High	Master Protein	P51148-2	Isoform 2 of Ras-related protein Rab-5C OS=Homo sapiens GN=RAB5C	0	64.485	42	7	38	5	1	249	27	8.66	7441.57	48.35	7	7	regulation of biological process;response to stimulus;transport	endosome;membrane	catalytic activity;nucleotide binding;protein binding	Pf00009, Pf00025, Pf00071, Pf04670, Pf08477	5878	ENSG00000108774.14	RAB5C	17			1	101.533	40.5503	116.967	34.1183	81.9	16.8264	120.267	6.28986	92.7	16.8174	86.6667	8.33436	1.152	0.806632	0.770787	0.720621			66.1	91.8
FALSE	High	Master Protein	Q9UKV3	Apoptotic chromatin condensation inducer in the nucleus OS=Homo sapiens GN=ACIN1 PE=1 SV=2	0	64.449	12	17	59	16	1	1341	151.8	6.43	9157.55	58.51	17	16	cell death;cell differentiation;cell organization and biogenesis;metabolic process;regulation of biological process	cytosol;membrane;nucleus	catalytic activity;protein binding;RNA binding	Pf02037, Pf13893	22985	ENSG00000100813.14	ACIN1	14	Spliceosome; mRNA surveillance pathway; RNA transport		1	35.1667	16.9721	128.7	19.8224	126.167	31.1089	36.5667	22.4387	152.333	25.8744	121.1	6.80592	3.65972	3.58768	4.16591	3.31176			30	33.8
FALSE	High	Master Protein	Q16881	Thioredoxin reductase 1, cytoplasmic OS=Homo sapiens GN=TXNRD1 PE=1 SV=3	0	64.115	20	10	45	10	1	649	70.9	7.39	8162.35	56.79	10	10	cell proliferation;cellular homeostasis;metabolic process;regulation of biological process;response to stimulus;transport	cytoplasm;cytosol;mitochondrion;nucleus	antioxidant activity;catalytic activity;nucleotide binding;protein binding	Pf00070, Pf00462, Pf02852, Pf07992, Pf13738	7296	ENSG00000198431.15	TXNRD1	12	Pyrimidine metabolism; Selenocompound metabolism	Selenium Metabolism and Selenoproteins; NRF2 pathway; Oxidative Stress; Selenium Micronutrient Network	0	110.867	17.0531	105	3.12259	91.5	16.8699	101.067	10.7282	115.167	20.8057	76.4	27.642	0.947084	0.825316	1.13951	0.755937			120.3	89.1
FALSE	High	Master Protein	P05556	Integrin beta-1 OS=Homo sapiens GN=ITGB1 PE=1 SV=2	0	64.028	16	11	53	11	1	798	88.4	5.39	8573.53	58.38	11	11	cell differentiation;cell growth;cell organization and biogenesis;cellular component movement;defense response;metabolic process;regulation of biological process;response to stimulus;transport	cell surface;cytoplasm;endosome;membrane	enzyme regulator activity;metal ion binding;protein binding;receptor activity;signal transducer activity	Pf00362, Pf07965, Pf08725	3688	ENSG00000150093.18	ITGB1	10	Small cell lung cancer; Focal adhesion; Pathways in cancer; Pathogenic Escherichia coli infection; Axon guidance; Leukocyte transendothelial migration; Toxoplasmosis; Rap1 signaling pathway; Platelet activation; Proteoglycans in cancer; Dilated cardiomyopathy; PI3K-Akt signaling pathway; Phagosome; Arrhythmogenic right ventricular cardiomyopathy (ARVC); ECM-receptor interaction; Pertussis; Bacter…	Focal Adhesion; Focal Adhesion-PI3K-Akt-mTOR-signaling pathway; Rac1/Pak1/p38/MMP-2 pathway; Neural Crest Differentiation; Pathogenic Escherichia coli infection; Prolactin Signaling Pathway; Signaling of Hepatocyte Growth Factor Receptor; Integrin-mediated Cell Adhesion; Factors and pathways affecting insulin-like growth factor (IGF1)-Akt signaling; Primary Focal Segmental Glomerulosclerosis FSGS…	0	137.75	57.7364	158.7	59.829	118.65	62.5163	146.4	59.3293	130.75	63.7843	107.75	57.7874	1.15209	0.861343	0.893101	0.735997			137.2
FALSE	High	Master Protein	P62249	40S ribosomal protein S16 OS=Homo sapiens GN=RPS16 PE=1 SV=2	0	63.961	64	14	87	14	1	146	16.4	10.21	15064.8	87.61	14	13	cell organization and biogenesis;metabolic process;transport	cytosol;membrane;ribosome	protein binding;RNA binding;structural molecule activity	Pf00380	6217	ENSG00000105193.8	RPS16	19	Ribosome	Cytoplasmic Ribosomal Proteins	0	58.3	53.0927	74.0333	8.19438	134.3	11.9962	98.5	19.914	66.1	27.7646	168.8	16.7263	1.26987	2.3036	0.671066	1.71371			23	80.8
FALSE	High	Master Protein	O14744	Protein arginine N-methyltransferase 5 OS=Homo sapiens GN=PRMT5 PE=1 SV=4	0	63.96	22	10	56	10	1	637	72.6	6.29	9555.73	59.15	10	10	cell organization and biogenesis;cell proliferation;metabolic process;regulation of biological process	cytoplasm;cytosol;Golgi;nucleus	catalytic activity;DNA binding;nucleotide binding;protein binding	Pf02475, Pf05185	10419	ENSG00000100462.15	PRMT5	14	RNA transport		0	110.167	18.5148	93.9	9.0822	85.5333	3.35876	118.2	10.7871	94.9667	23.2721	97.2333	25.6257	0.852345	0.776399	0.80344	0.822617			91.6	106.9
FALSE	High	Master Protein	Q9Y230	RuvB-like 2 OS=Homo sapiens GN=RUVBL2 PE=1 SV=3	0	63.916	30	13	64	13	1	463	51.1	5.64	10511.7	68.17	13	13	cell organization and biogenesis;metabolic process;regulation of biological process;response to stimulus	cytoplasm;cytosol;membrane;nucleus	catalytic activity;DNA binding;nucleotide binding;protein binding	Pf00004, Pf03796, Pf06068, Pf13481	10856	ENSG00000183207.13	RUVBL2	19			0	109.7	17.4583	101.567	15.6613	83.6	7.89564	129.967	5.77139	84.8667	17.1081	90.3667	4.52265	0.925858	0.762078	0.652988	0.695306			93.9	104.2
FALSE	High	Master Protein	Q9BZZ5	Apoptosis inhibitor 5 OS=Homo sapiens GN=API5 PE=1 SV=3	0	63.653	22	12	61	12	1	524	59	7.34	10106.7	72.31	12	12	cell death;regulation of biological process	cytoplasm;membrane;nucleus;spliceosomal complex	protein binding;RNA binding	Pf05918, Pf13646	8539	ENSG00000166181.12	API5	11			0	102.267	13.3059	94.1667	6.95582	80.3	2.30638	123.933	12.0659	117.033	15.6851	82.2333	8.81057	0.920795	0.785202	0.944325	0.663529			105	87.5
FALSE	High	Master Protein	P62979	Ubiquitin-40S ribosomal protein S27a OS=Homo sapiens GN=RPS27A PE=1 SV=2	0	63.639	67	10	57	4	1	156	18	9.64	9892.05	57.28	10	10	cell communication;cell organization and biogenesis;cellular homeostasis;defense response;metabolic process;regulation of biological process;response to stimulus;transport	cytoplasm;cytosol;membrane;nucleus;ribosome	metal ion binding;protein binding;RNA binding;structural molecule activity	Pf00240, Pf01599, Pf11976, Pf13019, Pf13881, Pf14560	6233	ENSG00000143947.13	RPS27A	2	Ribosome	Cytoplasmic Ribosomal Proteins	6	102.1	15.6479	96.7	42.7938	105.167	19.2552	80.6	33.8873	116.833	46.1786	98.6	11.2512	0.947111	1.03004	1.44955	1.22333			89.6	120.1
FALSE	High	Master Protein	Q9BYD6	39S ribosomal protein L1, mitochondrial OS=Homo sapiens GN=MRPL1 PE=1 SV=2	0	63.481	43	13	50	13	1	325	36.9	8.78	8785.69	48.76	13	12	cell organization and biogenesis;metabolic process	membrane;mitochondrion;ribosome	protein binding;RNA binding;structural molecule activity	Pf00687, Pf13003	65008	ENSG00000169288.17	MRPL1	4	Ribosome		0	129.133	30.8557	81.9	24.1841	69.1	12.8408	158.233	25.1667	102.767	10.9679	58.8667	14.8428	0.634228	0.535106	0.649463	0.372024			84.3	142.6
FALSE	High	Master Protein	P38606	V-type proton ATPase catalytic subunit A OS=Homo sapiens GN=ATP6V1A PE=1 SV=2	0	63.459	27	15	48	15	1	617	68.3	5.52	7219.94	37.29	15	15	cellular homeostasis;metabolic process;regulation of biological process;response to stimulus;transport	cytosol;membrane;mitochondrion	catalytic activity;nucleotide binding;transporter activity	Pf00006, Pf00306, Pf02874	523	ENSG00000114573.9	ATP6V1A	3	Rheumatoid arthritis; Metabolic pathways; Collecting duct acid secretion; Oxidative phosphorylation; Phagosome; Synaptic vesicle cycle; Epithelial cell signaling in Helicobacter pylori infection; Vibrio cholerae infection; mTOR signaling pathway		0	122.333	15.1269	105.9	4.52766	82.2333	11.6515	98.2333	13.3447	110.567	4.49434	80.7	19.6269	0.865668	0.672207	1.12555	0.821513			143.6	113.5
FALSE	High	Master Protein	P16949-2	Isoform 2 of Stathmin OS=Homo sapiens GN=STMN1	0	63.301	36	9	61	9	1	174	19.8	7.02	11814.9	88.12	9	9	cell organization and biogenesis;regulation of biological process;response to stimulus	cytoplasm;cytosol;membrane	protein binding;signal transducer activity	Pf00836	3925	ENSG00000117632.22	STMN1	1		Regulation of Microtubule Cytoskeleton; EGF/EGFR Signaling Pathway; Rac1/Pak1/p38/MMP-2 pathway; Retinoblastoma (RB) in Cancer; MAPK Signaling Pathway	0	120.9	16.2001	131.2	17.7144	69.3	40.109	108.233	19.7389	111.833	24.7566	58.4667	33.06	1.08519	0.573201	1.03326	0.540191			134.8	98.5
FALSE	High	Master Protein	P46013	Proliferation marker protein Ki-67 OS=Homo sapiens GN=MKI67 PE=1 SV=2	0	63.1	7	17	58	17	1	3256	358.5	9.45	9024.25	62.22	16	15	cell proliferation;metabolic process;regulation of biological process;response to stimulus	chromosome;cytoplasm;membrane;nucleus	DNA binding;nucleotide binding;protein binding;RNA binding	Pf00498, Pf08065, Pf15276	4288	ENSG00000148773.13	MKI67	10		Primary Focal Segmental Glomerulosclerosis FSGS	0	97.2667	21.7076	80.5667	3.30575	90.5	26.2202	100.1	12.1989	124	3.84061	107.533	12.4506	0.828307	0.930432	1.23876	1.07426			99.8	75
FALSE	High	Master Protein	P63241-2	Isoform 2 of Eukaryotic translation initiation factor 5A-1 OS=Homo sapiens GN=EIF5A	0	62.754	42	10	88	10	1	184	20.2	7.01	15105.8	94.65	10	10	cell death;cellular homeostasis;metabolic process;regulation of biological process;response to stimulus;transport	cytoplasm;cytosol;membrane;nucleus	protein binding;RNA binding	Pf01287	1984	ENSG00000132507.17	EIF5A	17		Translation Factors; eIF5A regulation in response to inhibition of the nuclear export system	0	162.2	27.6697	129.833	6.26171	62.1	44.7795	102.867	18.2981	91.6667	21.9986	51.3	26.6985	0.800452	0.382861	0.891121	0.498704			206.1	116.4
FALSE	High	Master Protein	Q9Y3F4-2	Isoform 2 of Serine-threonine kinase receptor-associated protein OS=Homo sapiens GN=STRAP	0	62.666	44	12	47	12	1	363	39.8	5.31	9510.75	56.89	12	12	cell organization and biogenesis;regulation of biological process	cytoplasm;cytosol	protein binding;RNA binding	Pf00400	11171	ENSG00000023734.10	STRAP	12		TGF-beta Signaling Pathway	0	117.467	14.2263	101.833	10.3032	87.9333	6.95507	128.267	16.7908	83.3667	19.2344	81.1667	11.5084	0.866913	0.748581	0.649948	0.632796			106.5	109.2
FALSE	High	Master Protein	Q13423	NAD(P) transhydrogenase, mitochondrial OS=Homo sapiens GN=NNT PE=1 SV=3	0	62.635	13	12	46	12	1	1086	113.8	8.09	8409.8	63.99	12	11	metabolic process;transport	membrane;mitochondrion	catalytic activity;nucleotide binding;transporter activity	Pf01262, Pf02233, Pf05222, Pf12769	23530	ENSG00000112992.16	NNT	5	Metabolic pathways; Nicotinate and nicotinamide metabolism		0	88.0667	15.066	84.2333	17.2979	104.633	14.9753	106.167	12.5901	124.133	4.80141	92.8	12.5681	0.956472	1.18812	1.16923	0.874097			76.4	85.3
FALSE	High	Master Protein	P62140	Serine/threonine-protein phosphatase PP1-beta catalytic subunit OS=Homo sapiens GN=PPP1CB PE=1 SV=3	0	62.611	33	10	50	2	1	327	37.2	6.19	8619.56	53.15	10	10	cell division;metabolic process;regulation of biological process;response to stimulus	cytoplasm;cytosol;nucleus	catalytic activity;metal ion binding;protein binding	Pf00149	5500	ENSG00000213639.9	PPP1CB	2	Focal adhesion; Oxytocin signaling pathway; cAMP signaling pathway; Amphetamine addiction; Herpes simplex infection; Dopaminergic synapse; Regulation of actin cytoskeleton; Adrenergic signaling in cardiomyocytes; Platelet activation; Hippo signaling pathway; Alcoholism; Insulin signaling pathway; Oocyte meiosis; Proteoglycans in cancer; Long-term potentiation; cGMP-PKG signaling pathway; Vascular…	G13 Signaling Pathway; Common Pathways Underlying Drug Addiction	0	197.5	57.8259	217.8	59.8082	163.8	58.1827	184.7	57.7679	230.25	59.4821	205.95	58.6075	1.10278	0.829367	1.24662	1.11505				203.9
FALSE	High	Master Protein	P61221	ATP-binding cassette sub-family E member 1 OS=Homo sapiens GN=ABCE1 PE=1 SV=1	0	62.231	27	14	58	14	1	599	67.3	8.34	10482.5	59.69	14	13	cell organization and biogenesis;metabolic process;regulation of biological process;transport	cytoplasm;cytosol;membrane;mitochondrion;organelle lumen	catalytic activity;enzyme regulator activity;metal ion binding;nucleotide binding;protein binding	Pf00005, Pf04068, Pf13304, Pf13671	6059	ENSG00000164163.10	ABCE1	4			0	139.967	31.281	105.7	4.26468	82.9333	8.75283	104.7	3.23471	92.7667	20.1481	73.9333	20.0893	0.75518	0.592522	0.886024	0.706145			189.2	105.4
FALSE	High	Master Protein	P62136	Serine/threonine-protein phosphatase PP1-alpha catalytic subunit OS=Homo sapiens GN=PPP1CA PE=1 SV=1	0	61.935	32	10	48	2	1	330	37.5	6.33	8303.2	52.84	10	10	cell division;metabolic process;regulation of biological process;response to stimulus	cytoplasm;cytosol;membrane;nucleus	catalytic activity;metal ion binding;protein binding	Pf00149	5499	ENSG00000172531.14	PPP1CA	11	Oxytocin signaling pathway; Insulin signaling pathway; Insulin resistance; Oocyte meiosis; Focal adhesion; cGMP-PKG signaling pathway; Dopaminergic synapse; Alcoholism; Regulation of actin cytoskeleton; Long-term potentiation; Herpes simplex infection; Hippo signaling pathway; mRNA surveillance pathway; Amphetamine addiction; Platelet activation; Proteoglycans in cancer; Vascular smooth muscle co…	Nicotine Activity on Dopaminergic Neurons; Common Pathways Underlying Drug Addiction	9	99.7	36.4247	115.667	24.3806	87.4333	7.79947	124.833	15.5073	85.6667	20.8882	86.7	4.79599	1.16015	0.876964	0.686248	0.694526			59.7	108.8
FALSE	High	Master Protein	P48444	Coatomer subunit delta OS=Homo sapiens GN=ARCN1 PE=1 SV=1	0	61.889	27	13	54	13	1	511	57.2	6.21	9287.33	38.42	13	12	response to stimulus;transport	cytoplasm;cytosol;endoplasmic reticulum;Golgi;membrane	RNA binding	Pf00928	372	ENSG00000095139.13	ARCN1	11		miR-517 relationship with ARCN1 and USP1	0	121.267	2.77244	85.0667	13.3441	91.3667	9.61804	110.433	25.9158	111.2	26.5891	80.6333	17.317	0.701484	0.753436	1.00694	0.730154			123.5	117.4
FALSE	High	Master Protein	Q7Z6Z7	E3 ubiquitin-protein ligase HUWE1 OS=Homo sapiens GN=HUWE1 PE=1 SV=3	0	61.691	4	14	48	14	1	4374	481.6	5.22	8602.14	69.99	14	14	cell differentiation;cell organization and biogenesis;metabolic process;response to stimulus;transport	cytoplasm;cytosol;extracellular;membrane;nucleus;organelle lumen	catalytic activity;DNA binding;protein binding;RNA binding	Pf00632, Pf02825, Pf06012, Pf06025, Pf14377	10075	ENSG00000086758.15	HUWE1	X	Ubiquitin mediated proteolysis		0	134.4	7.20344	78.9333	4.40568	90.8667	7.97879	98.2667	20.9812	112.767	12.3771	84.8333	18.3339	0.587302	0.676091	1.14756	0.863297			138.8	123.3
FALSE	High	Master Protein	Q9NU22	Midasin OS=Homo sapiens GN=MDN1 PE=1 SV=2	0	61.417	3	18	50	18	1	5596	632.4	5.68	8117.27	64.53	16	18	cell organization and biogenesis;metabolic process	cytoplasm;cytoskeleton;cytosol;membrane;nucleus	catalytic activity;nucleotide binding;protein binding	Pf00004, Pf00092, Pf02367, Pf07726, Pf07728, Pf13401, Pf13671	23195	ENSG00000112159.11	MDN1	6	Ribosome biogenesis in eukaryotes		0	134.95	64.0261	106.7	59.026	135.85	59.2277	144.05	57.7526	131.3	57.7368	147.15	62.4555	0.790663	1.00667	0.911489	1.02152			97.6
FALSE	High	Master Protein	P46781	40S ribosomal protein S9 OS=Homo sapiens GN=RPS9 PE=1 SV=3	0	61.204	48	13	115	13	1	194	22.6	10.65	18535.2	109.11	13	13	cell organization and biogenesis;metabolic process;regulation of biological process;transport	cytoplasm;cytosol;membrane;nucleus;ribosome	protein binding;RNA binding;structural molecule activity;translation regulator activity	Pf00163, Pf01479	6203	ENSG00000274005.3; ENSG00000275323.3; ENSG00000277079.3; ENSG00000278081.3; ENSG00000277359.3; ENSG00000170889.13; ENSG00000274950.4; ENSG00000274626.3; ENSG00000278270.4; ENSG00000274646.4	RPS9	19; CHR_HSCHR19LRC_LRC_T_CTG3_1; CHR_HSCHR19LRC_LRC_J_CTG3_1; CHR_HSCHR19LRC_PGF2_CTG3_1; CHR_HSCHR19LRC_LRC_S_CTG3_1; CHR_HSCHR19LRC_LRC_I_CTG3_1; CHR_HSCHR19LRC_PGF1_CTG3_1; CHR_HSCHR19LRC_COX2_CTG3_1; CHR_HSCHR19_4_CTG3_1; CHR_HSCHR19LRC_COX1_CTG3_1	Ribosome	Cytoplasmic Ribosomal Proteins	0	63.5	59.484	73.6333	18.5498	122.867	19.3734	125.9	38.8067	64.7	13.2624	149.367	12.2684	1.15958	1.93491	0.5139	1.18639			25	100.5
FALSE	High	Master Protein	Q9BYD2	39S ribosomal protein L9, mitochondrial OS=Homo sapiens GN=MRPL9 PE=1 SV=2	0	61.178	36	12	61	12	1	267	30.2	10.08	11228.8	72.44	11	12	cell organization and biogenesis;metabolic process	membrane;mitochondrion;ribosome	protein binding;RNA binding;structural molecule activity	Pf01281	65005	ENSG00000143436.10	MRPL9	1	Ribosome		0	112	25.9302	86.7333	23.9811	85.0333	11.9261	139.9	30.5429	99.7667	9.03459	76.5667	11.5969	0.774405	0.759226	0.713128	0.547296			78.6	126.1
FALSE	High	Master Protein	O00571	ATP-dependent RNA helicase DDX3X OS=Homo sapiens GN=DDX3X PE=1 SV=3	0	61.144	22	15	52	15	1	662	73.2	7.18	8083.5	54.09	14	15	cell death;cell organization and biogenesis;defense response;metabolic process;regulation of biological process;response to stimulus;transport	cytoplasm;cytosol;extracellular;membrane;mitochondrion;nucleus;organelle lumen	catalytic activity;DNA binding;enzyme regulator activity;nucleotide binding;protein binding;RNA binding	Pf00270, Pf00271, Pf04851	1654	ENSG00000215301.9	DDX3X	X	Hepatitis B; RIG-I-like receptor signaling pathway; Viral carcinogenesis	RIG-I-like Receptor Signaling	0	135.767	12.7729	90.9	21.1396	90.1333	13.4334	89.6333	29.0414	115	13.8837	78.6333	12.9418	0.669531	0.663884	1.283	0.877278			154.4	120.1
FALSE	High	Master Protein	P52788	Spermine synthase OS=Homo sapiens GN=SMS PE=1 SV=2	0	60.849	39	12	63	12	1	366	41.2	5.02	10729	60.31	12	12	metabolic process	cytosol	catalytic activity	Pf01564	6611	ENSG00000102172.15	SMS	X	Arginine and proline metabolism; Metabolic pathways; Glutathione metabolism; Cysteine and methionine metabolism; beta-Alanine metabolism	Urea cycle and metabolism of amino groups; Amino Acid metabolism	0	101.367	13.9836	114.5	15.1681	69.8333	20.6733	132.867	19.5735	95.3333	31.958	86.0667	3.03058	1.12956	0.688918	0.717511	0.647767			96.2	90.5
FALSE	High	Master Protein	P67809	Nuclease-sensitive element-binding protein 1 OS=Homo sapiens GN=YBX1 PE=1 SV=3	0	60.706	34	8	46	4	1	324	35.9	9.88	7816.19	34.49	8	7	metabolic process;regulation of biological process	cytoplasm;cytosol;extracellular;membrane;nucleus;spliceosomal complex	DNA binding;protein binding;RNA binding	Pf00313	4904	ENSG00000065978.18	YBX1	1		Brain-Derived Neurotrophic Factor (BDNF) signaling pathway; mRNA Processing; Mecp2 and Associated Rett Syndrome; Sudden Infant Death Syndrome (SIDS) Susceptibility Pathways	4	65.3667	13.4088	137.933	11.3445	104.7	39.8295	62.7333	20.3148	111.333	17.6198	117.933	7.06048	2.11015	1.60173	1.77471	1.87991			75.4	59.2
FALSE	High	Master Protein	O43175	D-3-phosphoglycerate dehydrogenase OS=Homo sapiens GN=PHGDH PE=1 SV=4	0	60.702	28	14	70	14	1	533	56.6	6.71	10659.9	67.77	14	14	metabolic process	cytosol	catalytic activity;nucleotide binding	Pf00389, Pf02826	26227	ENSG00000092621.11	PHGDH	1	Carbon metabolism; Metabolic pathways; Glycine, serine and threonine metabolism; Biosynthesis of amino acids	Trans-sulfuration and one carbon metabolism	0	97.9333	12.1444	96.2667	21.0955	80.7667	9.78152	121	21.4437	111.133	13.4002	92.9	10.4607	0.982982	0.824711	0.918457	0.767769			100.4	85
FALSE	High	Master Protein	P13804	Electron transfer flavoprotein subunit alpha, mitochondrial OS=Homo sapiens GN=ETFA PE=1 SV=1	0	60.536	40	10	52	10	1	333	35.1	8.38	8747.28	59.98	10	10	metabolic process;transport	mitochondrion;organelle lumen	catalytic activity;nucleotide binding;protein binding	Pf00766, Pf01012	2108	ENSG00000140374.15	ETFA	15			0	124.933	26.6952	111.667	14.9411	75.6667	22.9364	118.2	15.8685	100.267	25.8795	69.2667	38.3204	0.89381	0.605656	0.84828	0.586012			159.3	92.7
FALSE	High	Master Protein	P54577	Tyrosine--tRNA ligase, cytoplasmic OS=Homo sapiens GN=YARS PE=1 SV=4	0	60.463	27	14	51	14	1	528	59.1	7.05	8028.91	58.5	14	14	cell death;metabolic process;regulation of biological process;response to stimulus	cytoplasm;cytosol	catalytic activity;nucleotide binding;protein binding;RNA binding;signal transducer activity	Pf00579, Pf01588	8565	ENSG00000134684.10	YARS	1	Aminoacyl-tRNA biosynthesis		0	111.667	14.7732	96.1	3.53798	82.0667	12.4208	113.167	14.831	108.933	1.79498	88.0667	8.31661	0.860597	0.734925	0.962592	0.778203			126.5	93.9
FALSE	High	Master Protein	Q9P015	39S ribosomal protein L15, mitochondrial OS=Homo sapiens GN=MRPL15 PE=1 SV=1	0	60.128	53	13	51	13	1	296	33.4	10.01	8314.3	48.67	13	13	cell organization and biogenesis;metabolic process	membrane;mitochondrion;ribosome	protein binding;RNA binding;structural molecule activity	Pf00828	29088	ENSG00000137547.8	MRPL15	8	Ribosome		0	106.367	44.1465	75.6333	42.1032	93.7333	25.0573	136.967	12.5638	108.933	13.3287	78.4	30.1552	0.711062	0.881228	0.795327	0.572402			52.7	126.5
FALSE	High	Master Protein	Q96D46	60S ribosomal export protein NMD3 OS=Homo sapiens GN=NMD3 PE=1 SV=1	0	60.096	30	15	53	15	1	503	57.6	7.14	8946.24	57.6	15	15	regulation of biological process;transport	cytoplasm;membrane;nucleus	protein binding;RNA binding	Pf04981	51068	ENSG00000169251.12	NMD3	3	Ribosome biogenesis in eukaryotes; RNA transport		0	126.833	18.1965	83.1	2.25451	84.5	25.0594	136.333	22.4936	96.6667	6.06152	72.5667	24.3057	0.655191	0.666229	0.709046	0.532274			106.1	122.7
FALSE	High	Master Protein	P36873-2	Isoform Gamma-2 of Serine/threonine-protein phosphatase PP1-gamma catalytic subunit OS=Homo sapiens GN=PPP1CC	0	59.946	28	9	46	1	1	337	38.5	6.13	8040.24	52.94	9	9	cell differentiation;cell division;cell organization and biogenesis;metabolic process;regulation of biological process;response to stimulus	cytoplasm;cytosol;membrane;mitochondrion;nucleus	catalytic activity;metal ion binding;protein binding;RNA binding	Pf00149	5501	ENSG00000186298.11	PPP1CC	12		Common Pathways Underlying Drug Addiction	0	374.5	57.735	474.4	57.735	376.2	57.735	381.8	57.735	415.7	57.735	377.5	57.735	1.26676	1.00454	1.08879	0.988738				374.5
FALSE	High	Master Protein	O95831	Apoptosis-inducing factor 1, mitochondrial OS=Homo sapiens GN=AIFM1 PE=1 SV=1	0	59.821	18	8	40	8	1	613	66.9	8.95	7011.24	49.48	8	8	cell death;cell differentiation;cell organization and biogenesis;cellular homeostasis;metabolic process;regulation of biological process;response to stimulus	cytoplasm;cytosol;membrane;mitochondrion;nucleus	catalytic activity;DNA binding;nucleotide binding;protein binding	Pf00070, Pf07992, Pf14721, Pf14962	9131	ENSG00000156709.13	AIFM1	X	Apoptosis	Nanomaterial induced apoptosis; Apoptosis Modulation by HSP70; Apoptosis Modulation and Signaling	0	114.033	19.7866	91.9333	8.74694	95.1333	19.0791	85.4	31.3146	120.467	3.35175	93.0333	4.69188	0.806197	0.834259	1.41062	1.08938			139	95.1
FALSE	High	Master Protein	Q99848	Probable rRNA-processing protein EBP2 OS=Homo sapiens GN=EBNA1BP2 PE=1 SV=2	0	59.779	37	12	51	12	1	306	34.8	10.1	10151.5	60.08	12	11	metabolic process	nucleus	protein binding;RNA binding	Pf05890	10969	ENSG00000117395.12	EBNA1BP2	1			0	52.7667	34.6672	128.767	18.0815	125.667	36.1563	55.2333	55.4073	128.8	13.3425	108.733	15.1416	2.4403	2.38155	2.33193	1.96862			33.3	55.4
FALSE	High	Master Protein	Q09028	Histone-binding protein RBBP4 OS=Homo sapiens GN=RBBP4 PE=1 SV=3	0	59.61	32	14	52	5	1	425	47.6	4.89	9125.72	56	14	14	cell organization and biogenesis;metabolic process;regulation of biological process;response to stimulus	cytosol;nucleus	catalytic activity;DNA binding;protein binding	Pf00400, Pf12265	5928	ENSG00000162521.18	RBBP4	1		Retinoblastoma (RB) in Cancer; Interactome of polycomb repressive complex 2 (PRC2)	0	109.933	11.5554	93.8667	5.87614	99.4667	20.2049	92.7	20.1593	109.4	7.42149	94.6333	11.3857	0.853851	0.904791	1.18015	1.02086			114.4	95.6
FALSE	High	Master Protein	P08133	Annexin A6 OS=Homo sapiens GN=ANXA6 PE=1 SV=3	0	59.453	23	14	55	14	1	673	75.8	5.6	9045.82	58.05	14	14	cell organization and biogenesis;cellular homeostasis;regulation of biological process;response to stimulus;transport	cytoplasm;membrane;mitochondrion	metal ion binding;nucleotide binding;protein binding;transporter activity	Pf00191	309	ENSG00000197043.13	ANXA6	5		Prostaglandin Synthesis and Regulation; Calcium Regulation in the Cardiac Cell	0	82.7667	32.587	108.9	27.8411	75.8	22.6464	138.767	13.2036	104.933	26.2148	88.8667	8.36224	1.31575	0.915828	0.756185	0.640404			55.2	84
FALSE	High	Master Protein	P51659	Peroxisomal multifunctional enzyme type 2 OS=Homo sapiens GN=HSD17B4 PE=1 SV=3	0	59.389	21	11	37	11	1	736	79.6	8.84	6427.67	48.5	11	11	cell differentiation;metabolic process	membrane;mitochondrion;organelle lumen	catalytic activity;protein binding	Pf00106, Pf01575, Pf02036, Pf08659, Pf13452, Pf13561, Pf14864	3295	ENSG00000133835.14	HSD17B4	5	Peroxisome; Primary bile acid biosynthesis; Metabolic pathways	Steroid Biosynthesis	0	115.467	32.9038	95.6	13.347	84.9667	8.50111	95.7	2.73285	110.8	3.49198	97.4667	25.8286	0.827945	0.735855	1.15778	1.01846			158.9	99.1
FALSE	High	Master Protein	P63279	SUMO-conjugating enzyme UBC9 OS=Homo sapiens GN=UBE2I PE=1 SV=1	0	59.062	35	9	54	9	1	158	18	8.66	9279.09	80.16	9	9	cell division;metabolic process;regulation of biological process;response to stimulus	cytoplasm;cytosol;nucleus	catalytic activity;nucleotide binding;protein binding;RNA binding	Pf00179, Pf14461	7329	ENSG00000103275.19	UBE2I	16	RNA transport; Ubiquitin mediated proteolysis; NF-kappa B signaling pathway; MicroRNAs in cancer	TGF-beta Signaling Pathway; Androgen receptor signaling pathway	0	133.8	27.3544	106.933	17.2256	71.7333	7.79216	130	12.4746	95.8667	5.63121	61.6333	11.2765	0.799203	0.536124	0.737436	0.474103			166.2	94.1
FALSE	High	Master Protein	P52209	6-phosphogluconate dehydrogenase, decarboxylating OS=Homo sapiens GN=PGD PE=1 SV=3	0	59.042	28	10	35	10	1	483	53.1	7.23	6304.51	40.16	10	10	metabolic process	cytoplasm;cytosol;nucleus	catalytic activity	Pf00393, Pf03446	5226	ENSG00000142657.20	PGD	1	Pentose phosphate pathway; Carbon metabolism; Metabolic pathways; Glutathione metabolism	Pentose Phosphate Pathway; NRF2 pathway	0	127.533	23.6843	97	5.44833	78.1667	23.0712	108.933	20.5262	110.7	15.4022	77.6667	12.307	0.760585	0.612912	1.01622	0.712974			160.3	100.8
FALSE	High	Master Protein	Q14697-2	Isoform 2 of Neutral alpha-glucosidase AB OS=Homo sapiens GN=GANAB	0	59.016	19	14	48	14	1	966	109.4	6.24	9064.67	63.33	13	13	metabolic process	Golgi;membrane;organelle lumen	catalytic activity;RNA binding	Pf01055, Pf13802	23193	ENSG00000089597.16	GANAB	11			0	130.833	16.534	94.2333	16.9985	78.5667	17.2324	105.5	13.8418	105.433	27.8769	85.4667	14.5807	0.720255	0.60051	0.999368	0.810111			142	105.9
FALSE	High	Master Protein	Q14839-2	Isoform 2 of Chromodomain-helicase-DNA-binding protein 4 OS=Homo sapiens GN=CHD4	0	58.856	9	15	40	11	1	1940	220.7	5.97	6314.95	33.1	15	15	cell organization and biogenesis;metabolic process;regulation of biological process	cytoplasm;membrane;nucleus	catalytic activity;DNA binding;metal ion binding;nucleotide binding;protein binding	Pf00176, Pf00271, Pf00385, Pf00628, Pf04851, Pf06461, Pf06465, Pf08073, Pf08074, Pf13831	1108		CHD4	12			5	103.467	11.7985	100.833	16.4749	92.6	10.953	105.367	16.4548	106.4	22.0342	91.3667	5.08948	0.974549	0.894974	1.00981	0.867131			97.6	95.3
FALSE	High	Master Protein	P04181	Ornithine aminotransferase, mitochondrial OS=Homo sapiens GN=OAT PE=1 SV=1	0	58.805	31	10	45	10	1	439	48.5	7.03	8797.43	52.22	10	9	cell organization and biogenesis;metabolic process	cytoplasm;mitochondrion;organelle lumen	catalytic activity;protein binding	Pf00202	4942	ENSG00000065154.11	OAT	10	Arginine and proline metabolism; Metabolic pathways	Urea cycle and metabolism of amino groups; Amino Acid metabolism	0	101.733	19.6606	117.833	8.09804	77.9	8.74046	125.2	18.6167	96.6333	18.9831	80.6333	4.98753	1.15826	0.765727	0.771832	0.644036			81.6	102
FALSE	High	Master Protein	P25787	Proteasome subunit alpha type-2 OS=Homo sapiens GN=PSMA2 PE=1 SV=2	0	58.622	52	9	55	9	1	234	25.9	7.43	10972.8	68.87	9	9	metabolic process;regulation of biological process;response to stimulus;transport	cytoplasm;cytosol;extracellular;nucleus;organelle lumen;proteasome	catalytic activity;protein binding	Pf00227, Pf10584	5683	ENSG00000256646.7; ENSG00000106588.10	PSMA2	7	Proteasome	Proteasome Degradation	0	114.2	18.5738	87.2667	4.07135	88.6	11.1144	114.633	12.4771	97.5	5.98837	97.7667	9.47571	0.764156	0.775832	0.850538	0.852864			92.6	115
FALSE	High	Master Protein	P61513	60S ribosomal protein L37a OS=Homo sapiens GN=RPL37A PE=1 SV=2	0	58.589	59	6	86	6	1	92	10.3	10.43	14580.5	91.45	6	6	cell organization and biogenesis;metabolic process;transport	cytosol;nucleus;ribosome	metal ion binding;protein binding;RNA binding;structural molecule activity	Pf01780	6168	ENSG00000197756.9	RPL37A	2	Ribosome	Cytoplasmic Ribosomal Proteins	0	49.3667	30.1451	76.7333	14.5379	143.4	8.68838	71.4667	28.2501	101.733	20.8055	157.3	4.6807	1.55436	2.90479	1.42351	2.20103			36.8	45.5
FALSE	High	Master Protein	P41091	Eukaryotic translation initiation factor 2 subunit 3 OS=Homo sapiens GN=EIF2S3 PE=1 SV=3	0	58.58	26	11	53	11	1	472	51.1	8.4	8638.68	53.33	11	10	metabolic process;transport	cytoplasm;cytosol;nucleus	catalytic activity;nucleotide binding;protein binding;RNA binding	Pf00009, Pf03144, Pf09173	1968	ENSG00000130741.10	EIF2S3	X	RNA transport	Translation Factors	0	103.433	10.992	96.0333	23.6751	84.8333	14.1495	118.5	21.7055	101.067	17.2224	96.0667	18.7671	0.928456	0.820174	0.852883	0.810689			91.7	104.2
FALSE	High	Master Protein	Q16891	MICOS complex subunit MIC60 OS=Homo sapiens GN=IMMT PE=1 SV=1	0	58.428	33	17	42	17	1	758	83.6	6.48	6188.19	38.88	16	16	cell organization and biogenesis;cellular homeostasis	membrane;mitochondrion	protein binding;RNA binding	Pf09731	10989	ENSG00000132305.20	IMMT	2			0	91.1333	31.2608	76.3333	9.33201	79.0333	12.0118	157.533	35.5095	105.1	17.6431	90.8333	7.41493	0.837601	0.867228	0.66716	0.576598			59	113.3
FALSE	High	Master Protein	O00303	Eukaryotic translation initiation factor 3 subunit F OS=Homo sapiens GN=EIF3F PE=1 SV=1	0	58.033	19	6	66	6	1	357	37.5	5.45	11572.6	81.13	6	6	metabolic process	cytoplasm;cytosol;membrane	catalytic activity;protein binding;RNA binding	Pf01398, Pf13012	8665	ENSG00000280606.3; ENSG00000175390.13	EIF3F	11; CHR_HSCHR11_1_CTG1_2	RNA transport	Translation Factors	0	121	13.1742	111	27.4425	82.2	9.63762	118.367	11.783	83	21.0209	84.4333	4.68137	0.917355	0.679339	0.701211	0.71332			103.6	124.5
FALSE	High	Master Protein	Q9UHX1	Poly(U)-binding-splicing factor PUF60 OS=Homo sapiens GN=PUF60 PE=1 SV=1	0	58.021	20	10	56	10	1	559	59.8	5.29	9794.98	75.25	10	10	cell death;cellular homeostasis;metabolic process;regulation of biological process	nucleus	catalytic activity;DNA binding;protein binding;RNA binding	Pf00076, Pf13893, Pf14259	22827	ENSG00000274081.4; ENSG00000179950.13	PUF60	8; CHR_HSCHR8_3_CTG7	Spliceosome		0	121.733	27.5294	99.5333	14.8199	84.0667	9.62002	97.5	6.36641	112.267	7.07131	84.9	9.53482	0.817634	0.690581	1.15145	0.870769			157.4	90.9
FALSE	High	Master Protein	Q05639	Elongation factor 1-alpha 2 OS=Homo sapiens GN=EEF1A2 PE=1 SV=1	0	58.012	25	9	89	1	1	463	50.4	9.03	15122.6	103.86	9	9	metabolic process;regulation of biological process;response to stimulus	cytoplasm;nucleus	catalytic activity;nucleotide binding;protein binding;RNA binding	Pf00009, Pf03143, Pf03144	1917	ENSG00000101210.10	EEF1A2	20	Legionellosis; RNA transport	Translation Factors	0	323.2	57.735	38.1	57.735	138.5	57.735	348.2	57.735	312.6	57.735	39.4	57.735	0.117884	0.428527	0.89776	0.113153
FALSE	High	Master Protein	Q93008	Probable ubiquitin carboxyl-terminal hydrolase FAF-X OS=Homo sapiens GN=USP9X PE=1 SV=3	0	57.859	6	17	52	17	1	2570	292.1	5.8	8555.96	60.64	17	17	cell division;cell growth;cellular component movement;metabolic process;regulation of biological process;response to stimulus	cytoplasm;cytosol;membrane	catalytic activity;protein binding	Pf00443, Pf09606, Pf13423	8239	ENSG00000124486.12	USP9X	X			0	102.967	30.6478	74.6333	15.9059	95.7333	8.50816	106.8	34.05	134.167	40.8041	85.7667	9.00833	0.72483	0.929751	1.25624	0.803059			110.9	68.2
FALSE	High	Master Protein	P46783	40S ribosomal protein S10 OS=Homo sapiens GN=RPS10 PE=1 SV=1	0	57.855	64	13	100	12	1	165	18.9	10.15	16091.3	91.42	13	13	cell organization and biogenesis;metabolic process;transport	cytoplasm;cytosol;membrane;nucleus;ribosome	protein binding;RNA binding;structural molecule activity	Pf03501	6204	ENSG00000124614.13	RPS10	6	Ribosome	Cytoplasmic Ribosomal Proteins	1	73.4	8.88279	83.4667	17.4008	127.4	7.19442	94.2667	15.1673	83.9333	9.53237	137.6	8.92949	1.13715	1.73569	0.890382	1.45969			68.5	80.8
FALSE	High	Master Protein	P16989	Y-box-binding protein 3 OS=Homo sapiens GN=YBX3 PE=1 SV=4	0	57.808	37	8	44	4	1	372	40.1	9.77	7559.41	33.9	8	7	metabolic process;regulation of biological process;response to stimulus	cytoplasm;cytosol;nucleus	DNA binding;protein binding;RNA binding	Pf00313	8531	ENSG00000060138.12	CSDA; YBX3	12	Tight junction	RalA downstream regulated genes; Apoptosis-related network due to altered Notch3 in ovarian cancer	0	382.9	57.735	517.3	57.735	509.8	57.735	278.3	57.735	410.9	57.735	300.8	57.735	1.35101	1.33142	1.47646	1.08085				382.9
FALSE	High	Master Protein	P17812	CTP synthase 1 OS=Homo sapiens GN=CTPS1 PE=1 SV=2	0	57.745	17	9	42	9	1	591	66.6	6.46	7439.69	57.3	9	9	cell proliferation;metabolic process;response to stimulus	cytosol;membrane	catalytic activity;nucleotide binding;protein binding	Pf00117, Pf06418, Pf07722	1503	ENSG00000171793.13	CTPS1	1	Pyrimidine metabolism; Metabolic pathways		0	113	20.6673	99.8667	3.11113	81.6333	3.10223	125.833	37.6979	97.3333	28.4506	82.3333	3.08782	0.883776	0.722419	0.77351	0.654305			89.4	113.5
FALSE	High	Master Protein	Q13642-4	Isoform 4 of Four and a half LIM domains protein 1 OS=Homo sapiens GN=FHL1	0	57.723	41	11	48	5	1	309	35	8.32	8377.43	61.34	11	11	cell differentiation;regulation of biological process	cytoplasm;cytosol;membrane;nucleus	metal ion binding;protein binding	Pf00412	2273	ENSG00000022267.16	FHL1	X		Notch Signaling Pathway	6	97.5333	3.89655	107.4	7.47609	81.2	24.8778	103.467	13.7916	130.267	5.56025	80.1667	10.8146	1.10116	0.832536	1.25902	0.774807			100.3	93.2
FALSE	High	Master Protein	P50570	Dynamin-2 OS=Homo sapiens GN=DNM2 PE=1 SV=2	0	57.668	12	11	38	11	1	870	98	7.44	5633.27	44.95	10	11	cell organization and biogenesis;metabolic process;regulation of biological process;response to stimulus;transport	cytoplasm;cytoskeleton;cytosol;endosome;Golgi;membrane;nucleus	catalytic activity;nucleotide binding;protein binding	Pf00169, Pf00350, Pf01031, Pf02212	1785	ENSG00000079805.16	DNM2	19	Fc gamma R-mediated phagocytosis; Endocrine and other factor-regulated calcium reabsorption; Endocytosis; Synaptic vesicle cycle; Bacterial invasion of epithelial cells; Phospholipase D signaling pathway	Synaptic Vesicle Pathway	0	98.7	14.3495	89.2667	22.4289	94.4333	12.6562	120.933	5.37952	100.267	23.38	96.4	14.9834	0.904424	0.956771	0.829107	0.797133			91.7	89.4
FALSE	High	Master Protein	Q07020	60S ribosomal protein L18 OS=Homo sapiens GN=RPL18 PE=1 SV=2	0	57.462	39	7	92	7	1	188	21.6	11.72	16199	97.05	7	7	cell organization and biogenesis;metabolic process;transport	cytoplasm;cytosol;endoplasmic reticulum;membrane;nucleus;ribosome	RNA binding;structural molecule activity	Pf00828	6141	ENSG00000063177.12	RPL18	19	Ribosome	Cytoplasmic Ribosomal Proteins	0	49.1667	57.216	98.5	24.9798	131.267	10.7113	67.8667	11.3375	91.2	9.47117	162.033	22.5691	2.00339	2.66983	1.34381	2.38752			19.6	75.6
FALSE	High	Master Protein	P62820	Ras-related protein Rab-1A OS=Homo sapiens GN=RAB1A PE=1 SV=3	0	57.326	61	12	68	5	1	205	22.7	6.21	11435.3	84.95	11	12	cell organization and biogenesis;cellular component movement;defense response;metabolic process;regulation of biological process;response to stimulus;transport	cytoplasm;cytosol;endoplasmic reticulum;endosome;Golgi;membrane	catalytic activity;nucleotide binding;protein binding	Pf00009, Pf00025, Pf00071, Pf01926, Pf04670, Pf08477, Pf09439	5861	ENSG00000138069.16	RAB1A	2	Legionellosis		0	132.433	21.1794	113	19.042	86.3333	16.7695	105.233	25.5561	92.9	15.6015	70.0667	18.0588	0.85326	0.6519	0.8828	0.665822			154.6	100.9
FALSE	High	Master Protein	Q8N766	ER membrane protein complex subunit 1 OS=Homo sapiens GN=EMC1 PE=1 SV=1	0	57.298	12	10	32	10	1	993	111.7	7.66	6013.49	45.91	10	10	metabolic process	endoplasmic reticulum;membrane		Pf07774, Pf13360	23065	ENSG00000127463.13	EMC1	1			0	96.1	39.6762	87.9667	31.7011	98.2333	8.38546	84.7667	18.0978	120.533	44.6005	112.433	31.0734	0.915366	1.0222	1.42194	1.32639			79.6	69
FALSE	High	Master Protein	P49411	Elongation factor Tu, mitochondrial OS=Homo sapiens GN=TUFM PE=1 SV=2	0	57.294	29	12	56	12	1	452	49.5	7.61	9944.58	68.34	12	11	metabolic process;response to stimulus	membrane;mitochondrion	catalytic activity;nucleotide binding;protein binding;RNA binding	Pf00009, Pf03143, Pf03144	7284		TUFM	16			0	94.2667	15.9795	112.033	12.4517	82.1667	16.1872	112.833	20.3502	104.9	11.3729	93.8667	14.7781	1.18847	0.871641	0.92969	0.831905			82.7	88.8
FALSE	High	Master Protein	P27694	Replication protein A 70 kDa DNA-binding subunit OS=Homo sapiens GN=RPA1 PE=1 SV=2	0	57.14	20	11	39	11	1	616	68.1	7.21	6911.67	45.59	11	10	cell organization and biogenesis;cellular homeostasis;metabolic process;regulation of biological process;response to stimulus	nucleus	DNA binding;metal ion binding;protein binding	Pf01336, Pf01485, Pf04057, Pf08646	6117	ENSG00000132383.11	RPA1	17	DNA replication; Mismatch repair; Nucleotide excision repair; Fanconi anemia pathway; Homologous recombination	DNA Replication; ATR Signaling; Homologous recombination; Retinoblastoma (RB) in Cancer; G1 to S cell cycle control; Mismatch repair	0	94.9333	25.5038	104.267	20.0634	95.9667	2.50159	95.9667	14.3491	116.8	7.63236	92.1333	4.1887	1.09831	1.01088	1.21709	0.960056			67	109.9
FALSE	High	Master Protein	P22307	Non-specific lipid-transfer protein OS=Homo sapiens GN=SCP2 PE=1 SV=2	0	57.007	20	11	62	11	1	547	59	6.89	10466	74.4	11	10	cell organization and biogenesis;metabolic process;regulation of biological process;transport	cytoplasm;membrane;mitochondrion;organelle lumen	catalytic activity;protein binding;transporter activity	Pf00108, Pf00109, Pf02036, Pf02801, Pf02803, Pf08545, Pf14864	6342	ENSG00000116171.17	SCP2	1	Primary bile acid biosynthesis; PPAR signaling pathway; Metabolic pathways; Peroxisome	PPAR signaling pathway; DNA Damage Response (only ATM dependent); PPAR Alpha Pathway; Mitochondrial LC-Fatty Acid Beta-Oxidation	0	165	29.6263	102.1	35.3412	63.8	28.8337	124.933	8.23714	96.1	32.3501	48	40.7887	0.618788	0.386667	0.76921	0.384205			205.5	110.7
FALSE	High	Master Protein	Q9UHD1	Cysteine and histidine-rich domain-containing protein 1 OS=Homo sapiens GN=CHORDC1 PE=1 SV=2	0	56.872	43	11	43	11	1	332	37.5	7.87	7567.05	54.99	10	11	metabolic process;regulation of biological process		metal ion binding;nucleotide binding;protein binding	Pf04968, Pf04969	26973	ENSG00000110172.11	CHORDC1	11			0	101.4	14.4742	95.8667	17.4267	81.7667	18.0412	121.767	12.6248	108.033	18.3044	91.1667	17.2632	0.945431	0.806377	0.887216	0.7487			85	105.9
FALSE	High	Master Protein	P26373	60S ribosomal protein L13 OS=Homo sapiens GN=RPL13 PE=1 SV=4	0	56.538	43	11	63	11	1	211	24.2	11.65	10338.5	55.05	11	10	cell organization and biogenesis;metabolic process;transport	cytosol;membrane;nucleus;ribosome	protein binding;RNA binding;structural molecule activity	Pf01294	6137	ENSG00000167526.13	RPL13	16	Ribosome	Cytoplasmic Ribosomal Proteins	0	44.1667	55.2631	88.2	36.4142	138.867	21.1567	62.1333	30.6662	103	16.6269	163.7	17.5123	1.99698	3.14415	1.65773	2.63466			16	57.4
FALSE	High	Master Protein	P07339	Cathepsin D OS=Homo sapiens GN=CTSD PE=1 SV=1	0	56.313	26	9	47	9	1	412	44.5	6.54	7720.49	58.23	9	9	metabolic process;transport	extracellular;membrane;organelle lumen;vacuole	catalytic activity;protein binding	Pf00026, Pf07966, Pf14541, Pf14543	1509	ENSG00000117984.13	CTSD	11	Tuberculosis; Apoptosis; Sphingolipid signaling pathway; Lysosome	Prolactin Signaling Pathway	0	115.767	1.48196	106.6	8.18289	95.1333	14.2125	102.1	22.8516	100.333	23.0735	79.9667	8.44295	0.920818	0.821768	0.982697	0.783219			117.6	115.5
FALSE	High	Master Protein	P37837	Transaldolase OS=Homo sapiens GN=TALDO1 PE=1 SV=2	0	56.147	32	12	74	12	1	337	37.5	6.81	12245.6	87.22	11	11	metabolic process;regulation of biological process;response to stimulus	cytoplasm;cytosol;nucleus	catalytic activity;protein binding	Pf00923	6888	ENSG00000177156.10	TALDO1	11	Metabolic pathways; Carbon metabolism; Biosynthesis of amino acids; Pentose phosphate pathway	Cori Cycle; Pentose Phosphate Pathway	0	102.433	18.3374	128.167	19.5305	77.4333	6.65349	120.967	4.46276	92.5	17.6614	78.5	5.60075	1.25122	0.755939	0.764673	0.648939			86.4	97.8
FALSE	High	Master Protein	Q9ULC4-3	Isoform 3 of Malignant T-cell-amplified sequence 1 OS=Homo sapiens GN=MCTS1	0	55.691	54	7	27	7	1	182	20.5	8.82	5822.83	44.02	7	7	cell organization and biogenesis;metabolic process;regulation of biological process;response to stimulus	cytosol;membrane	protein binding;RNA binding	Pf01472	28985	ENSG00000232119.7	MCTS1	X			0	130.933	34.9306	91.3333	38.4558	85.8	20.269	124.367	22.7888	95.5333	34.7733	72.0333	22.646	0.697556	0.655295	0.768159	0.579201			127.7	86.9
FALSE	High	Master Protein	P61011	Signal recognition particle 54 kDa protein OS=Homo sapiens GN=SRP54 PE=1 SV=1	0	55.519	31	12	34	12	1	504	55.7	8.75	5128.84	41.47	11	12	cell organization and biogenesis;metabolic process;response to stimulus;transport	cytoplasm;cytosol;nucleus	catalytic activity;nucleotide binding;protein binding;RNA binding	Pf00448, Pf01656, Pf02881, Pf02978, Pf03205, Pf09974, Pf13207, Pf13671	6729	ENSG00000100883.11	SRP54	14	Protein export	mRNA Processing	0	110.967	30.4258	85.2667	14.1404	106.1	17.9148	102.833	12.278	126.233	18.7502	68.6	20.3785	0.768399	0.956143	1.22755	0.667099			148	81.9
FALSE	High	Master Protein	P26583	High mobility group protein B2 OS=Homo sapiens GN=HMGB2 PE=1 SV=2	0	55.407	36	11	54	10	1	209	24	7.81	9000.37	75.5	10	10	cell organization and biogenesis;cellular component movement;defense response;metabolic process;regulation of biological process;response to stimulus	chromosome;cytoplasm;extracellular;nucleus	DNA binding;protein binding;RNA binding	Pf00505, Pf09011	3148	ENSG00000164104.11	HMGB2	4		Ectoderm Differentiation; Retinoblastoma (RB) in Cancer	0	123.933	25.241	126.367	22.8126	90.9667	5.83805	100.6	20.6398	103.833	23.0032	54.3	40.761	1.01963	0.733997	1.03214	0.539761			158	96.5
FALSE	High	Master Protein	P26368	Splicing factor U2AF 65 kDa subunit OS=Homo sapiens GN=U2AF2 PE=1 SV=4	0	55.351	34	10	43	10	1	475	53.5	9.09	6217.19	28.58	10	10	metabolic process;regulation of biological process;transport	nucleus;spliceosomal complex	protein binding;RNA binding	Pf00076, Pf13893, Pf14259	11338	ENSG00000063244.12	U2AF2	19	Spliceosome	mRNA Processing	0	101.867	19.7766	112.133	17.9728	76.4333	22.7861	128.767	17.1638	89.9333	31.2322	90.9	7.86175	1.10079	0.750327	0.698421	0.705928			84.6	97
FALSE	High	Master Protein	Q9NYK5-2	Isoform 2 of 39S ribosomal protein L39, mitochondrial OS=Homo sapiens GN=MRPL39	0	55.297	36	11	46	11	1	353	40.4	7.91	6753.36	44.22	11	11	cell organization and biogenesis;metabolic process	membrane;ribosome	nucleotide binding;RNA binding	Pf02824	54148	ENSG00000154719.13	MRPL39	21			0	130.667	19.1654	94.2	22.2629	86.7	24.6332	115.667	6.68022	113.067	21.7129	59.7333	19.6843	0.720918	0.66352	0.977522	0.516427			101.9	142.5
FALSE	High	Master Protein	P60981	Destrin OS=Homo sapiens GN=DSTN PE=1 SV=3	0	55.171	45	10	88	6	1	165	18.5	7.85	13696.2	78.12	10	10	cell organization and biogenesis;regulation of biological process	cytoplasm;cytoskeleton	protein binding	Pf00241	11034	ENSG00000125868.15	DSTN	20		Androgen receptor signaling pathway	0	149.75	60.1656	116.45	58.079	96.55	58.0853	153.75	57.8519	150.8	57.7405	132.75	59.4376	0.777629	0.644741	0.980813	0.863415			124.4
FALSE	High	Master Protein	Q5SY16	Polynucleotide 5'-hydroxyl-kinase NOL9 OS=Homo sapiens GN=NOL9 PE=1 SV=1	0	54.927	22	10	35	10	1	702	79.3	9.13	6163.72	45.14	10	10	metabolic process	cytoskeleton;membrane;nucleus	catalytic activity;enzyme regulator activity;nucleotide binding;protein binding;RNA binding	Pf03205, Pf06807	79707	ENSG00000162408.10	NOL9	1			0	96.9	52.6566	77	31.5785	93.4	36.0671	138.267	31.2026	100	17.6604	94.4667	28.2059	0.794634	0.96388	0.72324	0.683221			43.1	103
FALSE	High	Master Protein	P55145	Mesencephalic astrocyte-derived neurotrophic factor OS=Homo sapiens GN=MANF PE=1 SV=3	0	54.905	41	10	49	10	1	182	20.7	8.69	7448.75	56	9	10	cell differentiation;cell organization and biogenesis;regulation of biological process;response to stimulus;transport	cytosol;endoplasmic reticulum;extracellular;nucleus	protein binding;RNA binding	Pf10208	7873		MANF	3			0	126.067	9.87129	126.967	25.9077	71.5667	31.3787	105.033	38.8675	102.9	11.2781	67.4333	11.8796	1.00714	0.567689	0.979689	0.642018			133.5	111.7
FALSE	High	Master Protein	P23921	Ribonucleoside-diphosphate reductase large subunit OS=Homo sapiens GN=RRM1 PE=1 SV=1	0	54.879	18	12	48	12	1	792	90	7.15	7831.37	55.87	12	12	metabolic process	cytoplasm;cytosol	catalytic activity;nucleotide binding;protein binding	Pf00317, Pf02867, Pf03477	6240	ENSG00000167325.14	RRM1	11	Glutathione metabolism; Metabolic pathways; Pyrimidine metabolism; Purine metabolism	Fluoropyrimidine Activity; Retinoblastoma (RB) in Cancer; Nucleotide Metabolism	0	104.633	14.7659	117.667	6.16387	84.7667	6.96561	107.733	14.4901	99.9667	10.95	85.2	7.6255	1.12456	0.810131	0.927908	0.790842			89.2	104.6
FALSE	High	Master Protein	Q9UBT2	SUMO-activating enzyme subunit 2 OS=Homo sapiens GN=UBA2 PE=1 SV=2	0	54.873	27	11	43	11	1	640	71.2	5.29	8020.58	53.88	11	10	metabolic process;regulation of biological process	cytoplasm;nucleus	catalytic activity;enzyme regulator activity;metal ion binding;nucleotide binding;protein binding	Pf00899, Pf02134, Pf10585, Pf14732	10054	ENSG00000126261.12	UBA2	19	Ubiquitin mediated proteolysis		0	103.767	22.4301	95.5	13.0903	101.733	3.60539	84.7	22.1542	127.7	24.151	86.5	19.8289	0.920334	0.980405	1.50767	1.02125			116.6	76.9
FALSE	High	Master Protein	Q15021	Condensin complex subunit 1 OS=Homo sapiens GN=NCAPD2 PE=1 SV=3	0	54.773	12	15	37	15	1	1401	157.1	6.61	5937.6	46.38	14	15	cell division;cell organization and biogenesis;metabolic process	chromosome;cytoplasm;cytosol;membrane;nucleus	protein binding	Pf12717, Pf12922	9918	ENSG00000010292.12	NCAPD2	12			0	100.733	45.6015	85.5333	25.5766	92	11.956	115.6	35.0875	103.867	23.8724	102.167	8.99709	0.849107	0.913302	0.898501	0.883795			50.5	111.1
FALSE	High	Master Protein	P46087-4	Isoform 4 of Probable 28S rRNA (cytosine(4447)-C(5))-methyltransferase OS=Homo sapiens GN=NOP2	0	54.505	14	11	46	1	1	845	92.8	9.19	7318.79	50.01	11	11	cell organization and biogenesis;metabolic process;regulation of biological process		catalytic activity;protein binding;RNA binding	Pf01189, Pf12847, Pf13900	4839	ENSG00000111641.11	NOP2	12		Imatinib and Chronic Myeloid Leukemia	10	63.5	22.658	86.2	62.8613	97.0333	27.4298	68.0667	66.9132	201.6	53.9483	83.6333	23.6933	1.35748	1.52808	2.9618	1.2287			47.4	68
FALSE	High	Master Protein	Q9HB71	Calcyclin-binding protein OS=Homo sapiens GN=CACYBP PE=1 SV=2	0	54.492	42	9	48	9	1	228	26.2	8.25	8662.23	55.7	9	9	cell differentiation;regulation of biological process;response to stimulus	cytoplasm;cytosol;nucleus	protein binding	Pf04969, Pf05002, Pf09032	27101	ENSG00000116161.17	CACYBP	1	Wnt signaling pathway	Gastric cancer network 2	0	104.733	17.0069	118.967	26.1796	74.1333	22.0404	128.1	10.386	96.8	16.8198	77.2333	13.838	1.1359	0.707829	0.75566	0.602914			85.7	107.5
FALSE	High	Master Protein	P55084	Trifunctional enzyme subunit beta, mitochondrial OS=Homo sapiens GN=HADHB PE=1 SV=3	0	54.406	25	13	53	13	1	474	51.3	9.41	7648.94	54.13	13	13	metabolic process	endoplasmic reticulum;membrane;mitochondrion	catalytic activity;protein binding;RNA binding	Pf00108, Pf00109, Pf02803	3032	ENSG00000138029.13	HADHB	2	Valine, leucine and isoleucine degradation; Fatty acid elongation; Fatty acid metabolism; Metabolic pathways; Fatty acid degradation	Valproic acid pathway; Fatty Acid Beta Oxidation; Sudden Infant Death Syndrome (SIDS) Susceptibility Pathways	0	118.733	28.3183	100.2	6.79523	88.8	8.1991	112.5	17.0015	96.5667	15.6353	83.2	11.2475	0.843908	0.747894	0.85837	0.739556			94.4	104.7
FALSE	High	Master Protein	P60028	Rab GDP dissociation inhibitor alpha OS=Pan troglodytes GN=GDI1 PE=2 SV=1	0	54.341	26	9	51	4	1	447	50.6	5.14	8160.84	48.46	9	9	metabolic process;regulation of biological process;response to stimulus;transport	cytoplasm;Golgi	catalytic activity;enzyme regulator activity	Pf00996	450155	ENSPTRG00000028169.3	GDI1	X			0	138.65	60.8505	84.65	88.4748	112	59.0352	161.2	58.3482	183.5	59.2221	120.05	57.9546	0.61053	0.807789	1.13834	0.744727				112
FALSE	High	Master Protein	P28331-2	Isoform 2 of NADH-ubiquinone oxidoreductase 75 kDa subunit, mitochondrial OS=Homo sapiens GN=NDUFS1	0	54.322	18	9	32	9	1	741	80.9	6.64	5813.4	43.86	9	9	cell organization and biogenesis;metabolic process	mitochondrion;organelle lumen	catalytic activity;metal ion binding;protein binding	Pf00111, Pf00384, Pf09326, Pf10588, Pf13510	4719	ENSG00000283447.1; ENSG00000023228.13	NDUFS1	2; CHR_HSCHR2_6_CTG7_2		Oxidative phosphorylation; Electron Transport Chain	0	89.7333	27.7402	79.4667	7.56116	103.9	8.72186	132.433	19.659	111.467	7.72591	83	24.6847	0.885587	1.15788	0.841681	0.62673			61.6	98.7
FALSE	High	Master Protein	Q9BYD3	39S ribosomal protein L4, mitochondrial OS=Homo sapiens GN=MRPL4 PE=1 SV=1	0	54.318	37	6	40	6	1	311	34.9	9.72	6944.53	43.16	6	6	cell organization and biogenesis;metabolic process	membrane;mitochondrion;ribosome	protein binding;RNA binding;structural molecule activity	Pf00573	51073	ENSG00000105364.13	MRPL4	19	Ribosome		0	113.7	61.4665	72.8333	36.7241	80.3	30.6597	153.8	43.7849	110.067	16.2769	69.2667	33.2114	0.640575	0.706245	0.715648	0.450368			52.2	99.2
FALSE	High	Master Protein	P61981	14-3-3 protein gamma OS=Homo sapiens GN=YWHAG PE=1 SV=2	0	54.28	40	10	82	6	1	247	28.3	4.89	14821.3	86.46	10	10	cell organization and biogenesis;regulation of biological process;response to stimulus;transport	cytoplasm;cytosol;membrane;mitochondrion	enzyme regulator activity;protein binding;RNA binding	Pf00244	7532	ENSG00000170027.6	YWHAG	7	Hippo signaling pathway; PI3K-Akt signaling pathway; Viral carcinogenesis; Oocyte meiosis; Epstein-Barr virus infection; Cell cycle	Sudden Infant Death Syndrome (SIDS) Susceptibility Pathways; Calcium Regulation in the Cardiac Cell; Cell Cycle; Prolactin Signaling Pathway; Myometrial Relaxation and Contraction Pathways	0	206	58.3638	264.75	57.7584	157.45	57.824	257.05	59.3055	208.85	59.571	105.9	57.8584	1.28519	0.76432	0.812488	0.411982				188.4
FALSE	High	Master Protein	P31943	Heterogeneous nuclear ribonucleoprotein H OS=Homo sapiens GN=HNRNPH1 PE=1 SV=4	0	54.117	26	9	48	7	1	449	49.2	6.3	8266.17	50.2	9	8	metabolic process;regulation of biological process;response to stimulus	cytosol;membrane;nucleus;spliceosomal complex	protein binding;RNA binding	Pf00076, Pf08080, Pf14259	3187	ENSG00000169045.17; ENSG00000284254.1	HNRNPH1	5; CHR_HG30_PATCH		mRNA Processing; Mecp2 and Associated Rett Syndrome	3	82.7	12.3177	100.033	35.2264	87.1	25.7329	108.633	33.9389	114.933	37.6877	106.633	14.2915	1.20959	1.0532	1.05799	0.981589			75.8	77.9
FALSE	High	Master Protein	O76003	Glutaredoxin-3 OS=Homo sapiens GN=GLRX3 PE=1 SV=2	0	54.042	32	10	52	10	1	335	37.4	5.39	9342.5	65.01	10	10	cell organization and biogenesis;cellular homeostasis;metabolic process;regulation of biological process	cytoplasm;cytosol;nucleus;spliceosomal complex	catalytic activity;metal ion binding;protein binding;RNA binding	Pf00085, Pf00462, Pf02114, Pf02966, Pf04908, Pf13098, Pf13905	10539	ENSG00000108010.11	GLRX3	10			0	123.2	22.9246	124	8.16908	74.2667	13.6902	122.433	4.07595	86.8	21.4066	69.3	13.3717	1.00649	0.602814	0.708957	0.566022			152.3	95.9
FALSE	High	Master Protein	P27816	Microtubule-associated protein 4 OS=Homo sapiens GN=MAP4 PE=1 SV=3	0	53.968	13	12	45	12	1	1152	120.9	5.43	7598.09	48.72	12	11	cell division;cell organization and biogenesis;cellular component movement;regulation of biological process	cytoplasm;cytoskeleton	protein binding;RNA binding;structural molecule activity	Pf00418	4134	ENSG00000047849.21	MAP4	3			0	101.133	26.3732	118.467	17.6472	87.5667	35.0492	81.3	26.753	130.933	9.75337	80.6	27.2987	1.17139	0.865854	1.6105	0.99139			125.6	72.7
FALSE	High	Master Protein	Q99714	3-hydroxyacyl-CoA dehydrogenase type-2 OS=Homo sapiens GN=HSD17B10 PE=1 SV=3	0	53.954	55	8	36	8	1	261	26.9	7.78	6587.69	47.7	8	8	cell organization and biogenesis;metabolic process	cytoplasm;membrane;mitochondrion;organelle lumen	catalytic activity;protein binding;RNA binding	Pf00106, Pf08659, Pf13561	3028	ENSG00000072506.12	HSD17B10	X	Alzheimer's disease; Valine, leucine and isoleucine degradation; Metabolic pathways	Valproic acid pathway; Tryptophan metabolism; Alzheimers Disease	0	125.55	58.7795	138.6	58.6245	103.1	57.8035	124.15	58.4048	192.7	61.3356	115.85	57.8356	1.10394	0.821187	1.55215	0.933145				111.7
FALSE	High	Master Protein	Q92688	Acidic leucine-rich nuclear phosphoprotein 32 family member B OS=Homo sapiens GN=ANP32B PE=1 SV=1	0	53.91	29	8	46	3	1	251	28.8	4.06	9017.85	65.76	8	8	cell organization and biogenesis;metabolic process;regulation of biological process	cytoplasm;nucleus	protein binding	Pf12799, Pf13855, Pf14580	10541	ENSG00000136938.8	ANP32B	9			0	164.25	58.9615	179.85	58.3225	63.85	57.9073	167.05	57.811	120.7	62.8578	104.3	67.7125	1.09498	0.388737	0.722538	0.624364			144.6
FALSE	High	Master Protein	P46779	60S ribosomal protein L28 OS=Homo sapiens GN=RPL28 PE=1 SV=3	0	53.822	35	8	67	8	1	137	15.7	12.02	11888.4	59.28	8	8	cell organization and biogenesis;metabolic process;regulation of biological process;transport	cytosol;membrane;ribosome	protein binding;RNA binding;structural molecule activity	Pf01778	6158	ENSG00000108107.14	RPL28	19	Ribosome	Cytoplasmic Ribosomal Proteins	0	51.2333	58.726	91.4	25.4147	136.2	8.28199	64.9667	21.8825	81.1333	15.4704	175.067	23.4233	1.78399	2.65843	1.24885	2.69472			16.9	73
FALSE	High	Master Protein	P28066	Proteasome subunit alpha type-5 OS=Homo sapiens GN=PSMA5 PE=1 SV=3	0	53.763	48	7	48	7	1	241	26.4	4.79	7472.93	49.21	7	7	metabolic process;regulation of biological process;response to stimulus;transport	cytoplasm;cytosol;extracellular;nucleus;organelle lumen;proteasome	catalytic activity;nucleotide binding;protein binding	Pf00227, Pf10584	5686	ENSG00000143106.12	PSMA5	1	Proteasome	Proteasome Degradation	0	174.5	59.5698	105.8	60.4917	110.8	57.7605	176.85	57.8265	133.75	57.7356	98.25	59.5789	0.606304	0.634957	0.756291	0.555556				148.9
FALSE	High	Master Protein	Q14444	Caprin-1 OS=Homo sapiens GN=CAPRIN1 PE=1 SV=2	0	53.696	11	9	47	9	1	709	78.3	5.25	8798.1	56.8	9	9	cell differentiation;regulation of biological process	cytoplasm;cytosol;membrane	protein binding;RNA binding	Pf12287	4076	ENSG00000135387.20	CAPRIN1	11			0	129.1	12.2794	121.133	17.2061	85.5333	30.4618	79.1667	22.4435	103.233	18.8468	81.8667	16.4926	0.938291	0.662536	1.304	1.03411			146.6	125
FALSE	High	Master Protein	P60660	Myosin light polypeptide 6 OS=Homo sapiens GN=MYL6 PE=1 SV=2	0	53.575	56	8	67	6	1	151	16.9	4.65	10254.5	68.53	8	8	cellular component movement	cytosol;membrane	catalytic activity;metal ion binding;motor activity;protein binding;structural molecule activity	Pf00036, Pf13405, Pf13499	4637	ENSG00000092841.18	MYL6	12	Oxytocin signaling pathway; Vascular smooth muscle contraction	Focal Adhesion	3	145	48.0832	87.2333	17.4473	73.3	9.63613	136.1	62.9773	102.4	20.5227	55.9667	29.4175	0.601609	0.505517	0.752388	0.411217			211.3	72.3
FALSE	High	Master Protein	P43686	26S proteasome regulatory subunit 6B OS=Homo sapiens GN=PSMC4 PE=1 SV=2	0	53.467	28	10	54	10	1	418	47.3	5.21	9366.47	52.05	10	10	metabolic process;regulation of biological process;response to stimulus;transport	cytoplasm;cytosol;membrane;nucleus;proteasome	catalytic activity;nucleotide binding;protein binding;RNA binding	Pf00004, Pf00006, Pf00910, Pf01057, Pf01078, Pf05496, Pf07724, Pf07726, Pf07728, Pf13191	5704	ENSG00000281221.2; ENSG00000013275.7	PSMC4	19; CHR_HG2021_PATCH	Epstein-Barr virus infection; Proteasome	Proteasome Degradation; Parkin-Ubiquitin Proteasomal System pathway	0	131.5	11.3812	97.0667	8.78067	81.7667	6.2771	131.833	5.95646	83.2667	10.4727	74.6333	9.24067	0.73815	0.6218	0.631606	0.566119			136	114.8
FALSE	High	Master Protein	O14617-5	Isoform 5 of AP-3 complex subunit delta-1 OS=Homo sapiens GN=AP3D1	0	53.439	8	9	36	9	1	1215	136.6	7.64	6119.05	42.56	9	9	cell organization and biogenesis;cellular component movement;metabolic process;regulation of biological process;transport	Golgi;membrane	transporter activity	Pf01602, Pf06375	8943	ENSG00000065000.15	AP3D1	19			0	170.4	58.5708	123.25	59.6036	114.4	59.5306	142.95	57.7428	146.45	59.5139	102.6	57.7588	0.723298	0.671362	1.02448	0.717733			153.6
FALSE	High	Master Protein	Q9UHI6	Probable ATP-dependent RNA helicase DDX20 OS=Homo sapiens GN=DDX20 PE=1 SV=2	0	53.389	17	12	32	12	1	824	92.2	6.95	5168.71	39.86	11	12	cell organization and biogenesis;metabolic process;regulation of biological process;transport	cytoplasm;cytoskeleton;cytosol;membrane;nucleus	catalytic activity;DNA binding;nucleotide binding;protein binding	Pf00270, Pf00271	11218	ENSG00000064703.11	DDX20	1	RNA transport	mRNA Processing	0	116.933	36.7524	69.3333	34.6947	94.3667	18.102	129.667	30.5548	103.733	11.2316	86.0333	36.9299	0.59293	0.807013	0.8	0.663496			67.4	144.3
FALSE	High	Master Protein	P68036-3	Isoform 3 of Ubiquitin-conjugating enzyme E2 L3 OS=Homo sapiens GN=UBE2L3	0	53.338	34	5	48	5	1	212	24	8.75	9459.26	69.9	5	5	cell proliferation;metabolic process;regulation of biological process;response to stimulus	cytoplasm;cytosol;nucleus	catalytic activity;enzyme regulator activity;nucleotide binding;protein binding;RNA binding	Pf00179	7332	ENSG00000185651.14	UBE2L3	22		Parkin-Ubiquitin Proteasomal System pathway; Parkinsons Disease Pathway	0	137.4	24.334	103.533	37.4186	79.6	23.751	114.633	10.0351	108.6	23.0815	56.3	28.4242	0.753518	0.57933	0.947368	0.491131			148.2	99.9
FALSE	High	Master Protein	P08134	Rho-related GTP-binding protein RhoC OS=Homo sapiens GN=RHOC PE=1 SV=1	0	53.239	30	8	56	1	1	193	22	6.58	10815.9	95.75	8	8	cell organization and biogenesis;cellular component movement;regulation of biological process;response to stimulus	cytosol;membrane;nucleus	catalytic activity;nucleotide binding;protein binding;signal transducer activity	Pf00025, Pf00071, Pf08477	389	ENSG00000155366.16	RHOC	1		Spinal Cord Injury; VEGFA-VEGFR2 Signaling Pathway	0	109.1	5.75119	77.3333	36.2946	90.2667	17.7669	120.033	19.1324	108.233	16.309	95.0333	23.3356	0.70883	0.827375	0.901694	0.791725			113.9	102
FALSE	High	Master Protein	P78346-2	Isoform 2 of Ribonuclease P protein subunit p30 OS=Homo sapiens GN=RPP30	0	53.231	33	9	35	9	1	322	35.5	9.61	5931.24	43.81	8	9	metabolic process	nucleus	catalytic activity;protein binding;RNA binding	Pf01876, Pf13900	10556	ENSG00000148688.13	RPP30	10			0	107.9	40.8328	92.4667	6.73673	92.0667	19.4525	106.133	14.5956	107.8	38.4028	93.6333	22.9143	0.856966	0.853259	1.0157	0.882224			98.5	69.3
FALSE	High	Master Protein	Q15293	Reticulocalbin-1 OS=Homo sapiens GN=RCN1 PE=1 SV=1	0	53.149	49	12	48	12	1	331	38.9	5	7804.05	40.63	12	12	metabolic process	endoplasmic reticulum;organelle lumen	metal ion binding;protein binding	Pf13499	5954	ENSG00000049449.8	RCN1	11			0	126.467	22.6003	141.233	21.9621	56.3333	50.503	107.833	9.34025	106.433	21.5943	61.6667	30.4659	1.11676	0.44544	0.987017	0.57187			158.1	102.5
FALSE	High	Master Protein	O14737	Programmed cell death protein 5 OS=Homo sapiens GN=PDCD5 PE=1 SV=3	0	53.031	66	11	64	11	1	125	14.3	6.04	11103.7	72.6	11	11	cell death;regulation of biological process;response to stimulus	cytoplasm;cytosol;nucleus	DNA binding;enzyme regulator activity;protein binding	Pf01984	9141	ENSG00000105185.11	PDCD5	19			0	175	37.3648	128.667	8.00531	60	40.8697	102.767	47.7477	89.5667	32.684	44	21.5945	0.735238	0.342857	0.871554	0.428154			248	121.8
FALSE	High	Master Protein	Q10567	AP-1 complex subunit beta-1 OS=Homo sapiens GN=AP1B1 PE=1 SV=2	0	52.961	16	14	48	8	1	949	104.6	5.06	7028.62	54.32	13	14	regulation of biological process;transport	cytosol;Golgi;membrane	protein binding;transporter activity	Pf01602, Pf02883, Pf09066, Pf12717, Pf13646	162		AP1B1	22	Lysosome		0	104.867	5.70351	103.333	24.6754	64.5333	56.988	109.9	9.44432	111.267	34.7734	106.033	22.3071	0.985378	0.615385	1.01244	0.964816			110.2	98.4
FALSE	High	Master Protein	Q9NP92	39S ribosomal protein S30, mitochondrial OS=Homo sapiens GN=MRPS30 PE=1 SV=2	0	52.945	30	8	48	8	1	439	50.3	7.97	7546.11	42.39	8	8	cell death;cell organization and biogenesis;metabolic process	membrane;mitochondrion;ribosome	RNA binding;structural molecule activity	Pf07147	10884	ENSG00000112996.10	MRPS30	5			0	104.2	59.2398	92.4333	21.6387	82.8	7.74549	170.933	63.5184	75.9333	43.0184	73.7333	24.797	0.887076	0.794626	0.444228	0.431357			33.1	144.1
FALSE	High	Master Protein	Q12874	Splicing factor 3A subunit 3 OS=Homo sapiens GN=SF3A3 PE=1 SV=1	0	52.941	25	11	41	11	1	501	58.8	5.38	7079.13	50.36	11	11	cell organization and biogenesis;metabolic process	nucleus;spliceosomal complex	metal ion binding;protein binding;RNA binding	Pf11931, Pf12108, Pf13297	10946	ENSG00000183431.11	SF3A3	1	Spliceosome	mRNA Processing; Exercise-induced Circadian Regulation	0	95.8	3.92934	108.667	8.69831	93.8667	4.46724	85.7667	10.6354	105.067	5.9851	110.767	2.3164	1.13431	0.979819	1.22503	1.29149			99.9	92.5
FALSE	High	Master Protein	P06753-2	Isoform 2 of Tropomyosin alpha-3 chain OS=Homo sapiens GN=TPM3	0	52.873	49	14	73	10	1	248	29	4.78	10242.9	64.93	13	14	cell organization and biogenesis;cellular component movement	cytoskeleton;cytosol	protein binding;structural molecule activity	Pf00261, Pf12718	7170	ENSG00000143549.19	TPM3	1		Striated Muscle Contraction	4	123.533	21.846	151.633	13.7612	62.7	42.3883	104.733	18.9671	96.9	37.0916	60.5	9.65493	1.22747	0.507555	0.925207	0.577658			153.4	100.9
FALSE	High	Master Protein	O95793	Double-stranded RNA-binding protein Staufen homolog 1 OS=Homo sapiens GN=STAU1 PE=1 SV=2	0	52.87	17	10	42	7	1	577	63.1	9.44	6800.01	41.43	10	10	regulation of biological process;response to stimulus	cytoplasm;cytosol;endoplasmic reticulum;membrane	protein binding;RNA binding	Pf00035, Pf14709	6780	ENSG00000124214.19	STAU1	20			4	102.6	10.4461	92.5333	15.0373	98.9333	4.5947	90.8333	33.4897	111.833	15.0894	103.3	16.0583	0.901884	0.964263	1.23119	1.13725			114.8	94.7
FALSE	High	Master Protein	P63173	60S ribosomal protein L38 OS=Homo sapiens GN=RPL38 PE=1 SV=2	0	52.736	57	9	73	9	1	70	8.2	10.1	13427.4	94.74	9	9	cell organization and biogenesis;metabolic process;regulation of biological process;transport	cytosol;ribosome	RNA binding;structural molecule activity	Pf01781	6169	ENSG00000172809.12	RPL38	17	Ribosome	Cytoplasmic Ribosomal Proteins; Mesodermal Commitment Pathway	0	50.2	23.9897	102.7	39.7997	145.4	26.5926	65.5333	20.7159	96.5667	35.4399	139.6	18.4298	2.04582	2.89641	1.47355	2.13021			42.9	64.1
FALSE	High	Master Protein	Q9HCC0	Methylcrotonoyl-CoA carboxylase beta chain, mitochondrial OS=Homo sapiens GN=MCCC2 PE=1 SV=1	0	52.569	17	10	39	10	1	563	61.3	7.68	7431.11	59.07	9	9	cell organization and biogenesis;metabolic process	cytosol;mitochondrion;organelle lumen	catalytic activity;nucleotide binding;protein binding	Pf01039	64087	ENSG00000131844.15	MCCC2	5	Metabolic pathways; Valine, leucine and isoleucine degradation		0	176.1	58.4813	93.95	66.1063	113	58.0387	146	58.2515	168.65	58.9704	102.35	58.7179	0.533504	0.641681	1.15514	0.701027			159.7
FALSE	High	Master Protein	O15371	Eukaryotic translation initiation factor 3 subunit D OS=Homo sapiens GN=EIF3D PE=1 SV=1	0	52.549	18	10	39	10	1	548	63.9	6.05	6747.63	50.14	10	10	cell organization and biogenesis;metabolic process;regulation of biological process	cytoplasm;cytosol;membrane	protein binding;RNA binding	Pf05091	8664	ENSG00000100353.17	EIF3D	22	RNA transport	Translation Factors	0	124.033	9.47329	95.7667	15.9529	92.0667	14.5945	102.6	17.4953	94.8	13.2084	90.7	10.4897	0.772104	0.742274	0.923977	0.884016			112.3	124
FALSE	High	Master Protein	Q9H307	Pinin OS=Homo sapiens GN=PNN PE=1 SV=4	0	52.441	25	15	28	14	1	717	81.6	7.14	4836.57	22.08	15	13	metabolic process;regulation of biological process	membrane;nucleus;spliceosomal complex	DNA binding;protein binding;RNA binding;structural molecule activity	Pf04696, Pf04697	5411		PNN	14	mRNA surveillance pathway; RNA transport		0	69.15	77.6925	253.55	57.8266	217.55	62.2183	84.65	60.7687	286.1	62.2122	288.95	58.534	3.66667	3.14606	3.3798	3.41347				105.1
FALSE	High	Master Protein	P39687	Acidic leucine-rich nuclear phosphoprotein 32 family member A OS=Homo sapiens GN=ANP32A PE=1 SV=1	0	52.433	31	9	48	4	1	249	28.6	4.09	9438.61	67.18	9	9	cell organization and biogenesis;metabolic process;regulation of biological process;response to stimulus;transport	cytoplasm;endoplasmic reticulum;nucleus	protein binding;RNA binding	Pf12799, Pf13855, Pf14580	8125	ENSG00000140350.15	ANP32A	15			5	137.933	16.5053	122.233	5.21882	71.6333	35.9044	99.6	10.7781	97.6667	26.8612	70.9667	27.5136	0.886177	0.519333	0.980589	0.712517			155.8	112.3
FALSE	High	Master Protein	O00232	26S proteasome non-ATPase regulatory subunit 12 OS=Homo sapiens GN=PSMD12 PE=1 SV=3	0	52.326	28	11	37	11	1	456	52.9	7.65	6889.19	38.31	10	10	metabolic process;regulation of biological process;response to stimulus;transport	cytoplasm;cytosol;extracellular;membrane;organelle lumen;proteasome	catalytic activity;protein binding	Pf01399	5718	ENSG00000197170.9	PSMD12	17	Proteasome; Epstein-Barr virus infection	Proteasome Degradation; Parkin-Ubiquitin Proteasomal System pathway	0	109.833	10.5321	113.567	5.15423	79.0667	18.8539	132	5.83481	87.3	17.5115	78.2333	45.269	1.03399	0.719879	0.661364	0.592677			105.7	100.9
FALSE	High	Master Protein	Q13177	Serine/threonine-protein kinase PAK 2 OS=Homo sapiens GN=PAK2 PE=1 SV=3	0	52.194	20	9	47	8	1	524	58	5.96	9661.55	76.64	9	9	cell death;cell organization and biogenesis;cellular component movement;metabolic process;regulation of biological process;response to stimulus	cytoplasm;cytosol;membrane;nucleus	catalytic activity;enzyme regulator activity;nucleotide binding;protein binding	Pf00069, Pf00786, Pf07714, Pf14531	5062	ENSG00000180370.10	PAK2	3	Focal adhesion; Ras signaling pathway; ErbB signaling pathway; T cell receptor signaling pathway; Axon guidance; Regulation of actin cytoskeleton; Renal cell carcinoma; MAPK signaling pathway	Apoptosis-related network due to altered Notch3 in ovarian cancer; TGF-beta Signaling Pathway; Focal Adhesion; Regulation of Actin Cytoskeleton; VEGFA-VEGFR2 Signaling Pathway; MAPK Signaling Pathway; Fas Ligand (FasL) pathway and Stress induction of Heat Shock Proteins (HSP) regulation; Integrin-mediated Cell Adhesion	1	106.533	4.20242	107.333	8.95251	83.6	2.96158	105.533	2.85111	115.333	5.47366	81.6333	3.78824	1.00751	0.784731	1.09286	0.773531			111.7	104.1
FALSE	High	Master Protein	O00429-6	Isoform 6 of Dynamin-1-like protein OS=Homo sapiens GN=DNM1L	0	52.184	18	9	28	9	1	749	83.3	7.08	5364.25	32.05	9	9	cell death;cell organization and biogenesis;regulation of biological process;transport	cytoplasm;cytosol;endoplasmic reticulum;Golgi;membrane;mitochondrion	catalytic activity;enzyme regulator activity;nucleotide binding;protein binding	Pf00350, Pf01031, Pf02212	10059	ENSG00000087470.17	DNM1L	12		Synaptic Vesicle Pathway	0	104.833	11.3751	101.2	6.76932	88.5	10.1059	98.9667	13.0031	118.433	7.39491	88.0333	11.0754	0.965342	0.844197	1.1967	0.889525			109.4	91.3
FALSE	High	Master Protein	P63010-2	Isoform 2 of AP-2 complex subunit beta OS=Homo sapiens GN=AP2B1	0	52.116	21	17	44	11	1	951	105.6	5.34	6147.62	36.61	17	17	cell organization and biogenesis;cellular component movement;metabolic process;regulation of biological process;response to stimulus;transport	cytoplasm;cytosol;membrane	protein binding;transporter activity	Pf01602, Pf02883, Pf09066, Pf12717, Pf13646	163	ENSG00000006125.17	AP2B1	17		EGF/EGFR Signaling Pathway; Synaptic Vesicle Pathway	4	118.533	18.2645	99.4333	7.30039	87.6333	4.49597	101.5	5.15338	104.4	17.4918	88.4667	1.93928	0.838864	0.739314	1.02857	0.871593			141.5	98.5
FALSE	High	Master Protein	Q9NTK5	Obg-like ATPase 1 OS=Homo sapiens GN=OLA1 PE=1 SV=2	0	52.109	27	10	52	10	1	396	44.7	7.81	8248.1	62.08	10	10	metabolic process;transport	cytoplasm;cytosol;extracellular;membrane;nucleus;organelle lumen	catalytic activity;metal ion binding;nucleotide binding;protein binding	Pf01926, Pf02421, Pf06071	29789	ENSG00000138430.15	OLA1	2			0	122.667	15.4755	100.933	9.07463	85.6667	10.0771	107.6	11.9351	95.5667	5.97482	87.5667	22.1664	0.822826	0.69837	0.888166	0.813817			137.9	101.4
FALSE	High	Master Protein	P22061-2	Isoform 2 of Protein-L-isoaspartate(D-aspartate) O-methyltransferase OS=Homo sapiens GN=PCMT1	0	52.052	53	10	31	10	1	228	24.7	6.52	4718.91	28.4	10	10	metabolic process	cytoplasm;cytosol	catalytic activity;protein binding	Pf01135, Pf01209, Pf05175, Pf06325, Pf08241, Pf12847, Pf13489, Pf13659, Pf13847	5110		PCMT1	6			0	115.967	6.57984	101.467	1.08111	75.6667	20.8301	110.4	15.6215	121.933	4.64317	74.5333	18.5552	0.874964	0.652486	1.10447	0.675121			113.6	109.8
FALSE	High	Master Protein	Q00688	Peptidyl-prolyl cis-trans isomerase FKBP3 OS=Homo sapiens GN=FKBP3 PE=1 SV=1	0	52.008	36	8	44	8	1	224	25.2	9.28	7934.12	50.11	8	8	metabolic process	cytoplasm;nucleus	catalytic activity;protein binding;receptor activity;RNA binding	Pf00254	2287	ENSG00000100442.10	FKBP3	14			0	117.167	33.1998	140.5	35.9553	70.8667	37.358	91.3667	5.57797	109.867	26.1792	70.1667	24.2801	1.19915	0.604836	1.20248	0.767968			160.4	85
FALSE	High	Master Protein	Q9BUJ2	Heterogeneous nuclear ribonucleoprotein U-like protein 1 OS=Homo sapiens GN=HNRNPUL1 PE=1 SV=2	0	52.007	9	9	29	8	1	856	95.7	6.92	5476.88	47	8	8	metabolic process;regulation of biological process;response to stimulus	nucleus	protein binding;RNA binding	Pf00622, Pf02037, Pf13671	11100	ENSG00000105323.16	HNRNPUL1	19	Influenza A		0	94.9667	34.1329	59.2	58.898	86.2	19.1049	107.1	27.8803	129.033	14.9259	123.533	33.0553	0.623377	0.907687	1.20479	1.15344			62	96.1
FALSE	High	Master Protein	P35268	60S ribosomal protein L22 OS=Homo sapiens GN=RPL22 PE=1 SV=2	0	51.935	59	7	46	7	1	128	14.8	9.19	8376.02	68.5	7	7	cell organization and biogenesis;metabolic process;transport	cytoplasm;cytosol;nucleus;ribosome	protein binding;RNA binding;structural molecule activity	Pf01776	6146	ENSG00000116251.9	RPL22	1	Ribosome	Cytoplasmic Ribosomal Proteins	0	67.5333	21.808	109	45.0993	124.7	22.3644	81.4667	36.0475	78.3	4.98084	138.967	42.8432	1.61402	1.8465	0.961129	1.70581			83.4	64.9
FALSE	High	Master Protein	O75368	SH3 domain-binding glutamic acid-rich-like protein OS=Homo sapiens GN=SH3BGRL PE=1 SV=1	0	51.883	39	5	40	5	1	114	12.8	5.25	6652.25	48.32	5	5	cellular homeostasis;regulation of biological process	cytoplasm;nucleus	catalytic activity;protein binding	Pf00462, Pf04908	6451	ENSG00000131171.12	SH3BGRL	X			0	170.8	58.2194	142.6	57.9615	83.35	58.8844	143.75	59.2677	201.1	57.8282	58.35	58.1305	0.834895	0.487998	1.39896	0.405913			183.6
FALSE	High	Master Protein	P10599	Thioredoxin OS=Homo sapiens GN=TXN PE=1 SV=3	0	51.854	64	6	99	6	1	105	11.7	4.92	14420.6	105.87	6	6	cell communication;cell proliferation;cellular component movement;cellular homeostasis;metabolic process;regulation of biological process;response to stimulus;transport	cytoplasm;cytosol;extracellular;mitochondrion;nucleus	antioxidant activity;catalytic activity;protein binding;RNA binding	Pf00085, Pf00462, Pf13098, Pf13899, Pf13905	7295	ENSG00000136810.12	TXN	9	NOD-like receptor signaling pathway	VEGFA-VEGFR2 Signaling Pathway; Selenium Micronutrient Network; NRF2 pathway; TNF alpha Signaling Pathway	0	160.233	10.3932	140.267	22.1187	58.5	31.7328	112.467	10.232	82	45.6288	46.5667	42.7384	0.87539	0.365093	0.729105	0.414049			178.9	154.9
FALSE	High	Master Protein	P20340	Ras-related protein Rab-6A OS=Homo sapiens GN=RAB6A PE=1 SV=3	0	51.816	48	8	39	1	1	208	23.6	5.54	7093.55	42.48	8	8	cellular component movement;metabolic process;regulation of biological process;response to stimulus;transport	cytosol;Golgi;membrane	catalytic activity;nucleotide binding;protein binding	Pf00025, Pf00071, Pf02421, Pf04670, Pf08477, Pf09439	5870	ENSG00000175582.19	RAB6A	11			6	99.9667	31.1524	127.9	22.9868	90.3667	18.0632	126.567	12.4154	81.8	15.157	73.3667	13.3689	1.27943	0.903968	0.6463	0.579668			72.5	93.6
FALSE	High	Master Protein	Q07065	Cytoskeleton-associated protein 4 OS=Homo sapiens GN=CKAP4 PE=1 SV=2	0	51.805	27	13	39	13	1	602	66	5.92	6613.79	33.72	13	12	metabolic process;transport	cytoplasm;cytoskeleton;cytosol;endoplasmic reticulum;membrane;organelle lumen	RNA binding	Pf13166	10970	ENSG00000136026.13	CKAP4	12	Protein processing in endoplasmic reticulum		0	100.733	12.4214	102.133	27.2426	119.133	42.8484	99.6333	22.5257	96.1667	28.224	82.2	26.507	1.0139	1.18266	0.965206	0.825025			89.3	98.8
FALSE	High	Master Protein	P61289-2	Isoform 2 of Proteasome activator complex subunit 3 OS=Homo sapiens GN=PSME3	0	51.723	43	9	47	9	1	267	30.9	6.11	8086.72	46.83	9	9	cell death;metabolic process;regulation of biological process;response to stimulus;transport	cytoplasm;cytosol;membrane;nucleus;proteasome	enzyme regulator activity;protein binding	Pf02251, Pf02252	10197	ENSG00000131467.10	PSME3	17		Proteasome Degradation	0	131.2	14.9213	110.467	27.1751	75.3333	23.4074	110.9	16.9529	88.6	21.9833	83.4667	31.7511	0.841972	0.574187	0.798918	0.75263			124.7	115.7
FALSE	High	Master Protein	Q8TDN6	Ribosome biogenesis protein BRX1 homolog OS=Homo sapiens GN=BRIX1 PE=1 SV=2	0	51.656	42	12	53	12	1	353	41.4	9.92	8719	43.83	12	11	cell organization and biogenesis	nucleus	RNA binding	Pf04427	55299	ENSG00000113460.12	BRIX1	5		Gastric cancer network 2	0	52.7	52.6773	153.467	20.0666	106.167	19.3509	59.0667	46.1719	114.833	13.6435	113.767	21.4993	2.91208	2.01455	1.94413	1.92607			24.5	53.6
FALSE	High	Master Protein	P46060	Ran GTPase-activating protein 1 OS=Homo sapiens GN=RANGAP1 PE=1 SV=1	0	51.591	23	12	40	12	1	587	63.5	4.68	6449.29	36.37	12	11	cell organization and biogenesis;metabolic process;regulation of biological process;response to stimulus	chromosome;cytoplasm;cytoskeleton;cytosol;membrane;nucleus	enzyme regulator activity;protein binding;RNA binding	Pf07834, Pf13855	5905	ENSG00000100401.19	RANGAP1	22	RNA transport		0	143.5	35.5864	100.433	11.9459	86.4	11.3172	90.9667	30.567	108.367	6.46043	70.3333	60.6412	0.699884	0.602091	1.19128	0.773177			202.2	109.3
FALSE	High	Master Protein	P51398	28S ribosomal protein S29, mitochondrial OS=Homo sapiens GN=DAP3 PE=1 SV=1	0	51.562	35	11	42	11	1	398	45.5	8.88	6835.96	40.72	10	11	cell death;cell organization and biogenesis;metabolic process;regulation of biological process;response to stimulus	membrane;mitochondrion;ribosome	nucleotide binding;protein binding;RNA binding;structural molecule activity	Pf10236	7818	ENSG00000132676.15	DAP3	1			0	92	25.8007	117.533	10.2528	84.8333	12.425	128.767	41.3819	103.767	28.1863	73.1333	8.21141	1.27754	0.922101	0.80585	0.567952			66.3	96.6
FALSE	High	Master Protein	Q00325	Phosphate carrier protein, mitochondrial OS=Homo sapiens GN=SLC25A3 PE=1 SV=2	0	51.545	29	11	54	11	1	362	40.1	9.38	8737.4	55.76	11	11	transport	membrane;mitochondrion	protein binding;transporter activity	Pf00153	5250	ENSG00000075415.12	SLC25A3	12			0	86.6	42.1255	87.8	11.0267	90.3	25.1799	138.7	31.8621	104.767	10.2915	91.7667	4.57985	1.01386	1.04273	0.755347	0.66162			45.4	114.8
FALSE	High	Master Protein	Q13155	Aminoacyl tRNA synthase complex-interacting multifunctional protein 2 OS=Homo sapiens GN=AIMP2 PE=1 SV=2	0	51.255	49	10	40	10	1	320	35.3	8.22	6466.64	37.45	10	10	cell death;cell differentiation;cell organization and biogenesis;development;metabolic process;regulation of biological process	cytoplasm;cytosol;membrane;nucleus	protein binding;structural molecule activity	Pf13410, Pf14497	7965	ENSG00000106305.9	AIMP2	7		Transcriptional activation by NRF2; Osteoclast Signaling	0	234.8	57.9646	71.05	62.1521	85.8	58.0168	205	58.4211	121.95	57.8451	81.45	58.0288	0.302598	0.365417	0.594878	0.397317				222.7
FALSE	High	Master Protein	Q15459	Splicing factor 3A subunit 1 OS=Homo sapiens GN=SF3A1 PE=1 SV=1	0	51.244	22	12	43	12	1	793	88.8	5.22	6653.16	41.7	12	11	cell organization and biogenesis;metabolic process;regulation of biological process	nucleus;spliceosomal complex	protein binding;RNA binding	Pf00240, Pf01805, Pf12230, Pf14560	10291	ENSG00000099995.18	SF3A1	22	Spliceosome	mRNA Processing	0	90.8	9.74716	99.6	9.83936	99.1333	9.63036	73.2333	20.509	120.733	16.0587	116.533	7.83309	1.09692	1.09178	1.64861	1.59126			99.6	81.9
FALSE	High	Master Protein	P49736	DNA replication licensing factor MCM2 OS=Homo sapiens GN=MCM2 PE=1 SV=4	0	51.114	12	9	39	9	1	904	101.8	5.52	6748.7	42.02	9	9	cell death;cell organization and biogenesis;metabolic process;response to stimulus	chromosome;cytoplasm;cytoskeleton;cytosol;nucleus	catalytic activity;DNA binding;metal ion binding;nucleotide binding;protein binding	Pf00493, Pf01078, Pf07728, Pf12619, Pf14551	4171	ENSG00000073111.13	MCM2	3	DNA replication; Cell cycle	Cell Cycle; DNA Replication; G1 to S cell cycle control	0	97.7667	15.65	94.1667	15.1588	88.7	6.56218	108.333	20.8174	114.767	29.2676	96.2667	7.94945	0.963178	0.907262	1.05938	0.888615			88	89.9
FALSE	High	Master Protein	P84098	60S ribosomal protein L19 OS=Homo sapiens GN=RPL19 PE=1 SV=1	0	51.082	36	10	62	10	1	196	23.5	11.47	8545.73	33.13	10	10	cell organization and biogenesis;metabolic process;transport	cytosol;membrane;ribosome	protein binding;RNA binding;structural molecule activity	Pf01280	6143	ENSG00000108298.9	RPL19	17	Ribosome	Cytoplasmic Ribosomal Proteins	0	59.8667	21.5707	78.2667	23.1843	130.433	16.5897	67.3667	23.5608	128.967	45.1411	135.067	18.7933	1.30735	2.17873	1.9144	2.00495			45	68.3
FALSE	High	Master Protein	Q53GQ0	Very-long-chain 3-oxoacyl-CoA reductase OS=Homo sapiens GN=HSD17B12 PE=1 SV=2	0	51.065	22	7	39	7	1	312	34.3	9.32	6850.24	51.22	7	7	cell organization and biogenesis;metabolic process;regulation of biological process	endoplasmic reticulum;membrane	catalytic activity;protein binding	Pf00106, Pf03435, Pf08659, Pf13460, Pf13561	51144	ENSG00000149084.12	HSD17B12	11	Fatty acid elongation; Metabolic pathways; Fatty acid metabolism; Biosynthesis of unsaturated fatty acids; Steroid hormone biosynthesis		0	125.9	15.7462	99.5333	30.436	79.1333	9.15136	122.5	3.28666	93.1667	13.4722	79.7667	13.4891	0.790575	0.628541	0.760544	0.651156			111	118.3
FALSE	High	Master Protein	P36776	Lon protease homolog, mitochondrial OS=Homo sapiens GN=LONP1 PE=1 SV=2	0	51.024	11	10	44	9	1	959	106.4	6.39	7234.29	55.54	10	10	cell organization and biogenesis;metabolic process;response to stimulus	cytosol;membrane;mitochondrion;nucleus;organelle lumen	catalytic activity;DNA binding;nucleotide binding;protein binding;RNA binding	Pf00004, Pf00910, Pf01695, Pf02190, Pf05362, Pf05496, Pf07724, Pf07728, Pf08298, Pf13173, Pf13191, Pf13207, Pf13401, Pf13541	9361	ENSG00000196365.11	LONP1	19			1	110.867	22.3724	80.1667	8.91899	90.6	23.1788	121.433	15.6673	105.833	18.1142	91.1	13.5498	0.723091	0.817198	0.871534	0.750206			106.4	88.6
FALSE	High	Master Protein	Q02880	DNA topoisomerase 2-beta OS=Homo sapiens GN=TOP2B PE=1 SV=3	0	51.018	8	13	54	6	1	1626	183.2	8	7827.7	63.27	13	13	cell organization and biogenesis;cellular component movement;metabolic process;regulation of biological process	cytoplasm;cytosol;nucleus	catalytic activity;DNA binding;metal ion binding;nucleotide binding;protein binding	Pf00204, Pf00521, Pf01751, Pf02518, Pf08070, Pf13589	7155	ENSG00000077097.15	TOP2B	3	Platinum drug resistance		0	137.25	59.5367	120.4	62.6865	131.5	58.7786	144.3	59.1413	134.6	57.8847	131.95	59.5312	0.877231	0.958106	0.932779	0.914414			117.3
FALSE	High	Master Protein	P24752	Acetyl-CoA acetyltransferase, mitochondrial OS=Homo sapiens GN=ACAT1 PE=1 SV=1	0	50.872	28	10	46	10	1	427	45.2	8.85	7013.23	49.4	10	10	cell organization and biogenesis;metabolic process;response to stimulus	membrane;mitochondrion;organelle lumen	catalytic activity;metal ion binding;protein binding	Pf00108, Pf00109, Pf02803	38	ENSG00000075239.13	ACAT1	11	Metabolic pathways; Pyruvate metabolism; Propanoate metabolism; Tryptophan metabolism; Terpenoid backbone biosynthesis; Lysine degradation; Fatty acid degradation; Valine, leucine and isoleucine degradation; Fatty acid metabolism; Glyoxylate and dicarboxylate metabolism; Synthesis and degradation of ketone bodies; Carbon metabolism; Butanoate metabolism	Synthesis and Degradation of Ketone Bodies; Tryptophan metabolism; Fatty Acid Beta Oxidation	0	109.067	4.47798	109	25.6953	85.1	22.6024	100.833	10.6934	99.8333	5.28169	96.2333	3.22022	0.999389	0.780257	0.990083	0.95438			113	110.6
FALSE	High	Master Protein	Q9NR31	GTP-binding protein SAR1a OS=Homo sapiens GN=SAR1A PE=1 SV=1	0	50.694	27	4	44	3	1	198	22.4	6.68	8372.71	48.56	4	4	cell organization and biogenesis;regulation of biological process;response to stimulus;transport	endoplasmic reticulum;Golgi;membrane	catalytic activity;nucleotide binding;protein binding;signal transducer activity	Pf00025, Pf00071, Pf00503, Pf01926, Pf08477, Pf09439	56681	ENSG00000079332.14	SAR1A	10	Legionellosis; Protein processing in endoplasmic reticulum	Sterol Regulatory Element-Binding Proteins (SREBP) signalling	2	130.567	4.3226	108.2	22.3061	69.2667	11.3128	149.333	29.4564	89.1667	18.0517	53.5	70.3877	0.828695	0.530508	0.597098	0.358259			134.5	124.1
FALSE	High	Master Protein	P09960	Leukotriene A-4 hydrolase OS=Homo sapiens GN=LTA4H PE=1 SV=2	0	50.607	19	11	51	11	1	611	69.2	6.18	7701.69	60.07	10	11	metabolic process;transport	cytoplasm;cytosol;extracellular;nucleus	catalytic activity;metal ion binding;protein binding;RNA binding	Pf01433, Pf09127, Pf13485	4048	ENSG00000111144.9	LTA4H	12	Metabolic pathways; Arachidonic acid metabolism	Eicosanoid Synthesis	0	100.967	25.0843	98.7667	6.77106	88.9333	10.9396	96.4667	16.2179	122.2	16.3642	92.7	11.6779	0.978211	0.880819	1.26676	0.960954			113.7	71.8
FALSE	High	Master Protein	Q04917	14-3-3 protein eta OS=Homo sapiens GN=YWHAH PE=1 SV=4	0	50.597	38	8	70	5	1	246	28.2	4.84	12221.1	70.62	8	8	cell organization and biogenesis;metabolic process;regulation of biological process;response to stimulus;transport	cytoplasm;cytosol;membrane;mitochondrion	catalytic activity;protein binding	Pf00244	7533	ENSG00000128245.14	YWHAH	22	Cell cycle; Epstein-Barr virus infection; Oocyte meiosis; Viral carcinogenesis; PI3K-Akt signaling pathway; Hippo signaling pathway	Sudden Infant Death Syndrome (SIDS) Susceptibility Pathways; Myometrial Relaxation and Contraction Pathways; Calcium Regulation in the Cardiac Cell; Cell Cycle	0	216.8	63.6904	244.15	57.8411	171.5	58.4933	259.5	58.0512	191.45	57.7357	116.55	59.8659	1.12615	0.791052	0.737765	0.449133				158.5
FALSE	High	Master Protein	P82933	28S ribosomal protein S9, mitochondrial OS=Homo sapiens GN=MRPS9 PE=1 SV=2	0	50.499	33	11	40	11	1	396	45.8	9.51	6078.31	28.87	11	11	cell organization and biogenesis;metabolic process;response to stimulus	membrane;mitochondrion;ribosome	protein binding;RNA binding;structural molecule activity	Pf00380	64965	ENSG00000135972.8	MRPS9	2	Ribosome		0	194.75	58.0879	244.5	58.1922	169.6	65.3989	191.65	59.6259	234.45	57.7946	165.1	59.3496	1.25546	0.87086	1.22332	0.861466				182.3
FALSE	High	Master Protein	P57678	Gem-associated protein 4 OS=Homo sapiens GN=GEMIN4 PE=1 SV=2	0	50.289	16	15	43	15	1	1058	120	6.04	5924.18	44.47	14	15	cell organization and biogenesis;metabolic process;transport	cytoplasm;cytosol;membrane;nucleus	protein binding		50628	ENSG00000179409.10	GEMIN4	17	RNA transport		0	178.9	58.4759	104.2	58.4504	104.1	57.9851	158.55	58.4598	148.8	58.0651	105.45	58.1542	0.582448	0.581889	0.938505	0.66509				195.5
FALSE	High	Master Protein	O75947	ATP synthase subunit d, mitochondrial OS=Homo sapiens GN=ATP5H PE=1 SV=3	0	50.128	76	11	65	11	1	161	18.5	5.3	9250.37	64.81	10	11	cell organization and biogenesis;metabolic process;transport	cytosol;membrane;mitochondrion	catalytic activity;transporter activity	Pf05873	10476	ENSG00000167863.11	ATP5H	17	Parkinson's disease; Metabolic pathways; Alzheimer's disease; Huntington's disease; Oxidative phosphorylation	Electron Transport Chain; Oxidative phosphorylation	0	139.2	32.4788	97.7667	38.4886	82.9667	30.8523	126.8	33.776	89.6333	27.136	63.7	23.882	0.702347	0.596025	0.706887	0.502366			112.5	113.7
FALSE	High	Master Protein	P82650	28S ribosomal protein S22, mitochondrial OS=Homo sapiens GN=MRPS22 PE=1 SV=1	0	50.117	41	12	55	12	1	360	41.3	7.9	9291.73	64.6	11	12	cell organization and biogenesis;metabolic process	membrane;mitochondrion;ribosome	structural molecule activity	Pf10245	56945	ENSG00000175110.11	MRPS22	3			0	92.2	14.5769	114.733	39.3162	82.2667	18.8832	108.9	11.4032	121.767	32.0285	80.1667	21.3966	1.2444	0.892263	1.11815	0.736149			76.9	102.1
FALSE	High	Master Protein	P43243	Matrin-3 OS=Homo sapiens GN=MATR3 PE=1 SV=2	0	50.046	19	11	48	11	1	847	94.6	6.25	6673.82	49.08	10	11	defense response;regulation of biological process;response to stimulus	membrane;nucleus	metal ion binding;protein binding;RNA binding;structural molecule activity	Pf00076, Pf13893, Pf14259	9782	ENSG00000015479.18; ENSG00000280987.4	MATR3	5			0	88.0667	13.3006	81.4333	10.7	99.6333	32.02	72.1667	35.4703	125.333	17.7881	133.333	13.9056	0.924678	1.13134	1.73672	1.84758			78.7	84.3
FALSE	High	Master Protein	Q99536	Synaptic vesicle membrane protein VAT-1 homolog OS=Homo sapiens GN=VAT1 PE=1 SV=2	0	49.874	20	7	40	7	1	393	41.9	6.29	6992.85	46.12	7	7	metabolic process;regulation of biological process;transport	cytoplasm;extracellular;membrane;mitochondrion;organelle lumen	catalytic activity;metal ion binding	Pf00107, Pf08240, Pf13602	10493	ENSG00000108828.15	VAT1	17			0	102.733	18.5276	92.0333	14.0164	85.6667	22.4854	107.9	17.3576	111.333	13.6735	100.333	8.05605	0.895847	0.833874	1.03182	0.929873			119	81.8
FALSE	High	Master Protein	Q04837	Single-stranded DNA-binding protein, mitochondrial OS=Homo sapiens GN=SSBP1 PE=1 SV=1	0	49.871	48	7	48	7	1	148	17.2	9.6	8697.37	47.53	7	7	cell organization and biogenesis;metabolic process;regulation of biological process	mitochondrion;nucleus;organelle lumen	DNA binding;protein binding;RNA binding	Pf00436	6742	ENSG00000106028.10	SSBP1	7	Homologous recombination; DNA replication; Mismatch repair		0	54	40.048	141.5	40.4447	99.9333	35.9021	40.4667	41.8674	189.067	30.3312	75	18.4641	2.62037	1.85062	4.67216	1.85338			70.8	61.6
FALSE	High	Master Protein	P62263	40S ribosomal protein S14 OS=Homo sapiens GN=RPS14 PE=1 SV=3	0	49.591	38	6	20	6	1	151	16.3	10.05	4510.56	25.87	6	6	cell differentiation;cell organization and biogenesis;metabolic process;regulation of biological process;transport	cytosol;membrane;mitochondrion;ribosome	protein binding;RNA binding;structural molecule activity;translation regulator activity	Pf00411	6208	ENSG00000164587.11	RPS14	5	Ribosome	Cytoplasmic Ribosomal Proteins	0	99.25	58.9363	103.3	57.7371	159.7	57.9308	118.5	57.7471	133.55	57.8953	185.7	58.0778	1.04081	1.60907	1.127	1.56709			87.5	111
FALSE	High	Master Protein	Q9Y520-7	Isoform 7 of Protein PRRC2C OS=Homo sapiens GN=PRRC2C	0	49.584	4	13	38	11	1	2898	316.9	9.13	6280.39	49.1	13	13	cell differentiation	membrane	protein binding;RNA binding	Pf07001	23215		PRRC2C	1			1	111.667	31.1971	124.3	29.8029	83.3333	43.3214	85.4	28.6043	122.833	32.4248	72.4333	47.6991	1.11313	0.746269	1.43833	0.848165			127.7	71.7
FALSE	High	Master Protein	Q9Y3I0	tRNA-splicing ligase RtcB homolog OS=Homo sapiens GN=RTCB PE=1 SV=1	0	49.36	33	12	34	12	1	505	55.2	7.23	5497.28	30.09	12	12	metabolic process	cytoplasm;cytosol;membrane;nucleus	catalytic activity;metal ion binding;nucleotide binding;protein binding;RNA binding	Pf01139	51493	ENSG00000100220.11	C22orf28; RTCB	22			0	151.7	58.4068	123.8	57.8545	114.4	58.8092	135.1	58.246	150.15	58.0916	124.95	57.7936	0.816084	0.75412	1.1114	0.92487				138.3
FALSE	High	Master Protein	P61353	60S ribosomal protein L27 OS=Homo sapiens GN=RPL27 PE=1 SV=2	0	49.166	67	11	61	11	1	136	15.8	10.56	9320.83	47.36	11	9	cell organization and biogenesis;metabolic process;transport	cytosol;membrane;nucleus;ribosome	RNA binding;structural molecule activity	Pf00467, Pf01777	6155	ENSG00000131469.12	RPL27	17	Ribosome	Cytoplasmic Ribosomal Proteins	0	55.1	29.4117	94.4667	10.1867	129.9	8.65392	67.8667	19.7217	101.267	28.4372	151.4	7.7583	1.71446	2.35753	1.49214	2.23084			41.2	72.9
FALSE	High	Master Protein	P21281	V-type proton ATPase subunit B, brain isoform OS=Homo sapiens GN=ATP6V1B2 PE=1 SV=3	0	49.105	35	10	30	10	1	511	56.5	5.81	4399.66	27.68	9	10	cellular homeostasis;metabolic process;regulation of biological process;response to stimulus;transport	cytoplasm;cytosol;membrane	catalytic activity;nucleotide binding;protein binding;transporter activity	Pf00006, Pf00306, Pf02874	526	ENSG00000147416.10	ATP6V1B2	8	Collecting duct acid secretion; Vibrio cholerae infection; Phagosome; Rheumatoid arthritis; Epithelial cell signaling in Helicobacter pylori infection; Oxidative phosphorylation; Synaptic vesicle cycle; Metabolic pathways; mTOR signaling pathway		0	122.633	14.5916	69.2	64.8235	86.4333	5.49323	104.267	13.7525	154.833	9.07475	62.6667	69.2164	0.564284	0.704811	1.48497	0.601023			133.9	102
FALSE	High	Master Protein	P82663	28S ribosomal protein S25, mitochondrial OS=Homo sapiens GN=MRPS25 PE=1 SV=1	0	49.08	46	8	37	8	1	173	20.1	8.82	5747.29	46.07	8	8	cell organization and biogenesis;metabolic process	membrane;mitochondrion;ribosome	structural molecule activity	Pf05047	64432	ENSG00000131368.7	MRPS25	3			0	93.6333	18.8707	95.9333	42.2386	89.3333	16.1576	111.6	35.0395	118.167	28.027	91.3	25.419	1.02456	0.954076	1.05884	0.8181			74.9	110
FALSE	High	Master Protein	Q9UKM9	RNA-binding protein Raly OS=Homo sapiens GN=RALY PE=1 SV=1	0	49.004	32	11	46	11	1	306	32.4	9.17	7828.44	57.42	11	11	metabolic process;regulation of biological process	nucleus;spliceosomal complex	protein binding;RNA binding	Pf00076, Pf13893, Pf14259	22913	ENSG00000125970.11	RALY	20			0	35.2667	48.656	103.267	17.0031	145.1	15.7192	34.5	35.1443	104.7	16.7553	177.167	7.68641	2.92817	4.11437	3.03478	5.13527			16.1	49.2
FALSE	High	Master Protein	O95816	BAG family molecular chaperone regulator 2 OS=Homo sapiens GN=BAG2 PE=1 SV=1	0	48.984	63	12	29	12	1	211	23.8	6.7	4692.33	26.63	11	11	metabolic process;regulation of biological process	cytosol	enzyme regulator activity;nucleotide binding;protein binding	Pf02179	9532	ENSG00000112208.11	BAG2	6	Protein processing in endoplasmic reticulum		0	158.3	60.3837	96.05	59.6629	80.2	59.4294	190	57.8075	170.7	57.74	104.75	58.0727	0.606759	0.506633	0.898421	0.551316				130.3
FALSE	High	Master Protein	Q14651	Plastin-1 OS=Homo sapiens GN=PLS1 PE=1 SV=2	0	48.902	9	6	51	1	1	629	70.2	5.41	9800.94	61.39	6	6	cell organization and biogenesis;regulation of biological process;transport	cytoplasm;cytoskeleton	metal ion binding;protein binding;structural molecule activity	Pf00036, Pf00307, Pf13202, Pf13405, Pf13499, Pf13833	5357	ENSG00000120756.12	PLS1	3			0	390.4	57.735	669.8	57.735	270.8	57.735	358.7	57.735	502.9	57.735	207.4	57.735	1.71568	0.693648	1.40201	0.578199
FALSE	High	Master Protein	P20290-2	Isoform 2 of Transcription factor BTF3 OS=Homo sapiens GN=BTF3	0	48.823	75	7	28	7	1	162	17.7	7.5	4948.76	32.85	6	7	metabolic process;regulation of biological process;transport	cytosol;nucleus	protein binding;RNA binding	Pf01849	689	ENSG00000145741.15	BTF3	5			0	148.233	38.4135	87.3333	33.1852	84.5	33.257	90.6333	46.1909	114.533	6.60588	74.8333	11.2926	0.589161	0.570047	1.2637	0.825671			193.8	84.4
FALSE	High	Master Protein	P05198	Eukaryotic translation initiation factor 2 subunit 1 OS=Homo sapiens GN=EIF2S1 PE=1 SV=3	0	48.757	36	12	40	12	1	315	36.1	5.08	6163.42	30.87	12	12	cell communication;metabolic process;regulation of biological process;response to stimulus;transport	cytoplasm;cytosol;membrane;nucleus;ribosome	protein binding;RNA binding	Pf00575, Pf07541	1965	ENSG00000134001.12	EIF2S1	14	Influenza A; Measles; Apoptosis; Hepatitis C; RNA transport; Protein processing in endoplasmic reticulum; Herpes simplex infection; Non-alcoholic fatty liver disease (NAFLD)	Brain-Derived Neurotrophic Factor (BDNF) signaling pathway; Translation Factors	0	95.1333	7.78873	107.767	10.5806	82.5667	11.3579	97.2667	26.8179	114.667	17.028	102.667	15.0771	1.1328	0.867905	1.17889	1.05552			101.7	87.1
FALSE	High	Master Protein	Q14165	Malectin OS=Homo sapiens GN=MLEC PE=1 SV=1	0	48.703	26	8	32	8	1	292	32.2	5.41	5963.65	38.93	8	8	metabolic process;transport	endoplasmic reticulum;membrane	protein binding	Pf11721	9761	ENSG00000110917.7	MLEC	12			0	147.75	60.6714	138.25	58.1819	110.55	58.7382	151	58.1061	140.05	58.4373	112.45	57.7946	0.935702	0.748223	0.927483	0.744702				120.2
FALSE	High	Master Protein	P23527	Histone H2B type 1-O OS=Homo sapiens GN=HIST1H2BO PE=1 SV=3	0	48.605	49	7	59	2	1	126	13.9	10.32	9747.71	51.53	7	7	cell organization and biogenesis;metabolic process	chromosome;cytosol;nucleus	DNA binding;protein binding	Pf00125, Pf00808	8348	ENSG00000274641.1	HIST1H2BO	6	Alcoholism; Viral carcinogenesis; Systemic lupus erythematosus		0	63.4667	36.7235	128.4	8.20201	86.9	17.0299	76.2333	20.4943	97.9333	18.019	147.033	21.4851	2.02311	1.36922	1.28465	1.92873			40.5	87.1
FALSE	High	Master Protein	P54727	UV excision repair protein RAD23 homolog B OS=Homo sapiens GN=RAD23B PE=1 SV=1	0	48.584	24	9	49	9	1	409	43.1	4.84	8508.53	59.69	9	9	cell organization and biogenesis;metabolic process;regulation of biological process;response to stimulus	cytoplasm;cytosol;nucleus;proteasome	DNA binding;protein binding	Pf00240, Pf00627, Pf09280, Pf11976, Pf13881	5887	ENSG00000119318.12	RAD23B	9	Protein processing in endoplasmic reticulum; Nucleotide excision repair		0	101.633	3.09951	134.733	17.5213	82.4333	32.71	103.667	26.6464	97.6667	42.2988	79.8333	16.5052	1.32568	0.811086	0.942122	0.770096			98	103.6
FALSE	High	Master Protein	E9PAV3	Nascent polypeptide-associated complex subunit alpha, muscle-specific form OS=Homo sapiens GN=NACA PE=1 SV=1	0	48.515	3	4	46	4	1	2078	205.3	9.58	9553.87	55.76	4	4	metabolic process;regulation of biological process	cytoplasm;nucleus	DNA binding	Pf01849	4666	ENSG00000196531.10	NACA	12			0	134.767	14.398	166.833	45.9434	66.2	41.0318	91.7	13.0347	88.3667	54.1179	52.1	63.2615	1.23794	0.491219	0.96365	0.568157			156.4	118.9
FALSE	High	Master Protein	Q9BWD1	Acetyl-CoA acetyltransferase, cytosolic OS=Homo sapiens GN=ACAT2 PE=1 SV=2	0	48.387	31	6	27	6	1	397	41.3	6.92	4971.11	35.14	5	6	metabolic process	cytoplasm;cytosol;mitochondrion;nucleus	catalytic activity;protein binding	Pf00108, Pf00109, Pf02803	39	ENSG00000120437.8	ACAT2	6	Carbon metabolism; Tryptophan metabolism; Pyruvate metabolism; Fatty acid degradation; Fatty acid metabolism; Metabolic pathways; Butanoate metabolism; Synthesis and degradation of ketone bodies; Lysine degradation; Valine, leucine and isoleucine degradation; Propanoate metabolism; Glyoxylate and dicarboxylate metabolism; Fat digestion and absorption; Terpenoid backbone biosynthesis		0	161	24.9377	122.767	7.33113	106.233	22.4067	134.267	23.3238	181.1	18.5287	94.6333	59.3982	0.762526	0.659834	1.34881	0.704816			179	115
FALSE	High	Master Protein	Q5QNW6-2	Isoform 2 of Histone H2B type 2-F OS=Homo sapiens GN=HIST2H2BF	0	48.083	46	7	59	2	1	134	14.8	10.35	9868.54	54.76	7	7	cell organization and biogenesis	chromosome;cytosol;nucleus	DNA binding;protein binding	Pf00125, Pf00808	440689	ENSG00000203814.6	HIST2H2BF	1			7	60.9333	10.2046	125.333	18.3173	92.4	33.2742	67.1333	24.6128	126.567	12.2057	127.633	11.2063	2.05689	1.51641	1.8853	1.90119			53.9	65.7
FALSE	High	Master Protein	O00148	ATP-dependent RNA helicase DDX39A OS=Homo sapiens GN=DDX39A PE=1 SV=2	0	47.992	29	10	50	2	1	427	49.1	5.68	8986.23	59.46	10	10	metabolic process;regulation of biological process;response to stimulus;transport	cytoplasm;membrane;nucleus;spliceosomal complex	catalytic activity;nucleotide binding;protein binding;RNA binding	Pf00270, Pf00271, Pf14617	10212	ENSG00000123136.14	DDX39A	19			0	176.4	57.735	258	57.735	124.3	57.735	202.7	57.735	212.8	57.735	225.8	57.735	1.46259	0.704649	1.04983	1.11396
FALSE	High	Master Protein	P20674	Cytochrome c oxidase subunit 5A, mitochondrial OS=Homo sapiens GN=COX5A PE=1 SV=2	0	47.979	50	7	40	7	1	150	16.8	6.79	6587.19	46.1	7	7	metabolic process;transport	membrane;mitochondrion	catalytic activity;metal ion binding;protein binding;transporter activity	Pf02284	9377	ENSG00000178741.11	COX5A	15	Oxidative phosphorylation; Cardiac muscle contraction; Parkinson's disease; Non-alcoholic fatty liver disease (NAFLD); Alzheimer's disease; Huntington's disease; Metabolic pathways	Arachidonate Epoxygenase / Epoxide Hydrolase; Electron Transport Chain	0	129.867	29.8856	123.267	19.9023	89.7667	17.5448	90.8333	41.1146	108.867	11.832	57.3667	22.6225	0.949179	0.691222	1.19853	0.63156			163.5	87.4
FALSE	High	Master Protein	P35637	RNA-binding protein FUS OS=Homo sapiens GN=FUS PE=1 SV=1	0	47.834	13	7	46	4	1	526	53.4	9.36	8396.05	60.87	7	7	metabolic process;regulation of biological process;response to stimulus	cytoplasm;nucleus	DNA binding;metal ion binding;protein binding;RNA binding	Pf00076, Pf00641, Pf13893, Pf14259	2521	ENSG00000089280.18	FUS	16	Transcriptional misregulation in cancer	mRNA Processing	3	106.733	16.2122	157.133	32.7091	64.9667	55.3939	95.9333	25.0183	113.3	6.47563	61.9667	47.9171	1.4722	0.608682	1.18103	0.645935			126.7	97.4
FALSE	High	Master Protein	P31350-2	Isoform 2 of Ribonucleoside-diphosphate reductase subunit M2 OS=Homo sapiens GN=RRM2	0	47.785	26	9	31	9	1	449	51.1	6.57	4693.35	29.65	9	9	metabolic process;regulation of biological process	cytosol	catalytic activity;metal ion binding;protein binding	Pf00268	6241	ENSG00000171848.13	RRM2	2		Retinoblastoma (RB) in Cancer; Nucleotide Metabolism; Hepatitis C and Hepatocellular Carcinoma; Fluoropyrimidine Activity	0	88.6333	15.2586	84.9	8.32287	87.9667	10.189	111.167	17.9041	120.333	3.04697	106.967	11.4124	0.957879	0.992478	1.08246	0.962219			87.7	75.6
FALSE	High	Master Protein	P20618	Proteasome subunit beta type-1 OS=Homo sapiens GN=PSMB1 PE=1 SV=2	0	47.737	45	8	39	8	1	241	26.5	8.13	5640.78	35.08	8	7	cell organization and biogenesis;metabolic process;regulation of biological process;response to stimulus;transport	cytoplasm;cytosol;extracellular;nucleus;organelle lumen;proteasome	catalytic activity;protein binding	Pf00227	5689	ENSG00000008018.8	PSMB1	6	Proteasome	Proteasome Degradation	0	164.45	60.3063	100.25	64.2013	93.5	65.9997	158.7	58.4934	187.15	61.2816	96.05	62.8895	0.609608	0.568562	1.17927	0.60523				135.8
FALSE	High	Master Protein	Q13642	Four and a half LIM domains protein 1 OS=Homo sapiens GN=FHL1 PE=1 SV=4	0	47.717	31	8	38	2	1	323	36.2	8.97	6606.63	51.35	8	8	cell differentiation;development;regulation of biological process	cytoplasm;cytosol;membrane;nucleus	metal ion binding;protein binding	Pf00412	2273	ENSG00000022267.16	FHL1	X	Jak-STAT signaling pathway	Notch Signaling Pathway	0	146.2	58.9352	150.6	64.9481	119.1	58.1745	149.35	57.8419	136.6	61.4141	98.2	59.6697	1.0301	0.814637	0.91463	0.657516			128.9
FALSE	High	Master Protein	P26640	Valine--tRNA ligase OS=Homo sapiens GN=VARS PE=1 SV=4	0	47.702	10	11	31	11	1	1264	140.4	7.59	5170.82	34.4	11	11	metabolic process;regulation of biological process	cytoplasm;cytosol;mitochondrion	catalytic activity;nucleotide binding;protein binding	Pf00043, Pf00133, Pf08264, Pf09334, Pf13603	7407; 57176	ENSG00000096171.14; ENSG00000204394.12; ENSG00000226589.9	VARS; VARS2	6; CHR_HSCHR6_MHC_DBB_CTG1; CHR_HSCHR6_MHC_COX_CTG1	Aminoacyl-tRNA biosynthesis	Amino Acid metabolism	0	96.4	5.23628	94.8	7.49391	88.8333	14.4618	83.9667	12.0753	101.933	29.8506	134.1	29.6478	0.983402	0.921508	1.21397	1.59706			100.6	97.8
FALSE	High	Master Protein	Q8WVM8	Sec1 family domain-containing protein 1 OS=Homo sapiens GN=SCFD1 PE=1 SV=4	0	47.637	17	8	21	8	1	642	72.3	6.27	4132.62	36.41	8	8	cell organization and biogenesis;regulation of biological process;response to stimulus;transport	cytoplasm;cytosol;endoplasmic reticulum;Golgi;membrane	protein binding	Pf00995	23256	ENSG00000092108.20	SCFD1	14			0	180.55	57.7365	129.75	62.7972	120.75	67.0846	112.7	67.5407	154.6	62.1577	101.7	57.7916	0.718637	0.66879	1.37178	0.902396			179.8
FALSE	High	Master Protein	Q9Y6M1	Insulin-like growth factor 2 mRNA-binding protein 2 OS=Homo sapiens GN=IGF2BP2 PE=1 SV=2	0	47.573	12	7	60	5	1	599	66.1	8.46	10619.2	66.04	7	7	regulation of biological process;transport	cytoplasm;cytoskeleton;cytosol;nucleus	protein binding;RNA binding;translation regulator activity	Pf00013, Pf00076, Pf13014, Pf13083, Pf13893, Pf14259	10644	ENSG00000073792.15	IGF2BP2	3			0	76.1333	19.4331	83.5667	30.3903	91.5333	2.53952	107.467	17.5112	114.767	9.76684	126.533	23.733	1.09764	1.20228	1.06793	1.17742			62.4	74.2
FALSE	High	Master Protein	P25789	Proteasome subunit alpha type-4 OS=Homo sapiens GN=PSMA4 PE=1 SV=1	0	47.501	44	10	53	10	1	261	29.5	7.72	8227.63	42.1	10	9	metabolic process;regulation of biological process;response to stimulus;transport	cytoplasm;cytosol;nucleus;proteasome	catalytic activity;protein binding	Pf00227, Pf10584	5685	ENSG00000041357.15	PSMA4	15	Proteasome	Exercise-induced Circadian Regulation; Proteasome Degradation	0	124.8	13.2735	104.333	16.7228	79.6667	14.883	132.5	15.299	76.9667	14.324	81.7667	7.19108	0.836004	0.638355	0.580881	0.617107			112.8	117.9
FALSE	High	Master Protein	Q04760	Lactoylglutathione lyase OS=Homo sapiens GN=GLO1 PE=1 SV=4	0	47.496	38	7	70	7	1	184	20.8	5.31	12611.1	77.27	7	7	cell differentiation;metabolic process;regulation of biological process	cytoplasm;cytosol;membrane;nucleus	catalytic activity;metal ion binding	Pf00903, Pf12681, Pf13669	2739	ENSG00000124767.6	GLO1	6	Pyruvate metabolism		0	133.767	6.44141	117.667	15.4866	71.6667	13.7655	121.533	5.66273	91.9667	15.5906	63.4667	6.63326	0.879641	0.535759	0.75672	0.522216			135	124.6
FALSE	High	Master Protein	P42766	60S ribosomal protein L35 OS=Homo sapiens GN=RPL35 PE=1 SV=2	0	47.495	46	10	67	10	1	123	14.5	11.05	10623.4	55.35	9	9	cell organization and biogenesis;metabolic process;transport	cytosol;membrane;ribosome	RNA binding;structural molecule activity	Pf00831	11224	ENSG00000136942.14	RPL35	9	Ribosome	Cytoplasmic Ribosomal Proteins	0	75.6333	16.4164	88.0667	31.9027	126.1	19.7634	63.5	37.3919	113.8	64.5331	132.933	34.336	1.16439	1.66725	1.79213	2.09344			88.4	74.9
FALSE	High	Master Protein	P30084	Enoyl-CoA hydratase, mitochondrial OS=Homo sapiens GN=ECHS1 PE=1 SV=4	0	47.43	35	8	34	8	1	290	31.4	8.07	5299.7	24.34	8	8	metabolic process	mitochondrion;organelle lumen	catalytic activity;protein binding	Pf00378, Pf01343	1892	ENSG00000127884.4	ECHS1	10	Butanoate metabolism; Metabolic pathways; Propanoate metabolism; Valine, leucine and isoleucine degradation; beta-Alanine metabolism; Carbon metabolism; Fatty acid metabolism; Fatty acid degradation; Tryptophan metabolism; Fatty acid elongation; Lysine degradation	Tryptophan metabolism; Fatty Acid Beta Oxidation; Fatty Acid Biosynthesis	0	112.633	19.719	106.967	5.32986	90.3333	0.992201	105.933	8.41493	99.7667	22.8688	84.3667	4.28407	0.949689	0.802012	0.941787	0.796413			130.3	87.7
FALSE	High	Master Protein	Q9NVI7-2	Isoform 2 of ATPase family AAA domain-containing protein 3A OS=Homo sapiens GN=ATAD3A	0	47.423	20	12	29	6	1	586	66.2	9.25	4414.21	29.68	12	12	cell growth;regulation of biological process	membrane;mitochondrion	catalytic activity;nucleotide binding;RNA binding	Pf00004, Pf00910, Pf01078, Pf05707, Pf06745, Pf07728, Pf12037, Pf13207, Pf13401	55210	ENSG00000197785.13	ATAD3A	1			5	115.967	44.7675	125.667	35.0025	126.133	31.6861	182.633	26.6214	135.667	8.27536	113.933	8.21222	1.08364	1.08767	0.742836	0.623836			57.2	155.6
FALSE	High	Master Protein	P14927	Cytochrome b-c1 complex subunit 7 OS=Homo sapiens GN=UQCRB PE=1 SV=2	0	47.37	35	5	43	5	1	111	13.5	8.78	7483.79	53.61	5	5	cell organization and biogenesis;metabolic process;transport	membrane;mitochondrion	catalytic activity;protein binding;transporter activity	Pf02271	7381	ENSG00000156467.9	UQCRB	8	Metabolic pathways; Huntington's disease; Oxidative phosphorylation; Parkinson's disease; Cardiac muscle contraction; Non-alcoholic fatty liver disease (NAFLD); Alzheimer's disease	Electron Transport Chain	0	109.333	19.4938	149	27.7785	84.6	35.4671	118.533	32.8435	93.9333	42.2694	44.6	12.3807	1.3628	0.77378	0.792463	0.376265			87.6	110.2
FALSE	High	Master Protein	Q8WUM4-2	Isoform 2 of Programmed cell death 6-interacting protein OS=Homo sapiens GN=PDCD6IP	0	47.332	17	13	32	13	1	873	96.7	6.52	5063.12	34.85	12	13	cell death;cell organization and biogenesis;regulation of biological process;transport	cytosol;membrane	protein binding	Pf03097, Pf08391, Pf13949	10015	ENSG00000170248.13	PDCD6IP	3			0	92.5667	9.74031	102.133	5.6095	83.1	5.71695	110.867	15.8427	115.433	29.465	95.8667	10.0401	1.10335	0.897731	1.04119	0.864702			90.9	84.5
FALSE	High	Master Protein	P62851	40S ribosomal protein S25 OS=Homo sapiens GN=RPS25 PE=1 SV=1	0	47.294	39	8	98	8	1	125	13.7	10.11	18426.7	111.95	8	8	cell organization and biogenesis;metabolic process;transport	cytosol;nucleus;ribosome	catalytic activity;nucleotide binding;protein binding;RNA binding;structural molecule activity	Pf03297	6230	ENSG00000280831.2; ENSG00000118181.10	RPS25	11; CHR_HG2217_PATCH	Ribosome	Cytoplasmic Ribosomal Proteins	0	71.1667	35.9599	74.0333	32.9792	135.333	9.71228	101.167	18.8145	80.0333	28.1952	138.233	13.0255	1.04028	1.90164	0.791104	1.36639			41.8	88.7
FALSE	High	Master Protein	P09493-10	Isoform 10 of Tropomyosin alpha-1 chain OS=Homo sapiens GN=TPM1	0	47.274	37	12	58	9	1	284	32.8	4.77	8485.89	52.15	12	11	cell organization and biogenesis;cellular component movement;regulation of biological process;response to stimulus	cytoskeleton;cytosol	protein binding;structural molecule activity	Pf00261, Pf12718	7168	ENSG00000140416.19	TPM1	15	Hypertrophic cardiomyopathy (HCM); Adrenergic signaling in cardiomyocytes; Dilated cardiomyopathy; Cardiac muscle contraction; MicroRNAs in cancer	Striated Muscle Contraction	0	164.4	23.1208	172.767	10.0308	96.8333	34.6141	127	27.7198	147.033	28.2116	91.9333	20.576	1.05089	0.589011	1.15774	0.723885			204.9	129.5
FALSE	High	Master Protein	P07602-3	Isoform Sap-mu-9 of Prosaposin OS=Homo sapiens GN=PSAP	0	47.195	23	11	52	11	1	527	58.4	5.14	8150.25	56.02	11	11	cell differentiation;metabolic process;regulation of biological process;response to stimulus;transport	extracellular;membrane;mitochondrion;organelle lumen;vacuole	catalytic activity;enzyme regulator activity;protein binding	Pf02199, Pf03489, Pf05184	5660		PSAP	10			0	135.033	31.6332	121.833	32.9553	66.9	45.1687	104.067	23.9193	106.233	11.4912	65.9333	20.9304	0.902246	0.495433	1.02082	0.633568			183.9	104.8
FALSE	High	Master Protein	Q15008-4	Isoform 4 of 26S proteasome non-ATPase regulatory subunit 6 OS=Homo sapiens GN=PSMD6	0	47.181	24	10	24	10	1	442	51.9	6.74	4308.96	23	10	9	metabolic process;regulation of biological process;response to stimulus;transport	cytosol;extracellular;organelle lumen;proteasome	catalytic activity;enzyme regulator activity;protein binding	Pf01399, Pf10602	9861	ENSG00000163636.10	PSMD6	3		Proteasome Degradation; Parkin-Ubiquitin Proteasomal System pathway	0	171.35	59.0642	119.1	59.6804	127.5	58.7994	175.05	57.9922	123.9	57.7396	83.1	58.6982	0.695069	0.744091	0.707798	0.474722				150
FALSE	High	Master Protein	P63000-2	Isoform B of Ras-related C3 botulinum toxin substrate 1 OS=Homo sapiens GN=RAC1	0	47.069	27	7	39	5	1	211	23.5	8.63	7707.9	65.23	7	6	cell organization and biogenesis;cell proliferation;cellular component movement;coagulation;defense response;metabolic process;regulation of biological process;response to stimulus;transport	cytoplasm;cytosol;membrane	catalytic activity;nucleotide binding;protein binding	Pf00071, Pf08477	5879	ENSG00000136238.17	RAC1	7		VEGFA-VEGFR2 Signaling Pathway; EGF/EGFR Signaling Pathway; Amyotrophic lateral sclerosis (ALS); p38 MAPK Signaling Pathway; AGE/RAGE pathway; TGF-beta Signaling Pathway; Prolactin Signaling Pathway; Wnt Signaling Pathway Netpath; Robo4 and VEGF Signaling Pathways Crosstalk; Leptin signaling pathway; Alpha 6 Beta 4 signaling pathway; Chemokine signaling pathway; MicroRNAs in cardiomyocyte hypertr…	2	128.867	10.2374	79.5333	34.5738	79.6	14.0704	119	20.7832	108.2	10.679	84.9	13.8702	0.617175	0.617693	0.909244	0.713445			140.8	114.7
FALSE	High	Master Protein	P16152	Carbonyl reductase [NADPH] 1 OS=Homo sapiens GN=CBR1 PE=1 SV=3	0	46.998	39	7	24	7	1	277	30.4	8.32	4255.85	28.24	7	7	cell differentiation;metabolic process	cytoplasm;cytosol	catalytic activity	Pf00106, Pf01370, Pf08659, Pf13561	873; 54093	ENSG00000159228.12	CBR1; SETD4	21	Arachidonic acid metabolism; Metabolic pathways; Chemical carcinogenesis; Metabolism of xenobiotics by cytochrome P450	NRF2 pathway	0	147	66.8031	106.2	76.6234	129.55	57.9236	143.4	60.4527	154.75	57.7567	119.15	58.7647	0.722449	0.881293	1.07915	0.830893				97.6
FALSE	High	Master Protein	Q16543	Hsp90 co-chaperone Cdc37 OS=Homo sapiens GN=CDC37 PE=1 SV=1	0	46.963	23	8	44	8	1	378	44.4	5.25	7054.15	55.26	8	8	cell division;metabolic process;regulation of biological process;response to stimulus;transport	cytoplasm;cytosol	catalytic activity;enzyme regulator activity;protein binding	Pf03234, Pf08564, Pf08565	11140	ENSG00000105401.8	CDC37	19	PI3K-Akt signaling pathway	Focal Adhesion-PI3K-Akt-mTOR-signaling pathway; Aryl Hydrocarbon Receptor Pathway; TNF alpha Signaling Pathway; Simplified Interaction Map Between LOXL4 and Oxidative Stress Pathway; Aryl Hydrocarbon Receptor	0	126.567	15.4952	93.8667	15.4299	91.7333	15.3936	97.9667	33.2685	117.267	17.2953	72.5667	18.8809	0.741638	0.724783	1.19701	0.740728			142.6	104.7
FALSE	High	Master Protein	P31949	Protein S100-A11 OS=Homo sapiens GN=S100A11 PE=1 SV=2	0	46.777	38	4	61	4	1	105	11.7	7.12	9716.93	81.57	4	4	regulation of biological process;response to stimulus;transport	cytoplasm;extracellular;nucleus;organelle lumen	metal ion binding;protein binding	Pf00036, Pf01023, Pf13499, Pf13833	6282	ENSG00000163191.5	S100A11	1			0	164.9	27.7265	139.9	23.929	56.0333	58.2949	113.333	30.5389	94.3	28.8371	31.5333	75.6124	0.848393	0.339802	0.832059	0.278235			211.4	120
FALSE	High	Master Protein	P33176	Kinesin-1 heavy chain OS=Homo sapiens GN=KIF5B PE=1 SV=1	0	46.738	14	10	31	10	1	963	109.6	6.51	5269.59	32.43	10	9	cell differentiation;cell organization and biogenesis;cellular component movement;metabolic process;regulation of biological process;transport	cytoplasm;cytoskeleton;cytosol;membrane	catalytic activity;motor activity;nucleotide binding;protein binding	Pf00225, Pf01576, Pf02463, Pf03999, Pf04111, Pf04156, Pf05483, Pf05557, Pf05622, Pf06160, Pf07111, Pf07888, Pf10174, Pf12128, Pf13514, Pf13851, Pf14915	3799	ENSG00000170759.10	KIF5B	10	Dopaminergic synapse; Endocytosis	Insulin Signaling	0	92.7333	37.547	93.9667	27.3454	95.4	13.8202	105.033	25.6988	109.267	27.1879	103.633	32.0757	1.0133	1.02876	1.0403	0.986671			54.4	101.4
FALSE	High	Master Protein	P48735	Isocitrate dehydrogenase [NADP], mitochondrial OS=Homo sapiens GN=IDH2 PE=1 SV=2	0	46.614	21	10	37	10	1	452	50.9	8.69	5734.09	55	9	9	cell organization and biogenesis;metabolic process;regulation of biological process	cytosol;membrane;mitochondrion;organelle lumen	catalytic activity;metal ion binding;nucleotide binding	Pf00180	3418	ENSG00000182054.9	IDH2	15	Carbon metabolism; 2-Oxocarboxylic acid metabolism; Peroxisome; Glutathione metabolism; Citrate cycle (TCA cycle); Metabolic pathways; Biosynthesis of amino acids	TCA Cycle	0	100.533	16.7648	93.7333	18.9196	84.5667	1.75526	106.767	17.0074	129.3	26.4013	85.0333	4.24722	0.932361	0.84118	1.21105	0.796441			100.1	83.9
FALSE	High	Master Protein	O43592	Exportin-T OS=Homo sapiens GN=XPOT PE=1 SV=2	0	46.57	11	9	26	9	1	962	109.9	5.39	4034.72	35.68	9	9	transport	cytoplasm;cytosol;nucleus	protein binding;RNA binding	Pf08389	11260	ENSG00000184575.11	XPOT	12	RNA transport		0	103.333	14.447	91.2333	15.7812	88.8	10.3383	113.033	26.6341	118.667	40.7611	84.9333	14.8671	0.882903	0.859355	1.04984	0.751401			112.3	86.1
FALSE	High	Master Protein	Q00341	Vigilin OS=Homo sapiens GN=HDLBP PE=1 SV=2	0	46.536	11	11	32	11	1	1268	141.4	6.87	4894.52	25.25	11	11	metabolic process;transport	cytoplasm;cytosol;membrane;nucleus	protein binding;RNA binding	Pf00013, Pf13014, Pf14611	3069		HDLBP	2			0	104.267	19.6132	83.8333	12.159	94.8667	16.5815	90.8333	16.3679	140.7	8.47203	85.5	19.6411	0.804028	0.909847	1.54899	0.941284			124.7	83.8
FALSE	High	Master Protein	P51610-4	Isoform 4 of Host cell factor 1 OS=Homo sapiens GN=HCFC1	0	46.528	8	14	45	14	1	2079	213.3	7.33	7415.1	49.86	14	13	cell organization and biogenesis;metabolic process;regulation of biological process;response to stimulus	cytoplasm;membrane;nucleus	catalytic activity;protein binding	Pf01344, Pf13415, Pf13418, Pf13854, Pf13964	3054		HCFC1	X		Mitochondrial Gene Expression	0	104.667	19.3564	96.0667	19.8966	88	17.9556	87.4333	13.0967	133.167	13.1597	90.7	5.35497	0.917834	0.840764	1.52307	1.03736			122.8	82.8
FALSE	High	Master Protein	Q16576	Histone-binding protein RBBP7 OS=Homo sapiens GN=RBBP7 PE=1 SV=1	0	46.061	30	14	40	5	1	425	47.8	5.05	6473.32	43.23	14	14	cell organization and biogenesis;cell proliferation;development;metabolic process;regulation of biological process;response to stimulus	cytosol;nucleus	catalytic activity;protein binding;RNA binding	Pf00400, Pf12265	5931	ENSG00000102054.17	RBBP7	X		Retinoblastoma (RB) in Cancer; Interactome of polycomb repressive complex 2 (PRC2)	6	135.967	27.835	91.9333	12.9877	89.4	12.6586	86.7	35.1652	106.867	22.1256	89.1667	24.5956	0.676146	0.657514	1.2326	1.02845			178.4	123.8
FALSE	High	Master Protein	P63208	S-phase kinase-associated protein 1 OS=Homo sapiens GN=SKP1 PE=1 SV=2	0	46.036	48	8	38	8	1	163	18.6	4.54	6535.07	39.8	8	8	cell organization and biogenesis;cellular homeostasis;metabolic process;regulation of biological process;response to stimulus	cytoplasm;cytosol;nucleus	catalytic activity;protein binding	Pf01466, Pf03931	6500	ENSG00000113558.18	SKP1	5	Herpes simplex infection; Ubiquitin mediated proteolysis; Oocyte meiosis; Protein processing in endoplasmic reticulum; TGF-beta signaling pathway; Cell cycle; Circadian rhythm; Wnt signaling pathway	TNF alpha Signaling Pathway; TGF-beta Signaling Pathway; Notch Signaling Pathway	0	158.067	39.9126	120.433	3.61394	67.3	45.6926	111.267	15.7806	83.1333	21.0561	59.8333	19.1621	0.761915	0.42577	0.747154	0.537747			215.1	90.3
FALSE	High	Master Protein	Q9Y617	Phosphoserine aminotransferase OS=Homo sapiens GN=PSAT1 PE=1 SV=2	0	45.987	29	10	40	10	1	370	40.4	7.66	6940.73	48.84	10	10	metabolic process	cytoplasm;cytosol	catalytic activity	Pf00266	29968	ENSG00000135069.13	PSAT1	9	Glycine, serine and threonine metabolism; Biosynthesis of amino acids; Vitamin B6 metabolism; Metabolic pathways; Carbon metabolism	Trans-sulfuration and one carbon metabolism	0	102.467	21.7643	97.9667	17.0354	82.8333	4.63546	127.5	23.1271	105.367	28.0849	83.8667	11.5582	0.956083	0.808393	0.826405	0.657778			85.4	94.3
FALSE	High	Master Protein	P50502	Hsc70-interacting protein OS=Homo sapiens GN=ST13 PE=1 SV=2	0	45.895	28	11	57	11	1	369	41.3	5.27	10188.4	63.05	11	10	cell organization and biogenesis;metabolic process;regulation of biological process	cytoplasm;cytosol	nucleotide binding;protein binding	Pf00515, Pf13371, Pf13414, Pf13431, Pf13432	6767	ENSG00000100380.13	ST13	22			0	160.633	34.9048	126.267	22.183	62.7	40.3629	101.3	19.7623	93.9333	29.6258	55.1667	45.0884	0.786055	0.39033	0.927279	0.544587			207.7	98.6
FALSE	High	Master Protein	P49588	Alanine--tRNA ligase, cytoplasmic OS=Homo sapiens GN=AARS PE=1 SV=2	0	45.798	14	12	32	12	1	968	106.7	5.53	4200.19	29.86	11	12	metabolic process;regulation of biological process	cytoplasm;cytosol;membrane;mitochondrion	catalytic activity;metal ion binding;nucleotide binding;RNA binding	Pf01411, Pf02272, Pf07973	16	ENSG00000090861.15	AARS	16	Aminoacyl-tRNA biosynthesis		0	117.9	36.7949	94.6333	20.0258	80.6667	18.0372	93.6667	16.9443	130.867	10.0461	82.2667	23.691	0.802658	0.684196	1.39715	0.878292			162.2	75.5
FALSE	High	Master Protein	P23588	Eukaryotic translation initiation factor 4B OS=Homo sapiens GN=EIF4B PE=1 SV=2	0	45.752	12	8	44	8	1	611	69.1	5.73	6643	51.34	8	7	cell organization and biogenesis;metabolic process;regulation of biological process	cytosol	catalytic activity;protein binding;RNA binding	Pf00076, Pf14259	1975	ENSG00000063046.17	EIF4B	12	PI3K-Akt signaling pathway; mTOR signaling pathway; RNA transport; Proteoglycans in cancer	Interferon type I signaling pathways; Focal Adhesion-PI3K-Akt-mTOR-signaling pathway; Translation Factors	0	113.267	32.4918	160.467	29.6767	73.4333	62.1009	73.1333	6.65717	111.4	22.0959	68.2667	43.6966	1.41672	0.648323	1.52325	0.933455			152.8	80
FALSE	High	Master Protein	Q15185	Prostaglandin E synthase 3 OS=Homo sapiens GN=PTGES3 PE=1 SV=1	0	45.476	48	9	51	9	1	160	18.7	4.54	8680.17	59.24	9	9	cell organization and biogenesis;metabolic process;regulation of biological process;response to stimulus	cytoplasm;cytosol;nucleus	catalytic activity;protein binding	Pf04969	10728	ENSG00000110958.15	PTGES3	12	Metabolic pathways; Arachidonic acid metabolism	Aryl Hydrocarbon Receptor Pathway	0	130.233	6.99561	103	22.4032	75.3667	16.6054	130.767	15.6142	95.9	18.9666	64.8	19.2419	0.790888	0.578705	0.733367	0.495539			123.5	126.6
FALSE	High	Master Protein	P00441	Superoxide dismutase [Cu-Zn] OS=Homo sapiens GN=SOD1 PE=1 SV=2	0	45.465	45	9	49	9	1	154	15.9	6.13	8129.99	64.03	8	9	cell organization and biogenesis;cellular component movement;cellular homeostasis;metabolic process;regulation of biological process;response to stimulus;transport	cytoplasm;cytosol;extracellular;membrane;mitochondrion;nucleus;organelle lumen;vacuole	antioxidant activity;catalytic activity;metal ion binding;protein binding	Pf00080	6647	ENSG00000142168.14	SOD1	21	Huntington's disease; Peroxisome; Prion diseases; Amyotrophic lateral sclerosis (ALS); Longevity regulating pathway - multiple species	Vitamin B12 Metabolism; Folate Metabolism; Association Between Physico-Chemical Features and Toxicity Associated Pathways; Amyotrophic lateral sclerosis (ALS); AGE/RAGE pathway; Oxidative Stress; Selenium Micronutrient Network; One carbon metabolism and related pathways; Copper homeostasis; Dopamine metabolism	0	129.433	22.8935	126.233	7.21728	72.8333	42.6614	97.8333	15.668	106.233	15.9594	67.5	26.4713	0.975277	0.562709	1.08586	0.689949			150.2	95.5
FALSE	High	Master Protein	Q7L1Q6-3	Isoform 3 of Basic leucine zipper and W2 domain-containing protein 1 OS=Homo sapiens GN=BZW1	0	45.368	23	14	57	11	1	451	51.2	6.62	9802.61	61.51	13	13	metabolic process;regulation of biological process	cytoplasm;membrane	protein binding;RNA binding	Pf02020	9689	ENSG00000082153.17	BZW1	2			2	111.033	18.4702	110.367	12.654	84.3333	8.97538	121.133	3.43797	98.4667	5.1638	74.7	5.22603	0.993996	0.759532	0.812878	0.616676			95.2	103.7
FALSE	High	Master Protein	Q9UKD2	mRNA turnover protein 4 homolog OS=Homo sapiens GN=MRTO4 PE=1 SV=2	0	45.367	45	10	36	10	1	239	27.5	8.29	6418.06	29	10	9	cell organization and biogenesis;metabolic process	cytoplasm;nucleus	protein binding;RNA binding	Pf00466	51154	ENSG00000053372.4	MRTO4	1			0	97.8	47.0561	113.233	49.1192	85.6333	28.5553	131.733	24.1589	101.033	38.2464	70.5667	13.2287	1.15781	0.875596	0.766953	0.535678			51	99.4
FALSE	High	Master Protein	P48047	ATP synthase subunit O, mitochondrial OS=Homo sapiens GN=ATP5O PE=1 SV=1	0	45.307	41	7	56	7	1	213	23.3	9.96	9870.67	63.15	7	7	cell organization and biogenesis;metabolic process;transport	membrane;mitochondrion;nucleus	catalytic activity;protein binding;transporter activity	Pf00213	539	ENSG00000241837.6	ATP5O	21	Metabolic pathways; Huntington's disease; Alzheimer's disease; Oxidative phosphorylation; Parkinson's disease	Oxidative phosphorylation; Electron Transport Chain	0	124.2	21.7795	94.8	20.0178	91.6	29.7495	122	12.9778	92.9333	14.7603	74.5	8.13826	0.763285	0.73752	0.761749	0.610656			97.2	124.1
FALSE	High	Master Protein	O95202	Mitochondrial proton/calcium exchanger protein OS=Homo sapiens GN=LETM1 PE=1 SV=1	0	45.157	17	10	32	10	1	739	83.3	6.7	5065.5	30.06	10	10	cell organization and biogenesis;cellular homeostasis;transport	membrane;mitochondrion	metal ion binding;protein binding;transporter activity	Pf07766, Pf13833	3954	ENSG00000168924.14	LETM1	4			0	90.5	24.3726	111.6	7.37548	78.8333	18.7953	130.333	25.9546	102.433	37.6117	86.3	23.3102	1.23315	0.871087	0.785934	0.662148			74.7	81.1
FALSE	High	Master Protein	P67775	Serine/threonine-protein phosphatase 2A catalytic subunit alpha isoform OS=Homo sapiens GN=PPP2CA PE=1 SV=1	0	45.117	43	11	24	11	1	309	35.6	5.54	3857.38	20.17	11	10	cell death;cell organization and biogenesis;metabolic process;regulation of biological process;response to stimulus	chromosome;cytoplasm;cytoskeleton;cytosol;membrane;mitochondrion;nucleus	catalytic activity;metal ion binding;protein binding	Pf00149	5515	ENSG00000113575.9	PPP2CA	5	AMPK signaling pathway; Tight junction; Dopaminergic synapse; Hepatitis C; mRNA surveillance pathway; Adrenergic signaling in cardiomyocytes; TGF-beta signaling pathway; Sphingolipid signaling pathway; Long-term depression; Hippo signaling pathway; Chagas disease (American trypanosomiasis); PI3K-Akt signaling pathway; Oocyte meiosis	Association Between Physico-Chemical Features and Toxicity Associated Pathways; Dopamine metabolism; Glycogen Metabolism; TNF alpha Signaling Pathway; Focal Adhesion-PI3K-Akt-mTOR-signaling pathway; Mesodermal Commitment Pathway; Brain-Derived Neurotrophic Factor (BDNF) signaling pathway; Wnt Signaling Pathway and Pluripotency	0	168.2	57.735	189.7	57.735	192	57.735	185.9	57.735	283.8	57.735	180.5	57.735	1.12782	1.1415	1.52663	0.970952				168.2
FALSE	High	Master Protein	Q13561-2	Isoform 2 of Dynactin subunit 2 OS=Homo sapiens GN=DCTN2	0	45.093	26	9	34	9	1	406	44.8	5.17	6477.2	39.03	9	8	cell organization and biogenesis;cell proliferation;regulation of biological process;transport	chromosome;cytoplasm;cytosol;membrane	catalytic activity;motor activity;protein binding	Pf04912	10540	ENSG00000175203.15	DCTN2	12			0	135.667	18.6191	93.8333	49.2603	88.3333	7.87695	97.5	12.9892	97.0667	30.3137	87.5333	22.6748	0.691646	0.651106	0.995556	0.897778			152.3	106.6
FALSE	High	Master Protein	P61106	Ras-related protein Rab-14 OS=Homo sapiens GN=RAB14 PE=1 SV=4	0	45.058	42	8	37	7	1	215	23.9	6.21	5707.22	32.21	8	8	cell organization and biogenesis;defense response;metabolic process;regulation of biological process;response to stimulus;transport	cytosol;endoplasmic reticulum;endosome;Golgi;membrane;vacuole	catalytic activity;nucleotide binding;protein binding	Pf00009, Pf00025, Pf00071, Pf04670, Pf08477	51552	ENSG00000119396.10	RAB14	9	AMPK signaling pathway	Focal Adhesion-PI3K-Akt-mTOR-signaling pathway	0	97.2	34.6069	128.7	44.5102	92.6	19.9731	109.9	3.50997	94.4333	24.456	77.1333	20.5611	1.32407	0.952675	0.859266	0.70185			61.7	101.3
FALSE	High	Master Protein	P62495	Eukaryotic peptide chain release factor subunit 1 OS=Homo sapiens GN=ETF1 PE=1 SV=3	0	45.056	31	13	41	13	1	437	49	5.71	5930.85	36.85	13	12	cell organization and biogenesis;metabolic process;regulation of biological process	cytoplasm;cytosol;nucleus	protein binding;RNA binding	Pf03463, Pf03464, Pf03465	2107	ENSG00000120705.12	ETF1	5	mRNA surveillance pathway	Translation Factors	0	209	57.7579	195.55	58.3083	198.2	57.7797	175.65	59.9794	223.75	57.8026	197.9	57.7948	0.935646	0.948325	1.27384	1.12667				205.6
FALSE	High	Master Protein	Q9H2W6	39S ribosomal protein L46, mitochondrial OS=Homo sapiens GN=MRPL46 PE=1 SV=1	0	44.99	36	9	31	9	1	279	31.7	7.05	4674.05	21.56	9	8	cell organization and biogenesis;metabolic process	membrane;mitochondrion;ribosome	catalytic activity;structural molecule activity	Pf11788	26589	ENSG00000259494.1	MRPL46	15			0	163.05	58.183	128.75	72.6844	105.25	61.9881	171.15	57.7962	140.95	65.3161	90.9	62.2677	0.789635	0.645508	0.823547	0.531113				151.3
FALSE	High	Master Protein	P52597	Heterogeneous nuclear ribonucleoprotein F OS=Homo sapiens GN=HNRNPF PE=1 SV=3	0	44.936	28	8	40	7	1	415	45.6	5.58	6924.53	42.99	8	8	metabolic process;regulation of biological process;response to stimulus	cytosol;membrane;nucleus;spliceosomal complex	protein binding;RNA binding	Pf00076, Pf08080, Pf14259	3185	ENSG00000169813.16	HNRNPF	10		Mecp2 and Associated Rett Syndrome	0	136.5	59.4938	132.3	57.9311	121.25	59.1067	104.7	60.4628	143.05	59.4285	162.25	58.0864	0.969231	0.888278	1.36628	1.54967				156.1
FALSE	High	Master Protein	Q14247	Src substrate cortactin OS=Homo sapiens GN=CTTN PE=1 SV=2	0	44.932	23	11	52	11	1	550	61.5	5.4	8322.06	57.84	11	11	cell organization and biogenesis;cellular component movement;regulation of biological process;transport	cytoplasm;cytoskeleton;cytosol;Golgi;membrane	protein binding	Pf00018, Pf02218, Pf07653, Pf14604	2017	ENSG00000085733.15	CTTN	11	Proteoglycans in cancer; Shigellosis; Tight junction; Bacterial invasion of epithelial cells; Pathogenic Escherichia coli infection	Hepatitis C and Hepatocellular Carcinoma; Pathogenic Escherichia coli infection	0	100.2	6.6057	151.133	23.1877	70.8667	49.0333	87.9333	17.9618	107.667	25.692	82.2	36.0317	1.50832	0.707252	1.22441	0.934799			107.3	94.2
FALSE	High	Master Protein	Q96AE4-2	Isoform 2 of Far upstream element-binding protein 1 OS=Homo sapiens GN=FUBP1	0	44.813	17	15	58	11	1	653	68.6	7.31	8847.74	44.17	15	14	metabolic process;regulation of biological process	nucleus	DNA binding;protein binding;RNA binding	Pf00013, Pf07650, Pf13014	8880	ENSG00000162613.16	FUBP1	1			1	109.767	16.5198	111.667	4.91179	89.4667	26.0565	94.0667	17.0491	106.5	14.4024	88.5333	11.0585	1.01731	0.815062	1.13218	0.941176			126.5	90.5
FALSE	High	Master Protein	A5YKK6	CCR4-NOT transcription complex subunit 1 OS=Homo sapiens GN=CNOT1 PE=1 SV=2	0	44.748	4	9	39	9	1	2376	266.8	7.11	6145.65	50.79	9	9	development;metabolic process;regulation of biological process;response to stimulus	cytoplasm;cytosol;membrane;nucleus	catalytic activity;protein binding;RNA binding;structural molecule activity	Pf04054, Pf12842	23019	ENSG00000125107.17	CNOT1	16	RNA degradation		0	123.633	19.7441	84.4	13.365	81.2	21.6213	123.633	39.096	92.4	17.1109	94.7333	25.2449	0.682664	0.656781	0.747371	0.766244			102.6	117.9
FALSE	High	Master Protein	P35659	Protein DEK OS=Homo sapiens GN=DEK PE=1 SV=1	0	44.728	17	7	38	7	1	375	42.6	8.56	7096.78	53.4	7	6	cell organization and biogenesis;metabolic process;regulation of biological process;response to stimulus	nucleus	DNA binding;protein binding;RNA binding	Pf02037, Pf08766	7913	ENSG00000124795.14	DEK	6			0	126.067	20.9245	122.9	34.3715	82.3667	29.9547	99	16.3583	94.7667	33.0853	74.8333	28.6032	0.974881	0.653358	0.957239	0.755892			156.4	108.5
FALSE	High	Master Protein	Q9Y5B9	FACT complex subunit SPT16 OS=Homo sapiens GN=SUPT16H PE=1 SV=1	0	44.653	13	13	31	13	1	1047	119.8	5.66	4841.88	30.83	13	12	cell organization and biogenesis;metabolic process;regulation of biological process;response to stimulus	chromosome;nucleus	protein binding;RNA binding	Pf00557, Pf08512, Pf08644, Pf14826	11198	ENSG00000092201.9	SUPT16H	14			0	110.967	27.7317	106.367	16.9073	89.2	18.2177	88.8333	6.15991	108.867	15.7331	95.7333	12.914	0.958546	0.803845	1.22552	1.07767			146.5	93.3
FALSE	High	Master Protein	Q06323	Proteasome activator complex subunit 1 OS=Homo sapiens GN=PSME1 PE=1 SV=1	0	44.518	41	11	34	11	1	249	28.7	6.02	5352.51	27.53	11	11	metabolic process;regulation of biological process;response to stimulus;transport	cytoplasm;cytosol;proteasome	enzyme regulator activity;protein binding	Pf02251, Pf02252	5720	ENSG00000092010.14	PSME1	14	Proteasome; Antigen processing and presentation	Proteasome Degradation	0	133.633	26.3563	120.233	21.0372	69.7333	23.4693	105.3	10.7245	106.367	21.7475	64.7	25.7419	0.899726	0.521826	1.01013	0.614435			159.4	93.5
FALSE	High	Master Protein	Q13185	Chromobox protein homolog 3 OS=Homo sapiens GN=CBX3 PE=1 SV=4	0	44.371	51	6	49	5	1	183	20.8	5.33	9329.97	67.4	6	5	cell organization and biogenesis;metabolic process;regulation of biological process	chromosome;membrane;nucleus	protein binding	Pf00385, Pf01393	11335; 90416	ENSG00000122565.18	CBX3; C15orf57; CCDC32	7; 15		Exercise-induced Circadian Regulation	2	132.967	53.756	103.133	18.5002	64.7667	37.1401	90.2667	30.6403	146.733	26.6394	62.1333	31.5226	0.775633	0.487089	1.62555	0.688331			207.8	65.4
FALSE	High	Master Protein	P49207	60S ribosomal protein L34 OS=Homo sapiens GN=RPL34 PE=1 SV=3	0	44.357	49	9	94	9	1	117	13.3	11.47	16273.6	106.05	9	9	cell organization and biogenesis;metabolic process;transport	cytosol;mitochondrion;ribosome	protein binding;RNA binding;structural molecule activity	Pf01199	6164	ENSG00000109475.16	RPL34	4	Ribosome	Cytoplasmic Ribosomal Proteins	0	49.3	29.0394	91.4	43.1329	144.133	19.1937	53.8333	40.3957	102.533	38.5311	158.8	11.1521	1.85396	2.9236	1.90464	2.94985			33.3	60.9
FALSE	High	Master Protein	Q07955	Serine/arginine-rich splicing factor 1 OS=Homo sapiens GN=SRSF1 PE=1 SV=2	0	44.342	42	11	49	11	1	248	27.7	10.36	7393.33	43.52	11	11	cell differentiation;cell organization and biogenesis;metabolic process;regulation of biological process;transport	cytoplasm;nucleus;spliceosomal complex	protein binding;RNA binding	Pf00076, Pf13893, Pf14259	6426	ENSG00000136450.12	SRSF1	17	Spliceosome; Herpes simplex infection	mRNA Processing	0	76.2333	22.9308	100.067	10.0662	90.4667	53.2134	63.2333	23.2646	162.667	22.1436	107.333	31.6486	1.31264	1.18671	2.57248	1.69742			82.9	89.4
FALSE	High	Master Protein	P67936	Tropomyosin alpha-4 chain OS=Homo sapiens GN=TPM4 PE=1 SV=3	0	44.28	40	12	42	9	1	248	28.5	4.69	6439.51	40.61	12	11	cell differentiation;cell organization and biogenesis;cellular component movement	cytoplasm;cytoskeleton;cytosol;membrane	metal ion binding;protein binding;structural molecule activity	Pf00261, Pf12718	7171	ENSG00000167460.14	TPM4	19	Cardiac muscle contraction; Hypertrophic cardiomyopathy (HCM); Dilated cardiomyopathy; Adrenergic signaling in cardiomyocytes	Striated Muscle Contraction	0	104.333	19.6974	144.5	28.367	74.6667	54.0638	118.333	26.0866	100.467	22.6176	57.7	44.8432	1.38498	0.715655	0.849014	0.487606			104.1	83.9
FALSE	High	Master Protein	O43852-3	Isoform 3 of Calumenin OS=Homo sapiens GN=CALU	0	44.229	39	9	32	9	1	323	38	4.63	5320.86	27.87	8	9	metabolic process	endoplasmic reticulum;extracellular;Golgi;membrane;organelle lumen	metal ion binding;protein binding	Pf13499	813	ENSG00000128595.16	CALU	7		NOTCH1 regulation of human endothelial cell calcification	0	121.033	29.581	134.9	34.3347	68.8333	29.567	100.367	8.40797	105.633	34.011	69.1667	46.1004	1.11457	0.568714	1.05247	0.68914			160.3	90.2
FALSE	High	Master Protein	O43795	Unconventional myosin-Ib OS=Homo sapiens GN=MYO1B PE=1 SV=3	0	44.159	9	8	34	8	1	1136	131.9	9.38	4962.34	41.34	8	8	cell organization and biogenesis;cellular component movement;transport	cytoplasm;endosome;membrane	catalytic activity;motor activity;nucleotide binding;protein binding	Pf00063, Pf06017	4430	ENSG00000128641.18	MYO1B	2			0	137.433	24.9852	67.1333	52.5024	91.9	18.2392	106.7	13.4557	125.4	10.7454	71.4667	18.6633	0.488479	0.668688	1.17526	0.669791			125.7	110.5
FALSE	High	Master Protein	A6NHL2	Tubulin alpha chain-like 3 OS=Homo sapiens GN=TUBAL3 PE=1 SV=2	0	44.123	12	7	45	1	1	446	49.9	6.05	7677.23	39.26	7	7	cell organization and biogenesis	cytoplasm;cytoskeleton	catalytic activity;nucleotide binding;structural molecule activity	Pf00091, Pf03953	79861	ENSG00000178462.11	TUBAL3	10	Phagosome; Pathogenic Escherichia coli infection; Apoptosis; Gap junction	Parkin-Ubiquitin Proteasomal System pathway; Pathogenic Escherichia coli infection	0	522	57.735	323.9	57.735	346.9	57.735	328.3	57.735	466.7	57.735	412.3	57.735	0.620498	0.664559	1.42157	1.25586				522
FALSE	High	Master Protein	P61758	Prefoldin subunit 3 OS=Homo sapiens GN=VBP1 PE=1 SV=3	0	44.012	52	11	51	11	1	197	22.6	7.11	8911.58	63.33	10	11	cell organization and biogenesis;metabolic process	cytoplasm;cytosol;nucleus	protein binding	Pf02996	7411		VBP1	X			0	160.367	38.1259	115.833	11.925	70.1	27.1075	92.8667	27.8506	96.9667	24.0986	63.8667	27.2489	0.722303	0.437123	1.04415	0.687724			225.3	103.9
FALSE	High	Master Protein	P61254	60S ribosomal protein L26 OS=Homo sapiens GN=RPL26 PE=1 SV=1	0	43.947	53	11	87	2	1	145	17.2	10.55	14977.2	86.64	11	11	cell organization and biogenesis;metabolic process;regulation of biological process;response to stimulus;transport	cytoplasm;cytosol;membrane;ribosome	protein binding;RNA binding;structural molecule activity	Pf00467	6154	ENSG00000161970.12	RPL26	17	Ribosome	Cytoplasmic Ribosomal Proteins	11	57.1	29.3976	99.9	21.0027	129.1	14.9791	68.9	17.6765	84.3333	19.7142	160.7	15.0112	1.74956	2.26095	1.224	2.33237			37.8	68.3
FALSE	High	Master Protein	O00159	Unconventional myosin-Ic OS=Homo sapiens GN=MYO1C PE=1 SV=4	0	43.904	10	9	42	8	1	1063	121.6	9.41	6610.19	61.61	8	9	cell organization and biogenesis;regulation of biological process;response to stimulus;transport	cytoplasm;cytosol;membrane;nucleus	catalytic activity;motor activity;nucleotide binding;protein binding	Pf00063, Pf06017	4641	ENSG00000197879.14	MYO1C	17		Insulin Signaling	1	101.033	23.6007	96.0667	17.7893	82.0667	32.5398	148.967	46.6833	92.7	14.2628	79.1667	12.6002	0.950841	0.812273	0.622287	0.531439			79.4	97.1
FALSE	High	Master Protein	P13693	Translationally-controlled tumor protein OS=Homo sapiens GN=TPT1 PE=1 SV=1	0	43.85	43	7	36	7	1	172	19.6	4.93	7066.16	40.28	7	7	cell differentiation;cellular homeostasis;regulation of biological process;response to stimulus;transport	cytoplasm;cytosol;endosome;nucleus	metal ion binding;protein binding;RNA binding	Pf00838	7178	ENSG00000133112.16	TPT1	13			0	131.233	27.5708	135.067	27.6663	83.0333	38.2016	90.0667	22.3357	89.7333	22.4087	70.7667	33.8295	1.02921	0.632715	0.996299	0.785714			165.5	93.4
FALSE	High	Master Protein	O43768-4	Isoform 4 of Alpha-endosulfine OS=Homo sapiens GN=ENSA	0	43.835	32	5	58	5	1	140	15.5	8.72	9668.38	56.21	5	5	cell division;regulation of biological process;response to stimulus;transport	cytoplasm	enzyme regulator activity;protein binding	Pf04667	2029		ENSA	1			0	150.7	17.6651	130.767	31.8893	62	56.2293	103.533	14.6537	94.5667	26.251	58.5	29.5371	0.867728	0.411413	0.913393	0.565035			181.4	134
FALSE	High	Master Protein	Q9NRX1	RNA-binding protein PNO1 OS=Homo sapiens GN=PNO1 PE=1 SV=1	0	43.803	40	8	39	8	1	252	27.9	9.73	6844.27	50.78	8	8	metabolic process	cytosol;nucleus	RNA binding	Pf00013	56902	ENSG00000115946.7	PNO1	2			0	179.667	27.411	72	25.4432	68.3	12.395	136.1	7.27518	81.9333	13.978	62	22.4541	0.400742	0.380148	0.602008	0.455547			122.8	207.9
FALSE	High	Master Protein	Q7Z2W9	39S ribosomal protein L21, mitochondrial OS=Homo sapiens GN=MRPL21 PE=1 SV=2	0	43.736	53	8	30	8	1	205	22.8	9.89	4149.38	20.66	8	8	cell organization and biogenesis;metabolic process	membrane;mitochondrion;ribosome	RNA binding;structural molecule activity	Pf00829	219927	ENSG00000197345.12	MRPL21	11	Ribosome		0	299.7	59.7748	179.55	62.4731	131.8	69.2923	249.05	58.8157	184.35	57.7353	155.6	58.9595	0.599099	0.439773	0.740213	0.624774				253.3
FALSE	High	Master Protein	Q9Y2R9	28S ribosomal protein S7, mitochondrial OS=Homo sapiens GN=MRPS7 PE=1 SV=2	0	43.698	38	8	40	8	1	242	28.1	9.99	6731.75	47.22	8	8	cell organization and biogenesis;metabolic process	membrane;mitochondrion;ribosome	RNA binding;structural molecule activity	Pf00177	51081	ENSG00000125445.10	MRPS7	17	Ribosome		0	87.8667	23.2953	123.033	38.8594	92.1	22.5392	109.667	27.651	109.033	24.0263	78.3333	29.8159	1.40023	1.04818	0.994225	0.714286			65.2	93.4
FALSE	High	Master Protein	P46063	ATP-dependent DNA helicase Q1 OS=Homo sapiens GN=RECQL PE=1 SV=3	0	43.571	15	10	41	9	1	649	73.4	7.88	6208.6	46.12	10	10	metabolic process;response to stimulus	chromosome;cytoplasm;membrane;nucleus	catalytic activity;DNA binding;nucleotide binding;protein binding	Pf00270, Pf00271, Pf04851, Pf09382	5965	ENSG00000004700.15	RECQL	12			1	104.967	9.88421	94.4	0.661546	81.8	13.5366	118.4	20.0703	102.2	21.0372	98.2667	9.85658	0.899333	0.779295	0.863176	0.829955			94.2	105.8
FALSE	High	Master Protein	Q14203-4	Isoform 4 of Dynactin subunit 1 OS=Homo sapiens GN=DCTN1	0	43.499	10	7	24	7	1	1253	138.7	5.54	4748.88	27.87	7	7	cell division;cell organization and biogenesis;cellular component movement;metabolic process;regulation of biological process;transport	chromosome;cytoplasm;cytoskeleton;cytosol;membrane	catalytic activity;motor activity;protein binding	Pf00261, Pf01302, Pf04111, Pf05622, Pf05667, Pf06160, Pf08317, Pf12128, Pf12329, Pf12455, Pf13166, Pf13514, Pf15035	1639	ENSG00000204843.12	DCTN1	2			0	107.9	1.98124	86.9667	6.06965	112.233	20.6001	93.4333	18.0419	117.467	9.31638	82	21.517	0.805993	1.04016	1.25722	0.877631			105.5	108.6
FALSE	High	Master Protein	Q13283	Ras GTPase-activating protein-binding protein 1 OS=Homo sapiens GN=G3BP1 PE=1 SV=1	0	43.362	19	7	46	7	1	466	52.1	5.52	7762.02	61.51	7	7	metabolic process;regulation of biological process;response to stimulus;transport	cytoplasm;cytosol;membrane;nucleus	catalytic activity;DNA binding;nucleotide binding;protein binding;RNA binding	Pf00076, Pf02136, Pf13893, Pf14259	10146	ENSG00000145907.14	G3BP1	5			0	125.033	31.0277	103.367	15.2763	83.9	23.7636	86.1	17.3358	109.067	26.918	92.5	8.33415	0.826713	0.671021	1.26674	1.07433			169.5	98.1
FALSE	High	Master Protein	P25788	Proteasome subunit alpha type-3 OS=Homo sapiens GN=PSMA3 PE=1 SV=2	0	43.358	27	7	46	7	1	255	28.4	5.33	7164.66	47.45	7	7	metabolic process;regulation of biological process;response to stimulus;transport	cytoplasm;cytosol;nucleus;proteasome	catalytic activity;nucleotide binding;protein binding	Pf00227, Pf10584	5684	ENSG00000100567.12	PSMA3	14	Proteasome	Proteasome Degradation	0	121.767	18.7622	89.5667	9.82593	89.2667	5.95556	115.367	7.44104	80.2667	13.6591	103.733	28.7208	0.73556	0.733096	0.695753	0.899162			96.6	127.5
FALSE	High	Master Protein	Q8NCW5	NAD(P)H-hydrate epimerase OS=Homo sapiens GN=NAXE PE=1 SV=2	0	43.299	24	6	41	6	1	288	31.7	7.66	6894.48	48.65	6	6	cell organization and biogenesis;metabolic process	cytosol;extracellular;mitochondrion;nucleus;organelle lumen	catalytic activity;metal ion binding;nucleotide binding;protein binding	Pf03853	128240	ENSG00000163382.11	APOA1BP; NAXE	1			0	138.85	60.7739	136.2	59.6647	116.7	58.3929	161.15	57.735	143.85	58.3905	103.25	58.2721	0.980915	0.840475	0.892647	0.640707			165.2	112.5
FALSE	High	Master Protein	P46776	60S ribosomal protein L27a OS=Homo sapiens GN=RPL27A PE=1 SV=2	0	43.242	51	9	65	9	1	148	16.6	11	9293.97	76.47	9	9	cell organization and biogenesis;metabolic process;transport	cytosol;endoplasmic reticulum;membrane;ribosome	protein binding;RNA binding;structural molecule activity	Pf00828	6157	ENSG00000166441.12	RPL27A	11	Ribosome	Cytoplasmic Ribosomal Proteins	0	58.4333	40.5523	78.6	34.453	137.733	26.7082	56.5333	37.6218	105.6	36.78	163.1	7.51092	1.34512	2.3571	1.86792	2.88502			36.4	83.5
FALSE	High	Master Protein	Q5JPE7	Nodal modulator 2 OS=Homo sapiens GN=NOMO2 PE=1 SV=1	0	43.227	9	8	28	8	1	1267	139.4	5.76	5308.95	38.33	8	8	regulation of biological process	endoplasmic reticulum;membrane	protein binding	Pf09430, Pf13620, Pf13715, Pf14686	283820	ENSG00000185164.14	NOMO2	16			0	99.6	17.8173	88.5667	14.7624	100.067	12.6921	93.2667	19.2865	114.267	11.9178	104.167	17.6771	0.889224	1.00469	1.22516	1.11687			96.2	83.8
FALSE	High	Master Protein	P38117	Electron transfer flavoprotein subunit beta OS=Homo sapiens GN=ETFB PE=1 SV=3	0	43.156	27	10	38	10	1	255	27.8	8.1	6561.63	46.11	10	10	metabolic process;transport	cytosol;mitochondrion;organelle lumen	protein binding	Pf01012	2109	ENSG00000105379.9	ETFB	19			0	118.367	10.8775	109.367	13.2207	80.9333	4.3269	104.4	14.0348	103.7	9.35788	83.2333	13.8767	0.923965	0.683751	0.993295	0.797254			125.9	103.5
FALSE	High	Master Protein	Q9Y221	60S ribosome subunit biogenesis protein NIP7 homolog OS=Homo sapiens GN=NIP7 PE=1 SV=1	0	43.118	55	8	27	8	1	180	20.4	8.51	5231.85	41.5	8	8	cell organization and biogenesis	cytosol;nucleus	protein binding;RNA binding	Pf03657	51388	ENSG00000132603.13	NIP7	16			0	63.6667	44.1991	91.3	28.3693	99.1	6.44155	94.6	14.0306	125.467	2.32416	125.867	21.5959	1.43403	1.55654	1.32629	1.33051			31.8	74.1
FALSE	High	Master Protein	P15170-3	Isoform 3 of Eukaryotic peptide chain release factor GTP-binding subunit ERF3A OS=Homo sapiens GN=GSPT1	0	43.094	22	11	31	11	1	637	68.7	5.33	4703.21	25.81	11	11	cell organization and biogenesis;metabolic process	cytosol	catalytic activity;nucleotide binding;protein binding;RNA binding	Pf00009, Pf03143, Pf03144, Pf07145	2935	ENSG00000103342.12	GSPT1	16			0	112.7	20.0868	88.6667	24.2364	91.2667	10.4719	105.567	24.749	116.8	18.7553	85.0667	12.1613	0.786749	0.80982	1.10641	0.80581			136.4	91.3
FALSE	High	Master Protein	Q9Y224	RNA transcription, translation and transport factor protein OS=Homo sapiens GN=RTRAF PE=1 SV=1	0	43.063	43	8	26	8	1	244	28.1	6.65	4873.93	26.12	8	8	metabolic process;regulation of biological process;transport	cytoplasm;cytoskeleton;cytosol;nucleus	protein binding;RNA binding	Pf10036	51637	ENSG00000087302.8	C14orf166; RTRAF	14			0	227.7	62.6011	226.6	58.3407	153.95	62.6506	215.4	57.8067	225.1	58.1929	151.2	58.4728	0.995169	0.676109	1.04503	0.70195				172.6
FALSE	High	Master Protein	Q15233	Non-POU domain-containing octamer-binding protein OS=Homo sapiens GN=NONO PE=1 SV=4	0	43.046	30	14	35	12	1	471	54.2	8.95	5035.22	29.12	13	14	defense response;metabolic process;regulation of biological process;response to stimulus	membrane;nucleus	DNA binding;protein binding;RNA binding	Pf00076, Pf08075, Pf13893, Pf14259	4841	ENSG00000147140.15	NONO	X		mRNA Processing	1	107.033	26.6478	108.6	27.04	93.7667	14.6579	78.3	22.1166	122.367	11.0446	89.9	15.6916	1.01464	0.876051	1.56279	1.14815			139.6	95
FALSE	High	Master Protein	P11766	Alcohol dehydrogenase class-3 OS=Homo sapiens GN=ADH5 PE=1 SV=4	0	42.971	31	10	35	10	1	374	39.7	7.49	5522.22	40.93	10	9	metabolic process;response to stimulus	cytoplasm;cytosol;mitochondrion	catalytic activity;metal ion binding;protein binding	Pf00107, Pf08240	128	ENSG00000197894.10	ADH5	4	Chemical carcinogenesis; Metabolism of xenobiotics by cytochrome P450; Fatty acid degradation; Glycolysis / Gluconeogenesis; Retinol metabolism; Tyrosine metabolism; Metabolic pathways; Drug metabolism - cytochrome P450; Carbon metabolism	Amino Acid metabolism; Folate-Alcohol and Cancer Pathway	0	117.533	16.3845	104	6.66798	86.7	16.5106	106.9	11.7021	105.2	9.60641	79.6667	8.19785	0.884855	0.737663	0.984097	0.745245			132.1	95.7
FALSE	High	Master Protein	P33993	DNA replication licensing factor MCM7 OS=Homo sapiens GN=MCM7 PE=1 SV=4	0	42.923	16	9	27	9	1	719	81.3	6.46	4271.74	28.79	9	8	cell proliferation;metabolic process;regulation of biological process;response to stimulus	chromosome;cytosol;membrane;nucleus	catalytic activity;DNA binding;nucleotide binding;protein binding	Pf00493, Pf07728, Pf14551	4176	ENSG00000166508.17	MCM7	7	Cell cycle; DNA replication	Retinoblastoma (RB) in Cancer; DNA Replication; G1 to S cell cycle control; miRNA Regulation of DNA Damage Response; Cell Cycle	0	156.1	57.9973	101.5	61.0049	132.35	57.9802	133.2	57.8382	130.6	59.7709	146.3	59.3157	0.650224	0.847854	0.98048	1.09835				147.5
FALSE	High	Master Protein	Q9UKY7	Protein CDV3 homolog OS=Homo sapiens GN=CDV3 PE=1 SV=1	0	42.724	31	7	47	7	1	258	27.3	6.4	7527.18	54.61	7	7	cell proliferation	cytoplasm		Pf15359	55573	ENSG00000091527.15	CDV3	3			0	121.633	18.7575	143.5	33.8418	62.8667	62.6169	105.133	22.0024	100.033	31.8279	66.8	36.7825	1.17978	0.516854	0.95149	0.635384			147.8	111.2
FALSE	High	Master Protein	P53992	Protein transport protein Sec24C OS=Homo sapiens GN=SEC24C PE=1 SV=3	0	42.715	8	8	38	8	1	1094	118.2	7.06	6466.57	47.97	8	8	cell organization and biogenesis;regulation of biological process;transport	cytoplasm;cytosol;endoplasmic reticulum;membrane	metal ion binding;protein binding	Pf00626, Pf03154, Pf04503, Pf04652, Pf04810, Pf04811, Pf04815, Pf07223, Pf08033, Pf09606, Pf09770, Pf15449	9632	ENSG00000176986.15	SEC24C	10	Protein processing in endoplasmic reticulum	Sterol Regulatory Element-Binding Proteins (SREBP) signalling	0	92.3667	4.44323	103.767	24.9247	87.5667	16.5829	86.0667	8.22429	111.633	5.65508	118.6	22.0822	1.12342	0.948033	1.29706	1.378			90.2	97.1
FALSE	High	Master Protein	O76094	Signal recognition particle subunit SRP72 OS=Homo sapiens GN=SRP72 PE=1 SV=3	0	42.68	20	11	26	11	1	671	74.6	9.26	3892.57	24.47	11	11	cell organization and biogenesis;response to stimulus;transport	cytoplasm;cytosol;endoplasmic reticulum	protein binding;RNA binding	Pf08492, Pf12569, Pf12895, Pf13424, Pf14559	6731	ENSG00000174780.15	SRP72	4	Protein export		0	119.533	29.8342	83.1333	35.2042	85.1333	22.1797	118.7	30.8354	103.367	24.6885	90.1	29.272	0.695482	0.712214	0.870823	0.759056			86.9	114.1
FALSE	High	Master Protein	P43246	DNA mismatch repair protein Msh2 OS=Homo sapiens GN=MSH2 PE=1 SV=1	0	42.599	13	10	36	10	1	934	104.7	5.77	5534.71	36.74	10	10	cell differentiation;cell organization and biogenesis;metabolic process;regulation of biological process;response to stimulus	membrane;nucleus	catalytic activity;DNA binding;metal ion binding;nucleotide binding;protein binding	Pf00488, Pf01624, Pf05188, Pf05190, Pf05192	4436	ENSG00000095002.13	MSH2	2	Colorectal cancer; Mismatch repair; Platinum drug resistance; Pathways in cancer	Rac1/Pak1/p38/MMP-2 pathway; Mismatch repair	0	97.2	17.0074	97.5667	19.3131	88.1	18.4557	112.6	29.0414	105.1	13.5741	99.4667	16.5358	1.00377	0.906379	0.933393	0.883363			99.6	79.6
FALSE	High	Master Protein	P62805	Histone H4 OS=Homo sapiens GN=HIST1H4A PE=1 SV=2	0	42.538	42	5	36	5	1	103	11.4	11.36	7201.17	44.88	5	5	cell organization and biogenesis;metabolic process;regulation of biological process;response to stimulus	chromosome;extracellular;membrane;nucleus	DNA binding;protein binding;RNA binding	Pf00125, Pf02969, Pf15630	8359; 8361; 8360; 8363; 8365; 8364; 121504; 554313; 8367; 8294; 8366; 8370; 8362; 8368	ENSG00000197061.4; ENSG00000275126.1; ENSG00000273542.1; ENSG00000197238.4; ENSG00000197837.3; ENSG00000276966.2; ENSG00000158406.4; ENSG00000270882.2; ENSG00000274618.1; ENSG00000278637.1; ENSG00000277157.1; ENSG00000278705.1; ENSG00000270276.2; ENSG00000276180.1	HIST1H4A; HIST1H4F; HIST1H4D; HIST1H4J; HIST1H4H; HIST1H4C; HIST4H4; HIST2H4B; HIST1H4E; HIST1H4I; HIST1H4B; HIST2H4A; HIST1H4K; HIST1H4L	6; 12; 1	Viral carcinogenesis; Systemic lupus erythematosus; Alcoholism	Type II interferon signaling (IFNG); Histone Modifications; Gastric Cancer Network 1	0	53.8	39.3512	111.4	22.946	93.5333	10.8518	72.4667	8.42369	95.7667	13.9245	173.067	33.312	2.07063	1.73854	1.32153	2.38822			37.4	77.7
FALSE	High	Master Protein	P49720	Proteasome subunit beta type-3 OS=Homo sapiens GN=PSMB3 PE=1 SV=2	0	42.484	34	5	32	5	1	205	22.9	6.55	5718.63	44.7	5	5	metabolic process;regulation of biological process;response to stimulus;transport	cytoplasm;cytosol;nucleus;proteasome	catalytic activity;enzyme regulator activity;protein binding	Pf00227	5691	ENSG00000275903.2; ENSG00000277791.4	PSMB3	17; CHR_HSCHR17_7_CTG4	Proteasome	Proteasome Degradation	0	106.833	42.0813	98.1667	20.0077	86.1	7.57345	144.933	22.899	72.3333	23.1009	91.6333	6.17561	0.918877	0.805928	0.49908	0.632245			55.2	128
FALSE	High	Master Protein	Q9BUQ8	Probable ATP-dependent RNA helicase DDX23 OS=Homo sapiens GN=DDX23 PE=1 SV=3	0	42.413	11	9	34	9	1	820	95.5	9.55	5792.9	44.99	9	9	cell organization and biogenesis;metabolic process	cytoplasm;nucleus;spliceosomal complex	catalytic activity;DNA binding;nucleotide binding;protein binding;RNA binding	Pf00270, Pf00271, Pf04851	9416	ENSG00000174243.9	DDX23	12	Spliceosome		0	98.0667	33.1246	89.9333	10.3394	82.8333	15.9714	132.067	34.3502	107.667	35.145	89.4333	10.9152	0.917063	0.844663	0.815245	0.677183			68.6	92.7
FALSE	High	Master Protein	Q8IZL8	Proline-, glutamic acid- and leucine-rich protein 1 OS=Homo sapiens GN=PELP1 PE=1 SV=2	0	42.356	8	7	48	7	1	1130	119.6	4.34	8004.76	53.82	7	7	metabolic process;regulation of biological process;response to stimulus	cytoplasm;membrane;nucleus	protein binding;RNA binding	Pf08166, Pf08167	27043	ENSG00000141456.14	PELP1	17			0	99.3333	33.5139	69.7	37.2058	73.6333	20.8727	149.167	31.126	114.1	23.3262	94.0667	0.987765	0.701678	0.741275	0.764916	0.630615			61.2	122.6
FALSE	High	Master Protein	O95881	Thioredoxin domain-containing protein 12 OS=Homo sapiens GN=TXNDC12 PE=1 SV=1	0	42.347	35	6	39	6	1	172	19.2	5.4	7789.35	62.42	6	6	cell differentiation;cellular homeostasis;metabolic process;regulation of biological process	endoplasmic reticulum;organelle lumen	catalytic activity;protein binding	Pf00085, Pf13098, Pf13899	51060	ENSG00000117862.11	TXNDC12	1	Glutathione metabolism		0	139.5	24.9947	132.133	18.0741	62.7	39.8466	110.033	21.4026	94.5667	32.782	61.1333	23.097	0.947192	0.449462	0.859437	0.555589			166	100
FALSE	High	Master Protein	Q16795	NADH dehydrogenase [ubiquinone] 1 alpha subcomplex subunit 9, mitochondrial OS=Homo sapiens GN=NDUFA9 PE=1 SV=2	0	42.238	24	8	38	8	1	377	42.5	9.8	6150.21	36.59	8	8	cell organization and biogenesis;metabolic process;transport	membrane;mitochondrion;nucleus;organelle lumen	catalytic activity;protein binding	Pf01073, Pf01370, Pf05368	4704	ENSG00000139180.10	NDUFA9	12	Parkinson's disease; Non-alcoholic fatty liver disease (NAFLD); Alzheimer's disease; Huntington's disease; Metabolic pathways; Oxidative phosphorylation	Oxidative phosphorylation; Electron Transport Chain	0	92.2667	33.6263	84.4667	6.62384	97.3333	12.9323	139.9	21.0631	102.867	23.8831	83.2333	26.0913	0.915462	1.05491	0.735287	0.594949			56.9	114.9
FALSE	High	Master Protein	B5ME19	Eukaryotic translation initiation factor 3 subunit C-like protein OS=Homo sapiens GN=EIF3CL PE=3 SV=1	0	42.214	14	12	31	12	1	914	105.4	5.64	5238.22	24.5	12	10	metabolic process	cytoplasm	protein binding;RNA binding	Pf01399, Pf05470	728689	ENSG00000205609.12	EIF3CL	16	RNA transport		0	129.7	15.826	84.4333	13.8065	95.8667	9.38244	82.9	25.1562	105.5	4.10439	101.6	5.62662	0.650989	0.739142	1.27262	1.22557			151.6	126.6
FALSE	High	Master Protein	Q9UNX3	60S ribosomal protein L26-like 1 OS=Homo sapiens GN=RPL26L1 PE=1 SV=1	0	41.957	47	10	85	1	1	145	17.2	10.55	14727.4	85.75	10	10	metabolic process	ribosome	RNA binding;structural molecule activity	Pf00467	51121	ENSG00000037241.7	RPL26L1	5	Ribosome		0	318.1	57.735	487.5	57.735	411.1	57.735	325.3	57.735	446.5	57.735	411.6	57.735	1.53254	1.29236	1.37258	1.26529
FALSE	High	Master Protein	P20042	Eukaryotic translation initiation factor 2 subunit 2 OS=Homo sapiens GN=EIF2S2 PE=1 SV=2	0	41.931	28	9	30	9	1	333	38.4	5.8	5016.7	28.82	9	9	cell proliferation;metabolic process;transport	cytoplasm;cytosol;nucleus	metal ion binding;protein binding;RNA binding	Pf01873, Pf04147	8894	ENSG00000125977.6	EIF2S2	20	RNA transport	Brain-Derived Neurotrophic Factor (BDNF) signaling pathway; Translation Factors	0	94.1333	5.93793	127.367	26.6044	78.7	17.1697	111.567	9.34989	90.4	21.4533	97.8333	13.2171	1.35305	0.836048	0.810278	0.876905			99.3	94.9
FALSE	High	Master Protein	P30041	Peroxiredoxin-6 OS=Homo sapiens GN=PRDX6 PE=1 SV=3	0	41.801	60	12	42	12	1	224	25	6.38	6389.15	42.11	12	11	cellular homeostasis;metabolic process;regulation of biological process;response to stimulus;transport	cytoplasm;cytosol;extracellular;membrane;nucleus;organelle lumen;vacuole	antioxidant activity;catalytic activity;protein binding	Pf00578, Pf08534, Pf10417	9588	ENSG00000117592.8	PRDX6	1	Metabolic pathways	NRF2 pathway	0	123.067	15.7635	130.533	27.0155	72.8	12.1463	127.533	2.37358	80.3	34.6195	65.7667	10.3601	1.06067	0.591549	0.629639	0.515682			116.9	107.5
FALSE	High	Master Protein	P09884	DNA polymerase alpha catalytic subunit OS=Homo sapiens GN=POLA1 PE=1 SV=2	0	41.624	8	11	28	11	1	1462	165.8	5.85	4527.69	33.11	11	11	cell organization and biogenesis;cell proliferation;cellular homeostasis;metabolic process;regulation of biological process;response to stimulus	chromosome;cytoplasm;cytosol;nucleus	catalytic activity;DNA binding;metal ion binding;nucleotide binding;protein binding	Pf00136, Pf03104, Pf08996, Pf12254	5422	ENSG00000101868.10	POLA1	X	Metabolic pathways; DNA replication; Pyrimidine metabolism; Purine metabolism	Retinoblastoma (RB) in Cancer; Nucleotide Metabolism; DNA Replication	0	118.367	28.7097	76.6333	11.18	93.2667	8.6936	83.8333	17.4963	130.4	15.1575	97.6	12.8479	0.647423	0.787947	1.55547	1.16421			147.2	80.9
FALSE	High	Master Protein	Q9NYU2	UDP-glucose:glycoprotein glucosyltransferase 1 OS=Homo sapiens GN=UGGT1 PE=1 SV=3	0	41.623	8	11	34	10	1	1555	177.1	5.63	5641.46	40.21	11	11	metabolic process;regulation of biological process;response to stimulus	endoplasmic reticulum;organelle lumen	catalytic activity;protein binding	Pf06427	56886	ENSG00000136731.12	UGGT1	2	Protein processing in endoplasmic reticulum		1	112.367	11.0855	103.333	20.336	82.0667	10.6482	98.1	7.27189	117.433	26.9722	86.7333	10.1763	0.919608	0.730347	1.19708	0.884132			122	98.3
FALSE	High	Master Protein	Q9Y305-4	Isoform 4 of Acyl-coenzyme A thioesterase 9, mitochondrial OS=Homo sapiens GN=ACOT9	0	41.358	25	9	35	9	1	448	50.8	8.53	5544.56	27.87	9	9	metabolic process	mitochondrion;organelle lumen	catalytic activity	Pf03061	23597	ENSG00000123130.16	ACOT9	X			0	117.267	12.5197	99.0667	20.3033	86.1333	9.52956	106.167	14.3645	100.567	22.8237	90.8333	20.8077	0.844798	0.734508	0.947253	0.855573			134.2	108.1
FALSE	High	Master Protein	P00367	Glutamate dehydrogenase 1, mitochondrial OS=Homo sapiens GN=GLUD1 PE=1 SV=2	0	41.262	20	9	25	9	1	558	61.4	7.8	4522.22	24.44	9	8	cell organization and biogenesis;metabolic process;regulation of biological process	cytoplasm;mitochondrion;organelle lumen	catalytic activity;nucleotide binding;protein binding	Pf00208, Pf02812	2746	ENSG00000148672.8	GLUD1	10	Metabolic pathways; Proximal tubule bicarbonate reclamation; Nitrogen metabolism; Carbon metabolism; D-Glutamine and D-glutamate metabolism; Alanine, aspartate and glutamate metabolism; Arginine biosynthesis	Amino Acid metabolism; Urea cycle and metabolism of amino groups	0	113.933	4.23245	101.967	8.58632	88.4	12.485	110.733	11.5918	95.3	13.2068	89.7	11.3816	0.894968	0.775892	0.860626	0.810054			109.4	113.4
FALSE	High	Master Protein	P62244	40S ribosomal protein S15a OS=Homo sapiens GN=RPS15A PE=1 SV=2	0	41.229	58	9	74	9	1	130	14.8	10.13	13049.2	61.24	9	9	cell organization and biogenesis;metabolic process;regulation of biological process;response to stimulus;transport	cytoplasm;cytosol;membrane;mitochondrion;ribosome	protein binding;RNA binding;structural molecule activity	Pf00410	6210	ENSG00000134419.15	RPS15A	16	Ribosome	Cytoplasmic Ribosomal Proteins	0	69.8333	52.4555	69.8333	8.38086	131.767	31.4292	103.367	20.5725	66.9333	9.45061	158.3	9.06655	1	1.88687	0.647533	1.53144			36.1	108.8
[truncated: 2,589 more rows]
[truncated: 36 more columns]

## Sheet: Ribosomal Proteins
Checked	Protein FDR Confidence: Combined	Master	Accession	Description	Exp. q-value: Combined	Sum PEP Score	Coverage [%]	# Peptides	# PSMs	# Unique Peptides	# Protein Groups	# AAs	MW [kDa]	calc. pI	Score MS Amanda 2.0: MS Amanda 2.0	Score Sequest HT: Sequest HT	# Peptides (by Search Engine): MS Amanda 2.0	# Peptides (by Search Engine): Sequest HT	Biological Process	Cellular Component	Molecular Function	Pfam IDs	Entrez Gene ID	Ensembl Gene ID	Gene Symbol	Chromosome	KEGG Pathways	WikiPathways	# Razor Peptides	Avg. Abundance: M - 21% O2	CV: M - 21% O2 (%)	Avg. Abundance: L - 21% O2	CV: L - 21% O2 (%)	Avg. Abundance: H - 21% O2	CV: H - 21% O2 (%)	Avg. Abundance: M - 1% O2	CV: M - 1% O2 (%)	Avg. Abundance: L - 1% O2	CV: L - 1% O2 (%)	Avg. Abundance: H - 1% O2	CV: H - 1% O2 (%)	Ratio: L/M - 21% O2	p-value	Ratio: H/M - 21% O2	p-value	Ratio: L/M - 1% O2	p-value	Ratio: H/M - 1% O2	p-value
[truncated: 81 more rows]
[truncated: 50 more columns]
