# Supplementary material
Source: HighWire-hosted journal article supplement (doi:10.1101/rna.070318.119)
Supplement: Supplemental_Source_Data_for_Figure3.xlsx [file Supplemental_Source_Data_for_Figure3.xlsx]

## Sheet: HEK293
Event	S (bps)	L (bps)	extra	HEK293 21% O2						HEK293 1% O2
				PSI (%)	S (M)	L (M)	T (M)	S+L	(S+L)/T	PSI (%)	S (M)	L (M)	T (M)	S+L	(S+L)/T		Legend
RPL10 e1	183	346	70 292 491 826	76.1364	2.1	6.7	18.2	8.8	0.483516	100		5.5	13.5	5.5	0.407407		S	Short amplicon
RPL10 e2	132	295	60	96.7581	3.9	116.4	168.2	120.3	0.71522	98.0829	3.1	158.6	167.7	161.7	0.964222		L	Long amplicon
RPL10 e3	172	280	67	100		131.4	135.3	131.4	0.971175	100		149	156.7	149	0.950862		T	Total amplification
RPL10A	101	454	70	1.54703	159.1	2.5	165.4	161.6	0.977025	0	160.4		160.4	160.4	1		M	molarity
RPL11	121	124	63 150	100		92.5	121.1	92.5	0.763832	100		94.6	122.9	94.6	0.769731		extra	predicted amplicons that were not the most predominant or unpredicted amplicons
RPL12	130	229	75	100		94.5	105.1	94.5	0.899144	100		101.8	113.9	101.8	0.893766		PSI	Percent Splicing Index: (L/(S+L))*100
RPL13 e1		225		100		152.3	152.3	152.3	1	100		13	13	13	1		(S+L)/T	represents the relative abundance of most predominant short and long variants out of total amplification
RPL13 e2	106	163		100		170.7	170.7	170.7	1	100		131.5	131.5	131.5	1
RPL13A		204		100		49.7	49.7	49.7	1				0				For Figure 3
RPL14	104	215	68	0.798005	198.9	1.6	212.3	200.5	0.944418	1.1544	137	1.6	148	138.6	0.936486
RPL15 e1	324	337	98 255 302 448 753	83.2636	4	19.9	46.3	23.9	0.516199	82.6347	2.9	13.8	26.8	16.7	0.623134
RPL15 e2	102	158	72 230	5.60606	62.3	3.7	78.1	66	0.84507	5.65611	41.7	2.5	51.6	44.2	0.856589
RPL15 e3	172	293	237 262	100		185.8	189.3	185.8	0.981511	100		154.9	154.9	154.9	1
RPL15 e4		284	70	100		172.6	182.5	172.6	0.945753	100		140.1	149.3	140.1	0.938379
RPL17 e1	165	206	69	100		135.1	151.4	135.1	0.892338	100		88.6	99.2	88.6	0.893145
RPL17 e2	175	192	68 222	40.0438	27.4	18.3	60	45.7	0.761667	26.1838	26.5	9.4	49.7	35.9	0.722334
RPL17 e3	191	208	66 250	23.2779	64.6	19.6	117.6	84.2	0.715986	21.9762	45.8	12.9	75.2	58.7	0.780585
RPL17 e4	151	302	65 133 412 448	88.4762	12.1	92.9	149.3	105	0.703282	92.1387	6.8	79.7	137	86.5	0.631387
RPL17 e5	126		60 71	0	72.3		101.2	72.3	0.714427	0	39.3		39.3	39.3	1
RPL18 e1		201	70	100		39.1	62.1	39.1	0.62963	100		33.6	51.2	33.6	0.65625
RPL18 e2	165	173		100		192.7	192.7	192.7	1	100		190	190	190	1
RPL18 e3	110	633	62	0	133.3		164.1	133.3	0.81231	0	130.2		130.2	130.2	1
RPL18 e4	100	591	66	0	168.8		184.5	168.8	0.914905	0	159.9		171.5	159.9	0.932362
RPL21	162	224	60 66	100		107.3	107.3	107.3	1	100		106.1	114.7	106.1	0.925022
RPL22	221	238	71	100		135.1	137.3	135.1	0.983977	100		129.3	129.3	129.3	1
RPL22L1	161	228	66 285 329	15.6504	83	15.4	120	98.4	0.82	30.82	73.4	32.7	131.9	106.1	0.804397
RPL28	174	368		0	149.2		149.2	149.2	1	0	142.9		142.9	142.9	1
RPL3 e1	166	346	69	0	93		104.4	93	0.890805	0	80.2		87.2	80.2	0.919725
RPL3 e2			60 76 252				86.1						87.1
RPL31 e1	140	418	61	0	189.4		197.7	189.4	0.958017	0	181.2		190	181.2	0.953684
RPL31 e2	141	171	76 223 810 1040	15.5488	27.7	5.1	52.6	32.8	0.623574	12.1622	13	1.8	35.8	14.8	0.413408
RPL32	104	203	60 72	0	87.6		110.6	87.6	0.792043	0	76.7		79.7	76.7	0.962359
RPL38 e1	92	127	182	45.3659	33.6	27.9	66.3	61.5	0.927602	51.3652	28.5	30.1	62.9	58.6	0.931638
RPL38 e2	102	273	61 69	0	197.9		205.1	197.9	0.964895	0	178.9		188.2	178.9	0.950584
UBA52	112	134	65 184	4.89583	91.3	4.7	127.2	96	0.754717	4.52261	76	3.6	112.5	79.6	0.707556
RPL41	95	210		0	72		72	72	1	0	62.3		62.3	62.3	1
RPL6 e1	172	253	66 73	0	184.7		192.4	184.7	0.959979	0	149.8		160.1	149.8	0.935665
RPL6 e2	204	380	67	0	88.2		95.7	88.2	0.92163	0	69.5		75.6	69.5	0.919312
RPL7L1 e1	134	240	63 279	74.5152	27.6	80.7	130.2	108.3	0.831797	70.6553	30.9	74.4	136.6	105.3	0.770864
RPL7L1 e2	236	346	70 81 473	97.2868	2.8	100.4	118.4	103.2	0.871622	97.0856	3.2	106.6	131.8	109.8	0.83308
RPL7L1 e3	217	333	61 248	0	51.9		71.7	51.9	0.723849	0	56		77.4	56	0.723514
RPL9 e1	111	195	67 92	0	116		137.2	116	0.845481	0	137.1		166.2	137.1	0.82491
RPL9 e2	100	612	93	0	227.7		231.6	227.7	0.983161	0	291.3		293.4	291.3	0.992843
RPL9 e3	149	208	62	100		146.6	154.4	146.6	0.949482	100		165.8	179.3	165.8	0.924707
RPLP0 e1	148	208	62 345 569 694 984	20	8	2	27.7	10	0.361011	0	7.2		7.2	7.2	1
RPLP0 e2	166	352	64 544 653	84.7896	18.8	104.8	142.9	123.6	0.864941	86.5008	17.9	114.7	152.2	132.6	0.871222
RPLP1	134	209	62	94.3695	7.1	119	156.3	126.1	0.806782	100		73.5	73.5	73.5	1
RPS14	129		68	0	139.4		145.3	139.4	0.959394	0	133.5		137.8	133.5	0.968795
RPS15A e1	100	166	61 217	3.77171	193.9	7.6	212.3	201.5	0.949129	4.43801	198.1	9.2	213.9	207.3	0.969144
RPS15A e2	117	214	72 79	0	148.1		159	148.1	0.931447	0	149.8		164.6	149.8	0.910085
RPS16 e1	115	166	62 234	94.5763	8	139.5	159.1	147.5	0.92709	94.8061	7.1	129.6	138.9	136.7	0.984161
RPS16 e2	110	205	62 69	0	126.5		149.7	126.5	0.845023	0	130.7		156.1	130.7	0.837284
RPS18	127	285	68	0	186.3		198.4	186.3	0.939012	0	179.9		200.8	179.9	0.895916
RPS2	291	397	63	0	149.7		149.7	149.7	1	0	152.7		169.4	152.7	0.901417
RPS21 e1	95	187	65	1.41999	180.5	2.6	205.3	183.1	0.891866	1.61383	170.7	2.8	202.4	173.5	0.857213
RPS21 e2	102	496	70	0	173.8		176.6	173.8	0.984145	0	174.5		174.5	174.5	1
RPS24 e1	104	122	63	2.39521	179.3	4.4	183.7	183.7	1	2.73647	163.5	4.6	171.4	168.1	0.980747
RPS24 e2	112	134	61 152	42.3077	69	50.6	160.3	119.6	0.746101	56.5134	45.4	59	134.2	104.4	0.777943
RPS27A	95	194	68	0	187.3		192.2	187.3	0.974506	0	177.3		183.1	177.3	0.968323
RPS3 e1	347	378	60 78 108	0	57.8		136.2	57.8	0.424376	0	63.7		79.9	63.7	0.797247
RPS3 e2	108	156		0	176.9		176.9	176.9	1	0	186.9		186.9	186.9	1
RPS3 e3	119	250	64 71	100		161.4	170.5	161.4	0.946628	100		178.1	187.4	178.1	0.950374
RPS3A	208	396	61	100		143.2	157.8	143.2	0.907478	100		135.6	154.9	135.6	0.875403
RPS4Y1	101	558	64				0						1.7
RPS9 e1	100	287	459	85.5204	16	94.5	115	110.5	0.96087	89.4898	10.3	87.7	99.9	98	0.980981
RPS9 e2	194		65	0	146.4		165.2	146.4	0.886199	0	140.4		157.6	140.4	0.890863
RPS9 e3	215	305	64 467	43.7637	25.7	20	104.6	45.7	0.436902	17.931	35.7	7.8	95.2	43.5	0.456933
RPSA	185	200	62	0	5.6		29.4	5.6	0.190476	0	113.5		127.3	113.5	0.891595
