# Supplementary material
Source: HighWire-hosted journal article supplement (doi:10.1101/rna.070318.119)
Supplement: Supplemental_Source_Data_for_Figure4.xlsx [file Supplemental_Source_Data_for_Figure4.xlsx]

## Sheet: Cancer Cell Lines
Event	S (bps)	L (bps)	extra	HEK293 21% O2						HEK293 1% O2						U87MG 21% O2						U87MG 1% O2						U87MG Spheroid						HCT116 21% O2						HCT116 1% O2						HCT 116 Spheroid
				PSI (%)	S (M)	L (M)	T (M)	S+L	(S+L)/T	PSI (%)	S (M)	L (M)	T (M)	S+L	(S+L)/T	PSI (%)	S (M)	L (M)	T (M)	S+L	(S+L)/T	PSI (%)	S (M)	L (M)	T (M)	S+L	(S+L)/T	PSI (%)	S (M)	L (M)	T (M)	S+L	(S+L)/T	PSI (%)	S (M)	L (M)	T (M)	S+L	(S+L)/T	PSI (%)	S (M)	L (M)	T (M)	S+L	(S+L)/T	PSI (%)	S (M)	L (M)	T (M)
RPL11	121	124	63 150	100		92.5	121.1	92.5	0.763832	100		94.6	122.9	94.6	0.769731	100		85.2	107.2	85.2	0.794776	100		142.7	175.5	142.7	0.813105	100		144.4	180.6	144.4	0.799557	100		149.7	182.9	149.7	0.81848	100		142.3	178.9	142.3	0.795416	100		153.6	204.4
RPL12	130	229	71	100		94.5	105.1	94.5	0.899144	100		101.8	113.9	101.8	0.893766	100		92	100.9	92	0.911794	100		122.5	132.8	122.5	0.92244	100		110.2	118.8	110.2	0.927609	100		133.3	142.4	133.3	0.936096	100		131.6	141.1	131.6	0.932672	100		141	150.3
RPS27A	95	194	66 130 273	0	187.3		192.2	187.3	0.974506	0	177.3		183.1	177.3	0.968323	0	116.1		122.2	116.1	0.950082	0	64.3		72	64.3	0.893056	0	235.4		239	235.4	0.984937	0	236.9		240.6	236.9	0.984622	0	230.3		235.7	230.3	0.97709	0	242.1		245.4
RPS3A	208	396	62 475 595	100		143.2	157.8	143.2	0.907478	100		135.6	154.9	135.6	0.875403	100		160.8	162.6	160.8	0.98893	100		145.2	148.1	145.2	0.980419				0			100		113.9	118.6	113.9	0.960371	100		138.6	145.7	138.6	0.95127	100		154.9	161.4
RPSA	185	200	60	0	5.6		29.4	5.6	0.190476	0	113.5		127.3	113.5	0.891595	0	215.4		233.4	215.4	0.922879	0	207		225	207	0.92	0	206		225.7	206	0.912716	0	223.4		236.7	223.4	0.943811	0	221.9		235.2	221.9	0.943452	0	231.1		248.4
RPL10 e1	183	346	65 259 291 437 492 608 736 861 1374	76.1364	2.1	6.7	18.2	8.8	0.483516	100		5.5	13.5	5.5	0.407407			2.7	13.2	2.7	0.204545				8.7			65.5172	2	3.8	22.4	5.8	0.258929			1.8	8.4	1.8	0.214286	100		7.4	26.6	7.4	0.278195	66.9811	3.5	7.1	28.4
RPL17 e2	175	192	63 234 620	40.0438	27.4	18.3	60	45.7	0.761667	26.1838	26.5	9.4	49.7	35.9	0.722334	29.3785	37.5	15.6	73.3	53.1	0.72442	32.9519	29.3	14.4	61	43.7	0.716393	25.6818	32.7	11.3	64.7	44	0.680062	32.5203	16.6	8	36.8	24.6	0.668478	33.8789	40.4	20.7	87.4	61.1	0.699085	19.3122	30.5	7.3	56.9
RPL22L1	161	228	66 285 333 367 399	15.6504	83	15.4	120	98.4	0.82	30.82	73.4	32.7	131.9	106.1	0.804397	0	97.7		97.7	97.7	1	0	89		89	89	1	2.38411	73.7	1.8	80.5	75.5	0.937888	0	91.1		91.1	91.1	1	0	89.6		89.6	89.6	1	0	87.4		87.4
RPS9 e3	215	305	64 206 467 667	43.7637	25.7	20	104.6	45.7	0.436902	17.931	35.7	7.8	95.2	43.5	0.456933				53.9			22.9287	40	11.9	56.5	51.9	0.918584	7.7728	61.7	5.2	70.4	66.9	0.950284	27.4363	48.4	18.3	73.6	66.7	0.90625	0	10.3		10.3	10.3	1	5.17241	88	4.8	97.3
RPS24 e2	112	134	61 152 188	42.3077	69	50.6	160.3	119.6	0.746101	56.5134	45.4	59	134.2	104.4	0.777943	0	104.3		106.2	104.3	0.982109	0	28.5		28.5	28.5	1	89.7959	8.5	74.8	91.6	83.3	0.909389	4.24469	76.7	3.4	92.1	80.1	0.869707	7.35651	114.6	9.1	134.7	123.7	0.918337	71.138	52.5	129.4	209.2
[truncated: 22 more columns]
