# Supplementary material
Source: HighWire-hosted journal article supplement (doi:10.1101/rna.070318.119)
Supplement: Supplemental_Source_Data_for_Figure7.xlsx [file Supplemental_Source_Data_for_Figure7.xlsx]

## Sheet: RPS24 in Human Prostate Tumors
	For Figure 6: Panel II (Origene TissueScan HPRT102)										For Figure 6: Panel III (Origene TissueScan HPRT103)
	Sample ID	Short (112)	Long (137)	Extra-Long (163)	Total	PSI (L/(S+L)*100)	PSI (XL/(L+XL)*100)	CAIX Ct			Sample ID	Short (112)	Long (137)	Extra-Long (163)	Total	PSI (L/(S+L)*100)	PSI (XL/(L+XL)*100)	CAIX Ct
Normal	RN00003508	3	219	166.9	425.36	98.6486	43.2495	32.59		Normal	RN00003424	2.4	75.7741	36.6577	132.471	96.9299	32.6044	31.6
	RN00003509	5.4	220.4	164	409.317	97.6085	42.6639	32.24			RN00003431	4.6	92.2359	47.5202	163.656	95.2497	34.0022	31.14
	RN0000350A	4.9	285.1	85.9	413.869	98.3103	23.1536	31.02			RN0000173D	2.8	105.457	57.1678	176.683	97.4136	35.1531	32.11
	RN0000350B	4.3	254.7	146.7	440.325	98.3398	36.5471	31.29			RN00001B87	5.5	123.13	44.0777	184.743	95.7242	26.3611	32.74
	RN0000350C	5.9	254.2	92.6	392.508	97.7316	26.7013	31.72			RN000010F0	1.8			1.8	N/A	N/A	32.33
	RN0000350D	8.6	243.6	94.9	395.582	96.59	28.0355	31.73			RN0000347B	0	136.817	35.2731	181.799	100	20.4969	33.08
	RN0000350F	2.1	260.3	98.3	382.01	99.1997	27.4122	31.25			RN00003489	0	108.295	40.5306	158.363	100	27.2336	31.58
	RN00003512	3.6	126.8	67	209.275	97.2393	34.5717	31.34			RN000015FA	2.2	116.019	25.1611	155.326	98.139	17.8221	32.47
Stage II	RN00003173	4	251.9	101.5	385.734	98.4369	28.721	32.4			RN00003D59	2.6	124.276	71.1098	214.108	97.9507	36.3946	32.75
	RN00003174	5	239.9	89.2	377.512	97.9584	27.1042	32.35		Stage II	FR000045DF	2.9	166.927	67.7595	249.191	98.2924	28.8724	33.2
	RN00003175	6	248.6	85.6	366.729	97.6434	25.6134	32.95			FR0001874D	0	139.339	81.5042	225.677	100	36.906	32.52
	RN00003176	6.1	300.1	114.4	453.077	98.0078	27.5995	33.12			FR0002FCDD	20.2	180.357	35.3879	245.237	89.928	16.4027	34.66
	RN00003177	15.3	223.3	97.2	379.165	93.5876	30.3276	33.39			FR00047420	6.8	103.785	38.3776	159.874	93.8509	26.9956	34.66
	RN0000317A	9.5	247.4	94.9	368.462	96.3021	27.7242	34.06			FR0003AE6E	5.8	88.6352	48.0455	152.189	93.8582	35.1516	33.6
	RN0000317C	10.4	197.2	87.8	325.687	94.9904	30.807	32.13			SX0001D2D3	7.4	113.423	64.0418	196.015	93.8753	36.087	29.85
	RN0000317E	10	196.1	88.8	317.327	95.148	31.1688	32.13			RN0000314F	13.5	130.216	52.2723	213.862	90.6064	28.6443	26.76
	RN0000317F	51.8	156.9	146.4	398.323	75.1797	48.269	34.24			RN00003153	9.3	127.515	70.5408	230.91	93.2025	35.6165	26.96
	RN00003180	4.6	225.9	84.3	341.933	98.0043	27.176	32.63			SX0001D2E4	4.3	132.618	75.9952	224.43	96.8594	36.4287	27.86
	RN00003181	2.2	257.1	78.3	359.621	99.1516	23.3453	32.2			SX0001D2E6	4.2	104.415	34.327	158.185	96.1331	24.7416	28.28
	RN00003182	0	246.7	88.2	354.912	100	26.3362	32.18			SX0001D431	3	147.818	48.0157	207.594	98.0109	24.5186	29.88
	RN00003183	14.8	263.3	76.2	394.677	94.6782	22.4448	32.88			SX0001D438	6.7	159.4	77.6187	255.937	95.9663	32.7479	30.72
	RN00003184	0	283.4	88.9	383.465	100	23.8786	33.23			SX0001D43C	22.3	89.6877	43.9717	182.8	80.0871	32.8983	25.74
	RN00003188	8.6	230.5	102.6	377.852	96.4032	30.8016	31.85			SX0001D422	23.8	119.333	61.7234	251.728	83.3721	34.0908	26.67
	RN00003189	2.8	261.8	94.6	378.561	98.9418	26.5432	32.14			SX0001D426	11.5	113.147	53.362	196.426	90.7739	32.0476	26.45
	RN0000318B	21.1	251.1	110.6	425.348	92.2483	30.5778	33.33			SX0001D42B	3.7	98.5013	35.5123	145.873	96.3797	26.499	28.36
	RN0000318C	27.6	235.5	88.3	405.753	89.5097	27.2699	33.57			SX0001D42C	3.8	105.605	57.2857	180.839	96.5267	35.1682	29.81
	RN0000318D	5	267.4	87.9	386.983	98.1645	24.7397	32.84			SX0001D42D	5.2	99.2799	34.673	148.836	95.023	25.8844	26.47
	RN0000318E	60.5	159.4	71.5	344.629	72.4875	30.9658	33.15		Stage III	FR0003567D	2.8	123.844	41.8651	172.993	97.7891	25.2641	33.96
	RN00003191	13.9	138.1	68	234.516	90.8553	32.9937	32.91			RN000030E1	7.5	174.7	59.9507	249.811	95.8837	25.5489	33.21
	RN00003192	4.6	269.6	83.8	369.217	98.3224	23.7125	33.81			RN0000314C	33.4	90.0685	16.5282	166.426	72.9486	15.5053	33.25
Stage III	RN00003178	5	236.2	90.4	351.884	97.927	27.6791	32.14			RN0000314D	4.1	141.898	81.0524	237.544	97.1917	36.3545	33.37
	RN00003179	11	235.6	89.5	356.579	95.5393	27.53	33.1			RN0000314E	10.4	145.583	43.1106	210.921	93.3326	22.8469	35.12
	RN0000317B	6.7	269.6	107	397.605	97.5751	28.4121	33.98			RN00003152	31.2	134.244	25.9942	220.758	81.1416	16.2223	34.11
	RN00003185	8.4	289	97.2	409.795	97.1755	25.1683	32.98			SX0001D2E0	23.2	116.473	34.9181	200.823	83.3898	23.0648	34.7
	RN00003187	2.7	281.7	76.6	378.814	99.0506	21.3787	31.2			SX0001D2E3	5.5	163.013	39.1589	234.126	96.7362	19.369	37.62
	RN0000318A	23.3	261.4	126.9	433.798	91.8159	32.6809	33.31			SX0001D2DA	83.3	116.87	34.2639	246.507	58.3855	22.6712	35
	RN0000318F	58.5	194.9	82.3	405.433	76.914	29.6898	33.28			SX0001D2E2	4.4	96.9118	23.9258	136.019	95.657	19.8	34.79
	RN00003190	9	267.2	109.5	398.49	96.7415	29.0682	32.95			SX0001D2D4	3.7	102.844	30.2248	141.677	96.5272	22.7137	33.61
	RN00003198	38.3	251.7	72.4	411.747	86.7931	22.3388	33.97			SX0001D2F2	8.6	166.789	39.1958	231.2	95.0966	19.0285	36.44
	RN00002D6F	0	257.9	92.8	372.192	100	26.4614	32.43			SX0001D2F1	7.9	104.485	29.8003	153.484	92.9706	22.1918	33.77
	RN00003199	15.3	228.3	98.6	358.196	93.7192	30.1621	32.86			SX0001D2F0	7.3	138.273	42.7131	205.006	94.9853	23.6002	32.65
Stage IV	RN0000317D	43.3	181.5	74.2	345.668	80.7384	29.0184	34.87			SX0001D2EF	6.5	162.941	69.8869	251.175	96.1639	30.0165	33.71
	RN00003186	13.9	251.9	105.6	389.849	94.7705	29.5385	34.31			SX0001D305	9.8	115.245	37.4899	174.085	92.1628	24.5457	32.05
Stage Not Reported	RN00003193	80.2	202.2	77.6	441.055	71.6006	27.7341	35.18			SX0001D2E7	8.4	144.027	30.8972	199.017	94.4892	17.6632	25.85
	RN00003194	17.4	289.7	127	454.85	94.3341	30.4776	35.11			SX0001D425		8.70294		8.70294	100	0	N/A
	RN00003195	3.3	302.7	98.4	420.623	98.9216	24.5325	32.41			SX0001D429	12.2	108.181	34.4152	190.976	89.8655	24.1348	25.59
	RN00003196	3.5	478.3	66.6	561.254	99.2736	12.2224	34.39		Stage IV	FR00047920	2.1	151.351	35.6371	198.75	98.6315	19.0585	29.08
	RN00003197	6.9	288	113.8	421.054	97.6602	28.3225	32.82			SX0001D43F	11.2	93.7267	21.8446	144.201	89.3259	18.9014	26.18
