# Supplementary material
Source: HighWire-hosted journal article supplement (doi:10.1101/rna.070318.119)
Supplement: Supplemental_Table_1.pdf [file Supplemental_Table_1.pdf]

**Table S1. Primers used in all experiments**

| <b>Primers for Figure 2A</b>            |                                    |                                    |
|-----------------------------------------|------------------------------------|------------------------------------|
| Target                                  | Forward                            | Reverse                            |
| APAF-1                                  | TAGAACCAGAGGTGGGGAGTC              | TCAACCATGAGCCAAGCCTTT              |
| XIAP                                    | TGCTTTAGGTGAAGGTGAT                | TTCACTAGATCTGCAACCAG               |
| GAPDH                                   | TCGACAGTCAGCCGCATCTTCTTT           | ACCAAATCCGTTGACTCCGACCTT           |
| $\beta$ -Actin                          | CTCGCCTTTGCCGATCC                  | AACATGATCTGGGTCATCTTCTC            |
| <b>Primers for Figure 2B</b>            |                                    |                                    |
| Target                                  | Forward                            | Reverse                            |
| APAF-1                                  | TAATTCCCGGTGGAAAACCTCC             | TCAACCATGAGCCAAGCCTTT              |
| XIAP                                    | TGCTTTAGGTGAAGGTGAT                | ATTCTTGTCCCTTCTGTTCTA              |
| RPL13A                                  | AGCCGCATCTTCTGGCGGA                | TTGTCGTAGGGCGGTGGGATG              |
| <b>Primers for Figures S4 and 7</b>     |                                    |                                    |
| Target                                  | Forward                            | Reverse                            |
| SLC2A1                                  | CTGTCTGGCATCAACGCTGTCTT            | TCCTCGGGTGTCTTGTCACTTTGG           |
| CAIX                                    | TAAGCAGCTCCACACCCTCT               | CCTCAATCACTCGCCCATTCA              |
| RPLP0                                   | AACATCTCCCCCTTCTCC                 | CCAGGAAGCGAGAATGC                  |
| <b>Primers for Figures 5A and 6</b>     |                                    |                                    |
| Target                                  | Forward                            | Reverse                            |
| RPS24 Short<br>(NM_001026)              | GACTTGCAAGACATGGCCTGT              | TCCTTCGGCTTTTTGCCA                 |
| RPS24 Long<br>(NM_033022)               | GACTTGCAAGACATGGCCTGT              | TCCAGCTCACTTTTTGCCAG               |
| RPLP0                                   | AACATCTCCCCCTTCTCC                 | CCAGGAAGCGAGAATGC                  |
| RPL13A                                  | AGCCGCATCTTCTGGCGGA                | TTGTCGTAGGGCGGTGGGATG              |
| <b>Cloning Primers for Figure 5B</b>    |                                    |                                    |
| Target                                  | Forward                            | Reverse                            |
| RPS24 Short<br>(NM_001026)              | ATCGATGGTACCATGAACGACACCGT<br>AACT | ATCGATGGATCCTTACTCCTTCGGC<br>TTTTT |
| RPS24 Long<br>(NM_033022)               | ATCGATGGTACCATGAACGACACCGT<br>AACT | ATCGATGGATCCTCACTTTTTGCCA<br>GCACC |
| <b>Primers for Figures 3, 4, and S5</b> |                                    |                                    |
| Target                                  | Forward                            | Reverse                            |
| RPL10 e1                                | CCACCCCTTCCACGTCATCC               | CTTGCAGTCCTTCCCAGCCT               |
| RPL10 e2                                | CCACCCCTTCCACGTCATCC               | CCGCTTTTCAGCCACCATGTC              |
| RPL10 e3                                | AAGCCGTACCCAAAGTCTCGC              | CCCAGCACAGGACAACATCTT              |
| RPL10A                                  | GGAGACGGTGGAGTTGCAGA               | ACTTAGGGCGGGGAGTGGAC               |
| RPL11                                   | AAGCTCCGCTTCTCTTCTCCTGC            | TGTCTCCACTCTCCCCAACACA             |
| RPL12                                   | ACCGGAGGTGAAGTCGGTGC               | TCTTCTGTCTCTTGGTGGTTCC             |
| RPL13 e1                                | GTCCCATCCGGCCCATCGTG               | GGAAGAGGATGAGTTTGGAGCG             |
| RPL13 e2                                | GGTCCCATCCGGCCCATCGT               | TGGACTTGTTCCGCCTCCTCG              |
| RPL13A                                  | TGGTGCTTGATGGTTCGAGGC              | CCCGGAAGTGGTAGGGGCCT               |
| RPL14                                   | TTCTCGCCTAACGCCGCCAA               | ACAATCGCGACCAATTTTCCGG             |
| RPL15 e1                                | AGCAGGGGGCGGGACAATAG               | CTGTGGAGAGCAGAGAGCTGG              |
| RPL15 e2                                | TTGCTCTTCCATCCGCCTTTGA             | ACTGCTTCTTTCTCCATAGCTCC            |
| RPL15 e3                                | GAGCGAGCTGGACGCCACTG               | TGGAGCTGGAGAGTATTGCGC              |
| RPL15 e4                                | CCGAAAACGCCAGTTCCTAAG              | TCAGCCCACGCATCTCCCTG               |
| RPL17 e1                                | TTCGCTATTCATTGACCCGGA              | ACACCTGCCAACTCCACCATTG             |
| RPL17 e2                                | GCCCAATCCTCCTGCCATCG               | GCCTACCAATCCAGTCAACC               |

RPL17 e3  
RPL17 e4  
RPL17 e5  
RPL18 e1  
RPL18 e2  
RPL18 e3  
RPL18 e4  
RPL21  
RPL22  
RPL22L1  
RPL28  
RPL3 e1  
RPL3 e2  
RPL31 e1  
RPL31 e2  
RPL32  
RPL38 e1  
RPL38 e2  
RPL40 (UBA52)  
RPL41  
RPL6 e1  
RPL6 e2  
RPL7L1 e1  
RPL7L1 e2  
RPL7L1 e3  
RPL9 e1  
RPL9 e2  
RPL9 e3  
RPLP0 e1  
RPLP0 e2  
RPLP1  
RPS14  
RPS15A e1  
RPS15A e2  
RPS16 e1  
RPS16 e2  
RPS18  
RPS2  
  
RPS21 e1  
RPS21 e2  
RPS24 e1  
RPS24 e2  
RPS27A  
RPS3 e1  
RPS3 e2  
RPS3 e3  
RPS3A  
RPS4Y1  
RPS9 e1  
RPS9 e2

GCCCAATCCTCCTGCCATCG  
GGTTGACTGGATTGGTGAGGC  
TTTCTTCGGCTACGAATCTCGC  
ACTCGCTTGAGGCTTTCCCC  
ACAAGGACCGAAAGGTTCCGGC  
TGTGCGGGTTCAGGAGGTAC  
CCGCCTCTGTCCCTTTCCCG  
CACAAAGGGAAAGAGGAGAGGC  
AGTGAACGGAAAAGCTGGGAAC  
ACAGGAAGCCCAAGAGGTCAAC  
CCTGCCACCTCCTATGTGCG  
TTGTGGGCATTGTGGGCTACG  
TGATGAATGCAAGAGGCGTTTC  
AATCCGTGTGCGGCTGTCCA  
GAATCCGTGTGCGGCTGTCC  
CCGTCCCTTCTCTCTTCCCTCG  
GCCCCGAAACGGAAGTCTCG  
GTCCTGGTCCGCGCCAGAGC  
GGCGATTAGGTGGTTTCCGGTT  
ACCCGGCGCTCCATTAATAGC  
CCGCAACCCTGTCCTTGTC  
GAAGCCGGGACCTTAATTCTCT  
GAAAGATGGCGGAGCAAGA  
GCGTGAGTTTACTGGTGCAGAG  
TATCAAGCCCTCAAAGCCACCC  
TCTCAGCAATCAGACTGTGAC  
CGGAGGGACTTCAATCACATCA  
ATGCTCACTTCCCCATCAACGT  
CAGCCAATAGACAGGAGCGC  
CCGAGAAGACCTCCTTTTTCCA  
TGCACGACGATGAGGTGACAG  
CCCTCCCACTCTCTTTCCG  
CTCTTTCCGCCATCTTTCCGC  
ATTGTTGTGAACCTCACAGGCA  
AGCTGTGGCGCACTGCAAAC  
TCGGCAAGGAGCGATTTGCT  
AAAGTCCAGCATATTTTGCAGT  
CAGTGCAGAAGCAGACCCGT  
  
GGTGAGTCAGATGATTCCATTCTCC  
AGGTCACAGGCAGGTTTAATGG  
AAGAAAGCAACGAAAGGAACGC  
ACGAAAGGAACGCAAGAACAGA  
GGCGTTCTTCTTTTCGATCCG  
TCAGAACAGAAGGGTGGGAAGC  
AGAGGTTTGGCTTTCCAGAGGG  
GCCACTTCTTTCTTTTCAGCG  
GTCACCAGGACCCAAGGAACC  
AACCCACCAAGAAGCCAAACTC  
CTGGCCAAGATCCGCAAGGC  
GTGCTGGATGAGGGCAAGATGA

CGGGTCAAGTGAATAGCGAACC  
ATTTCTGGGGTTCTCCGGG  
CGGGTCAAGTGAATAGCGAACC  
ATGTGGAGTTGGTTCTTCTGGC  
CGGAAAGGGACAGAGGCGG  
GCTGGTCGAAAGTGAGGATCT  
CCCGCACATCATCAGTTATGGT  
TGTTTACAACAATGCCAACAGCA  
CTCGTCTTCTCCTCTTCTTCG  
GCGTTCATGTGAACAACATTCC  
CCGCTTCTCTTACCATCACA  
TCCTCATCCTGCCATTTCTTGC  
TCCAGCTTCTCGGCCACAGT  
CGATCAGCGATTAGTTCTCATCCA  
TGCTTTCCTCTTCTTGTTCGGT  
TTTGACGATCTTGGGCTTCACA  
GCGACGAGGCGCGCT  
ATTTGGCATCCTTTCGTCCGGC  
AGGGTGATGGTTTTGCCAGTGA  
CTTGGCTCTCATGGCGCAGA  
GCCGTTCTTGTACCACCAAC  
CTGCCAATTCCTCTGACAAGGA  
AGGCATGAGGTTTCACTTCTAG  
ACTGAGAGGTGGAAAGGGCA  
TTTCGATGCGTACAACAAGGC  
ATGTGATTGAAGTCCCTCCGCA  
CCAGTTCCTTTCTGTTACCCCA  
GTGGCTTGTGAATCAAAGCCG  
GTCAGGGATTGCCACGCAGG  
AGGACTCGTTTGTACCCGTTGA  
AGCAGTGGAGGGGGCAGGAC  
ACATTCTCTCTTCAGCCACCT  
GGCGTTTGCCTCTCTTTTCCG  
AAACTGGCGGGATGGAAGCAG  
ACCACCCTTACACGGACACG  
GGCCACCAGGGCTTTGGAGAT  
GTCTGCTTTCCTCAACACCACA  
GTGCGGAGACGATGCCAGTG  
AAATATTCCACATCTGTGATTCTCT  
CCA  
CCTTGGCCAATCGGAGAATGGA  
CTGTGATCCAATCTCCAGCTCA  
GCCACAGCTAACATCATTGCAG  
TCGAGGGTGATGGTCTTCCC  
ACAGGACAACGAATCAAGGTGC  
CTAGGAGTTTGTAAACGCAGAGACT  
AGCAGTCAGTTCCCGAATCC  
GTCATTTGTCTGCACCTCTCGG  
GCGGTGAACAGCAAACGGC  
GGGATGTTACCACCTGCTTG  
CGGACAATGAAGGACGGGATGT

RPS9 e3  
RPSA

GTGCTGGATGAGGGCAAGATGA  
TTGTTGCCATTGAAAACCCTGC

TGAGCTGTGTGCAAGGGTGAAT  
GTCAGTAACCACAAGAAGCCGT
